# Supplementary material for: Reactions of Trifluorotriacetic Acid Lactone and Hexafluorodehydroacetic Acid with Amines: Synthesis of Trifluoromethylated 4-Pyridones and Aminoenones
Source: MDPI journal article supplement (doi:10.3390/molecules27207098), 2022-10-20

## Supplementary Materials

# Reactions of Trifluorotriacetic Acid Lactone and Hexafluorodehydroacetic Acid with Amines: Synthesis of Trifluoromethylated 4-Pyridones and Aminoenones

Vladislav V. Fedin, Sergey A. Usachev, Dmitrii L. Obydenov and Vyacheslav Y. Sosnovskikh \*

Institute of Natural Sciences and Mathematics, Ural Federal University, 51 Lenina Ave., 620000 Ekaterinburg, Russian Federation

\* Correspondence: vy.sosnovskikh@urfu.ru; Tel.: +7 (343) 3899597

### Table of contents

|                                                                                                                                                                                |        |
|--------------------------------------------------------------------------------------------------------------------------------------------------------------------------------|--------|
| <b>Figure S1.</b> UV/Vis spectra of compounds <b>5</b>                                                                                                                         | S2     |
| <b>Table S1.</b> Characteristic chemical shifts in $^1\text{H}$ , $^{13}\text{C}$ , and $^{19}\text{F}$ NMR spectra of compounds <b>3</b>                                      | S3     |
| <b>Table S2.</b> Characteristic chemical shifts in $^1\text{H}$ , $^{13}\text{C}$ , and $^{19}\text{F}$ NMR spectra of compounds <b>5</b>                                      | S4     |
| <b>Table S3.</b> Characteristic chemical shifts in $^1\text{H}$ , $^{13}\text{C}$ , and $^{19}\text{F}$ NMR spectra of <i>E</i> - and <i>Z</i> -isomers of enaminones <b>9</b> | S5     |
| $^1\text{H}$ , $^{19}\text{F}$ , and $^{13}\text{C}$ NMR spectra of compounds <b>1–5</b> , <b>9</b> , <b>10</b> , <b>13</b> , <b>14</b> and <b>B'</b>                          | S6-S70 |

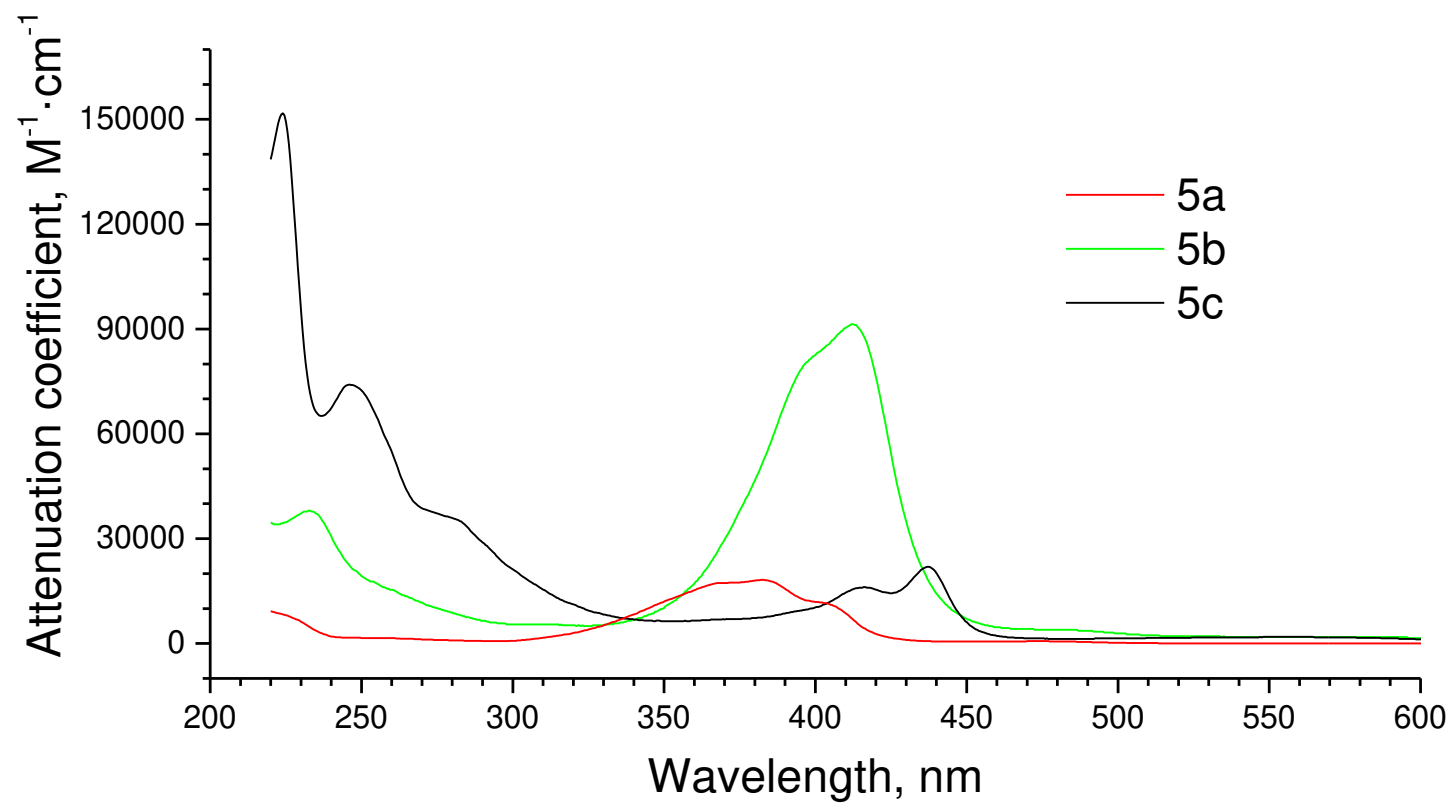

**Figure S1.** UV/Vis spectra of compounds **5** in EtOH ( $10^{-5}$ – $10^{-6}$  M)

**Table S1.** Characteristic chemical shifts in the  $^1\text{H}$ ,  $^{13}\text{C}$ , and  $^{19}\text{F}$  NMR spectra of compounds **3** in  $\text{CDCl}_3$ ,  $\delta$ , ppm ( $J$ , Hz)

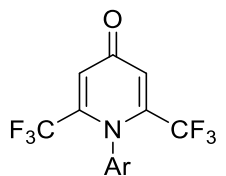

| <b>3</b> | Ar                                                | $\text{CF}_3$ | 3- $\text{CH}$ ,5- $\text{CH}$ | $\text{CF}_3$    | 2- $\text{CCF}_3$ ,6- $\text{CCF}_3$ | 3- $\text{CH}$ ,5- $\text{CH}$ | 4- $\text{CO}$ |
|----------|---------------------------------------------------|---------------|--------------------------------|------------------|--------------------------------------|--------------------------------|----------------|
| <b>a</b> | Ph                                                | 100.7         | 6.97                           | 119.4<br>(275.7) | 141.2<br>(33.3)                      | 119.4<br>(4.7)                 | 177.4          |
| <b>b</b> | 4-MeOC <sub>6</sub> H <sub>4</sub>                | 100.5         | 6.95                           |                  |                                      |                                |                |
| <b>c</b> | 3,4-F <sub>2</sub> C <sub>6</sub> H <sub>3</sub>  | 100.7         | 6.96                           | 119.3<br>(275.7) | 140.9<br>(33.3)                      | 119.4<br>(4.7)                 | 177.1          |
| <b>d</b> | 4-BrC <sub>6</sub> H <sub>4</sub>                 | 100.7         | 6.97                           | 119.3<br>(275.8) | 141.0<br>(32.8)                      | 119.3<br>(4.5)                 | 177.3          |
| <b>e</b> | 2,5-F <sub>2</sub> C <sub>6</sub> H <sub>3</sub>  | 98.5          | 6.99                           | 119.3<br>(275.5) | 140.8<br>(34.1)                      | 119.5<br>(4.6)                 | 177.2          |
| <b>f</b> | 3-AcC <sub>6</sub> H <sub>4</sub>                 | 100.8         | 6.99                           | 119.2<br>(276.1) | 141.6<br>(unresolved)                | 119.0<br>(unresolved)          | 177.2          |
| <b>g</b> | 3-F <sub>3</sub> CC <sub>6</sub> H <sub>4</sub>   | 98.7          | 6.99                           | 119.3<br>(275.5) | 140.9<br>(33.4)                      | 119.4<br>(4.7)                 | 177.2          |
| <b>h</b> | 2-MeC <sub>6</sub> H <sub>4</sub>                 | 99.0          | 7.01                           | 119.3<br>(275.8) | 141.3<br>(32.2)                      | 119.6<br>(4.2)                 | 177.9          |
| <b>i</b> | 2-ClC <sub>6</sub> H <sub>4</sub>                 | 98.7          | 7.02                           | 119.3<br>(275.8) | 140.9<br>(33.9)                      | 119.6<br>(4.5)                 | 177.6          |
| <b>j</b> | 2,5-Me <sub>2</sub> C <sub>6</sub> H <sub>3</sub> | 99.0          | 7.01                           |                  |                                      |                                |                |
| <b>k</b> | 4-O <sub>2</sub> NC <sub>6</sub> H <sub>4</sub>   | 101.0         | 7.01                           |                  |                                      |                                |                |

**Table S2.** Characteristic chemical shifts in the  $^1\text{H}$ ,  $^{13}\text{C}$ , and  $^{19}\text{F}$  NMR spectra of compounds **5** in  $\text{DMSO-}d_6$ ,  $\delta$ , ppm ( $J$ , Hz)

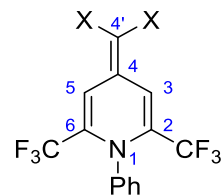

| <b>5</b> | Structure | $\text{CF}_3$ | $H$ -3,5 | $\text{CF}_3$    | $C$ -2, $C$ -6  | $C$ -3, $C$ -5 | $C$ -4 | $C$ -4' | 2C Ph | 2C Ph | C Ph  | C Ph  |
|----------|-----------|---------------|----------|------------------|-----------------|----------------|--------|---------|-------|-------|-------|-------|
| <b>a</b> |           | 102.5         | 7.26     | 118.7<br>(275.9) | 138.2<br>(33.0) | 112.7<br>(5.3) | 154.2  | 57.1    | 130.0 | 130.4 | 132.1 | 135.6 |
| <b>b</b> |           | 103.2         | 9.77     | 119.8<br>(275.5) | 138.3<br>(32.3) | 116.8<br>(5.7) | 153.0  | 95.0    | 128.7 | 130.1 | 131.7 | 134.6 |
| <b>c</b> |           | 102.8         | 9.10     | 119.2<br>(275.2) | 138.9<br>(32.7) | 113.4<br>(5.7) | 146.0  | 107.2   | 128.5 | 130.0 | 131.6 | 135.1 |

**Table S3.** Characteristic chemical shifts in the  $^1\text{H}$ ,  $^{13}\text{C}$ , and  $^{19}\text{F}$  NMR spectra of *E*- and *Z*-isomers of enaminones **9** used for analysis of equilibrium mixtures,  $\delta$ , ppm (*J*, Hz)

**Z-9**                      **E-9**

| R                           | Solvent            | Enaminone   | $\text{CF}_3$ | 2- $\text{CH}_2$ | 4- $\text{CH}$ | 1-NH            | 3-NH  | 1-CO              | 2- $\text{CH}_2$ | C-3               | 4-CH  | 5-CO            | $\text{CF}_3$    |
|-----------------------------|--------------------|-------------|---------------|------------------|----------------|-----------------|-------|-------------------|------------------|-------------------|-------|-----------------|------------------|
| Ph                          | DMSO- $\text{d}_6$ | <b>Z-9a</b> | 87.1          | 3.65             | 5.79           | 10.08           | 12.56 |                   |                  |                   |       |                 |                  |
|                             |                    | <b>E-9a</b> | 86.6          | 4.06             | 5.59           | 10.23 and 10.31 |       |                   |                  |                   |       |                 |                  |
| Ph                          | $\text{CDCl}_3$    | <b>Z-9a</b> | 85.1          | 3.49             | 5.72           | 7.77            | 12.58 | 163.4             | 41.5             | 164.0             | 91.3  | 177.8<br>(33.7) | 117.2<br>(288.3) |
|                             |                    | <b>E-9a</b> | 84.8          | 4.04             | 5.82           | 8.71            | 9.70  | 162.5             | 42.3             | 166.3             | 88.7  | 177.6<br>(32.1) | 117.6<br>(290.2) |
| 4- $\text{BrC}_6\text{H}_4$ | $\text{CDCl}_3$    | <b>Z-9b</b> | 85.0          | 3.41             | 5.70           | 7.43            | 12.42 |                   |                  |                   |       |                 |                  |
|                             |                    | <b>E-9b</b> | 84.8          | 3.98             | 5.78           | 8.32            | 9.62  |                   |                  |                   |       |                 |                  |
| 4-MeOC $_6\text{H}_4$       | $\text{CDCl}_3$    | <b>Z-9c</b> | 85.1          | 3.38             | 5.68           | 7.12            | 12.39 | 164.0 or<br>164.2 | 41.4             | 164.0 or<br>164.2 | 90.9  | 177.5<br>(33.6) | 117.3<br>(288.6) |
|                             |                    | <b>E-9c</b> | 84.9          | 4.00             | 5.68           | 8.74            | 9.63  | 163.2             | 42.0             | 165.9             | 88.25 | 177.9<br>(31.3) | 117.7<br>(290.2) |
| Bn                          | DMSO- $\text{d}_6$ | <b>Z-9d</b> |               | 3.55             | 5.50           | 8.76            | 11.29 |                   |                  |                   |       |                 |                  |
|                             |                    | <b>E-9d</b> |               | 3.84             | 5.27           | 8.45            | 9.08  |                   |                  |                   |       |                 |                  |
| Bn                          | $\text{CDCl}_3$    | <b>Z-9d</b> | 85.1          | 3.31             | 5.44           | 6.04            | 11.32 | 164.9             | 41.1             | 165.3             | 90.2  | 177.0<br>(33.5) | 117.3<br>(288.4) |
|                             |                    | <b>E-9d</b> | 84.9          | 3.79             | 5.41           | 7.90            | 7.90  | 163.5             | 40.5             | 168.0             | 86.3  | 176.9<br>(32.1) | 117.7<br>(290.5) |
| Bu                          | $\text{CDCl}_3$    | <b>Z-9e</b> | 85.0          | 3.27             | 5.36           | 5.65            | 11.08 |                   |                  |                   |       |                 |                  |
|                             |                    | <b>E-9e</b> | 84.9          | 3.75             | 5.32           | 7.10            | 7.36  |                   |                  |                   |       |                 |                  |

$^1\text{H}$  NMR (500 MHz, DMSO)

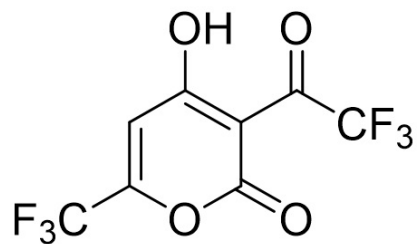

**1**

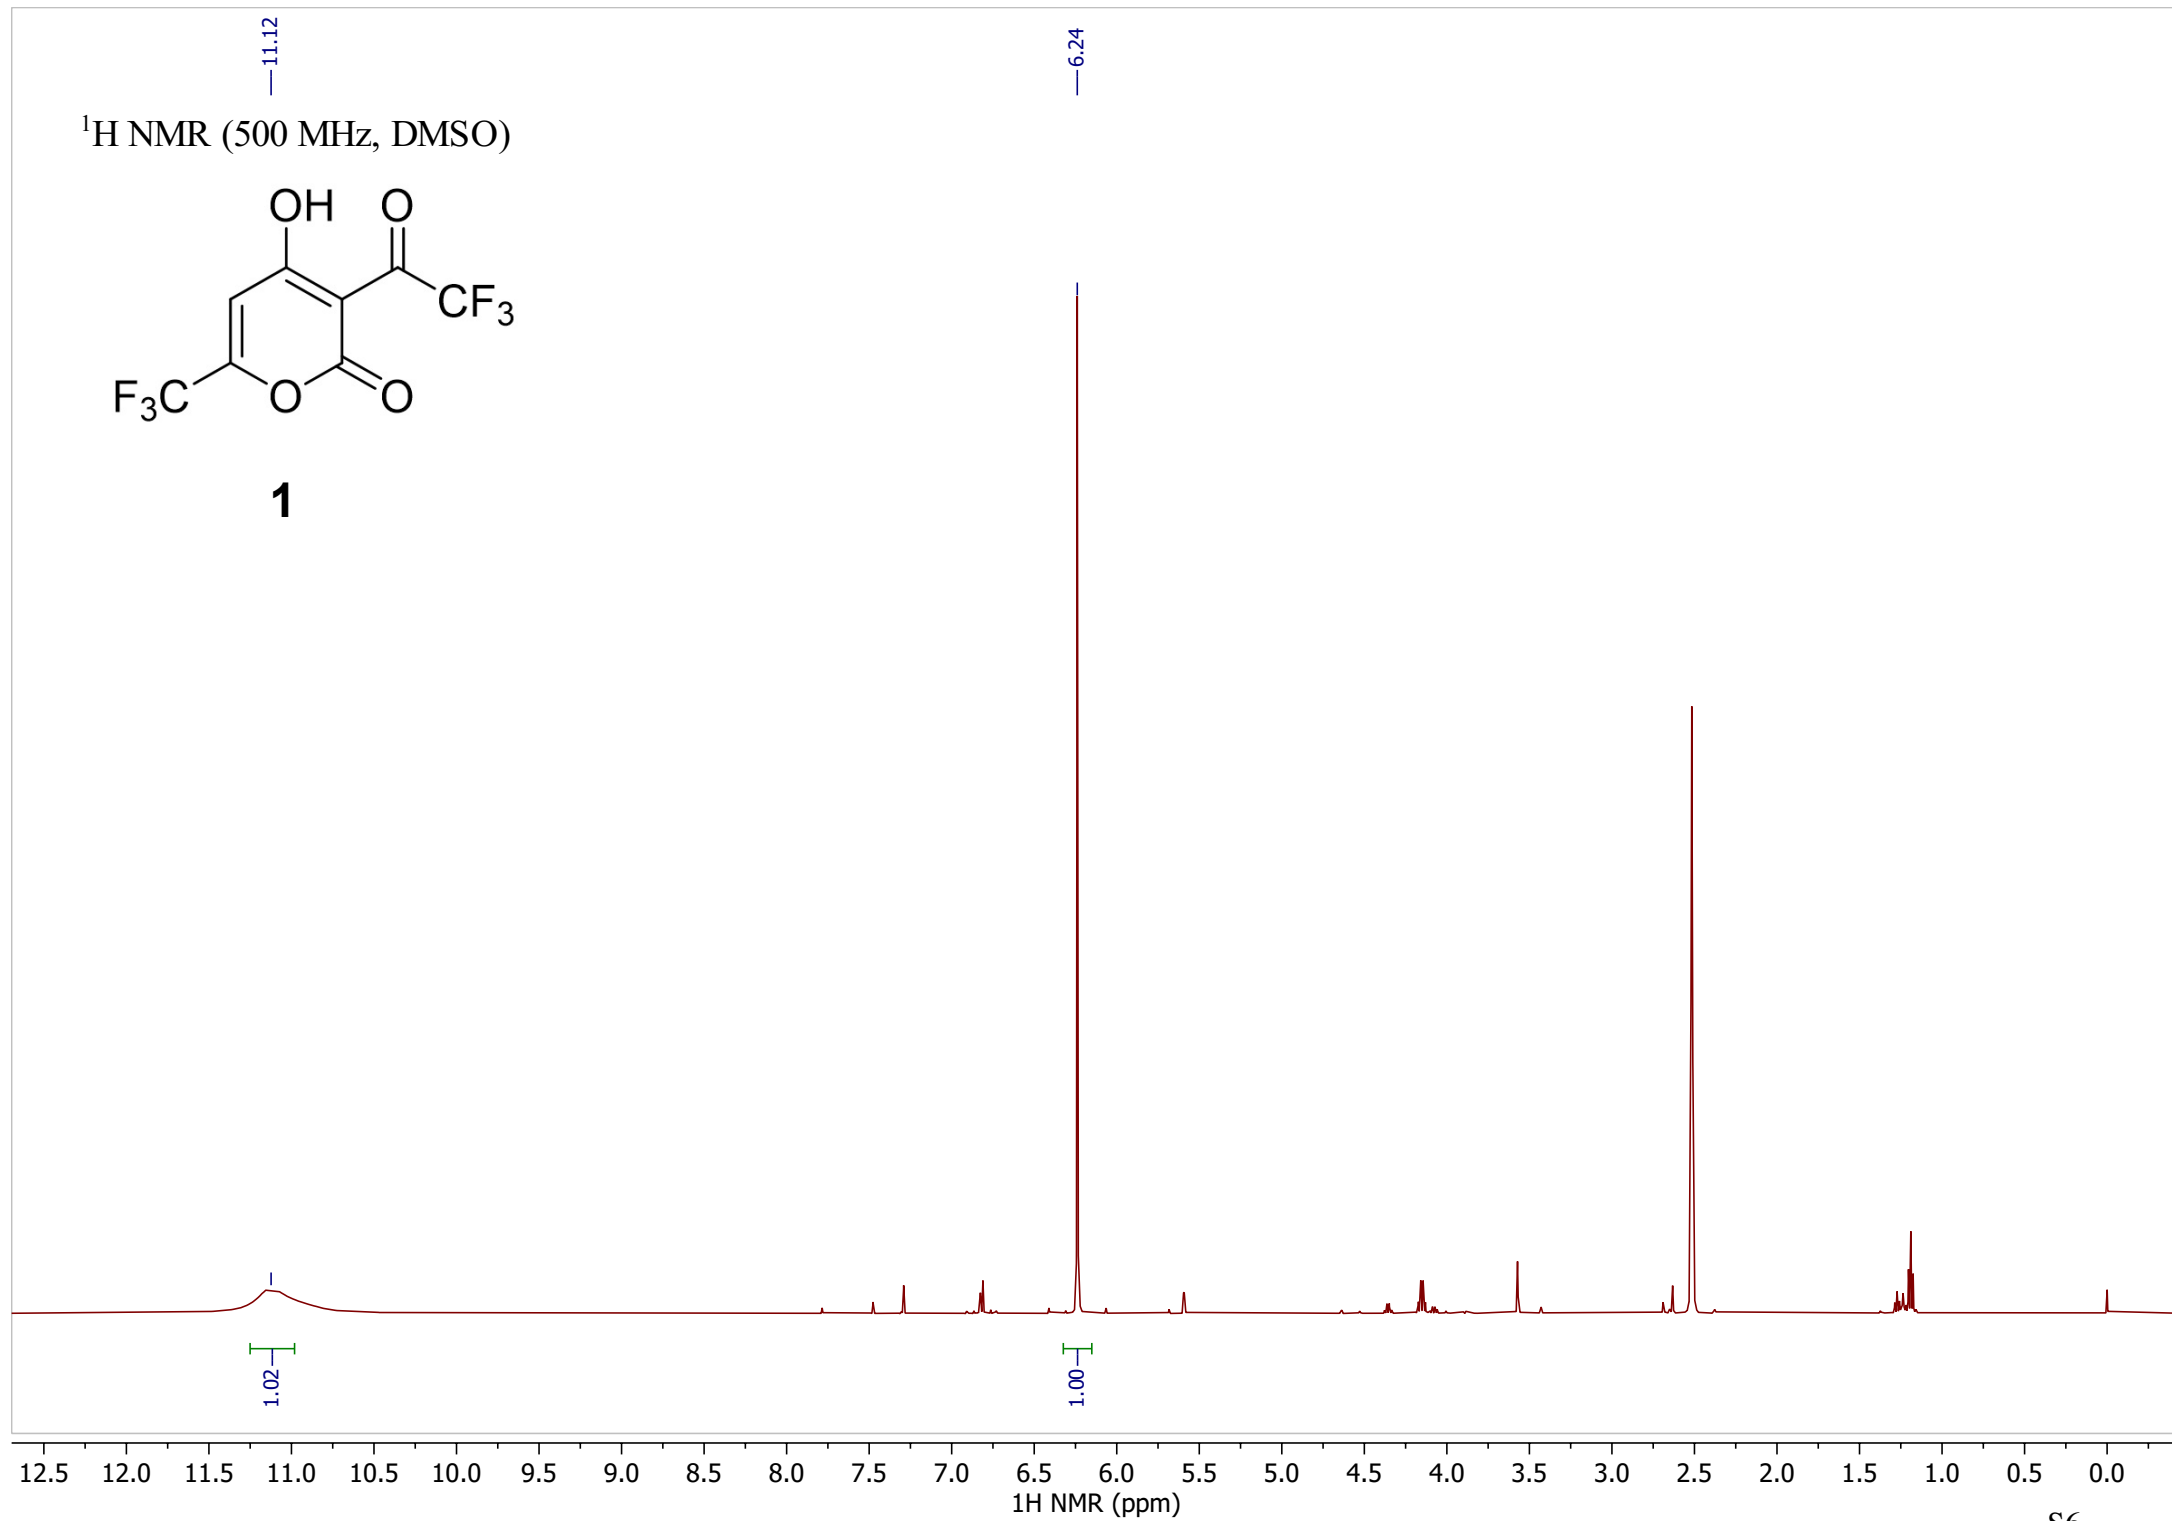

$^{19}\text{F}$  NMR (471 MHz, DMSO)

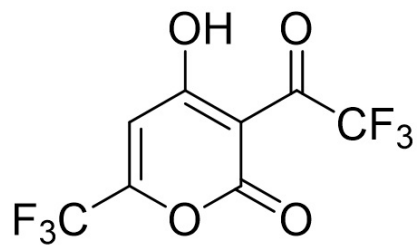

**1**

91.13  
89.64

1.00  
1.00

$^{19}\text{F}$  NMR (ppm)

S7

$^1\text{H}$  NMR (500 MHz, DMSO)

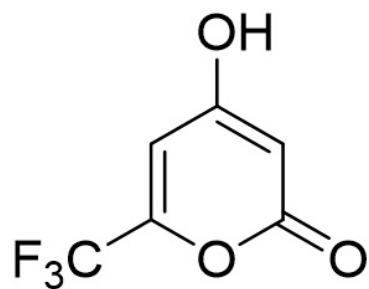

**2**

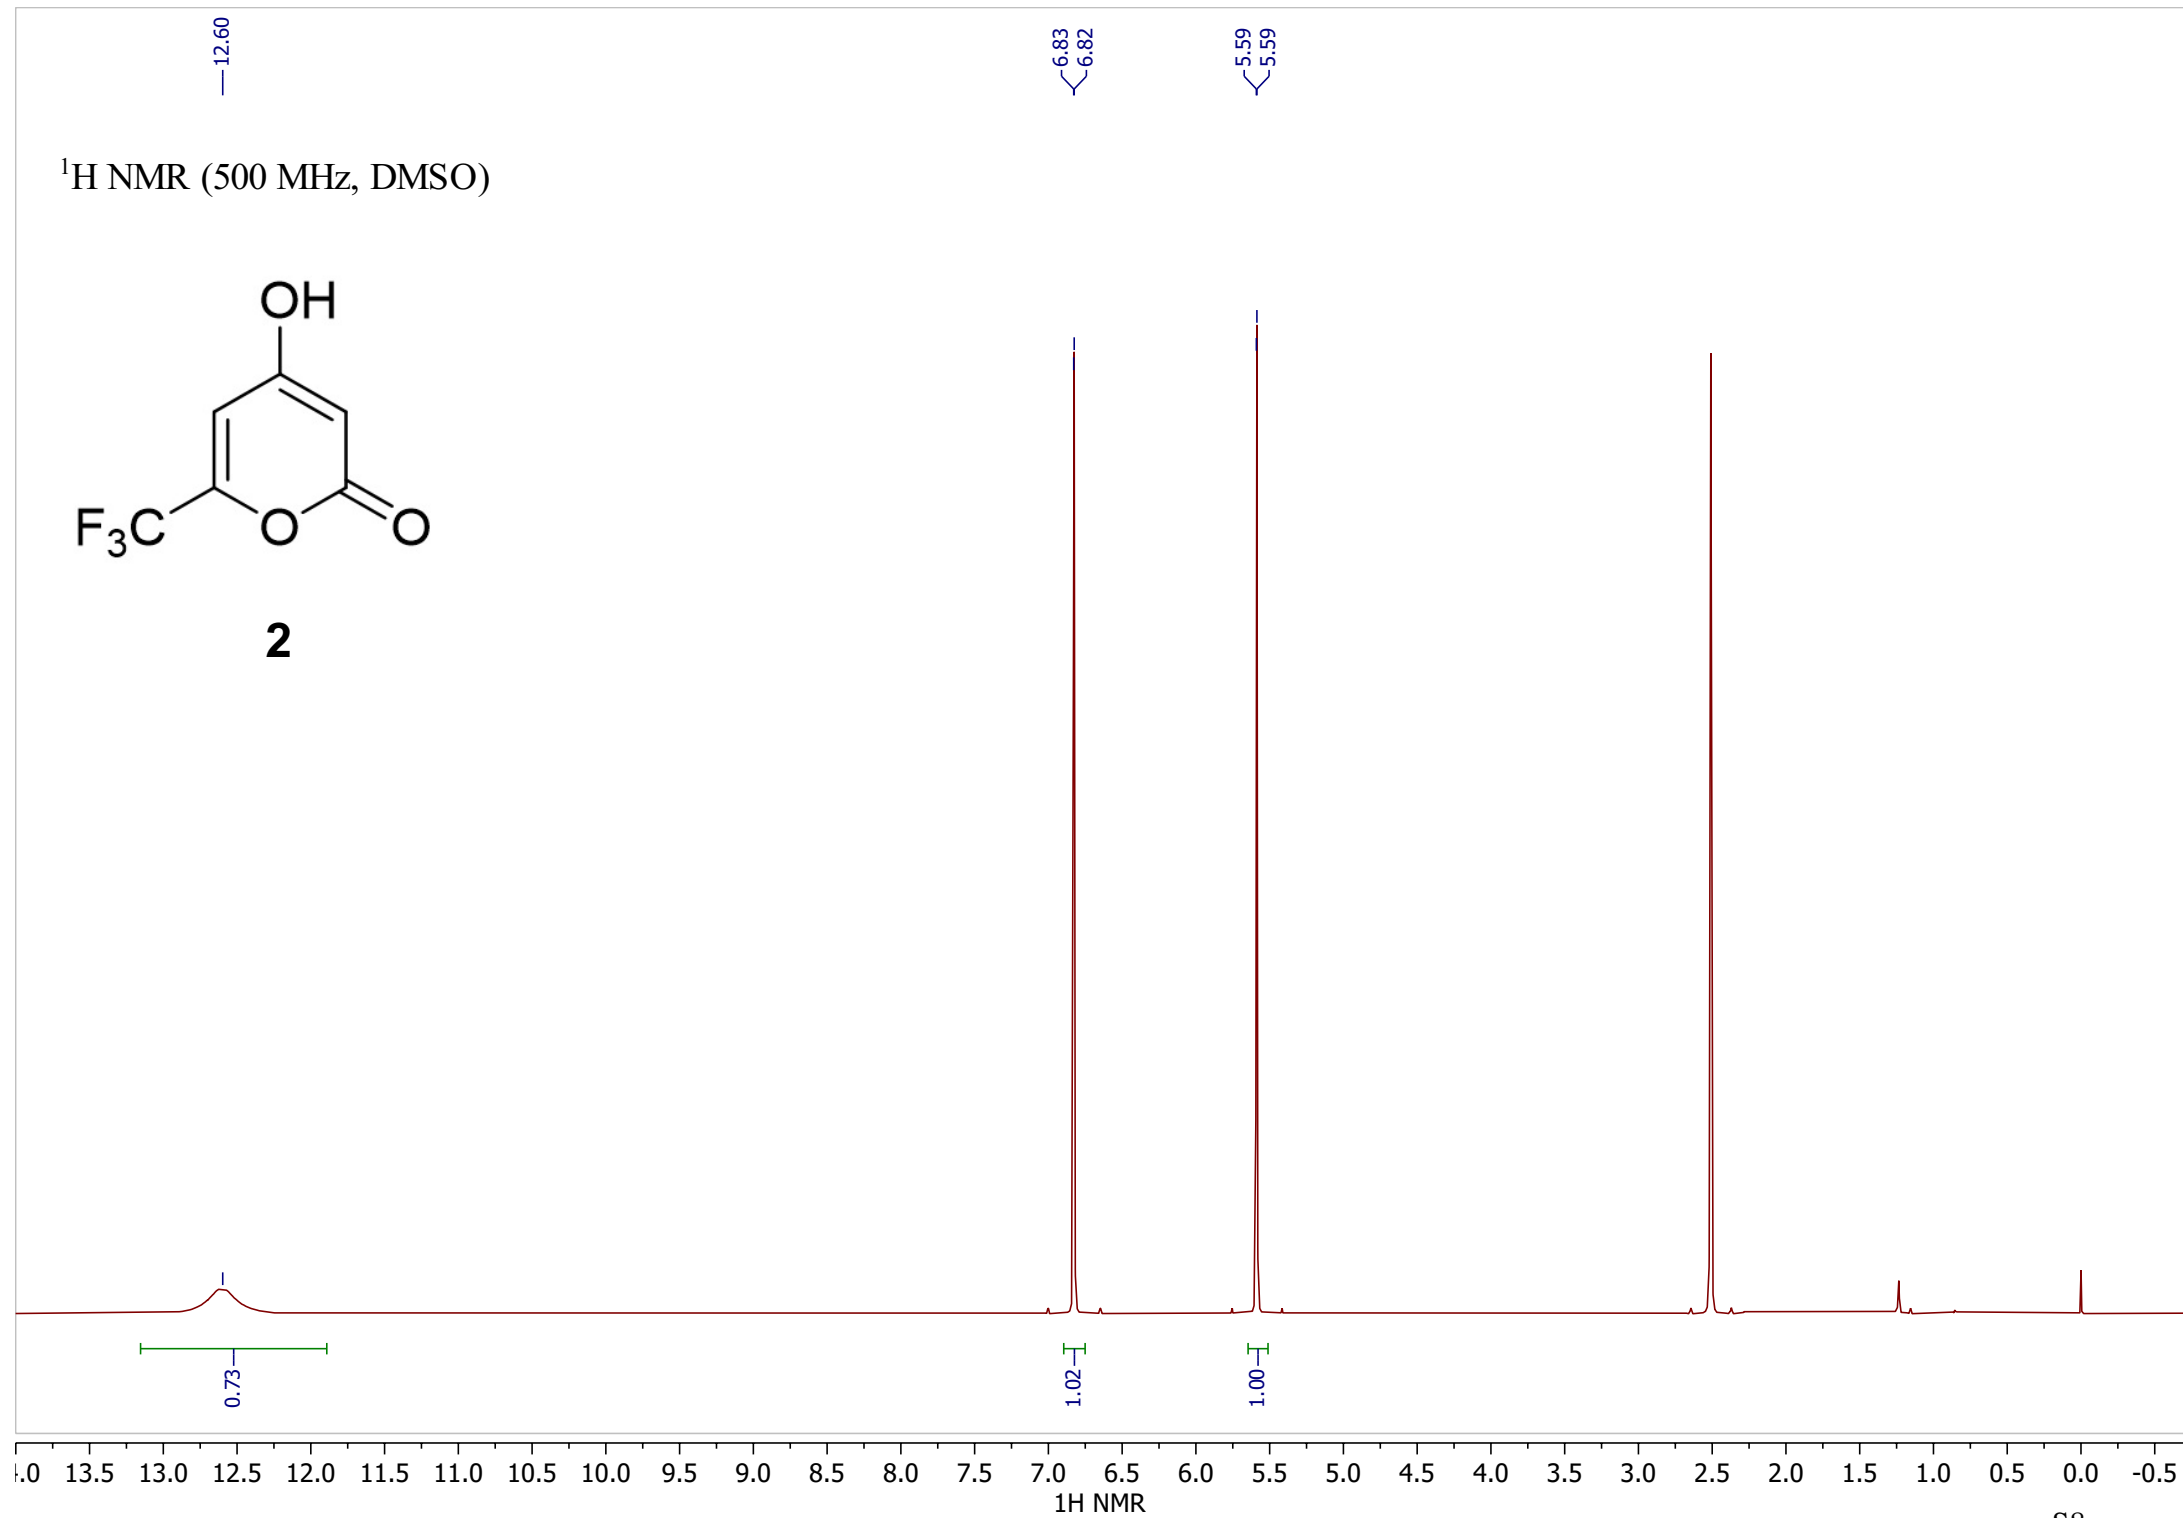



$^{19}\text{F}$  NMR (471 MHz, DMSO)  $\delta$  92.02.

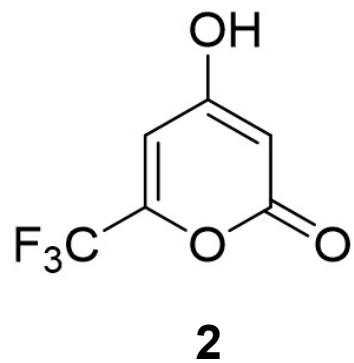

92.02

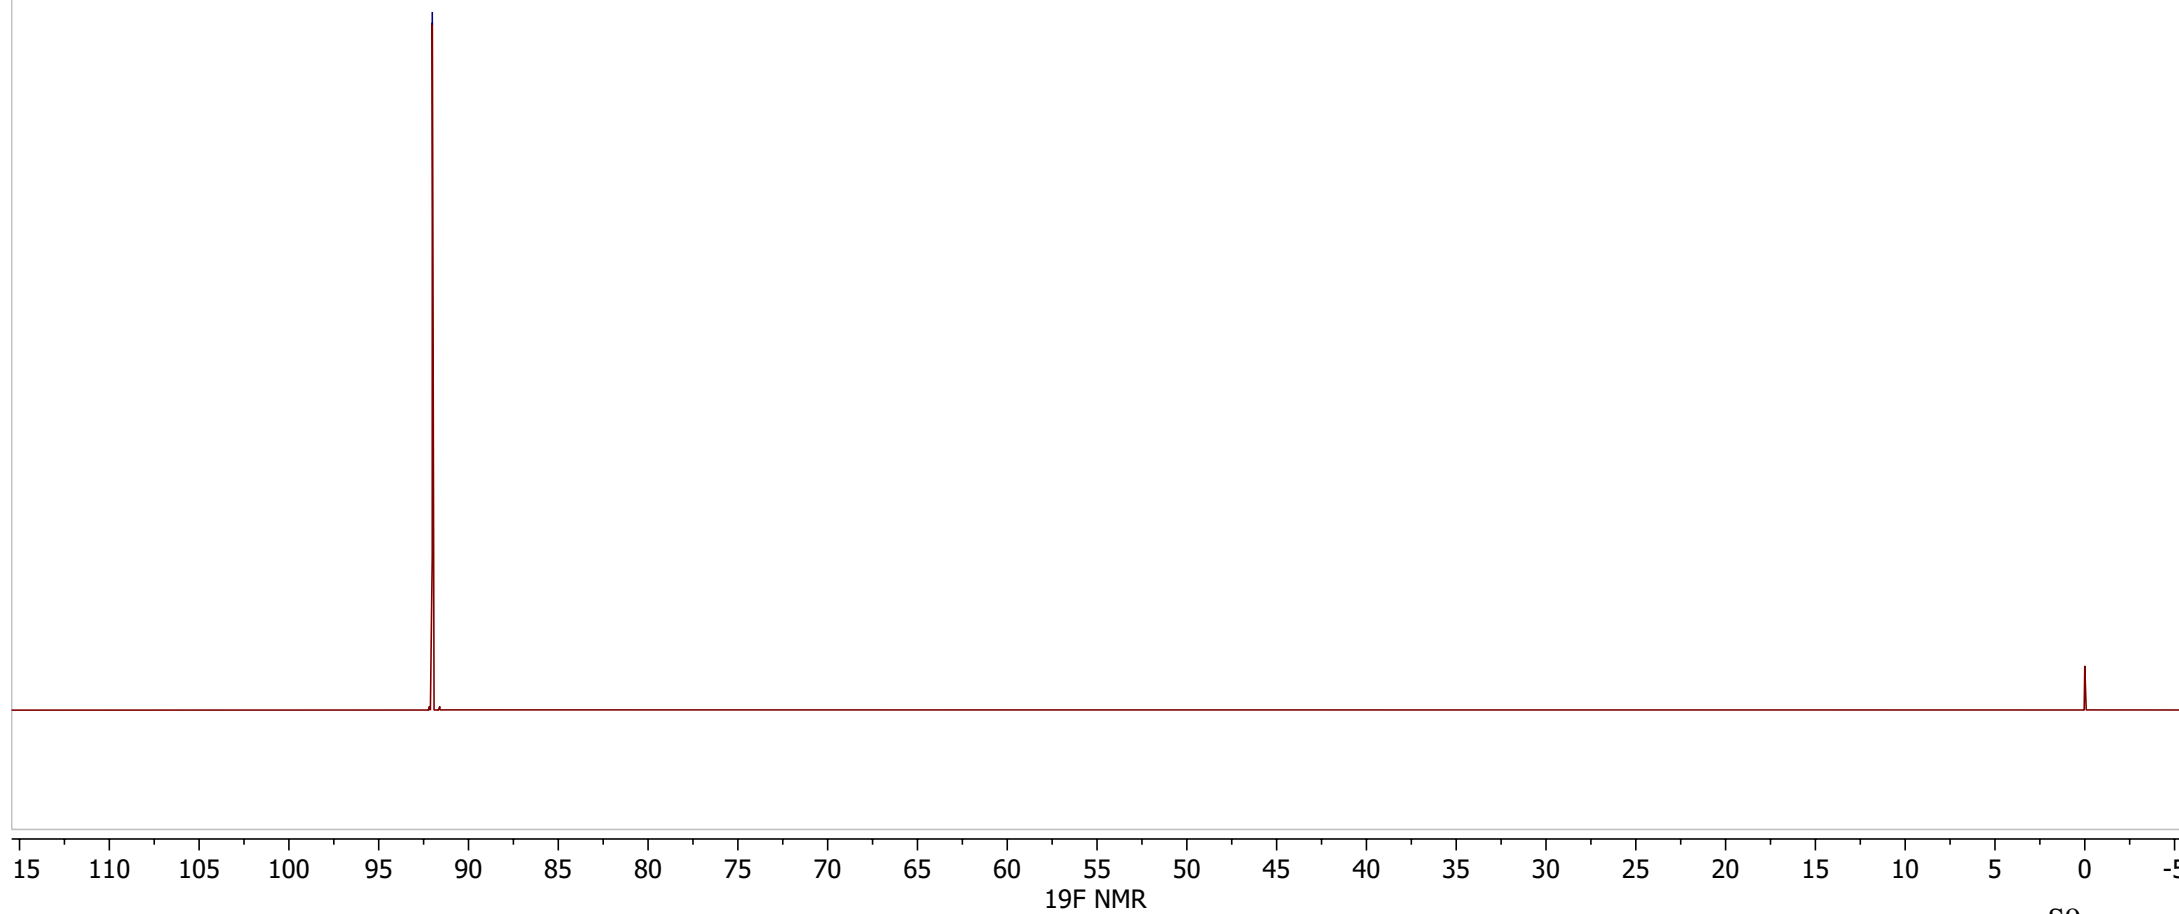

<sup>1</sup>H NMR (500 MHz, CDCl<sub>3</sub>)

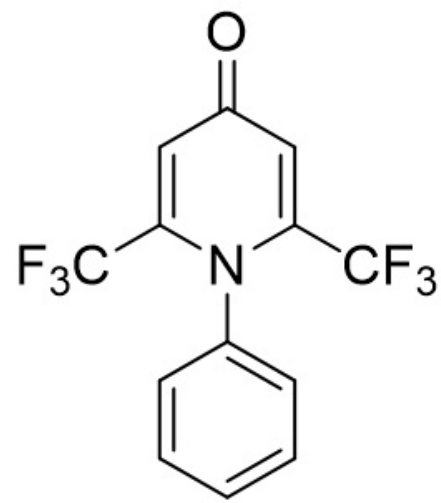

**3a**

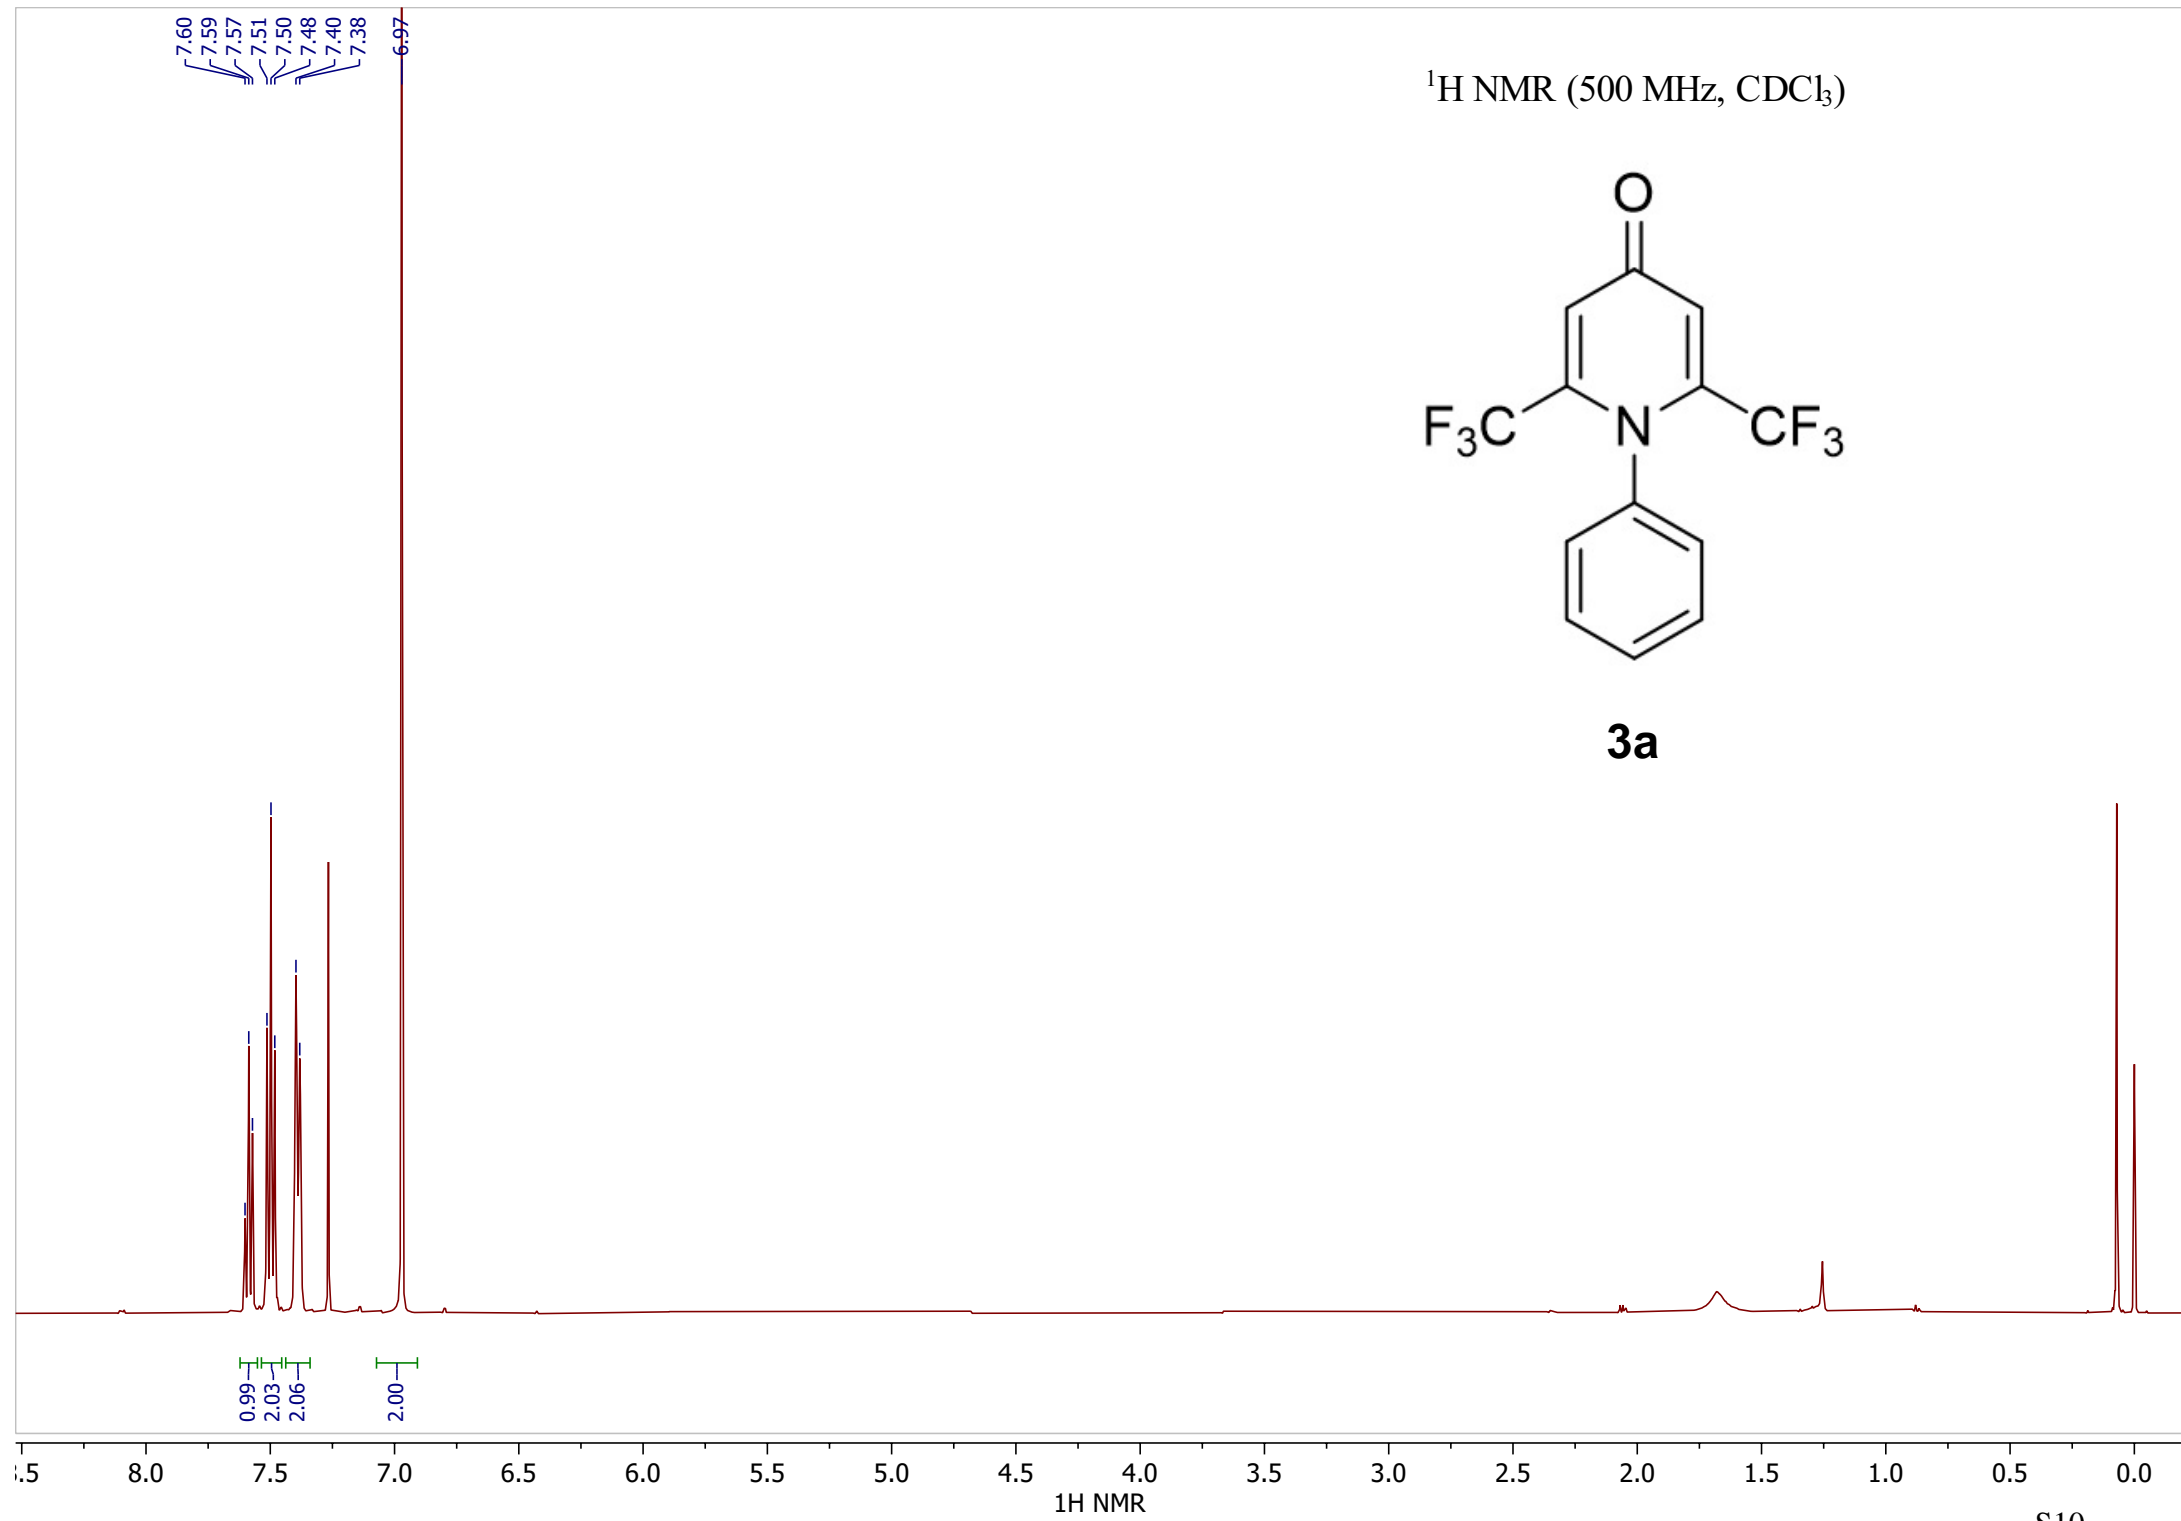

$^{19}\text{F}$  NMR (471 MHz,  $\text{CDCl}_3$ )

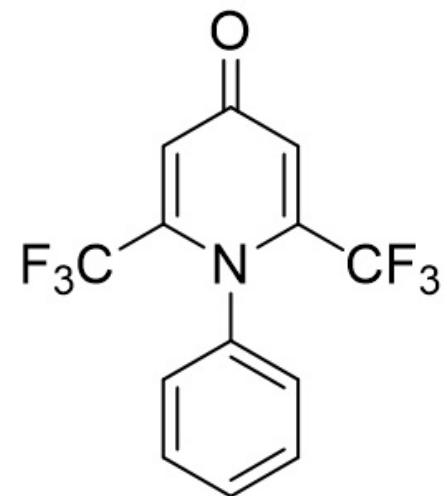

**3a**

100.65

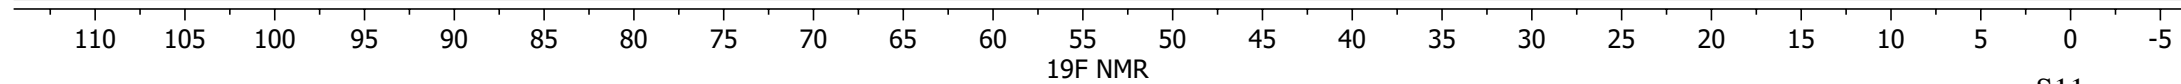

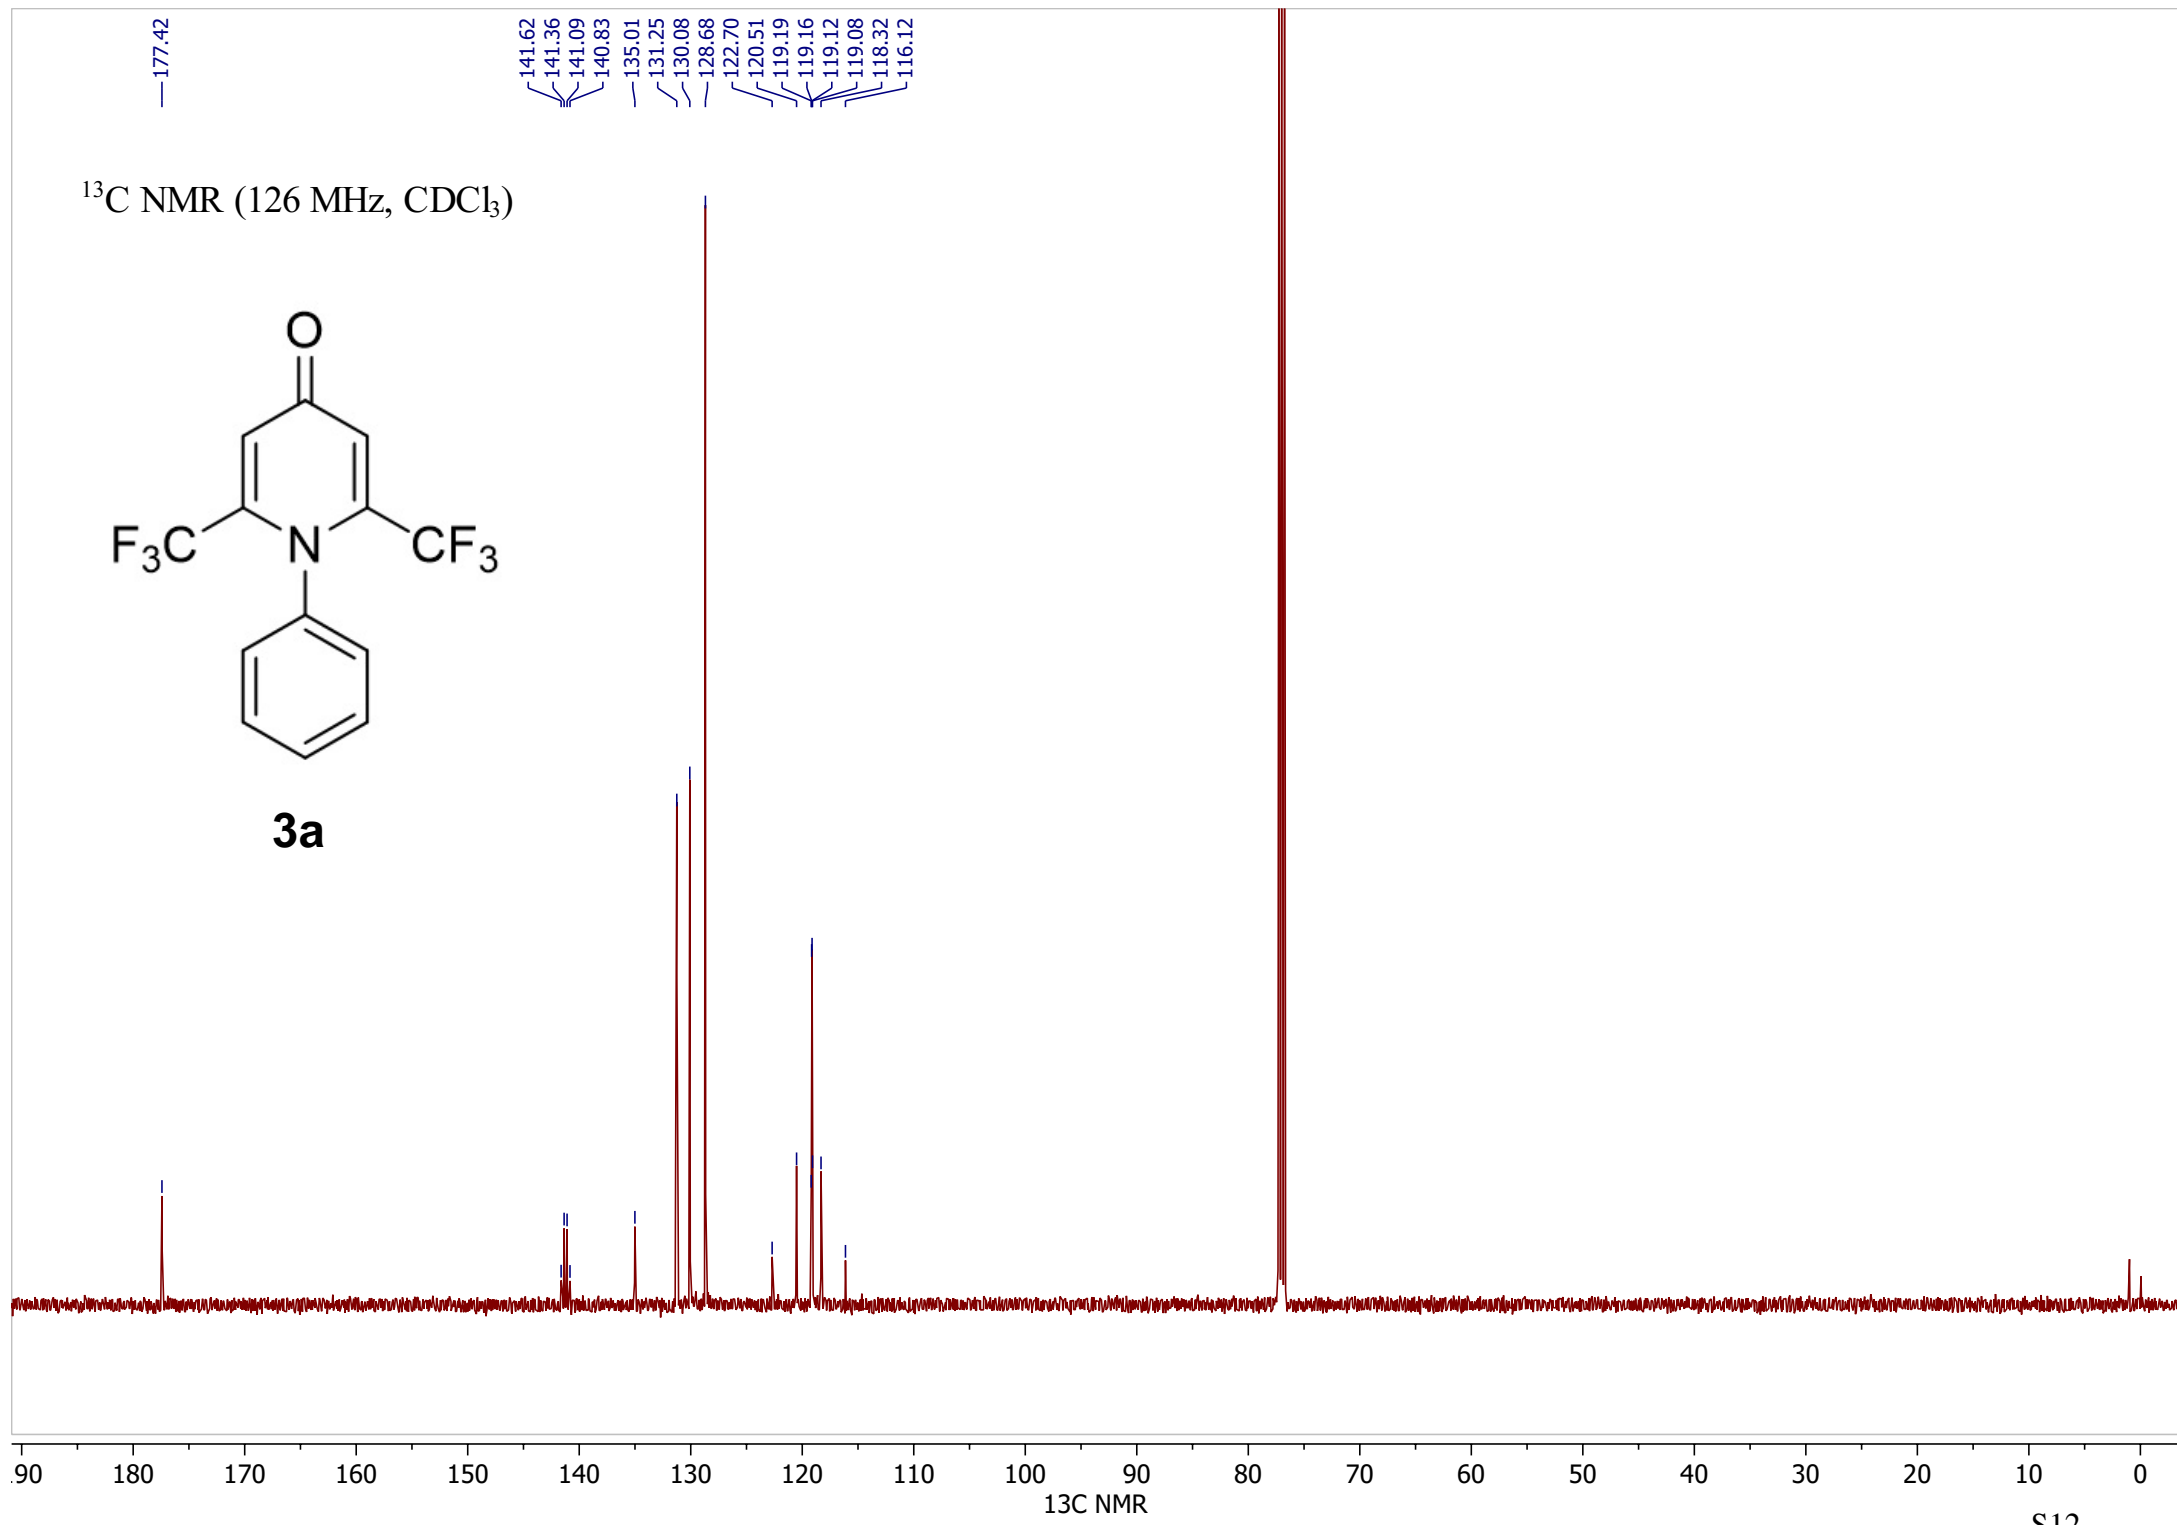

$^1\text{H}$  NMR (500 MHz,  $\text{CDCl}_3$ )

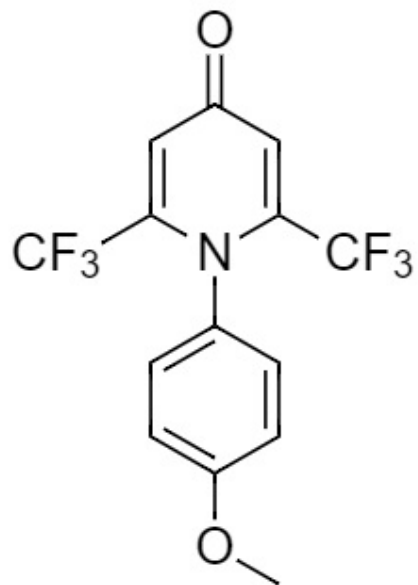

**3b**

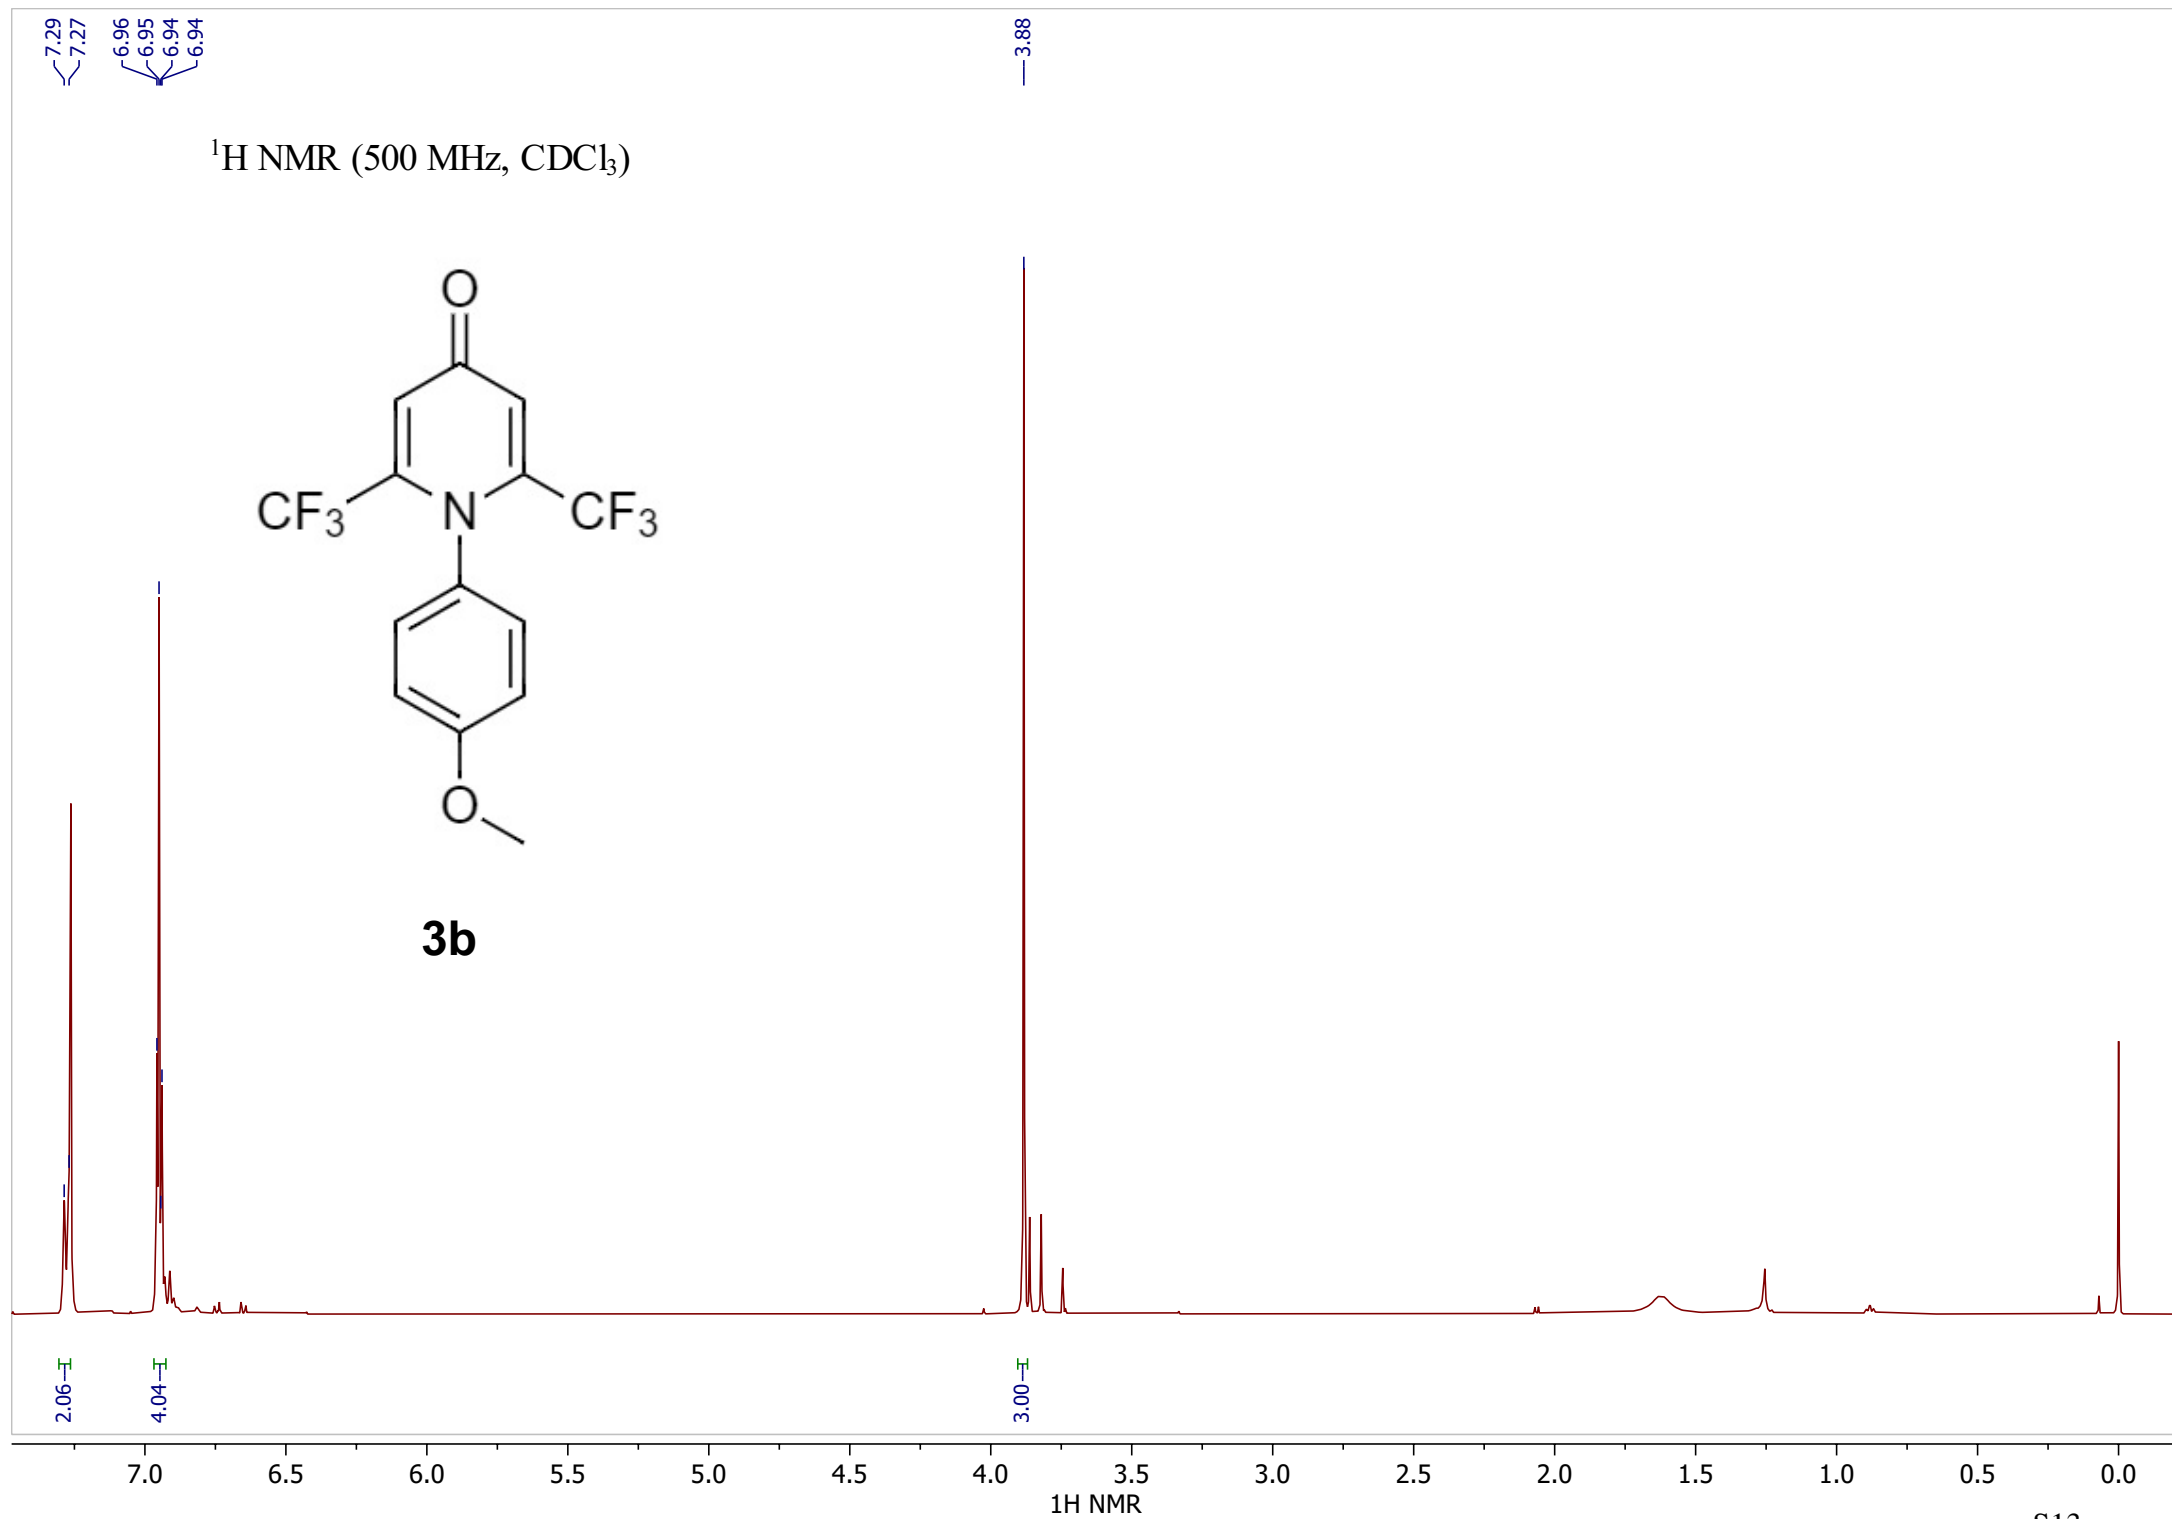

$^{19}\text{F}$  NMR (471 MHz,  $\text{CDCl}_3$ )

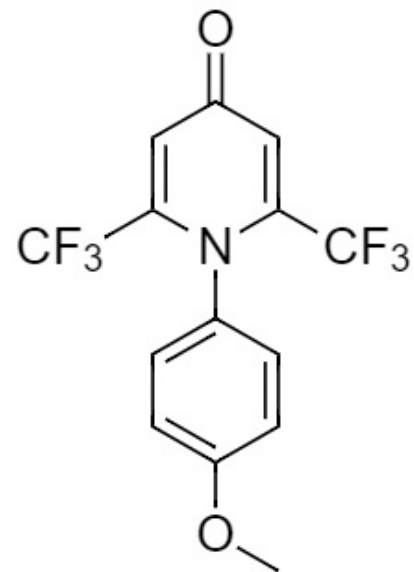

**3b**

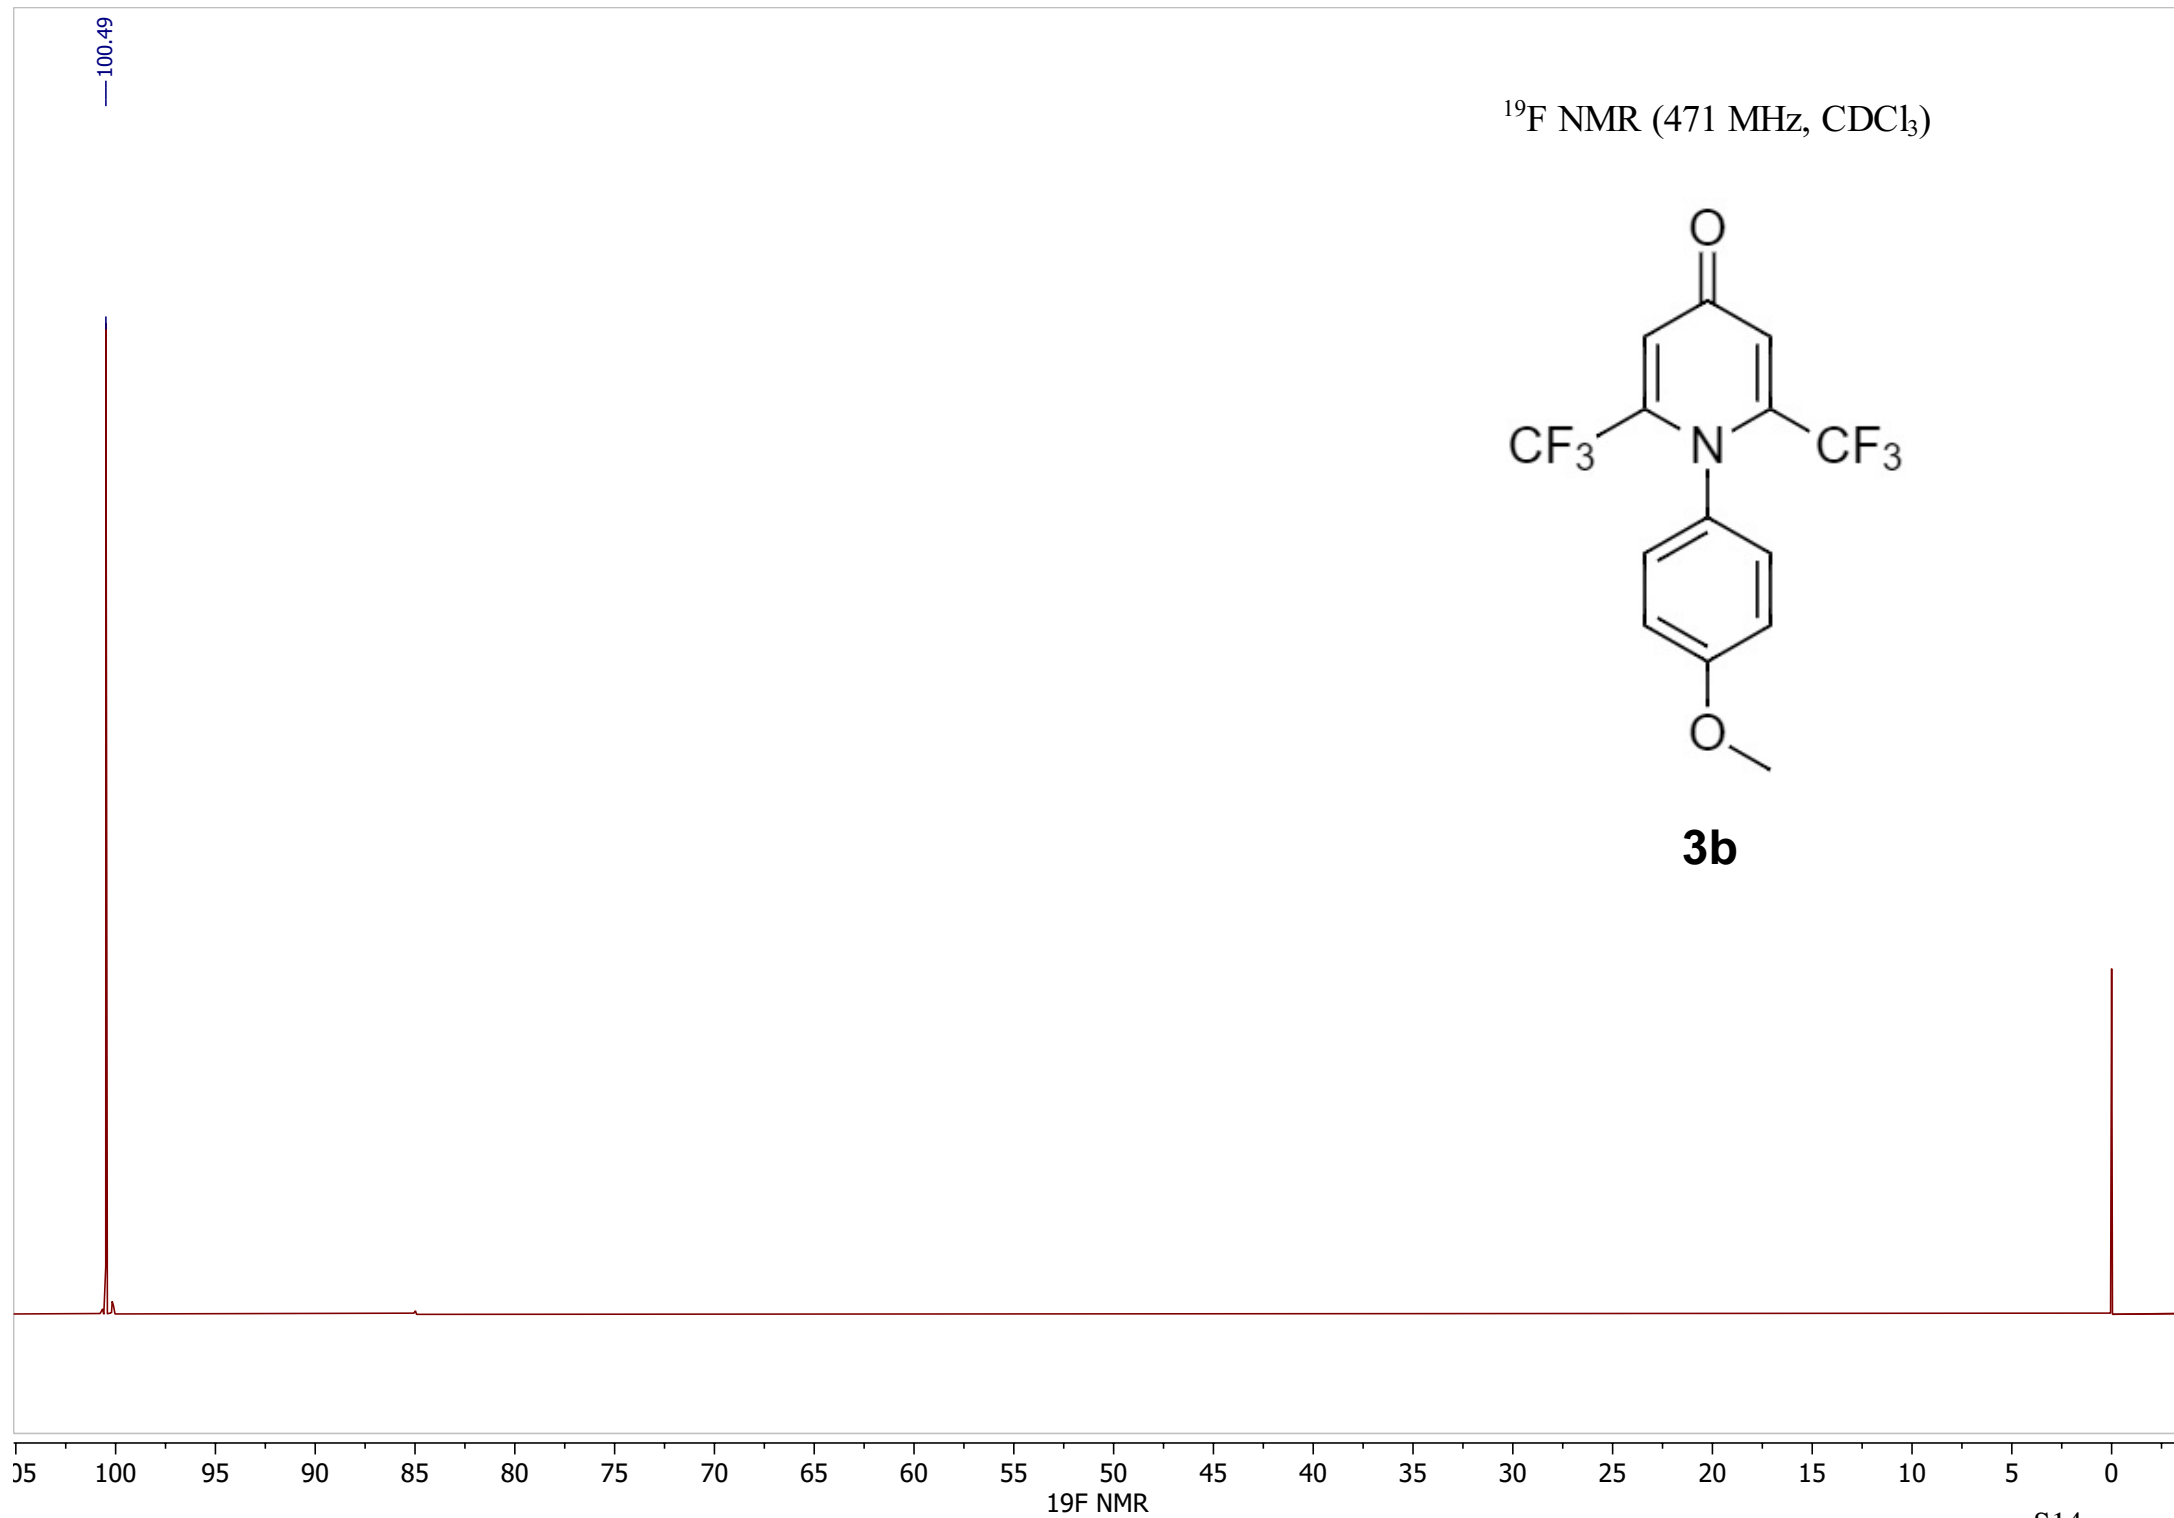

<sup>1</sup>H NMR (500 MHz, CDCl<sub>3</sub>)

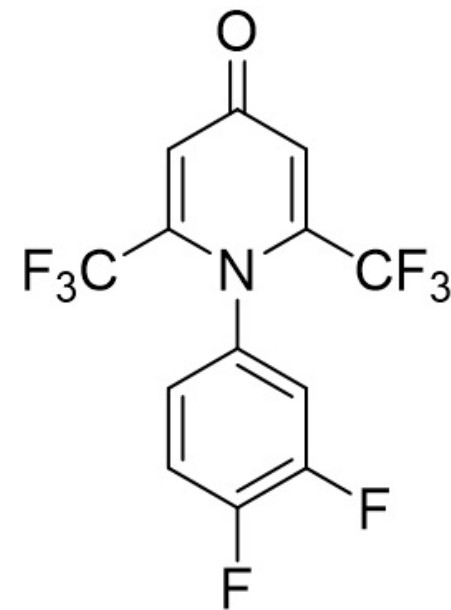

**3c**

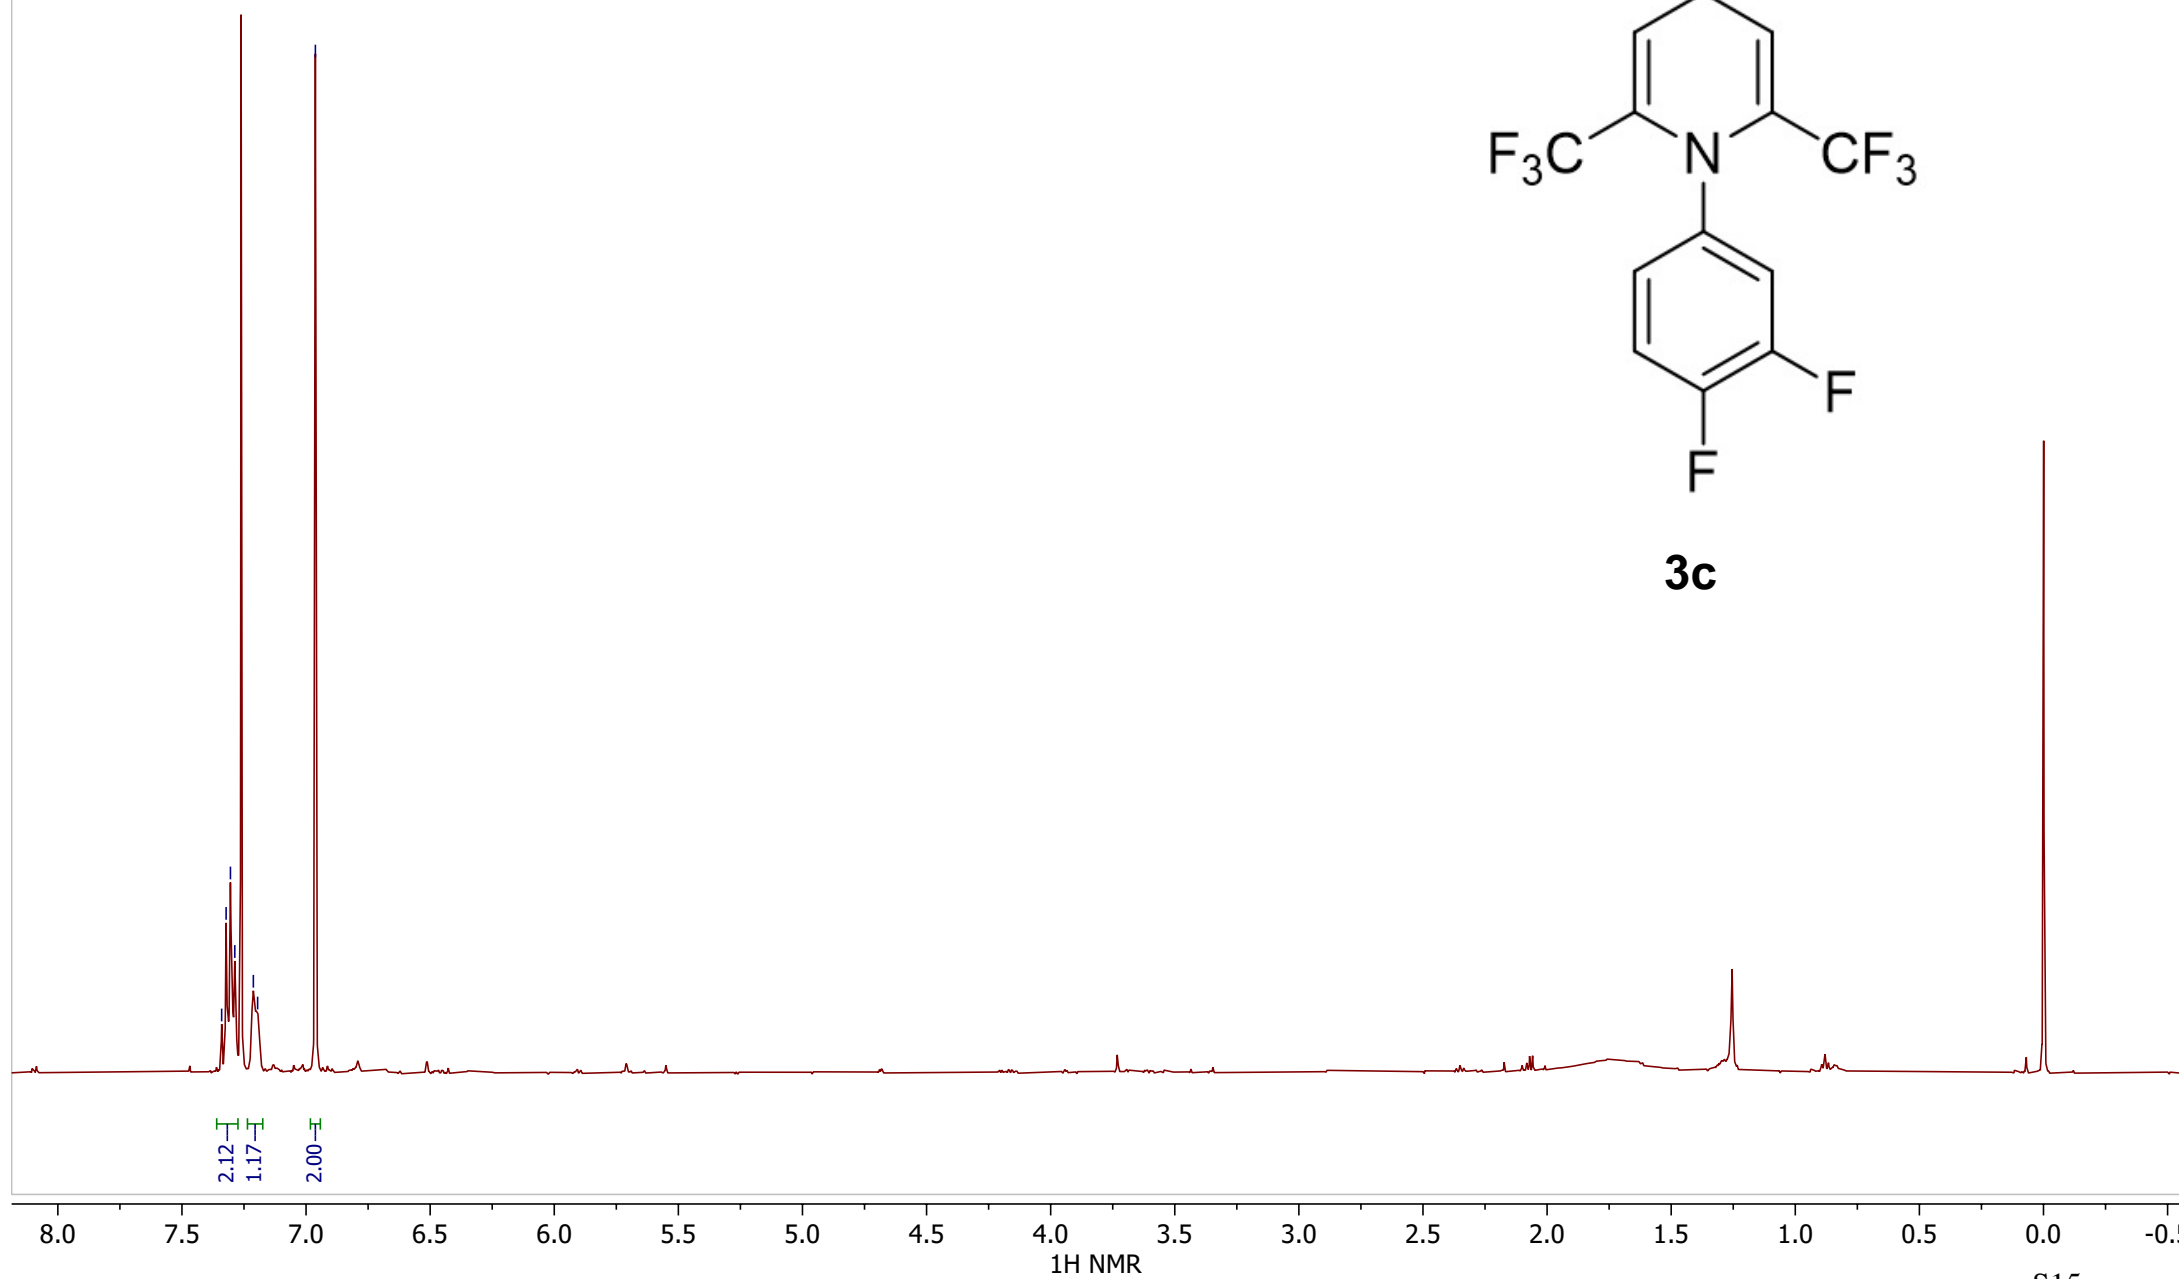

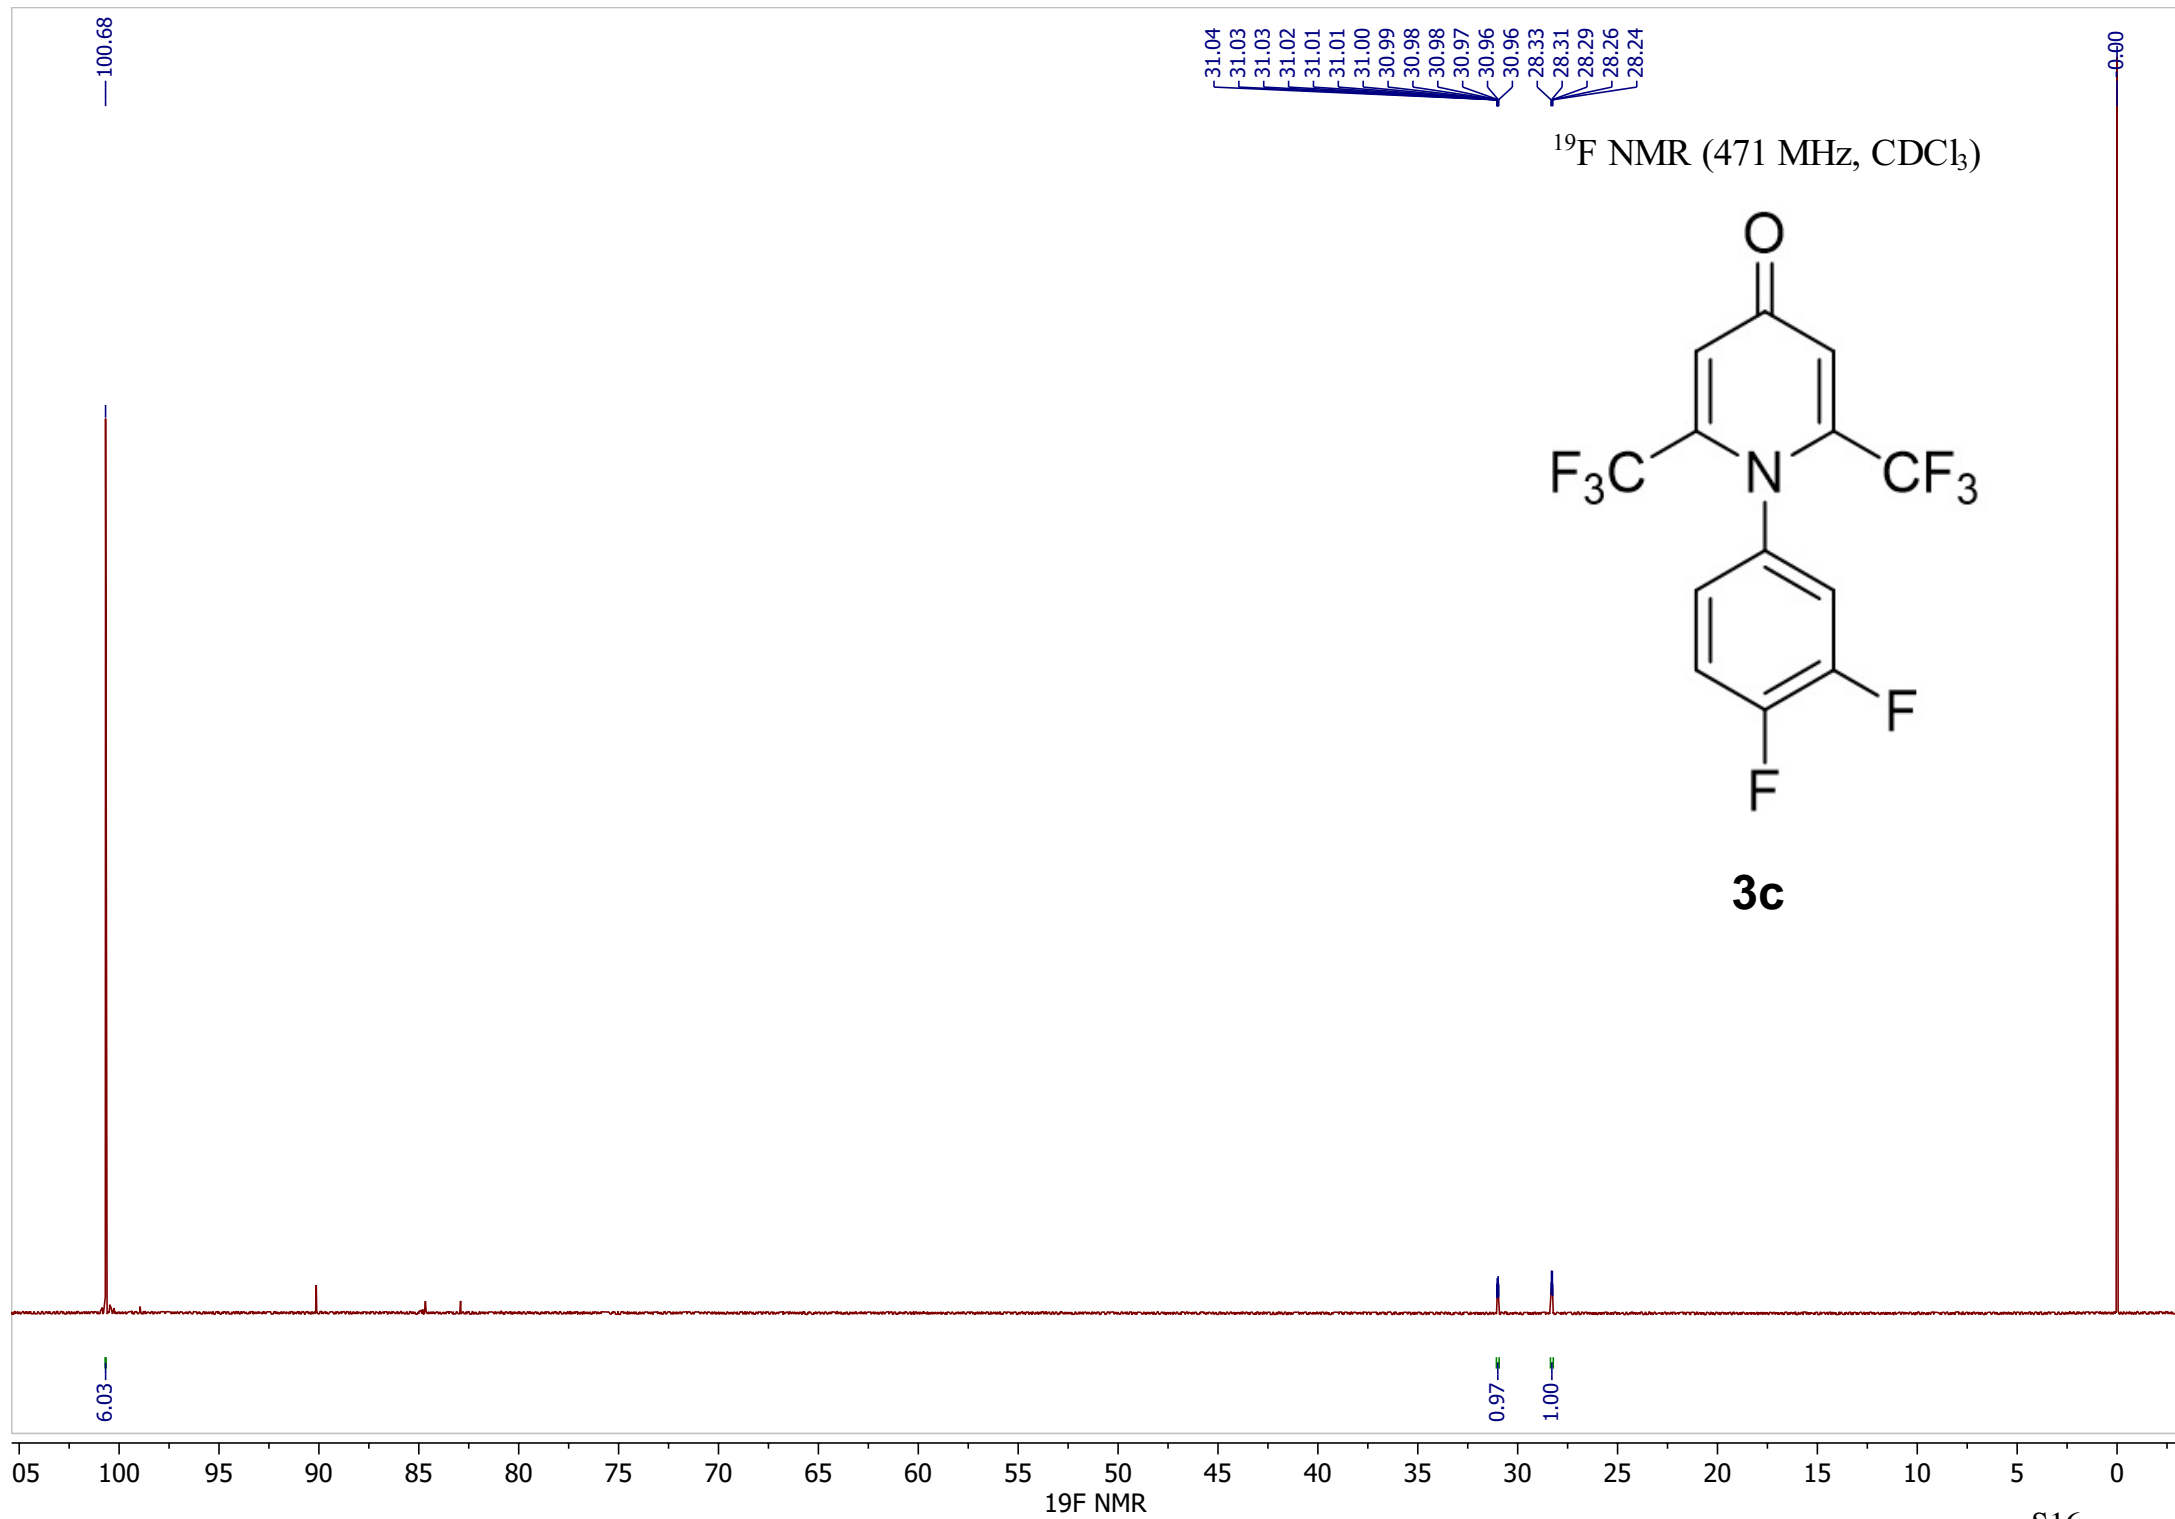



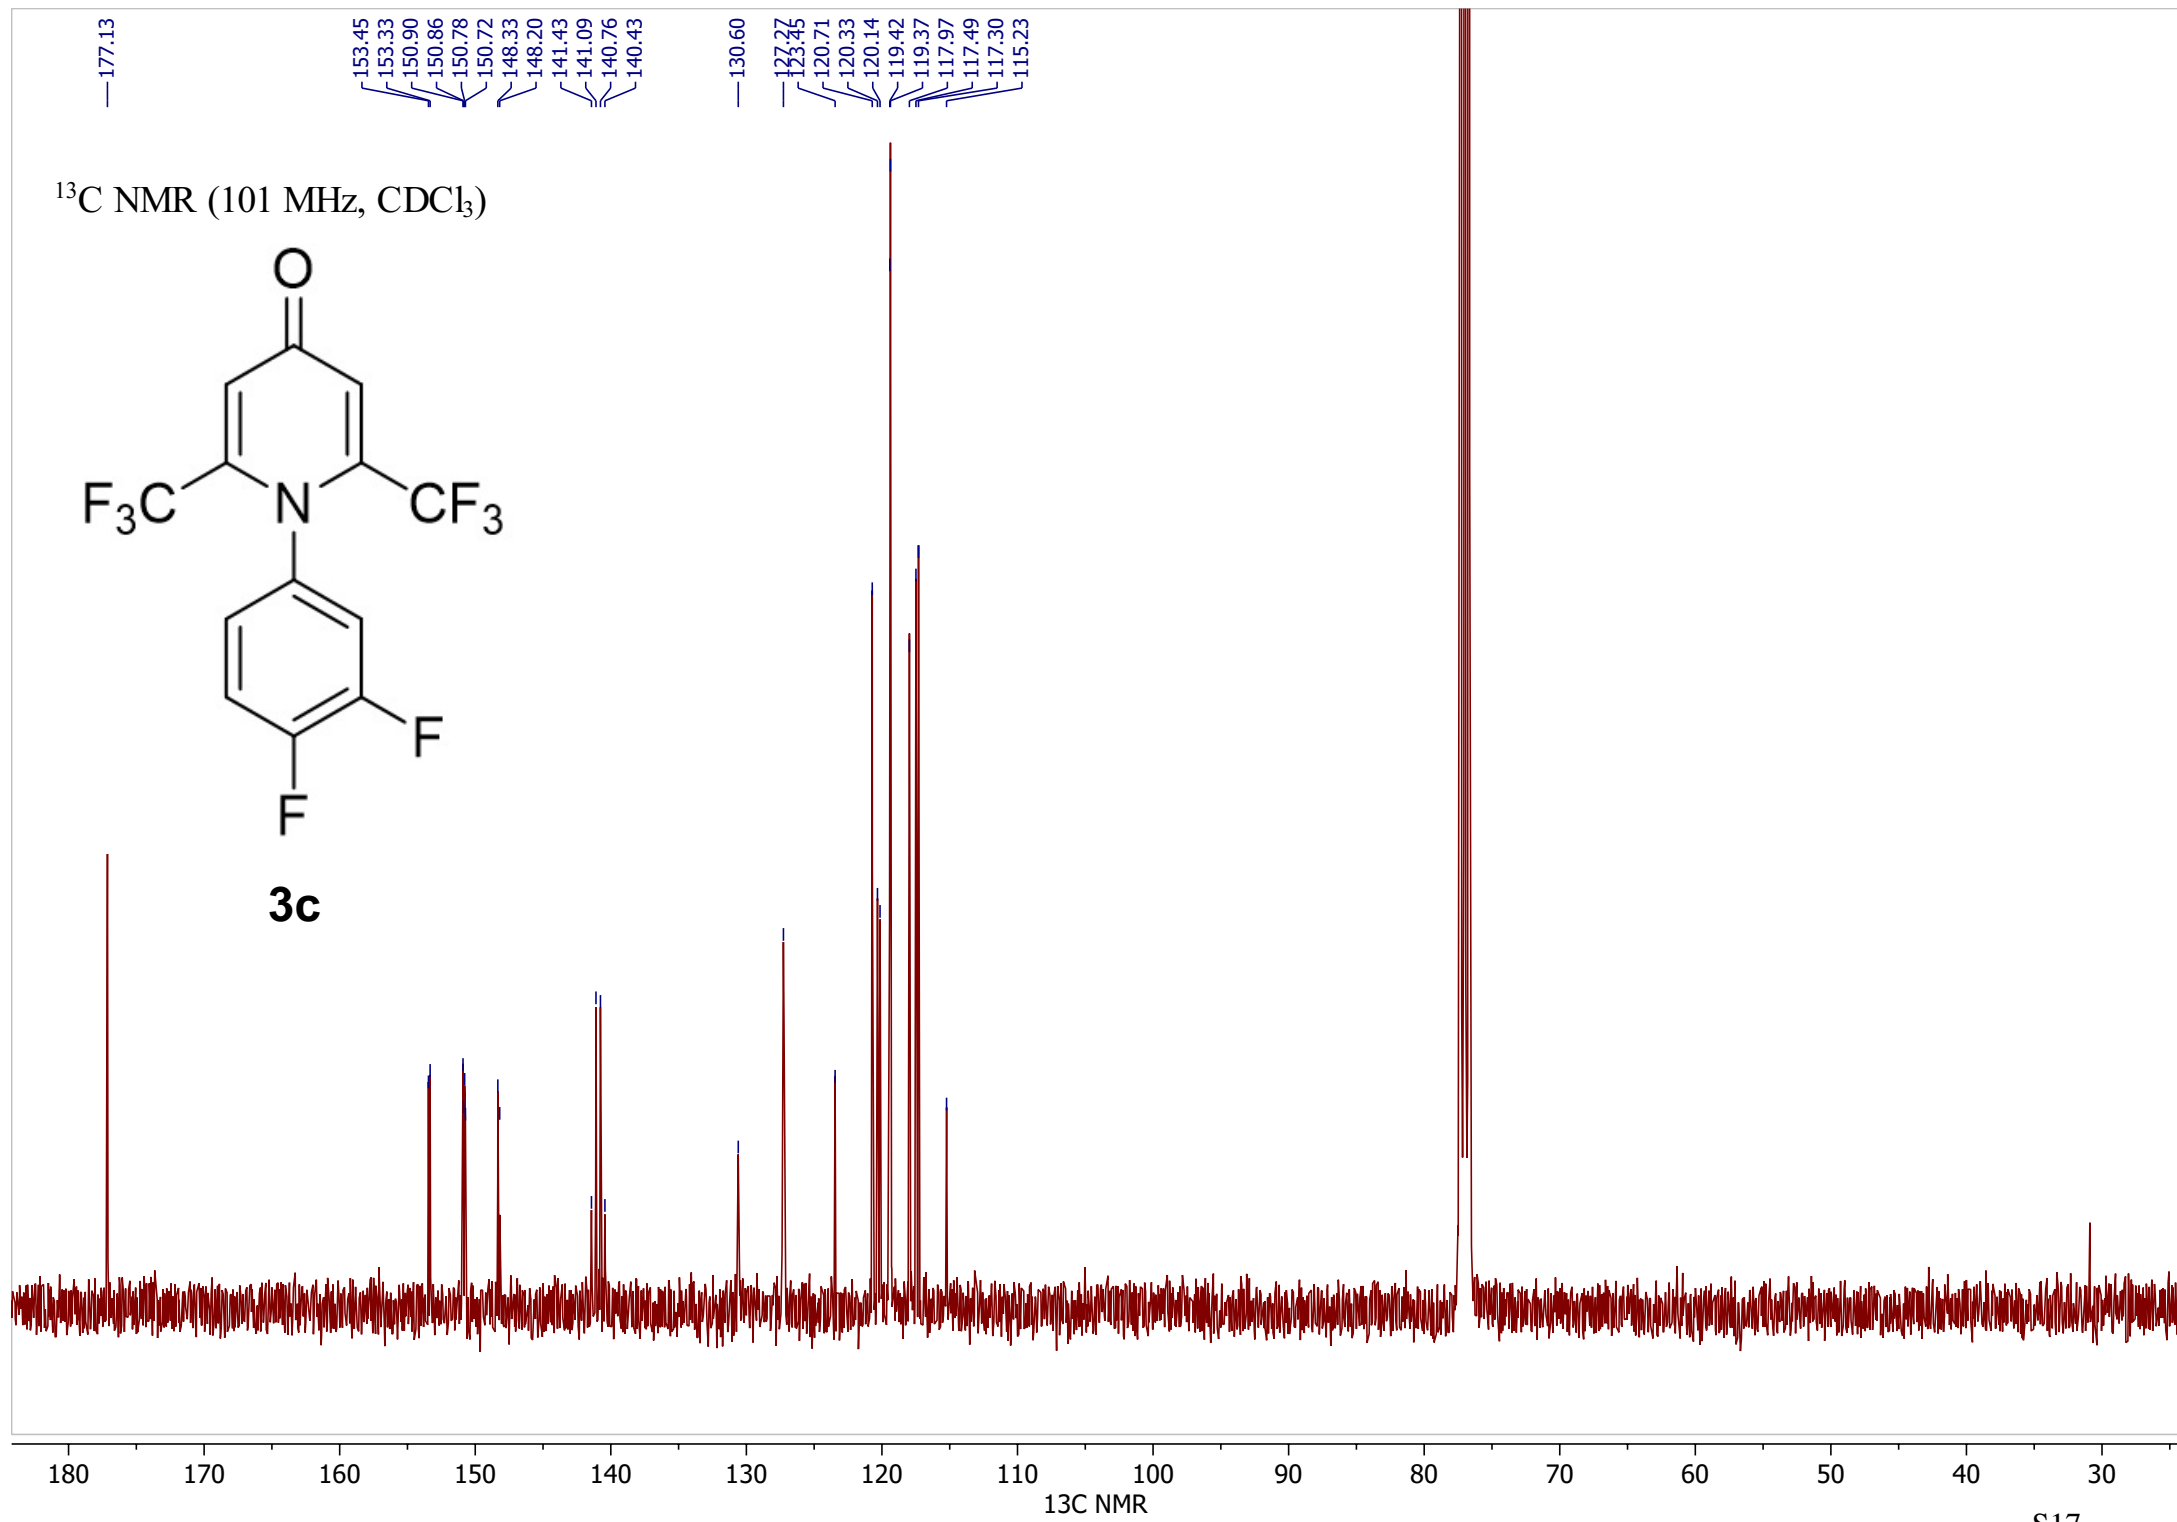

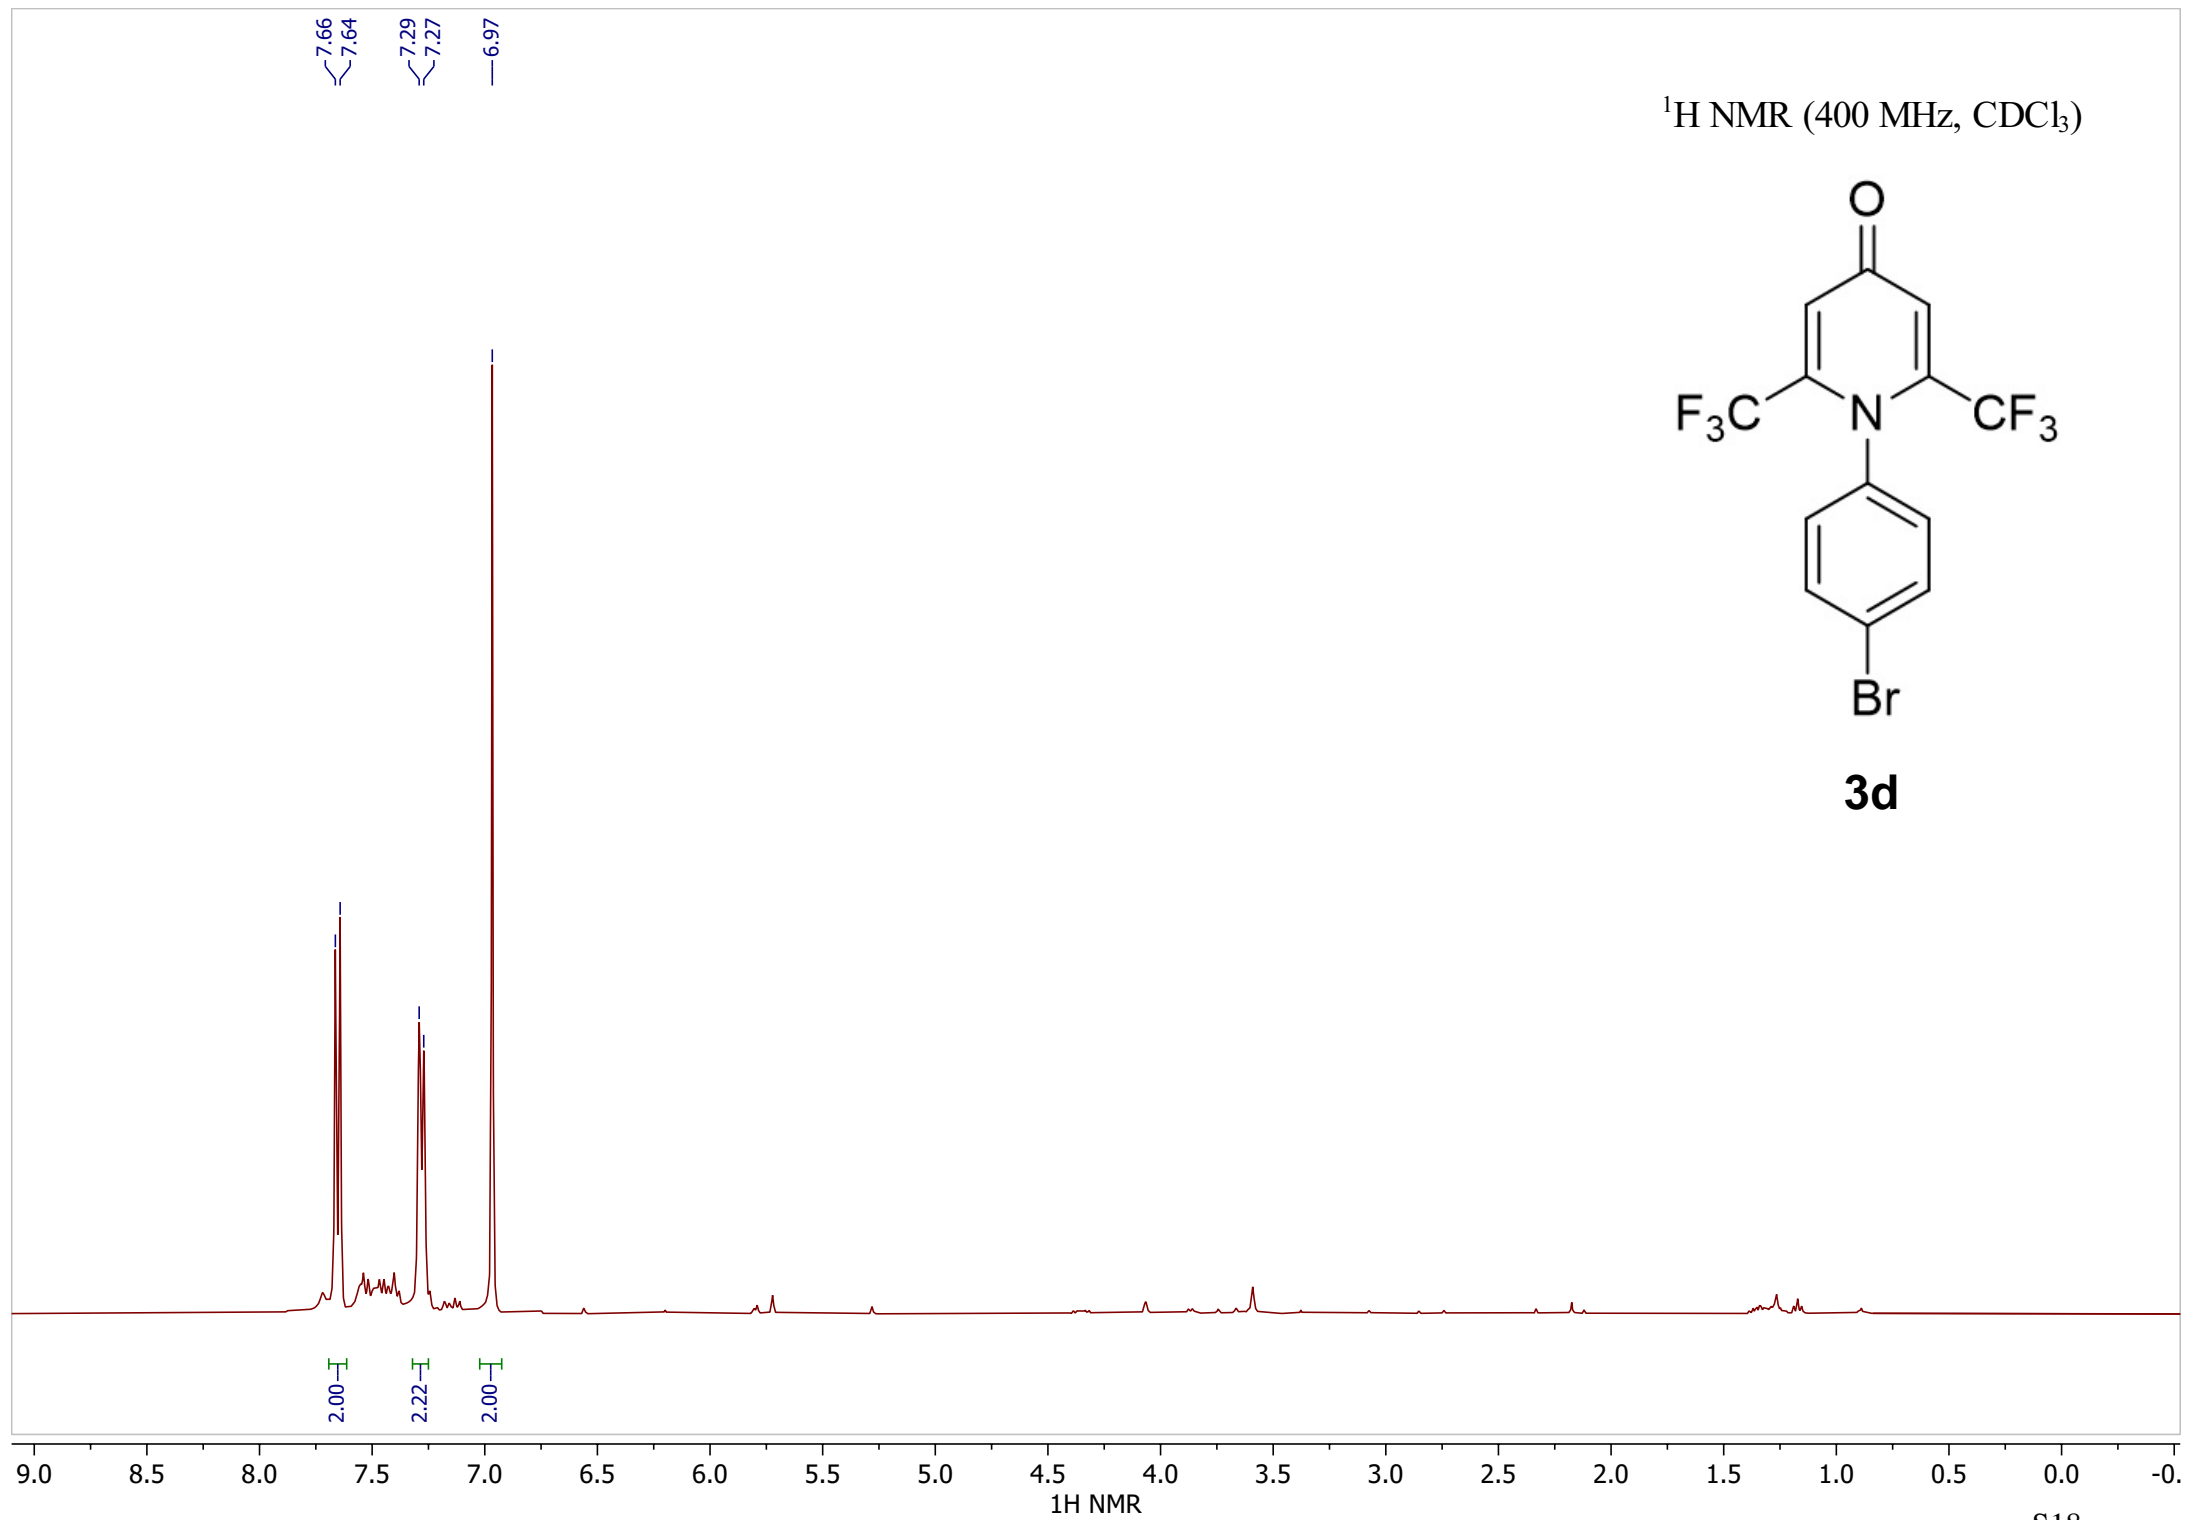

$^{19}\text{F}$  NMR (471 MHz,  $\text{CDCl}_3$ )

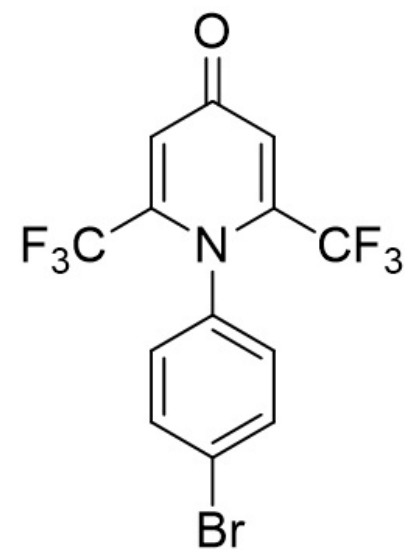

**3d**

—100.72

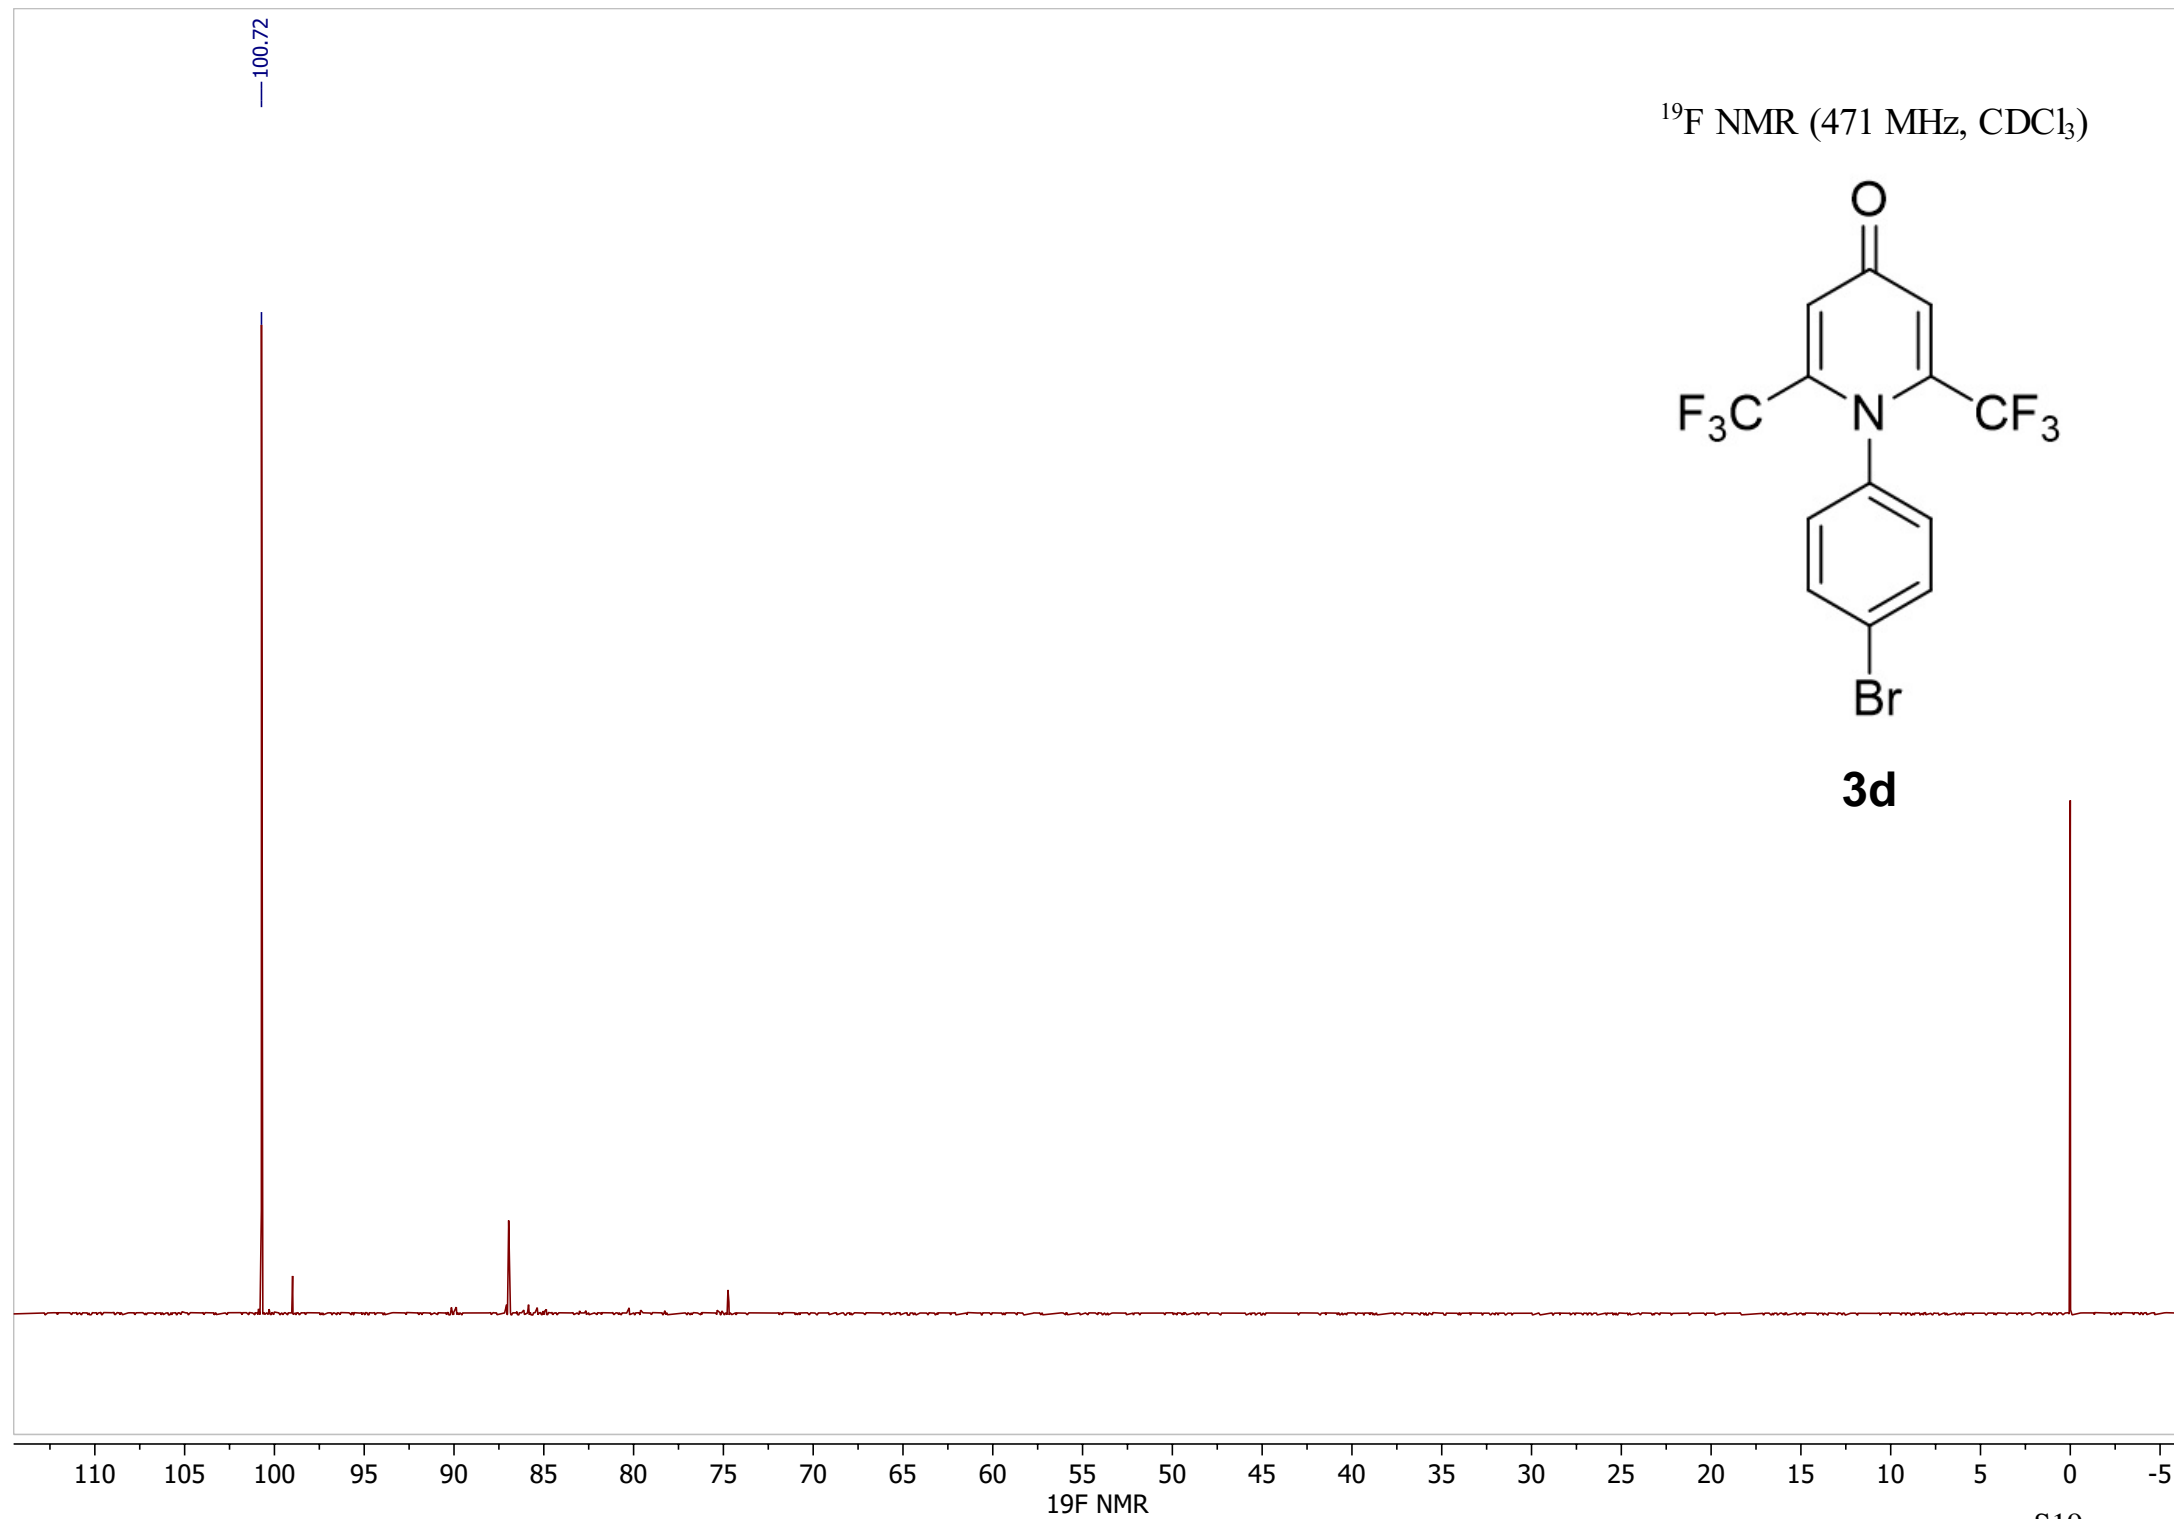

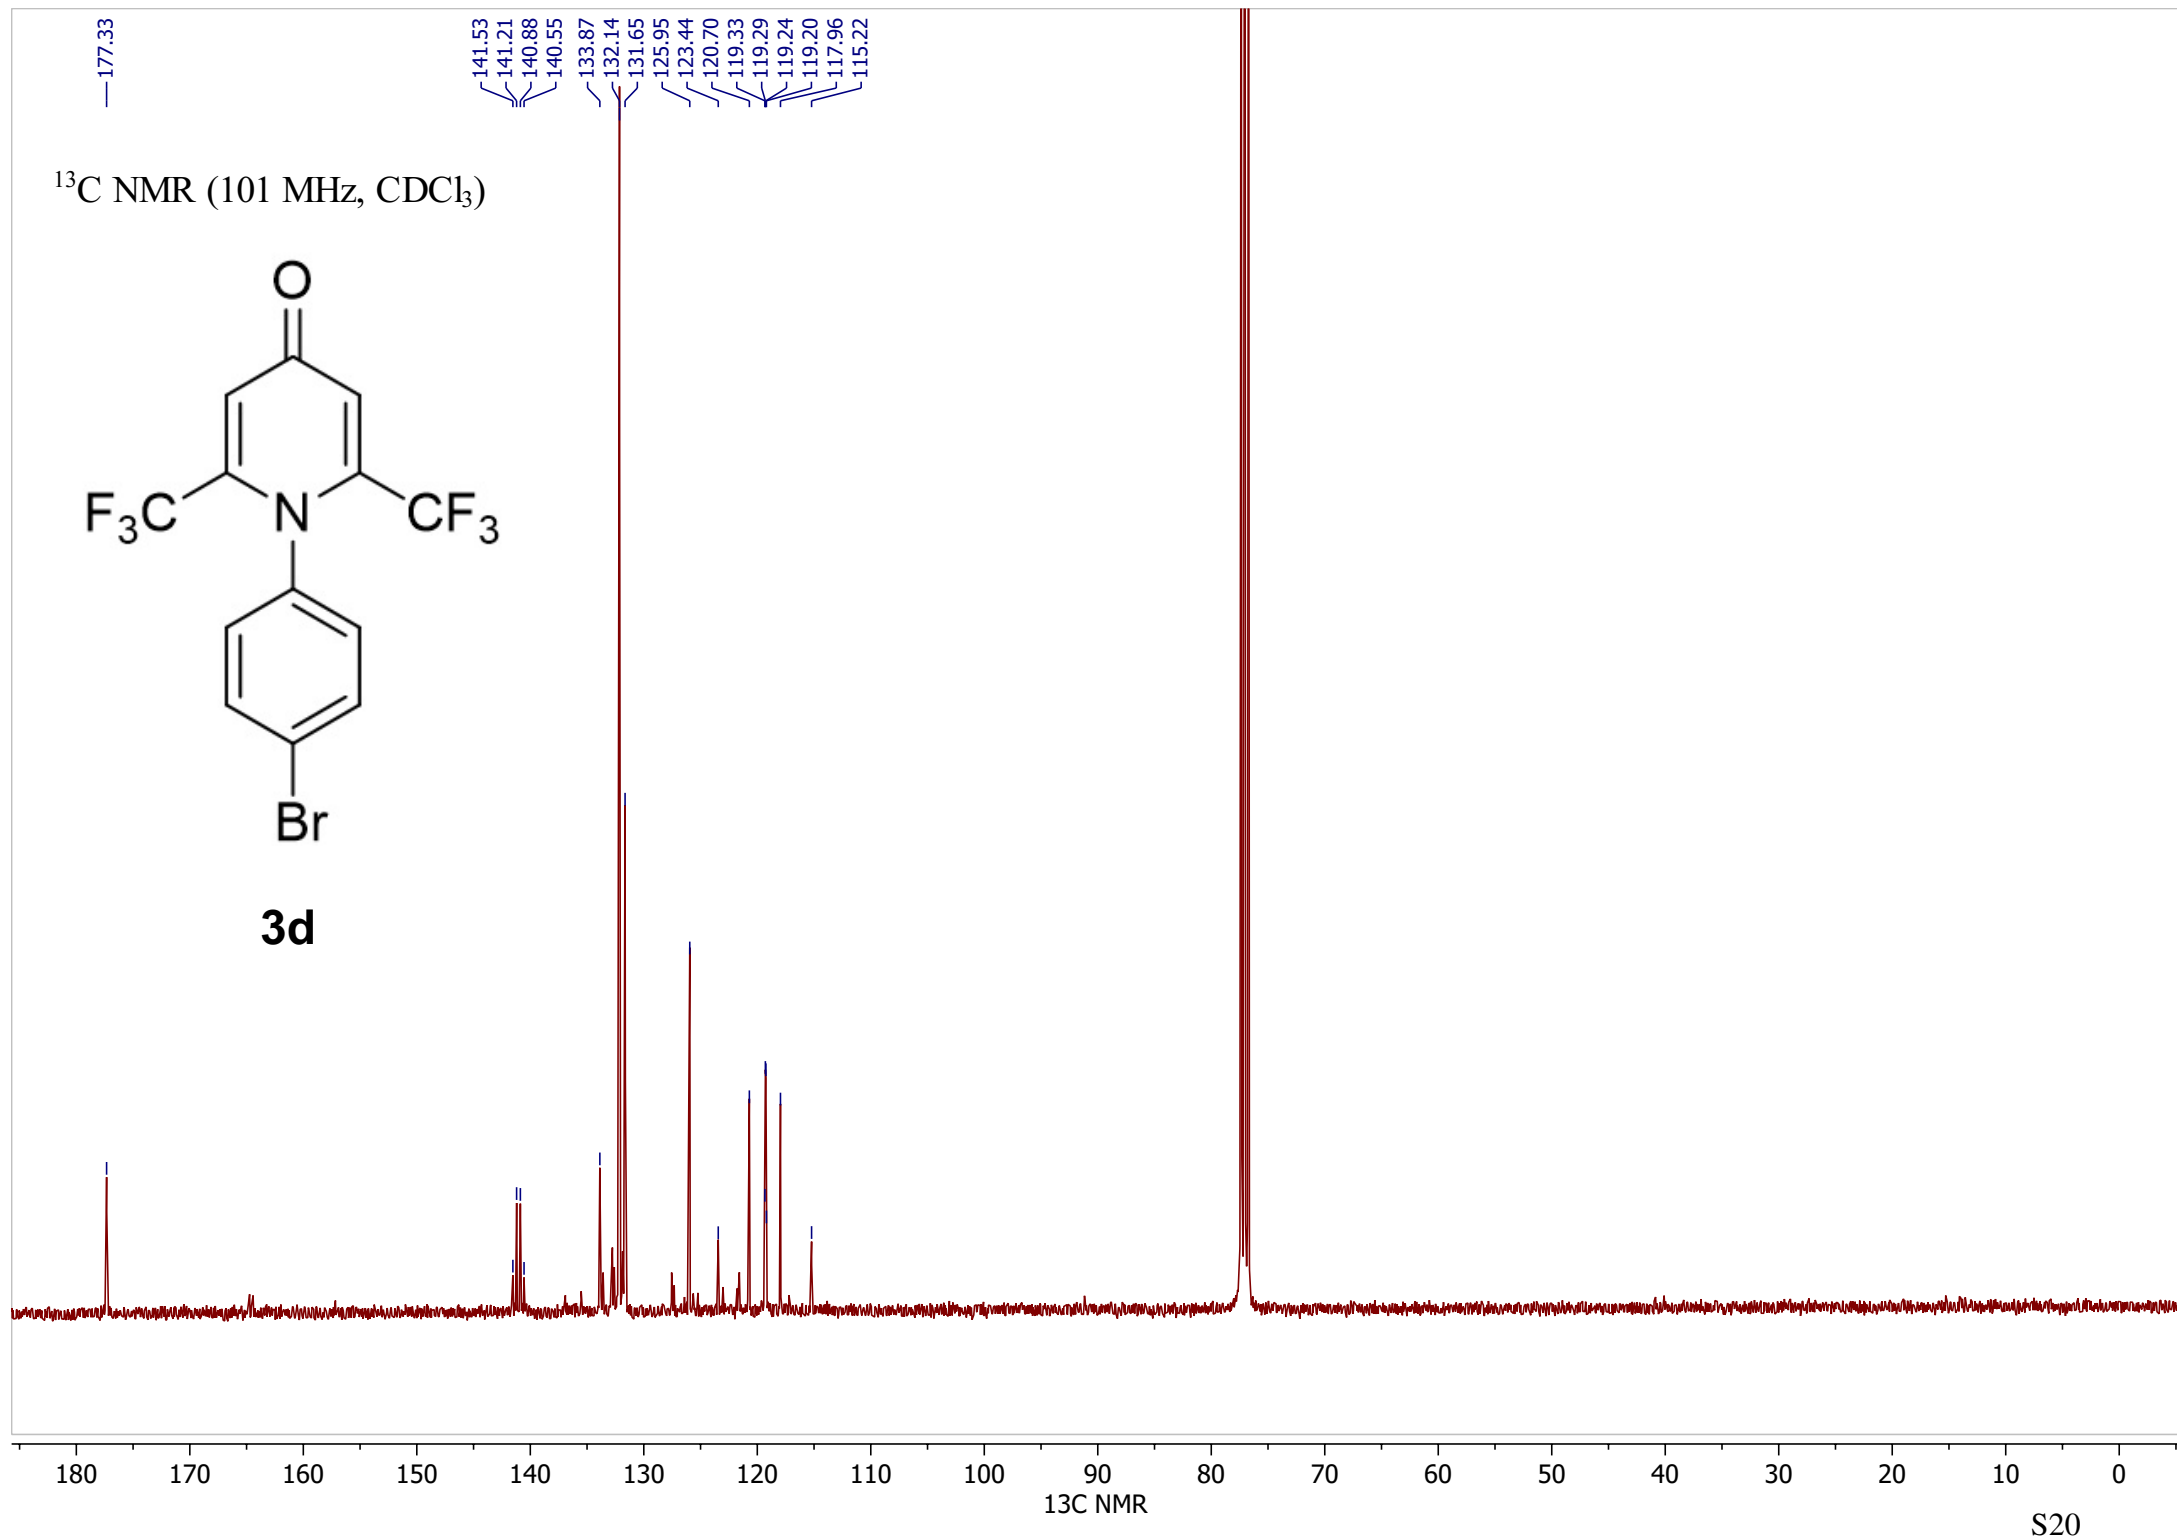

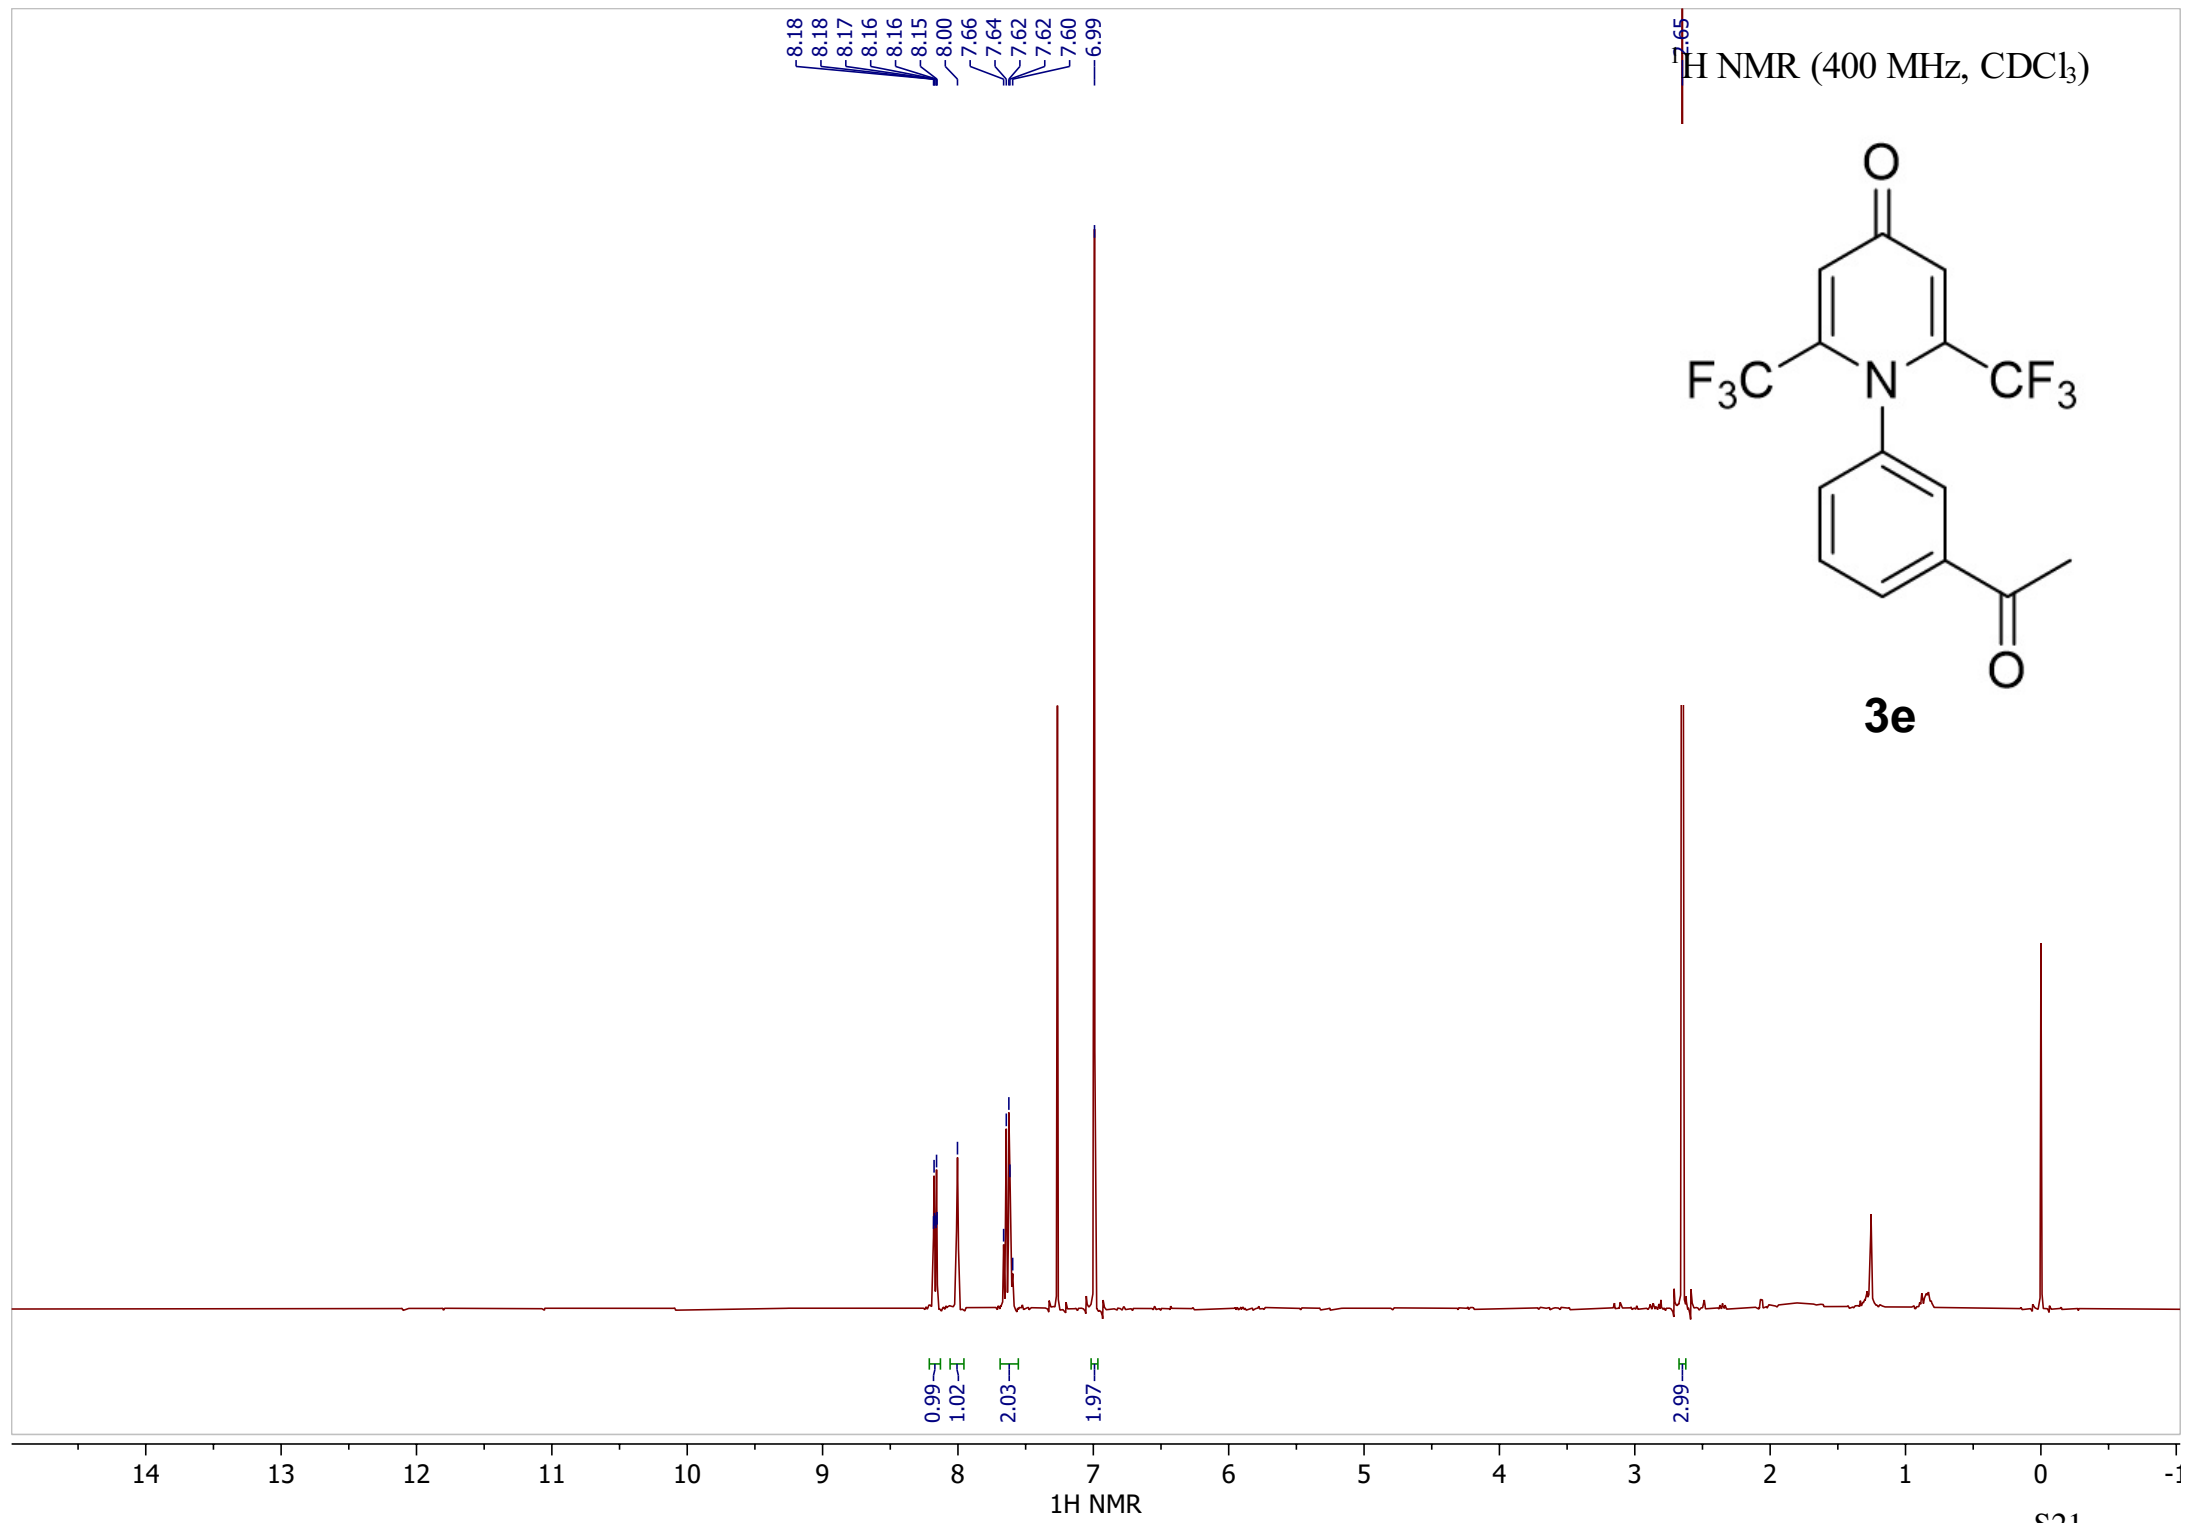

<sup>19</sup>F NMR (376 MHz, CDCl<sub>3</sub>)

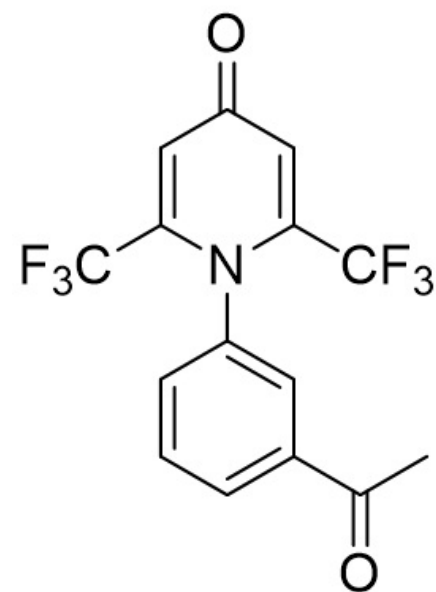

**3e**

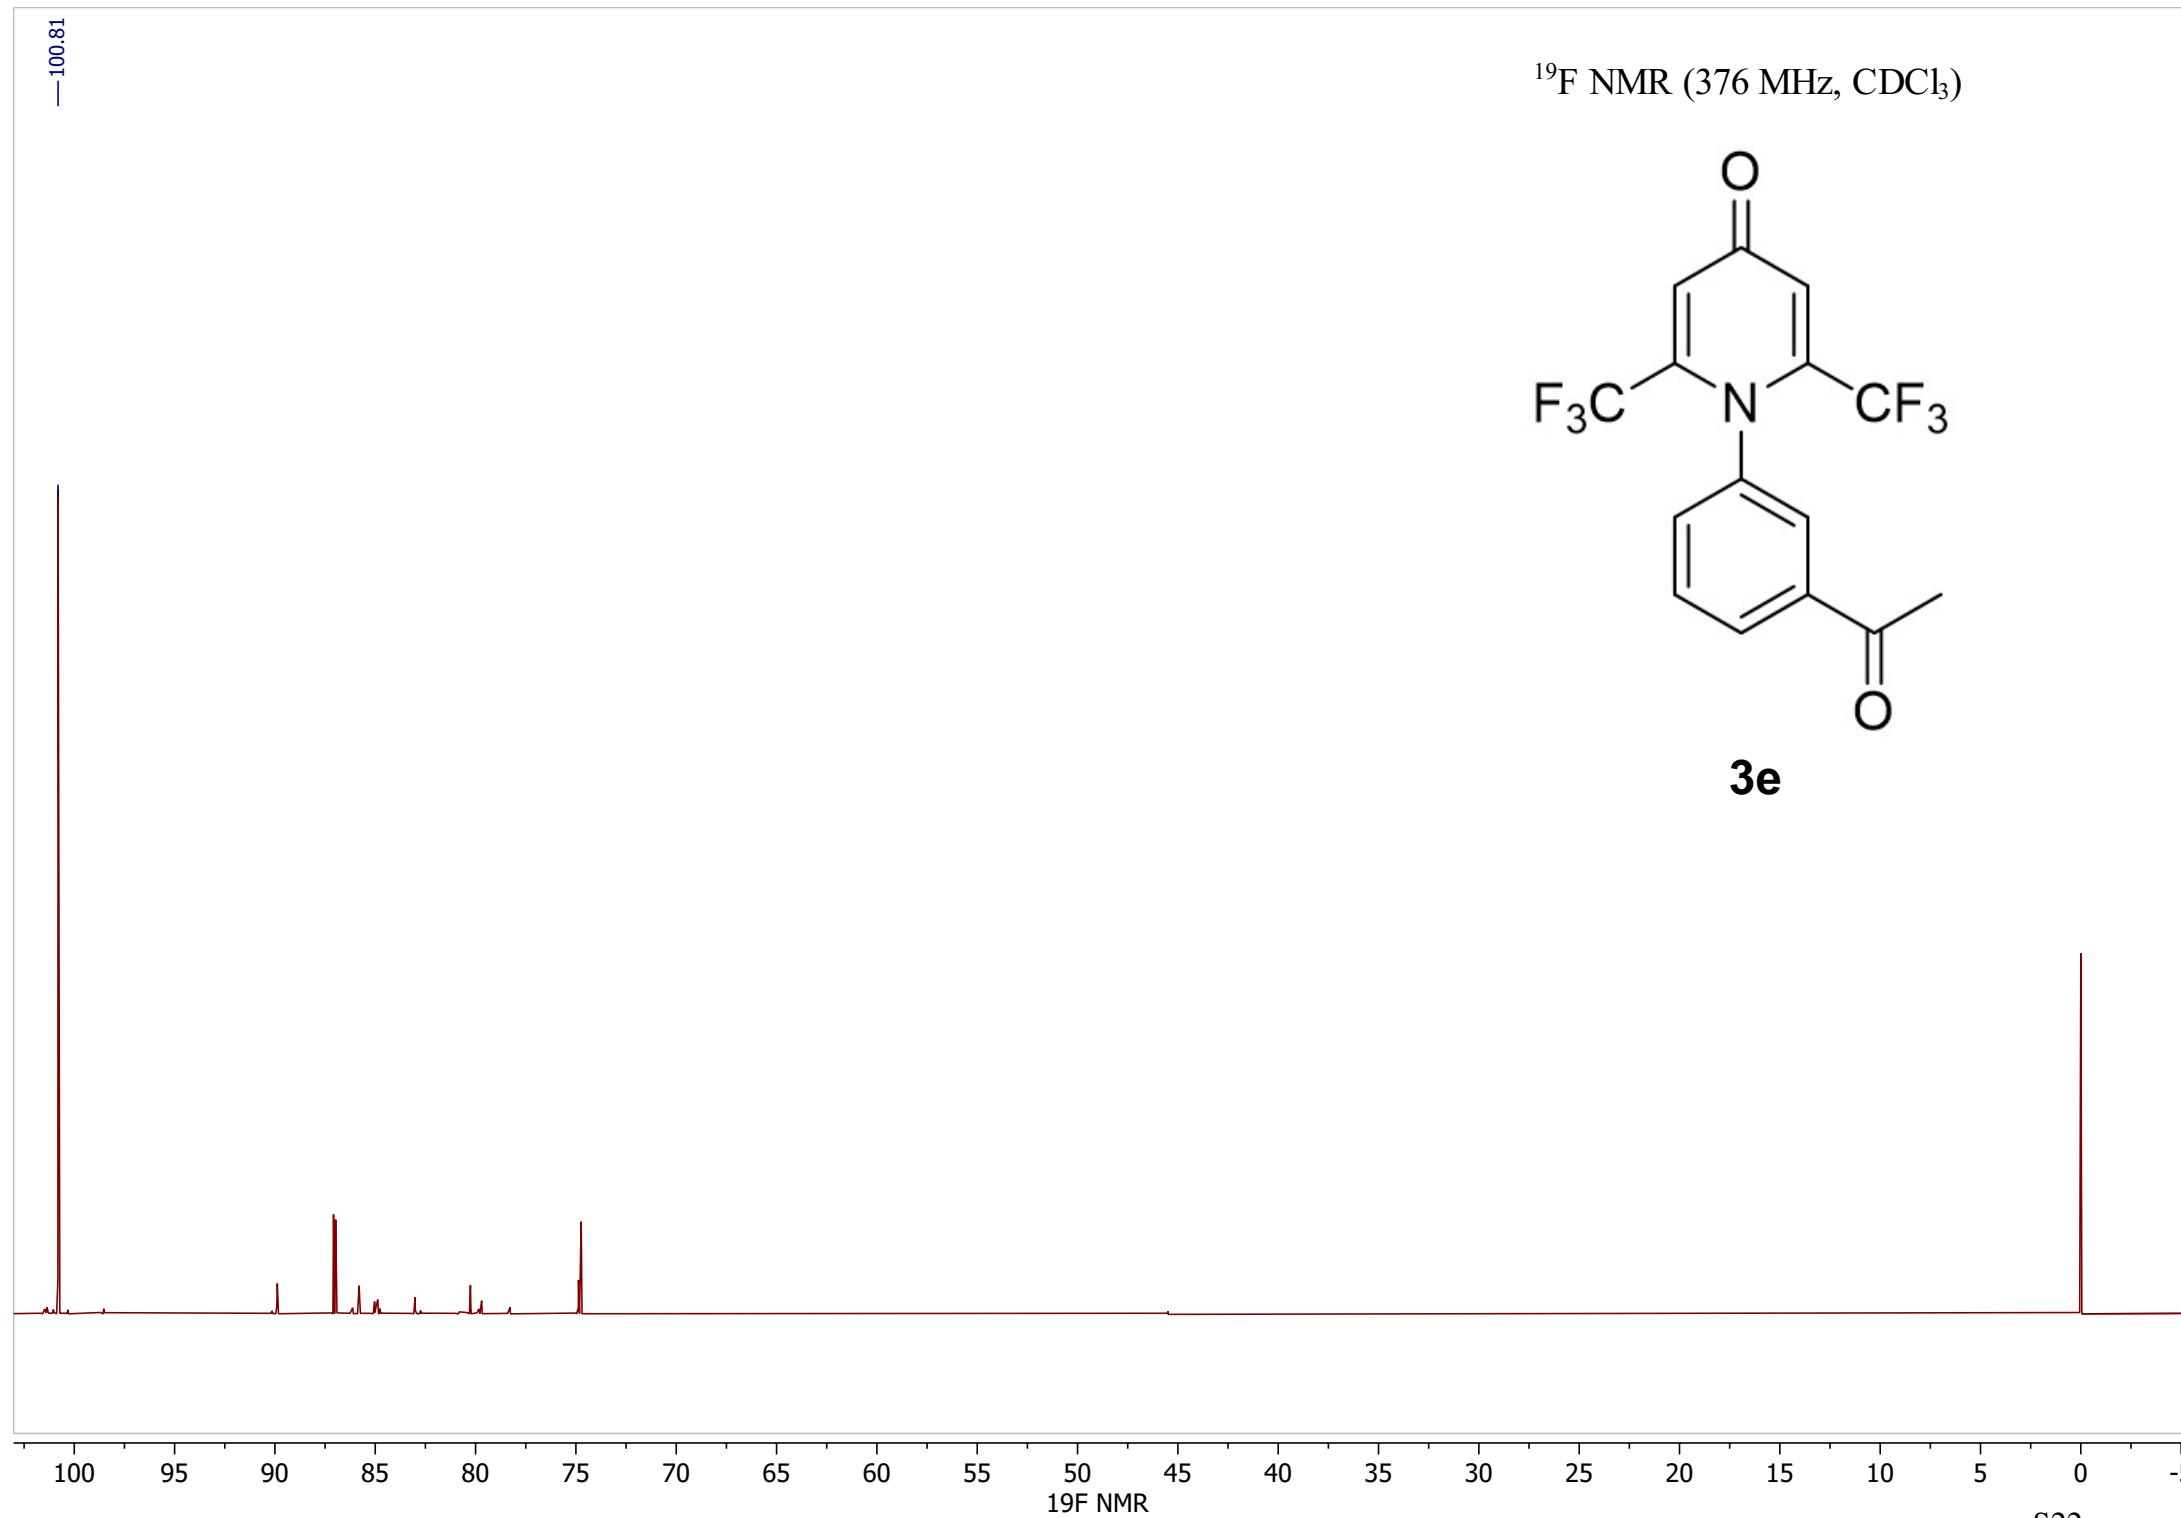

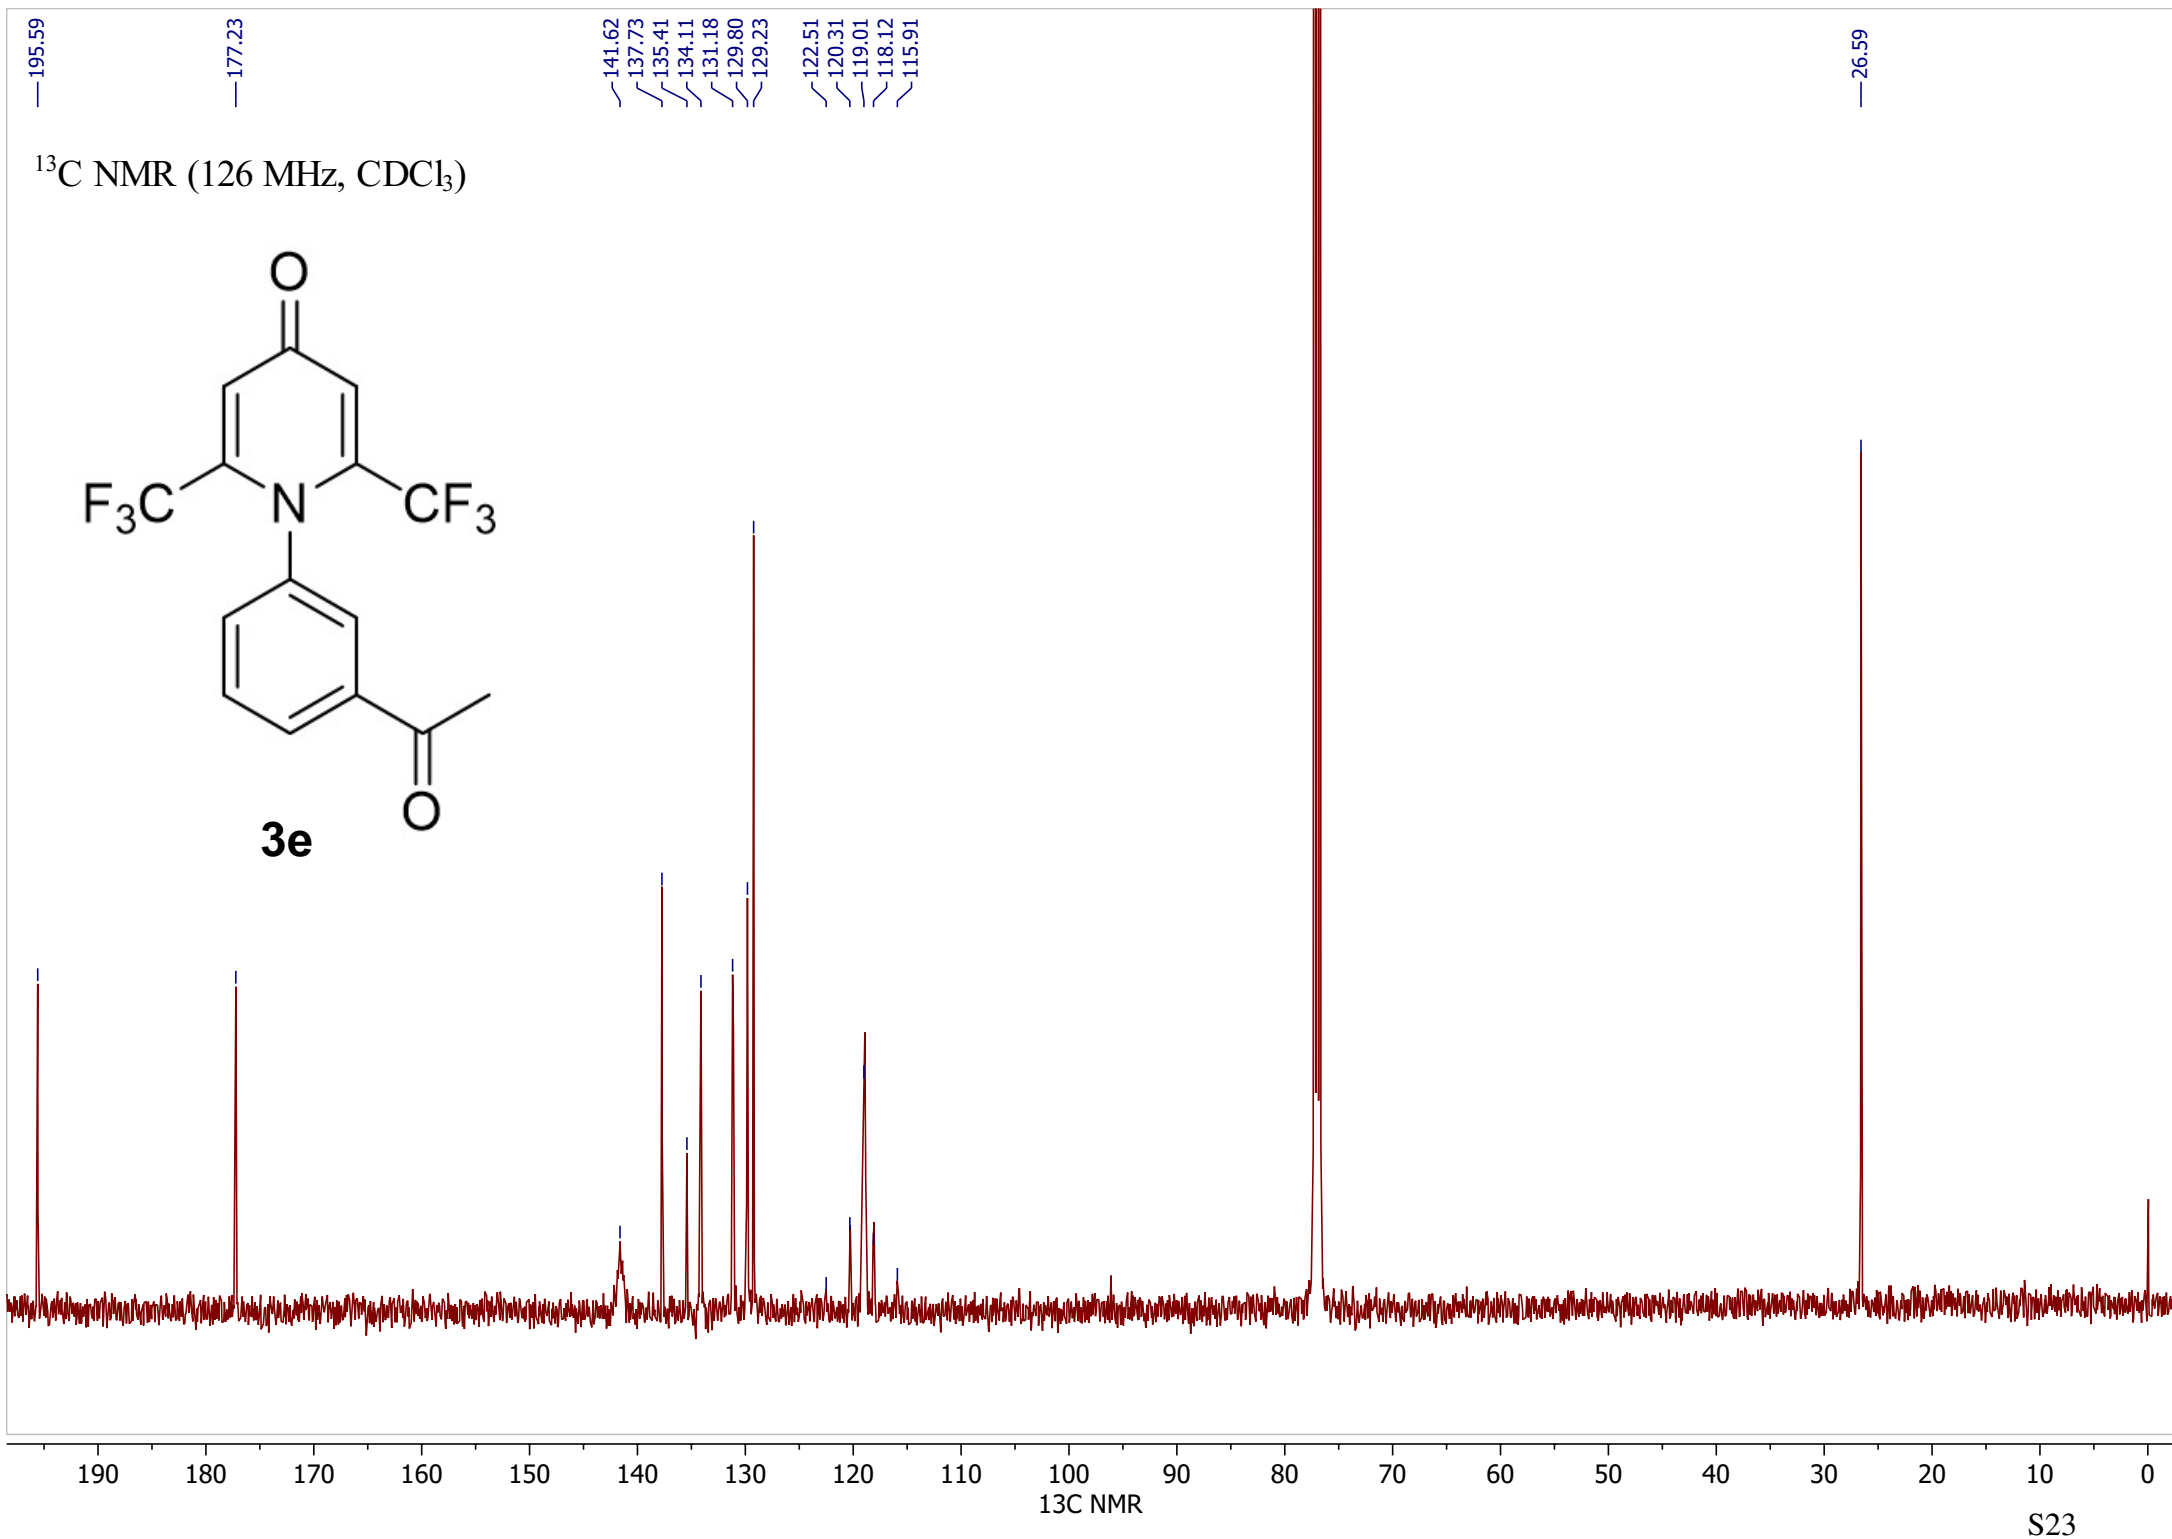

<sup>1</sup>H NMR (600 MHz, CDCl<sub>3</sub>)

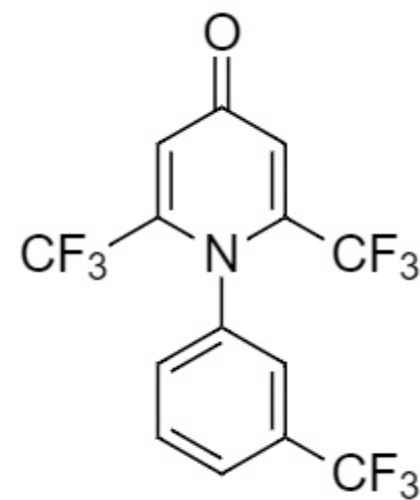

**3f**

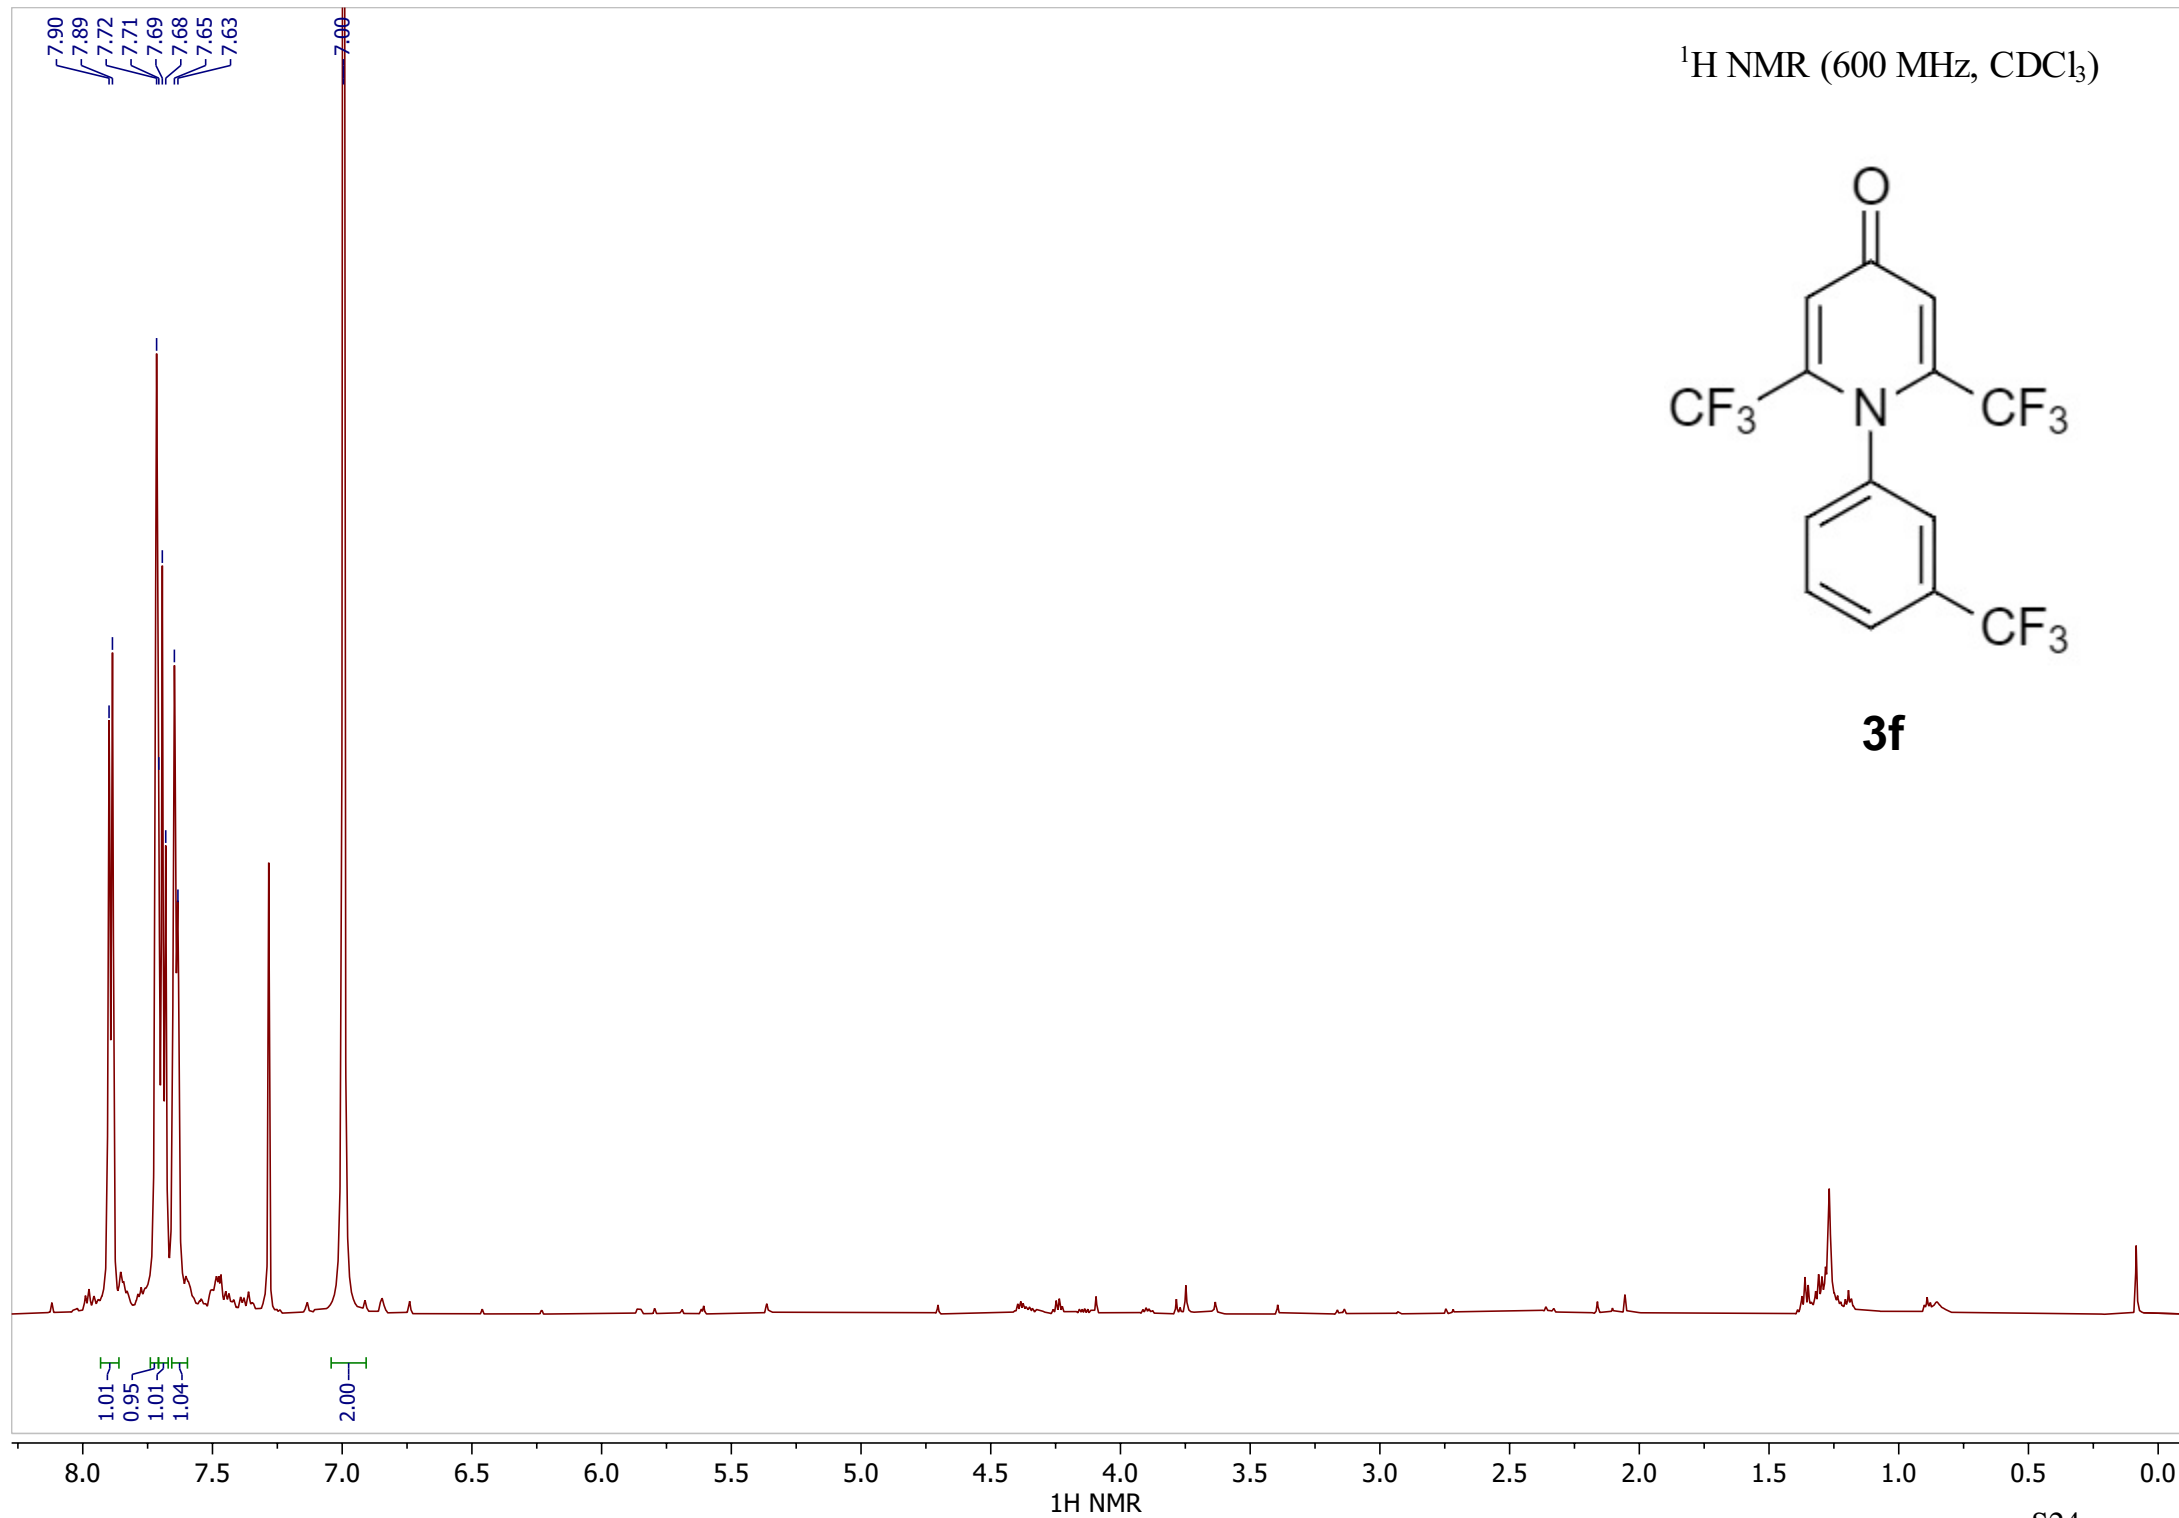



$^{19}\text{F}$  NMR (376 MHz,  $\text{CDCl}_3$ )

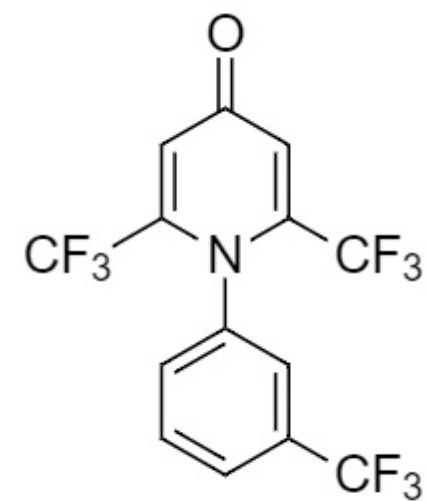

**3f**

100.70  
98.75

6.00  
3.00

$^{19}\text{F}$  NMR

S25

$^{13}\text{C}$  NMR (151 MHz,  $\text{CDCl}_3$ )

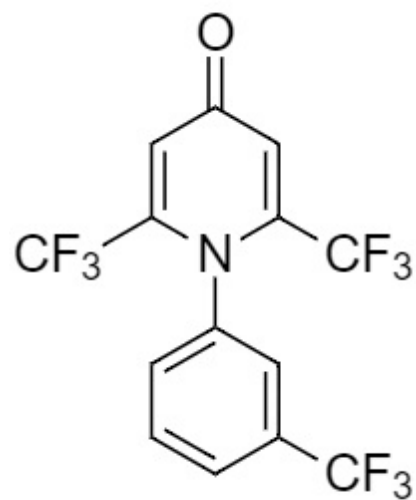

**3f**

177.18

141.19  
140.97  
140.75  
140.53  
135.44  
133.65  
132.10  
131.87  
131.65  
131.43  
129.59  
128.26  
127.56  
125.59  
123.79  
122.05  
121.98  
120.22  
120.17  
119.40  
119.37  
118.39  
116.57

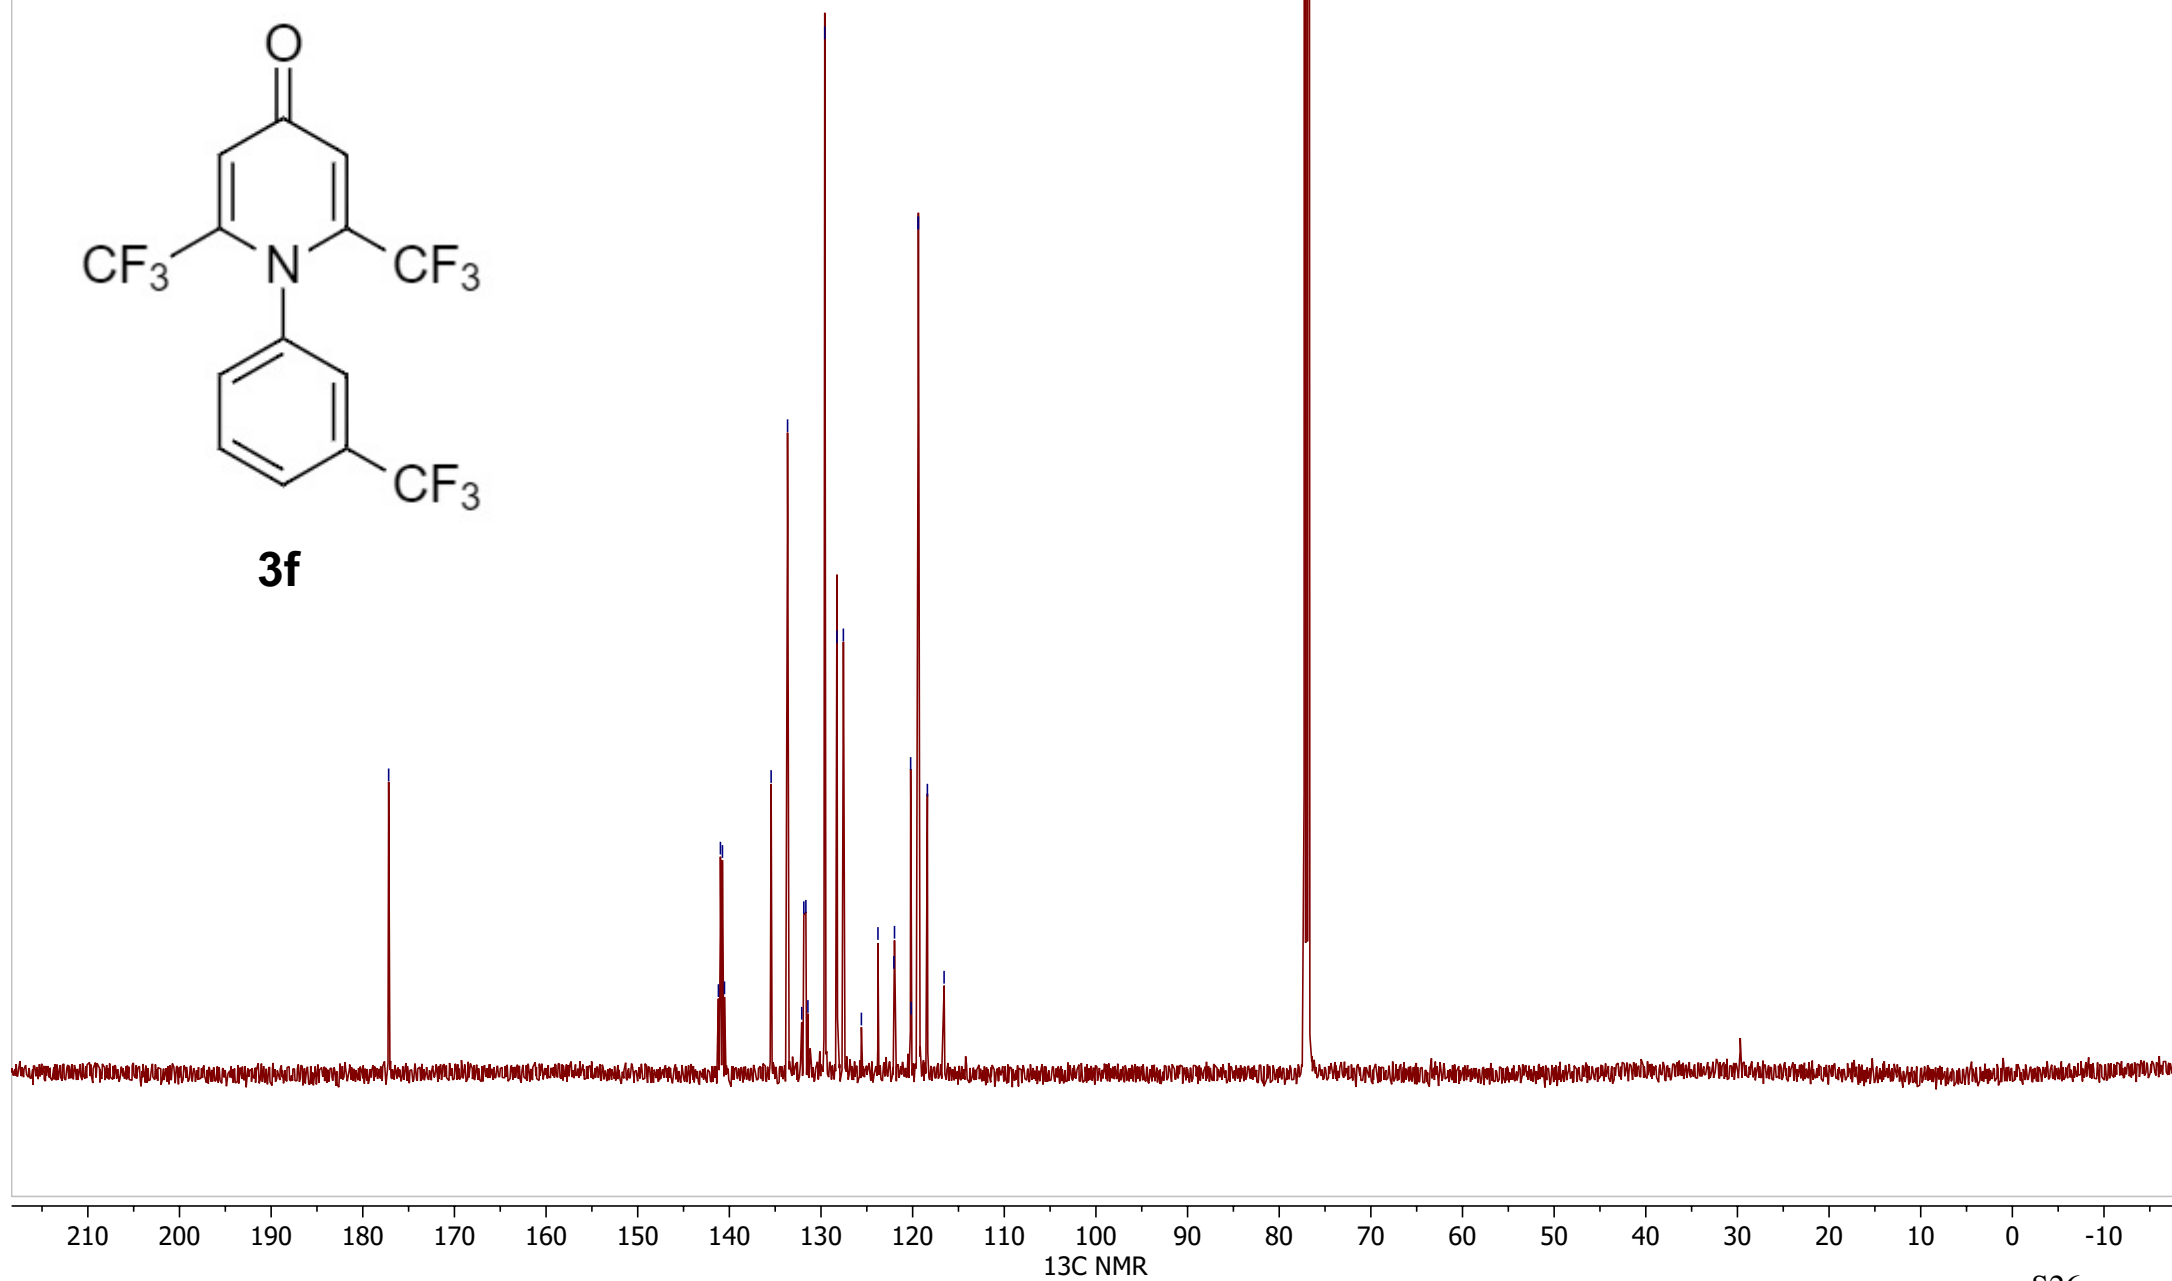

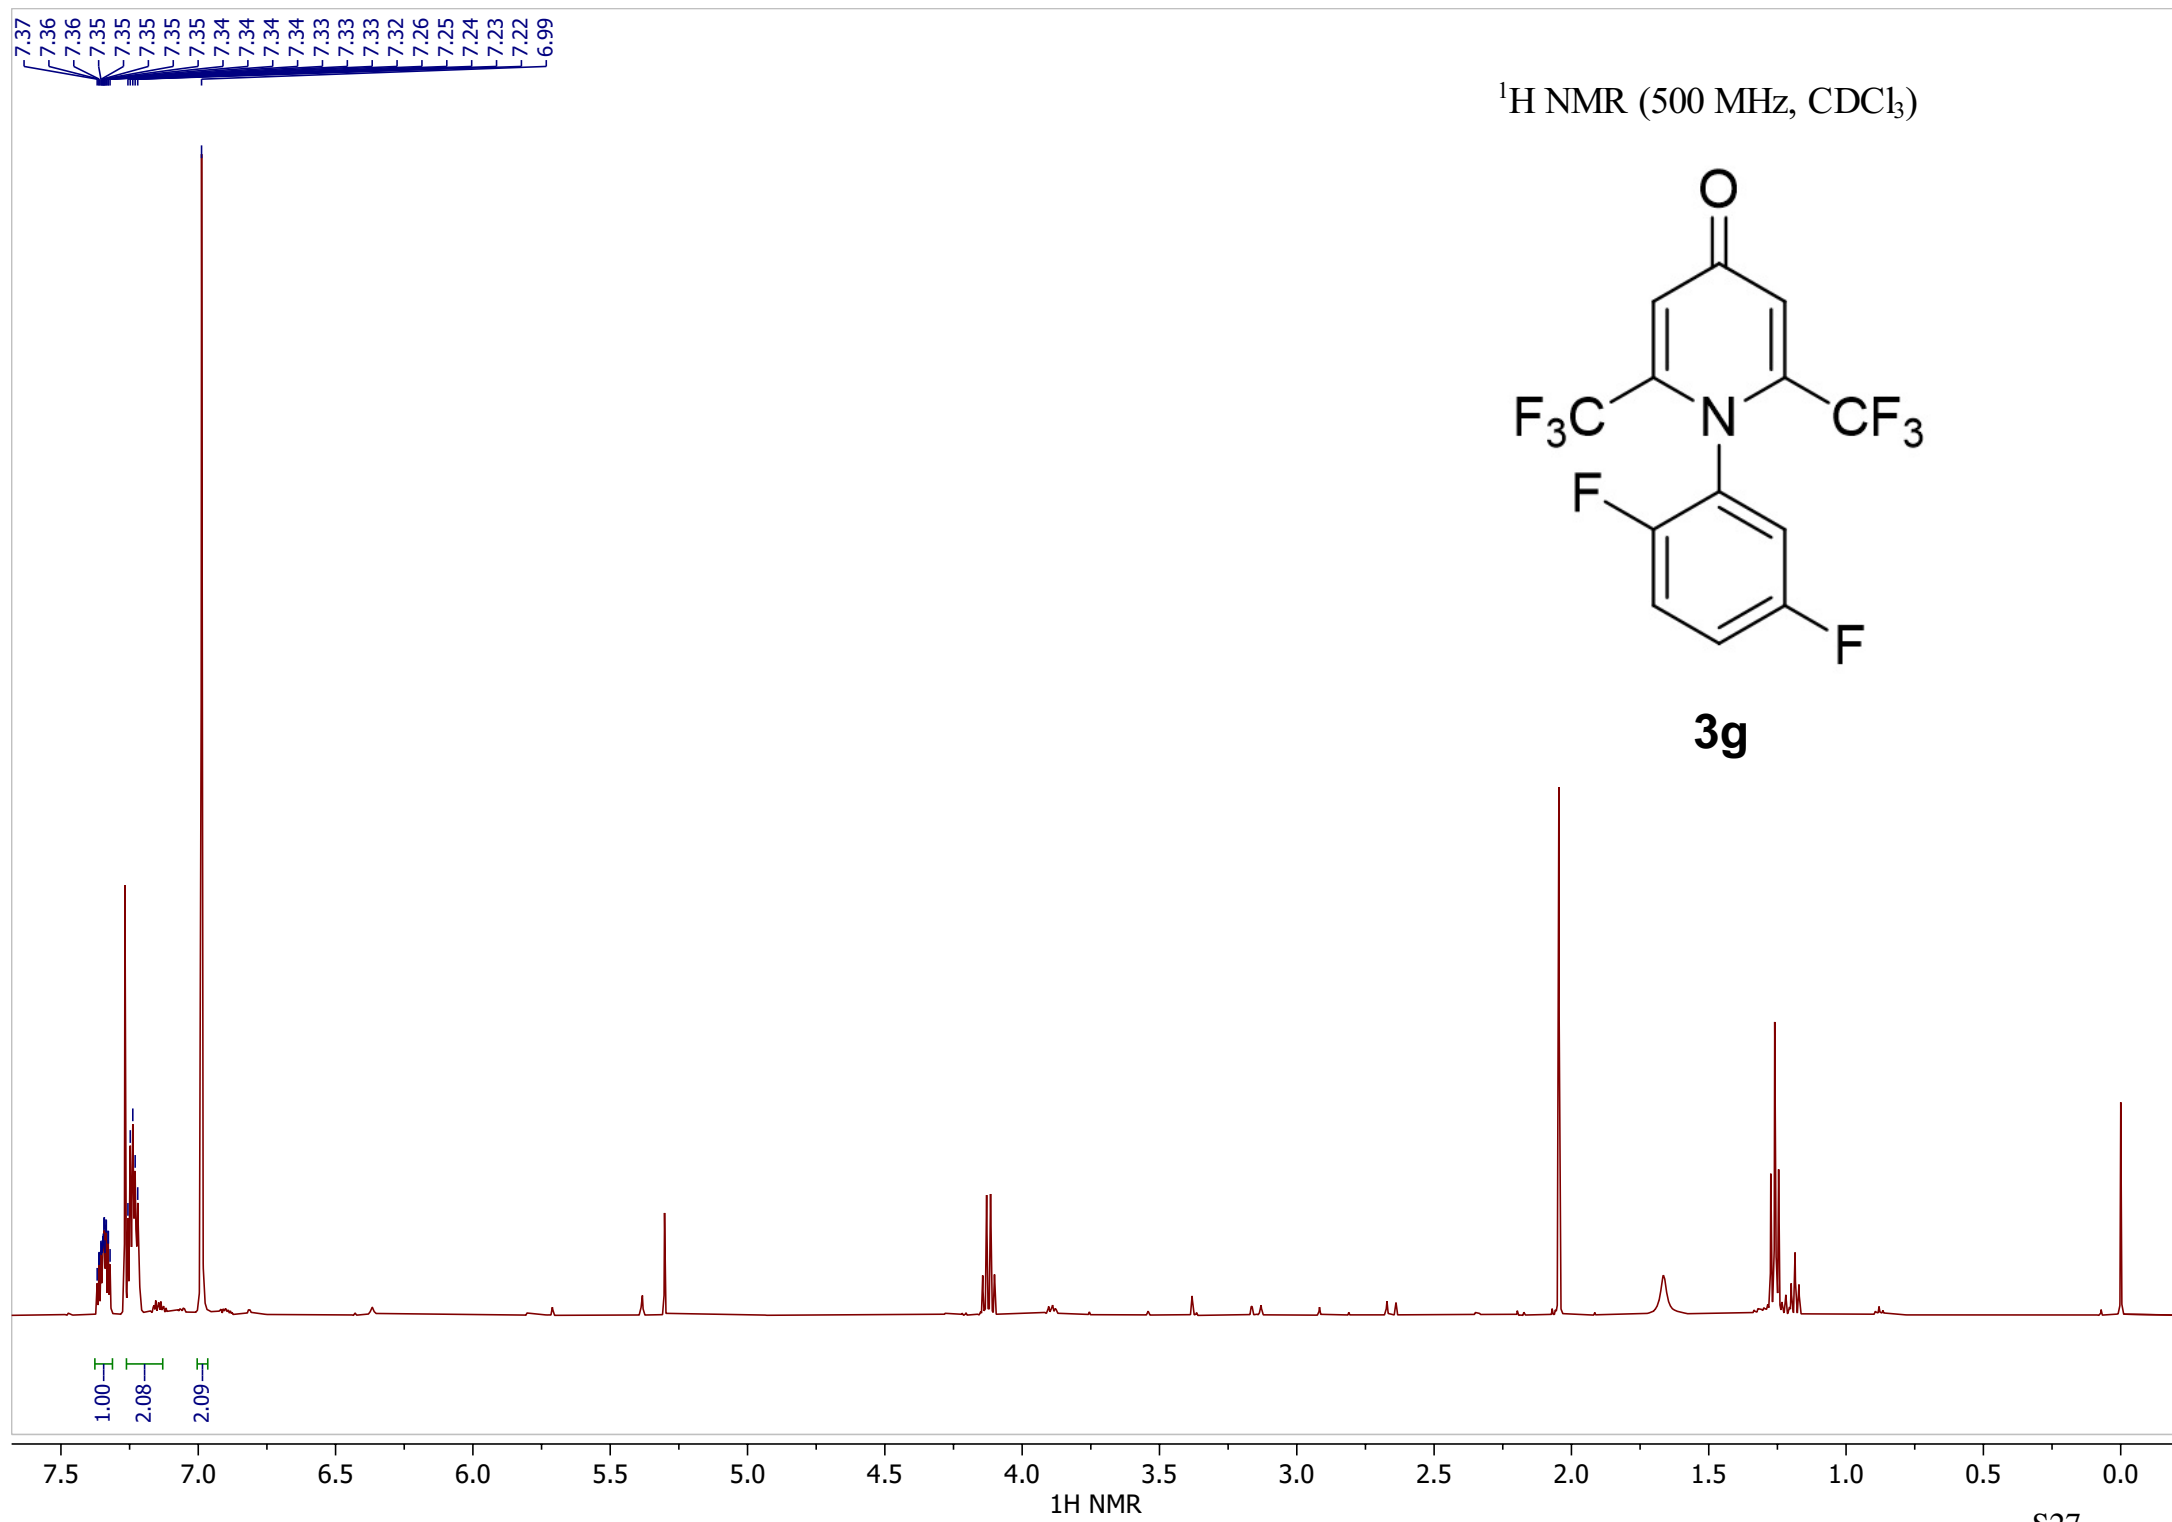

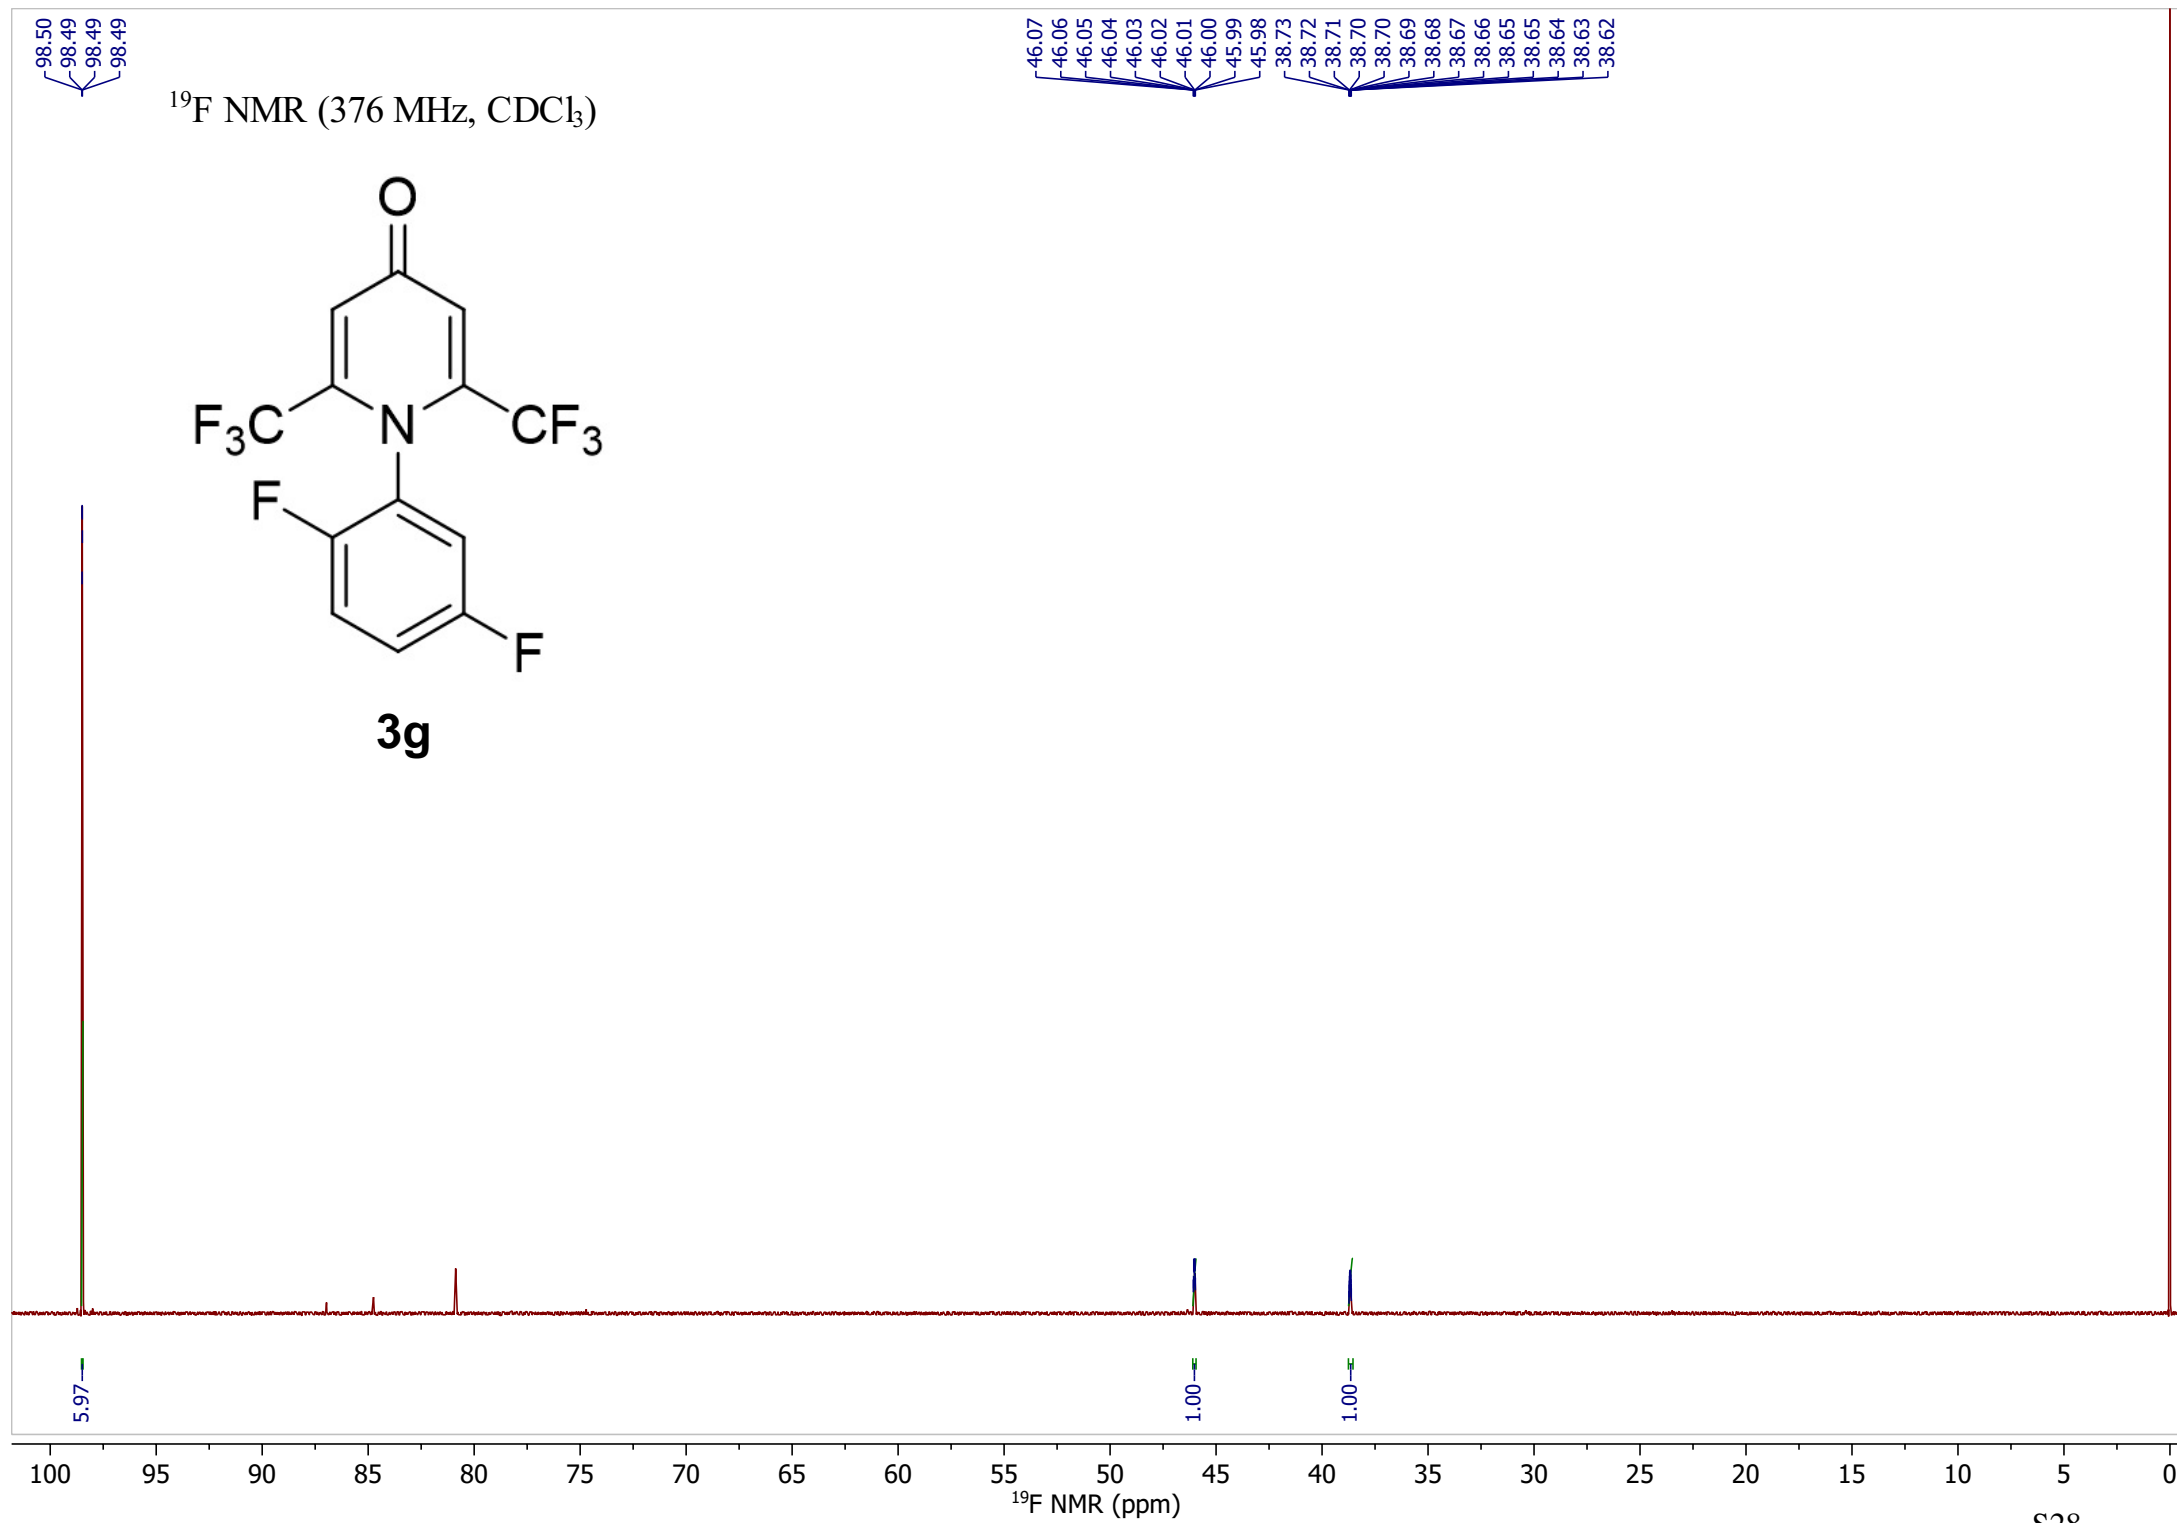

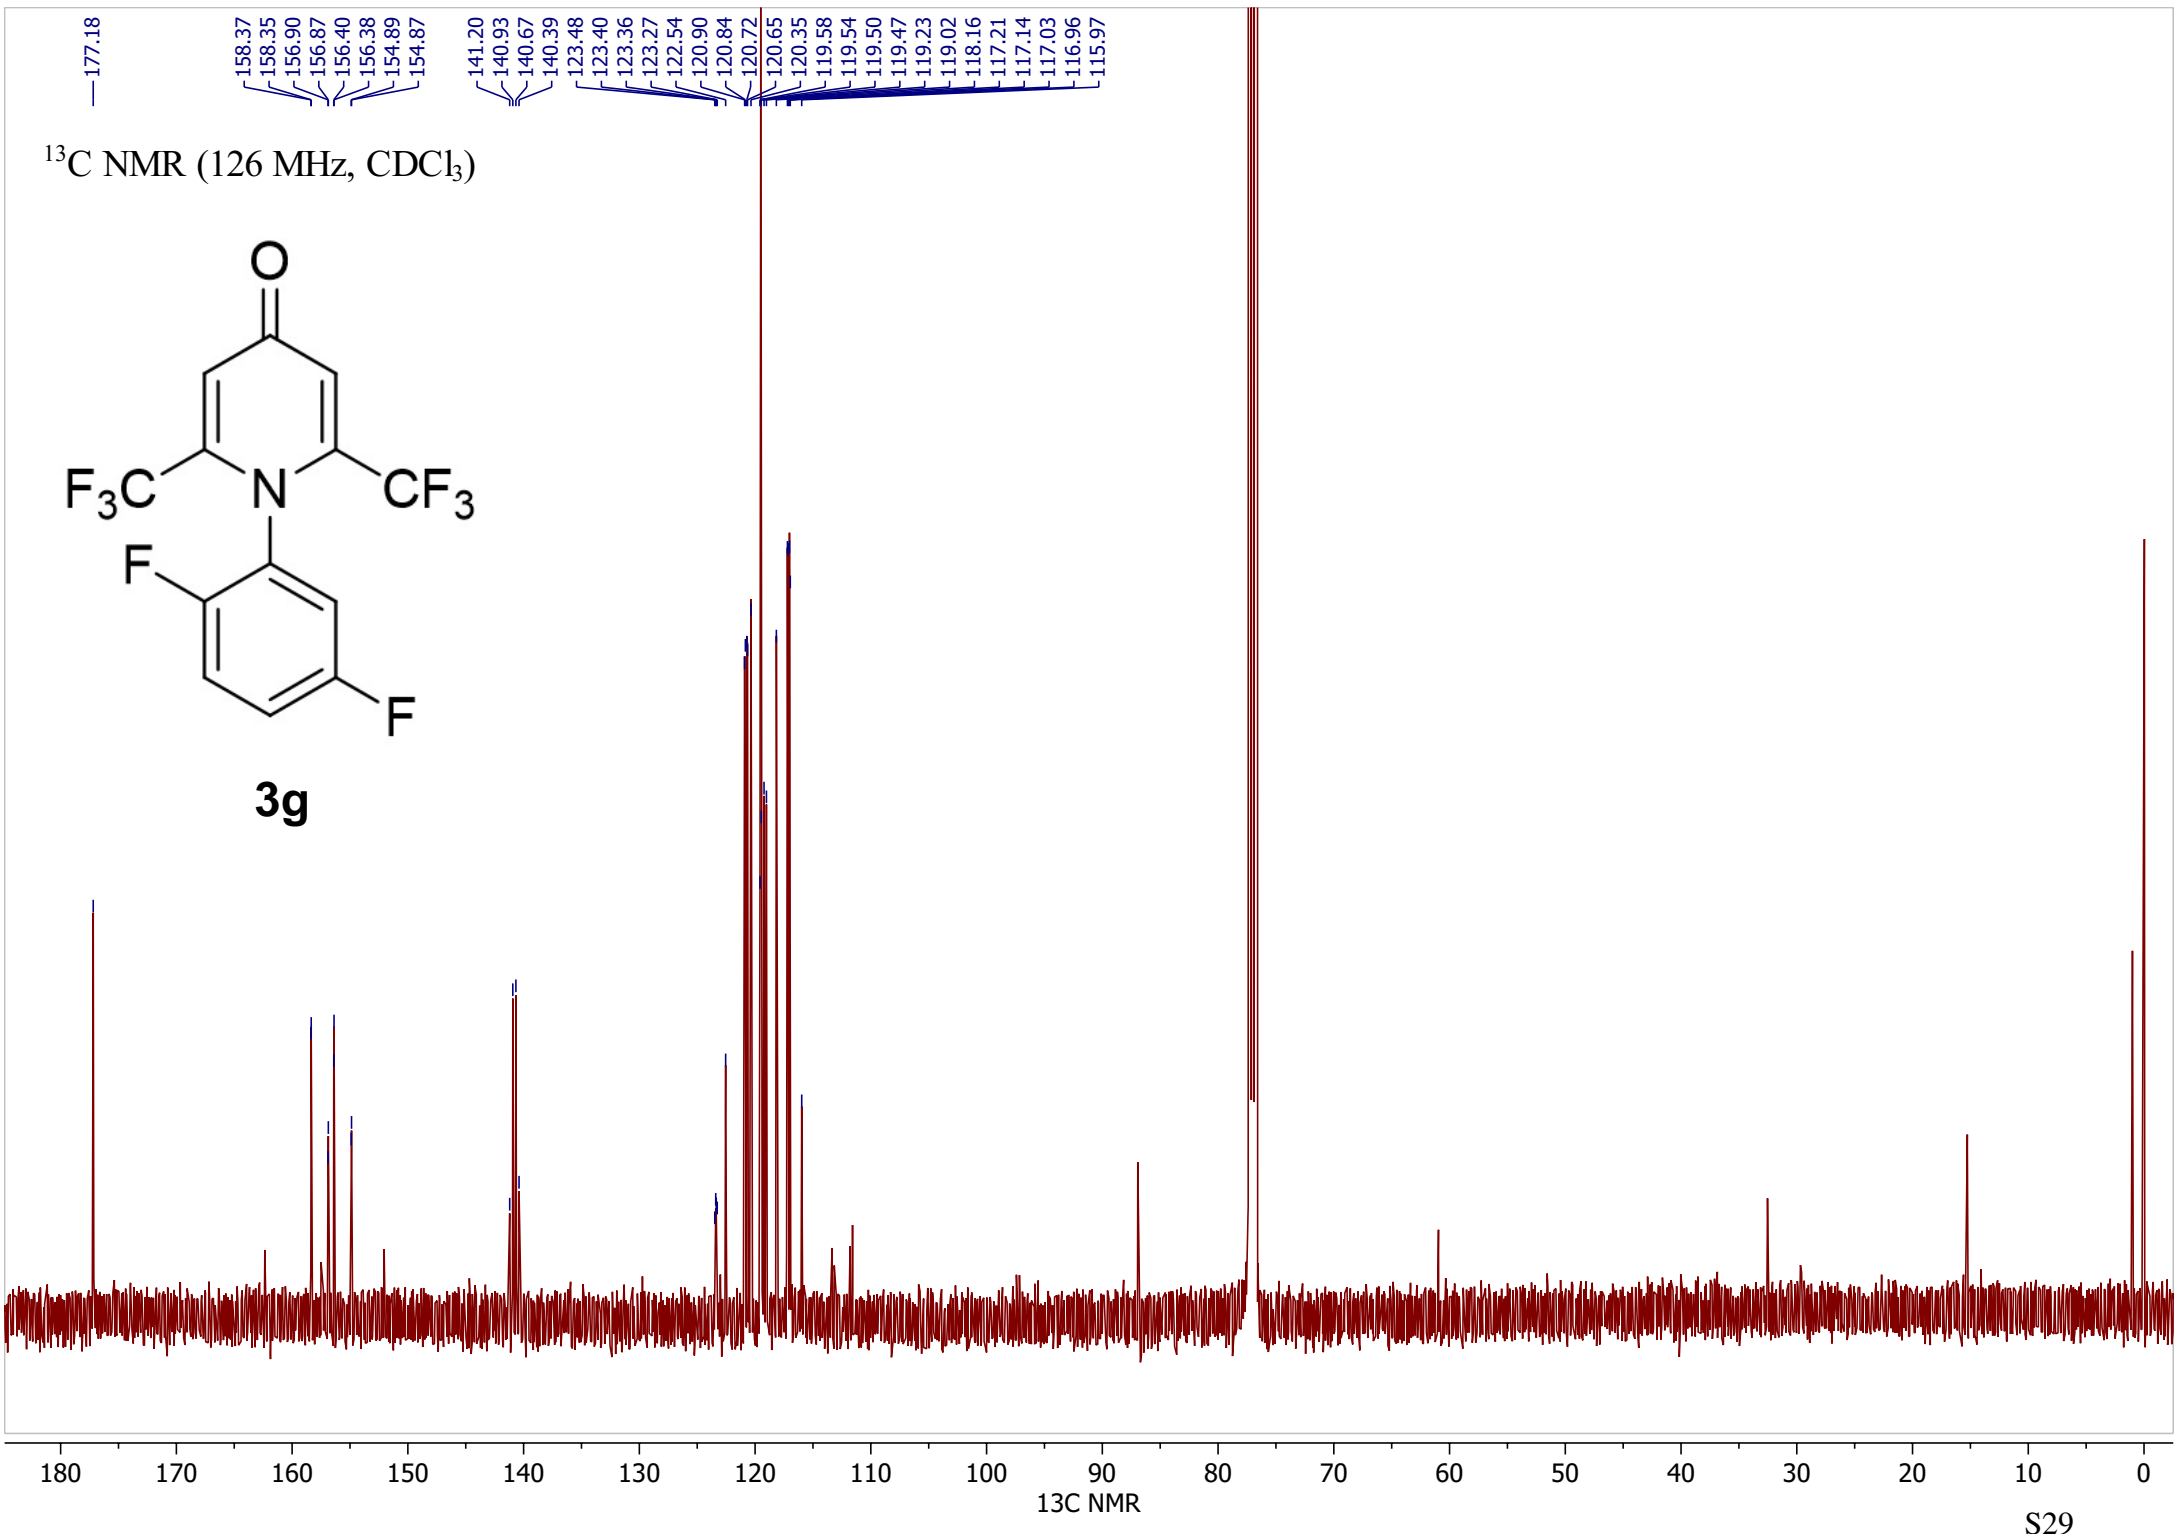

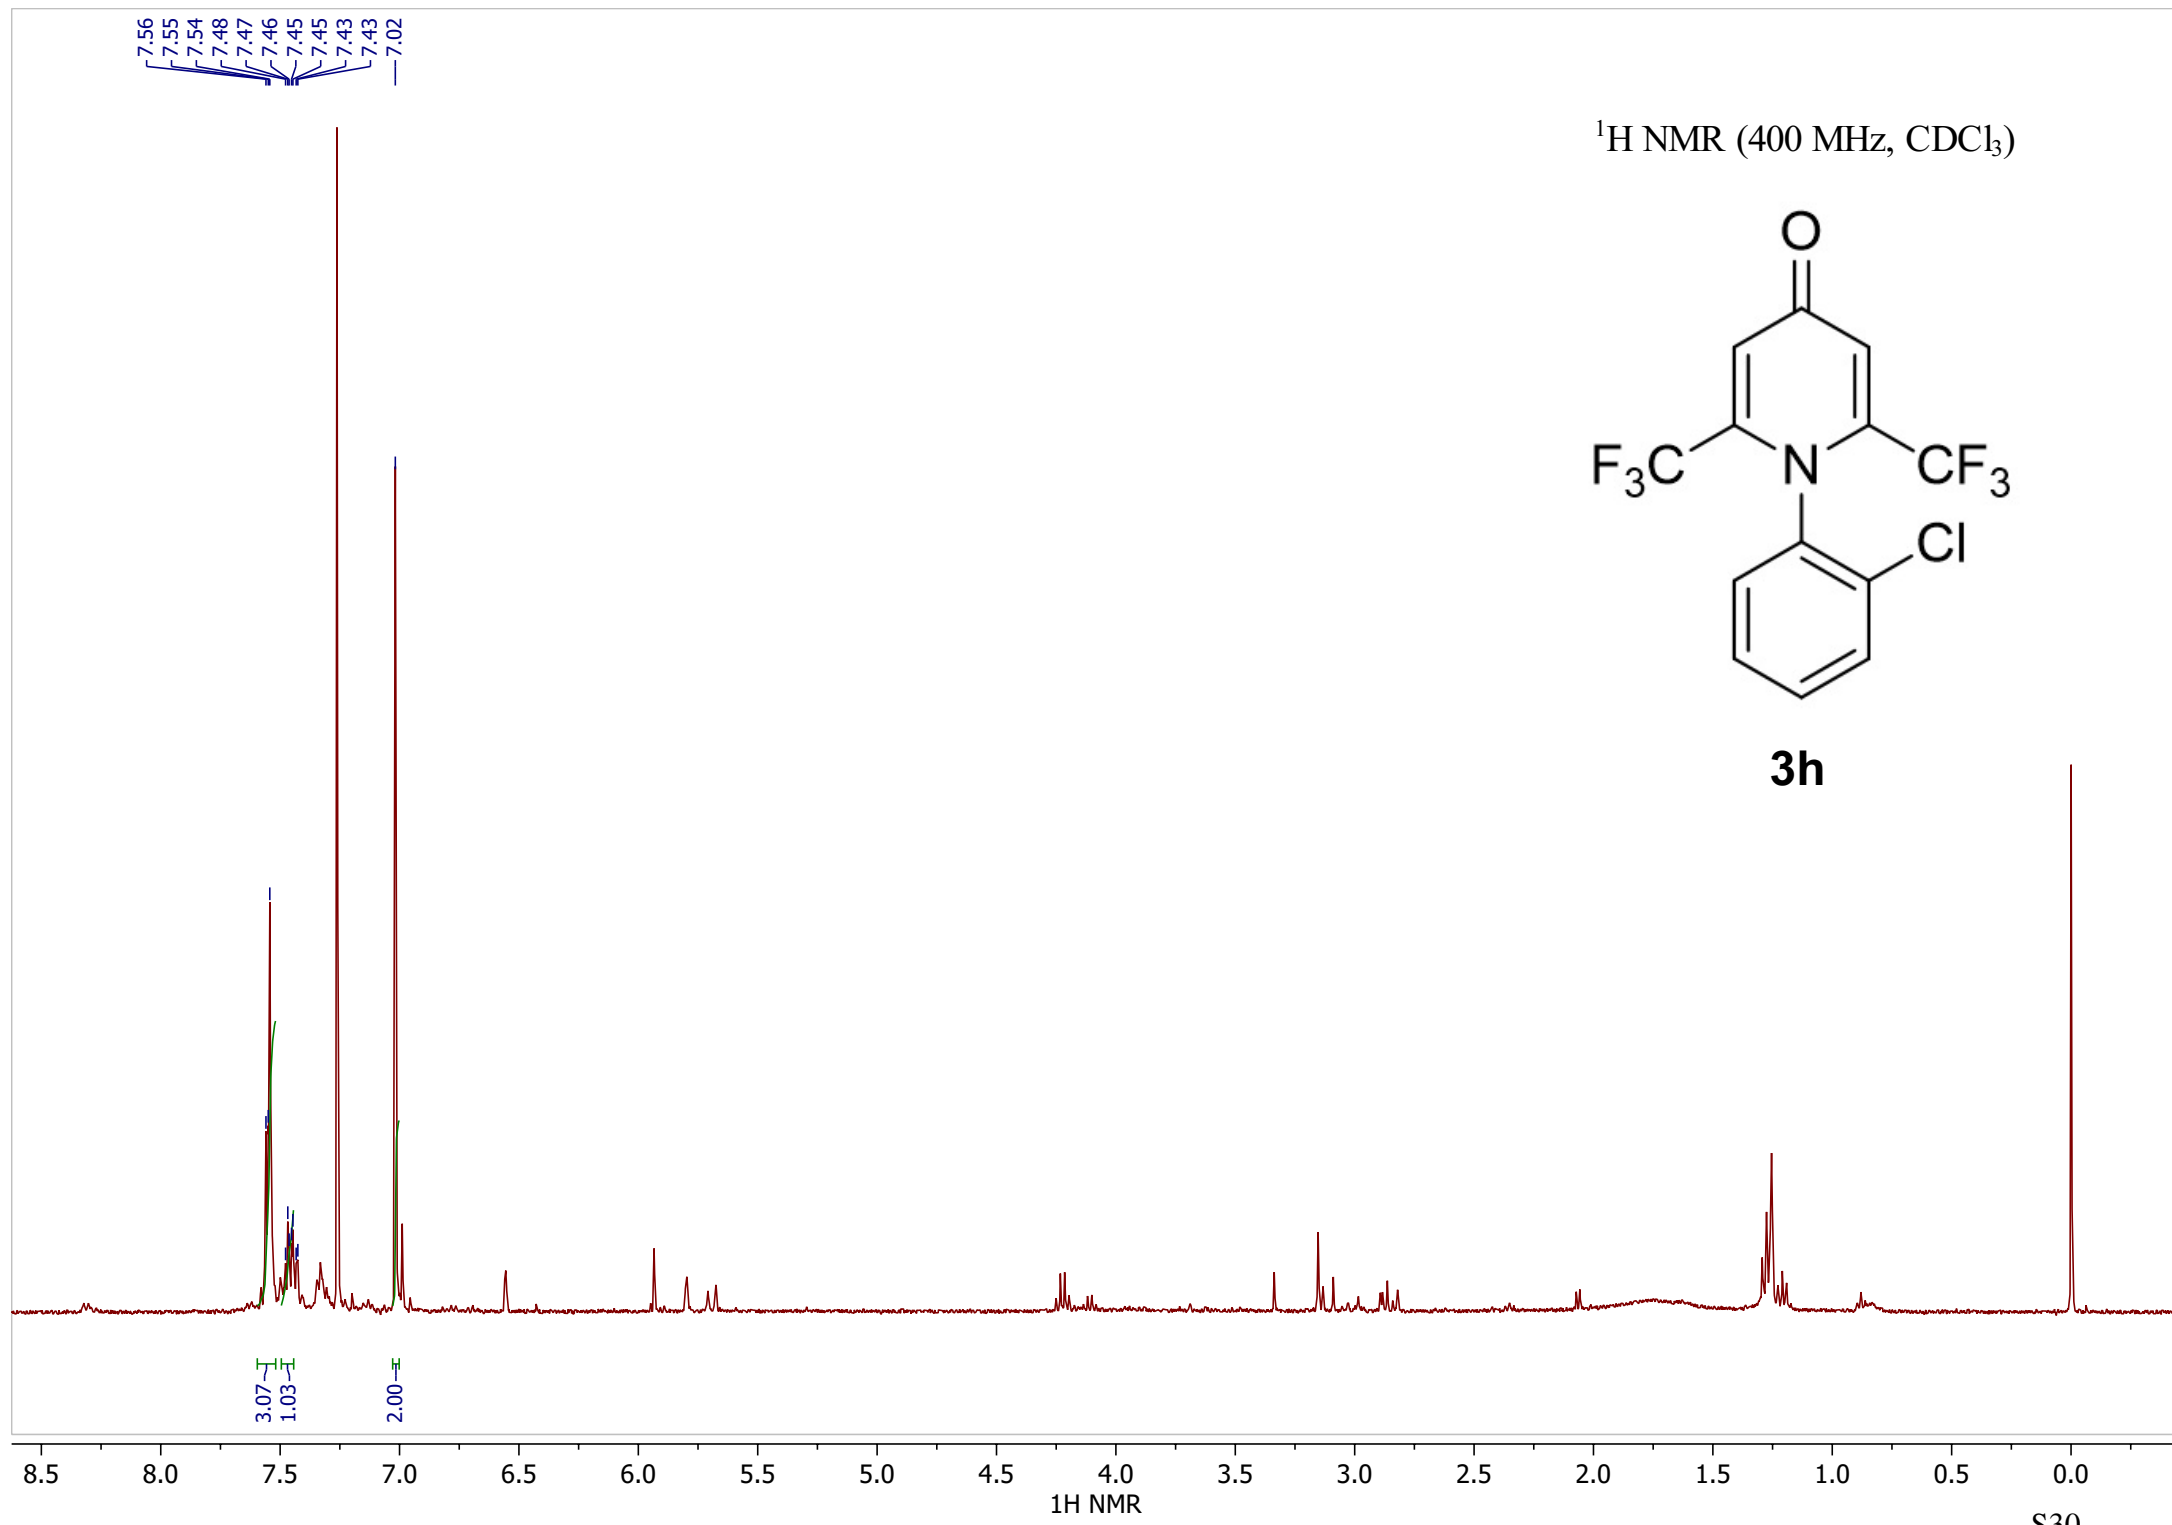

$^{19}\text{F}$  NMR (376 MHz,  $\text{CDCl}_3$ )

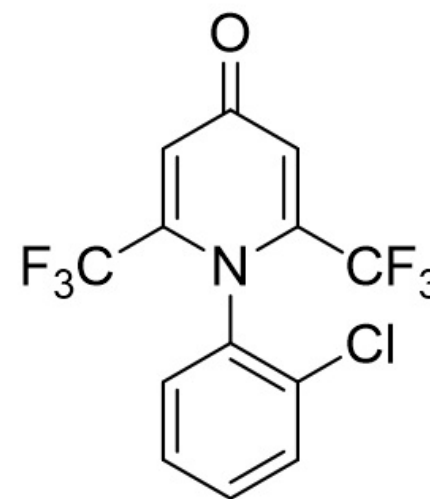

**3h**

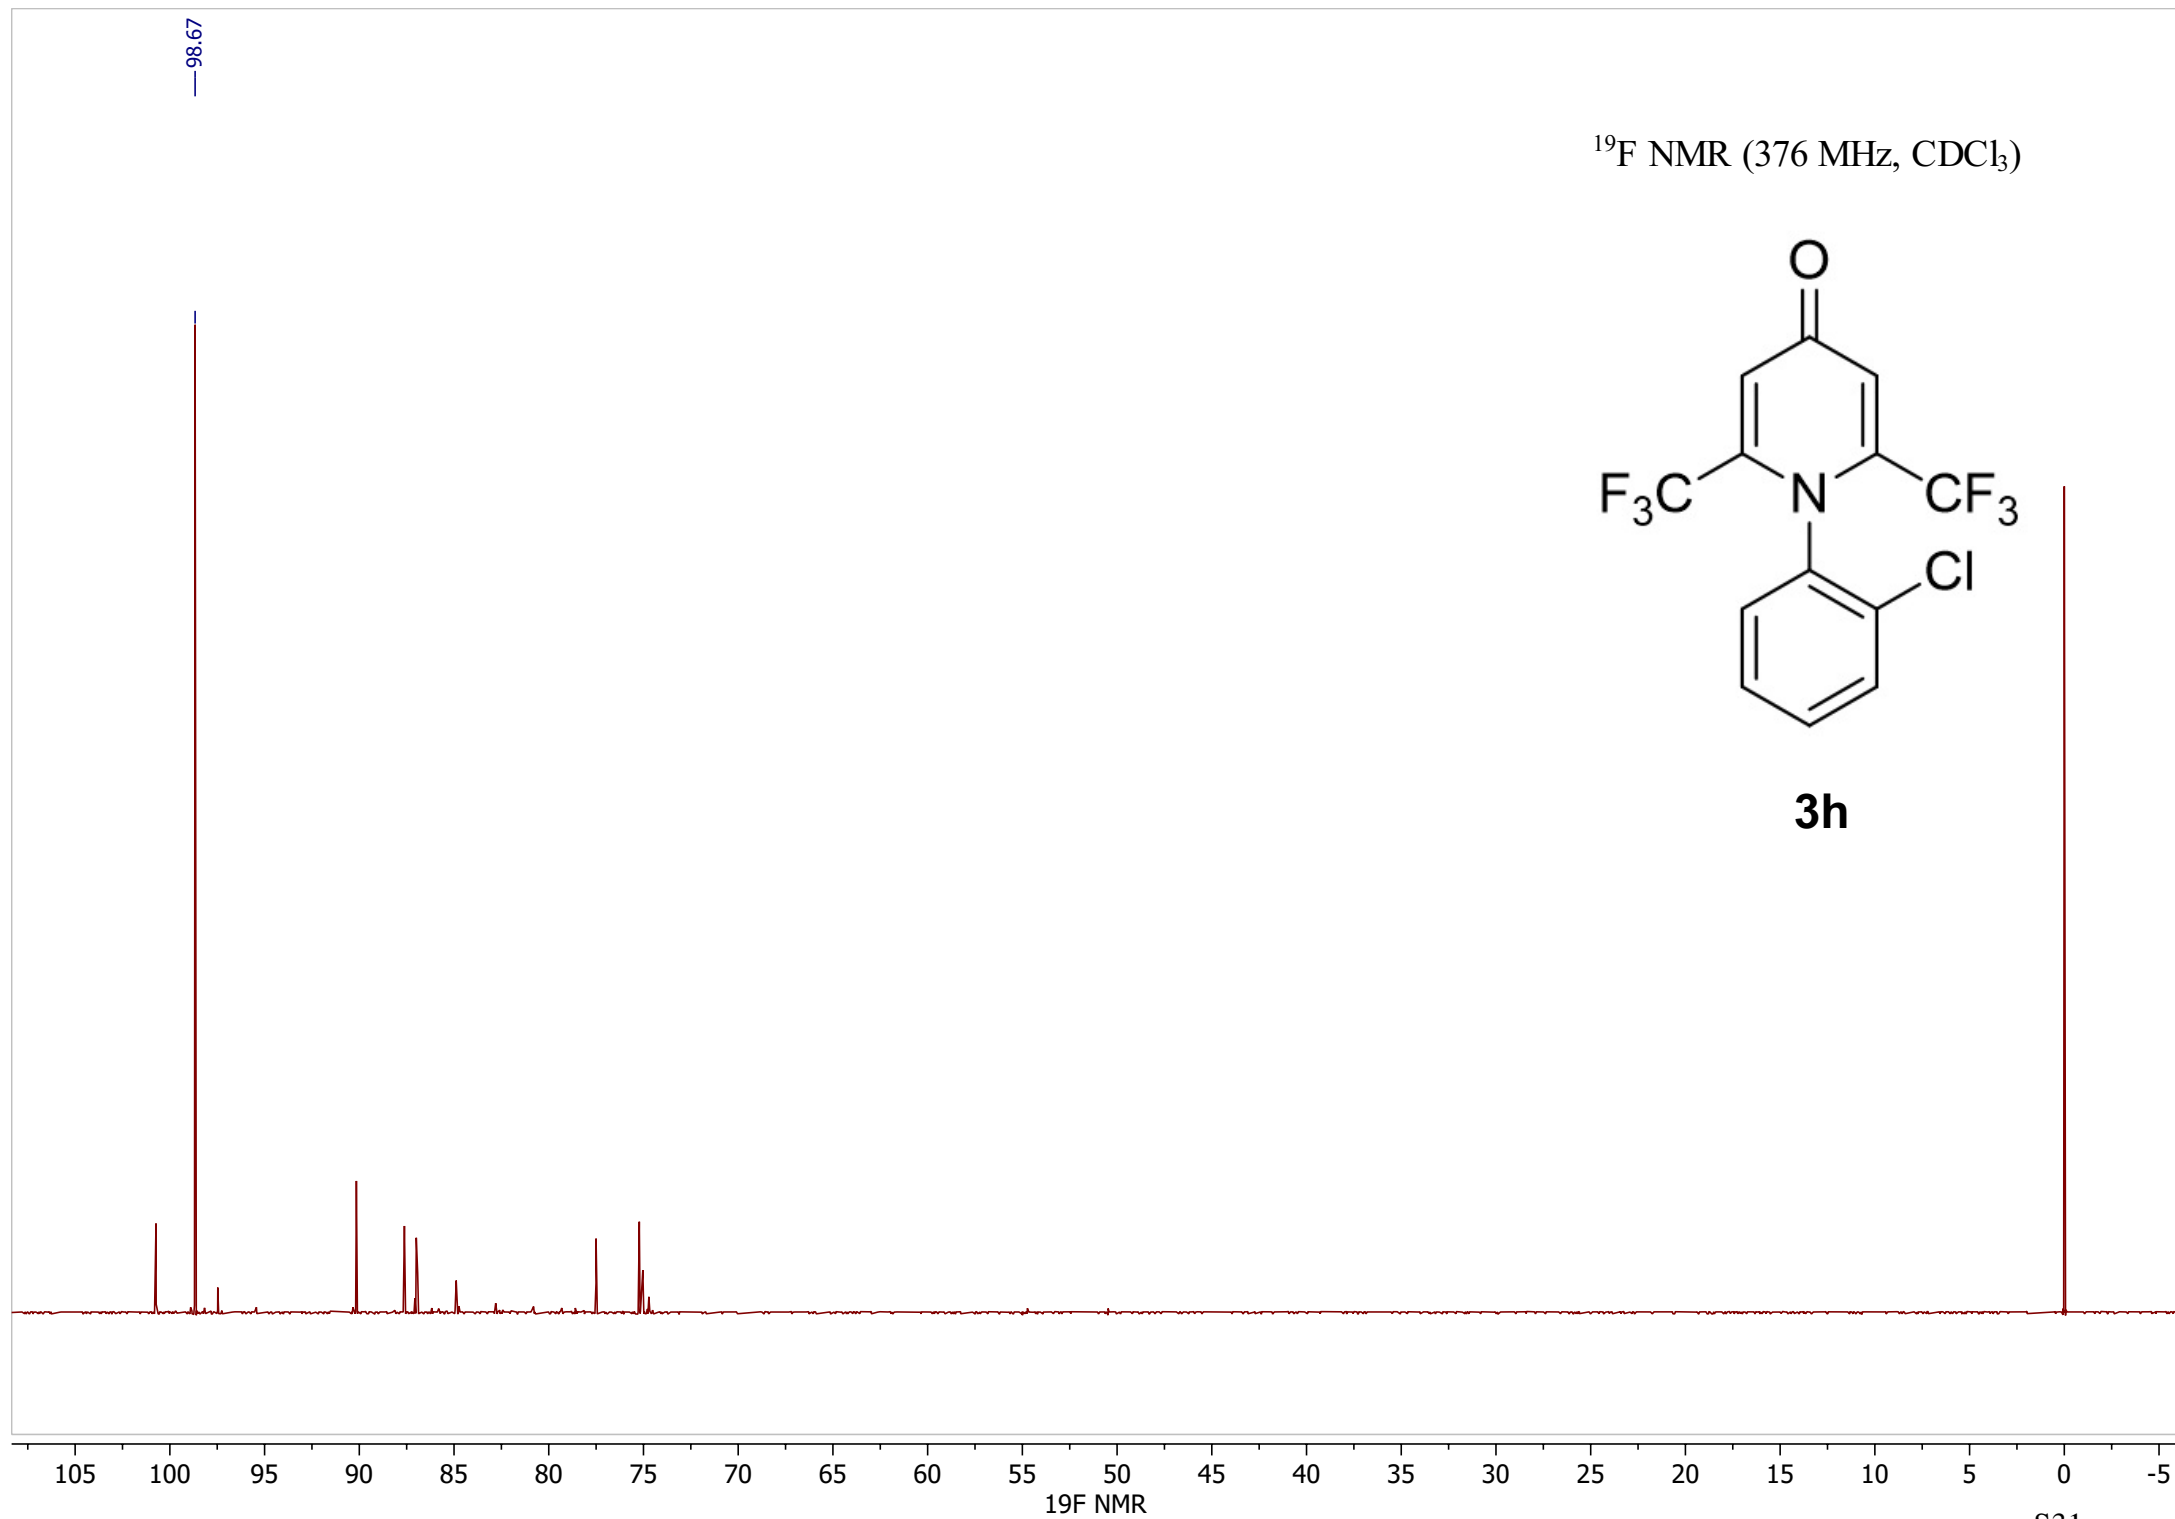

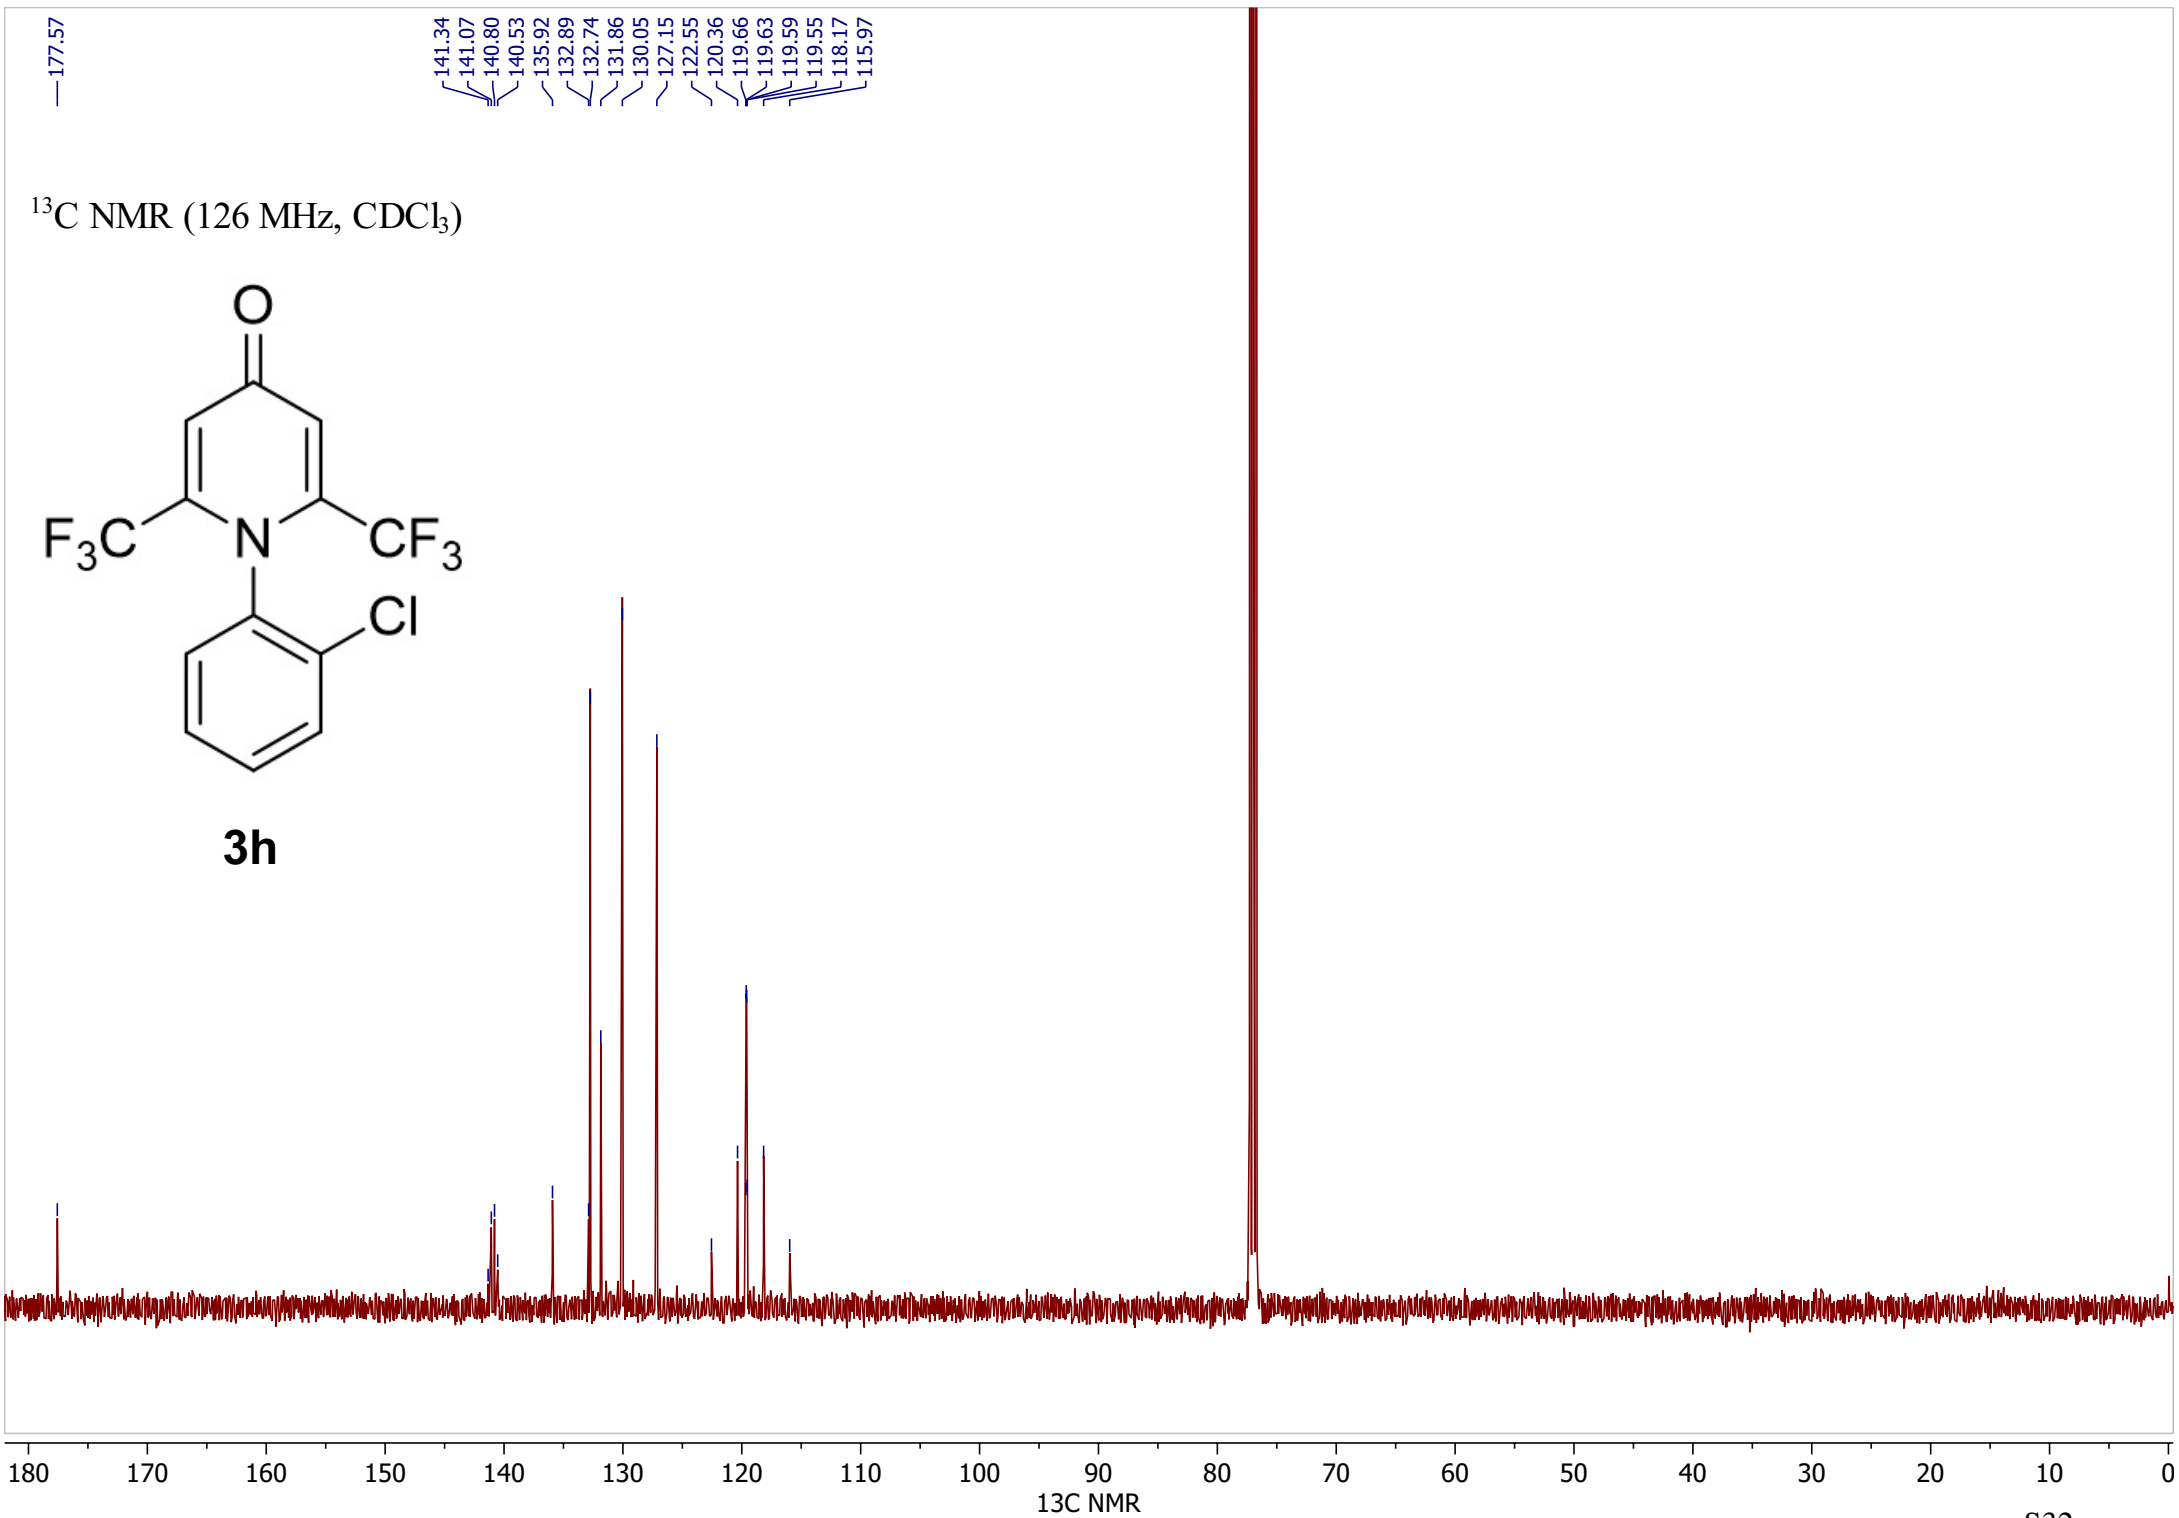



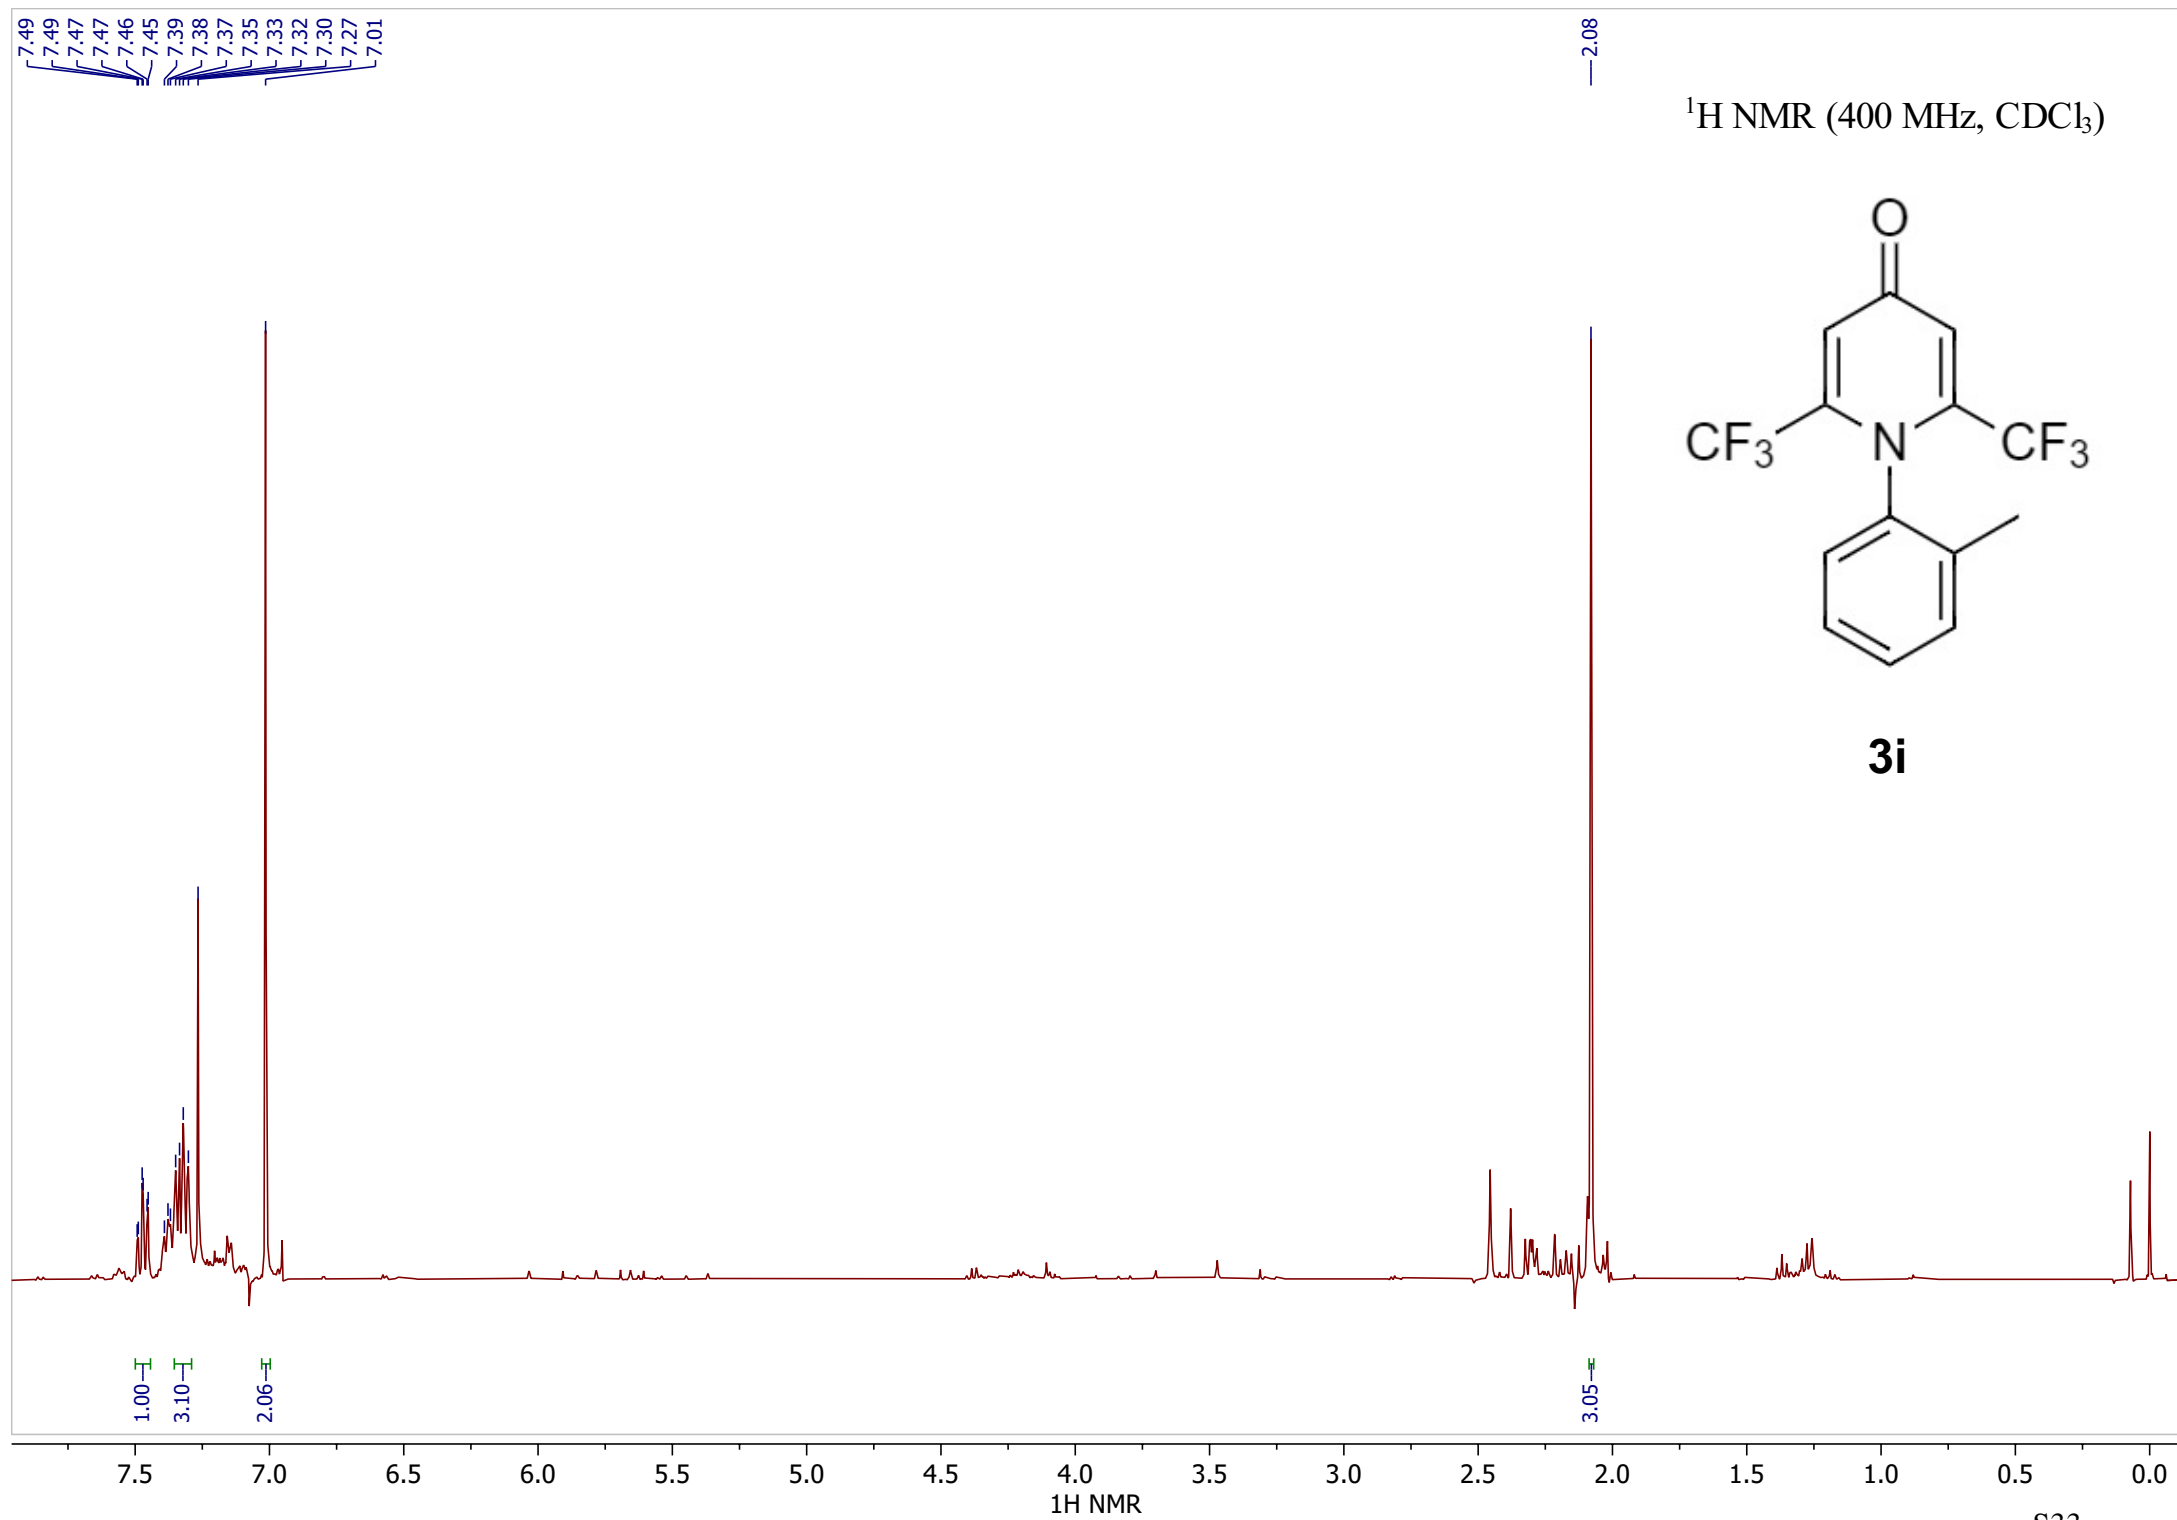

$^{19}\text{F}$  NMR (376 MHz,  $\text{CDCl}_3$ )

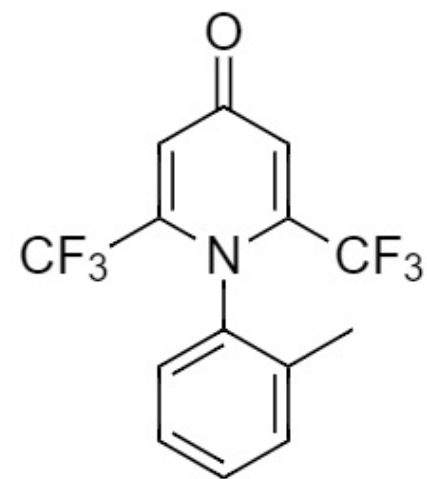

**3i**

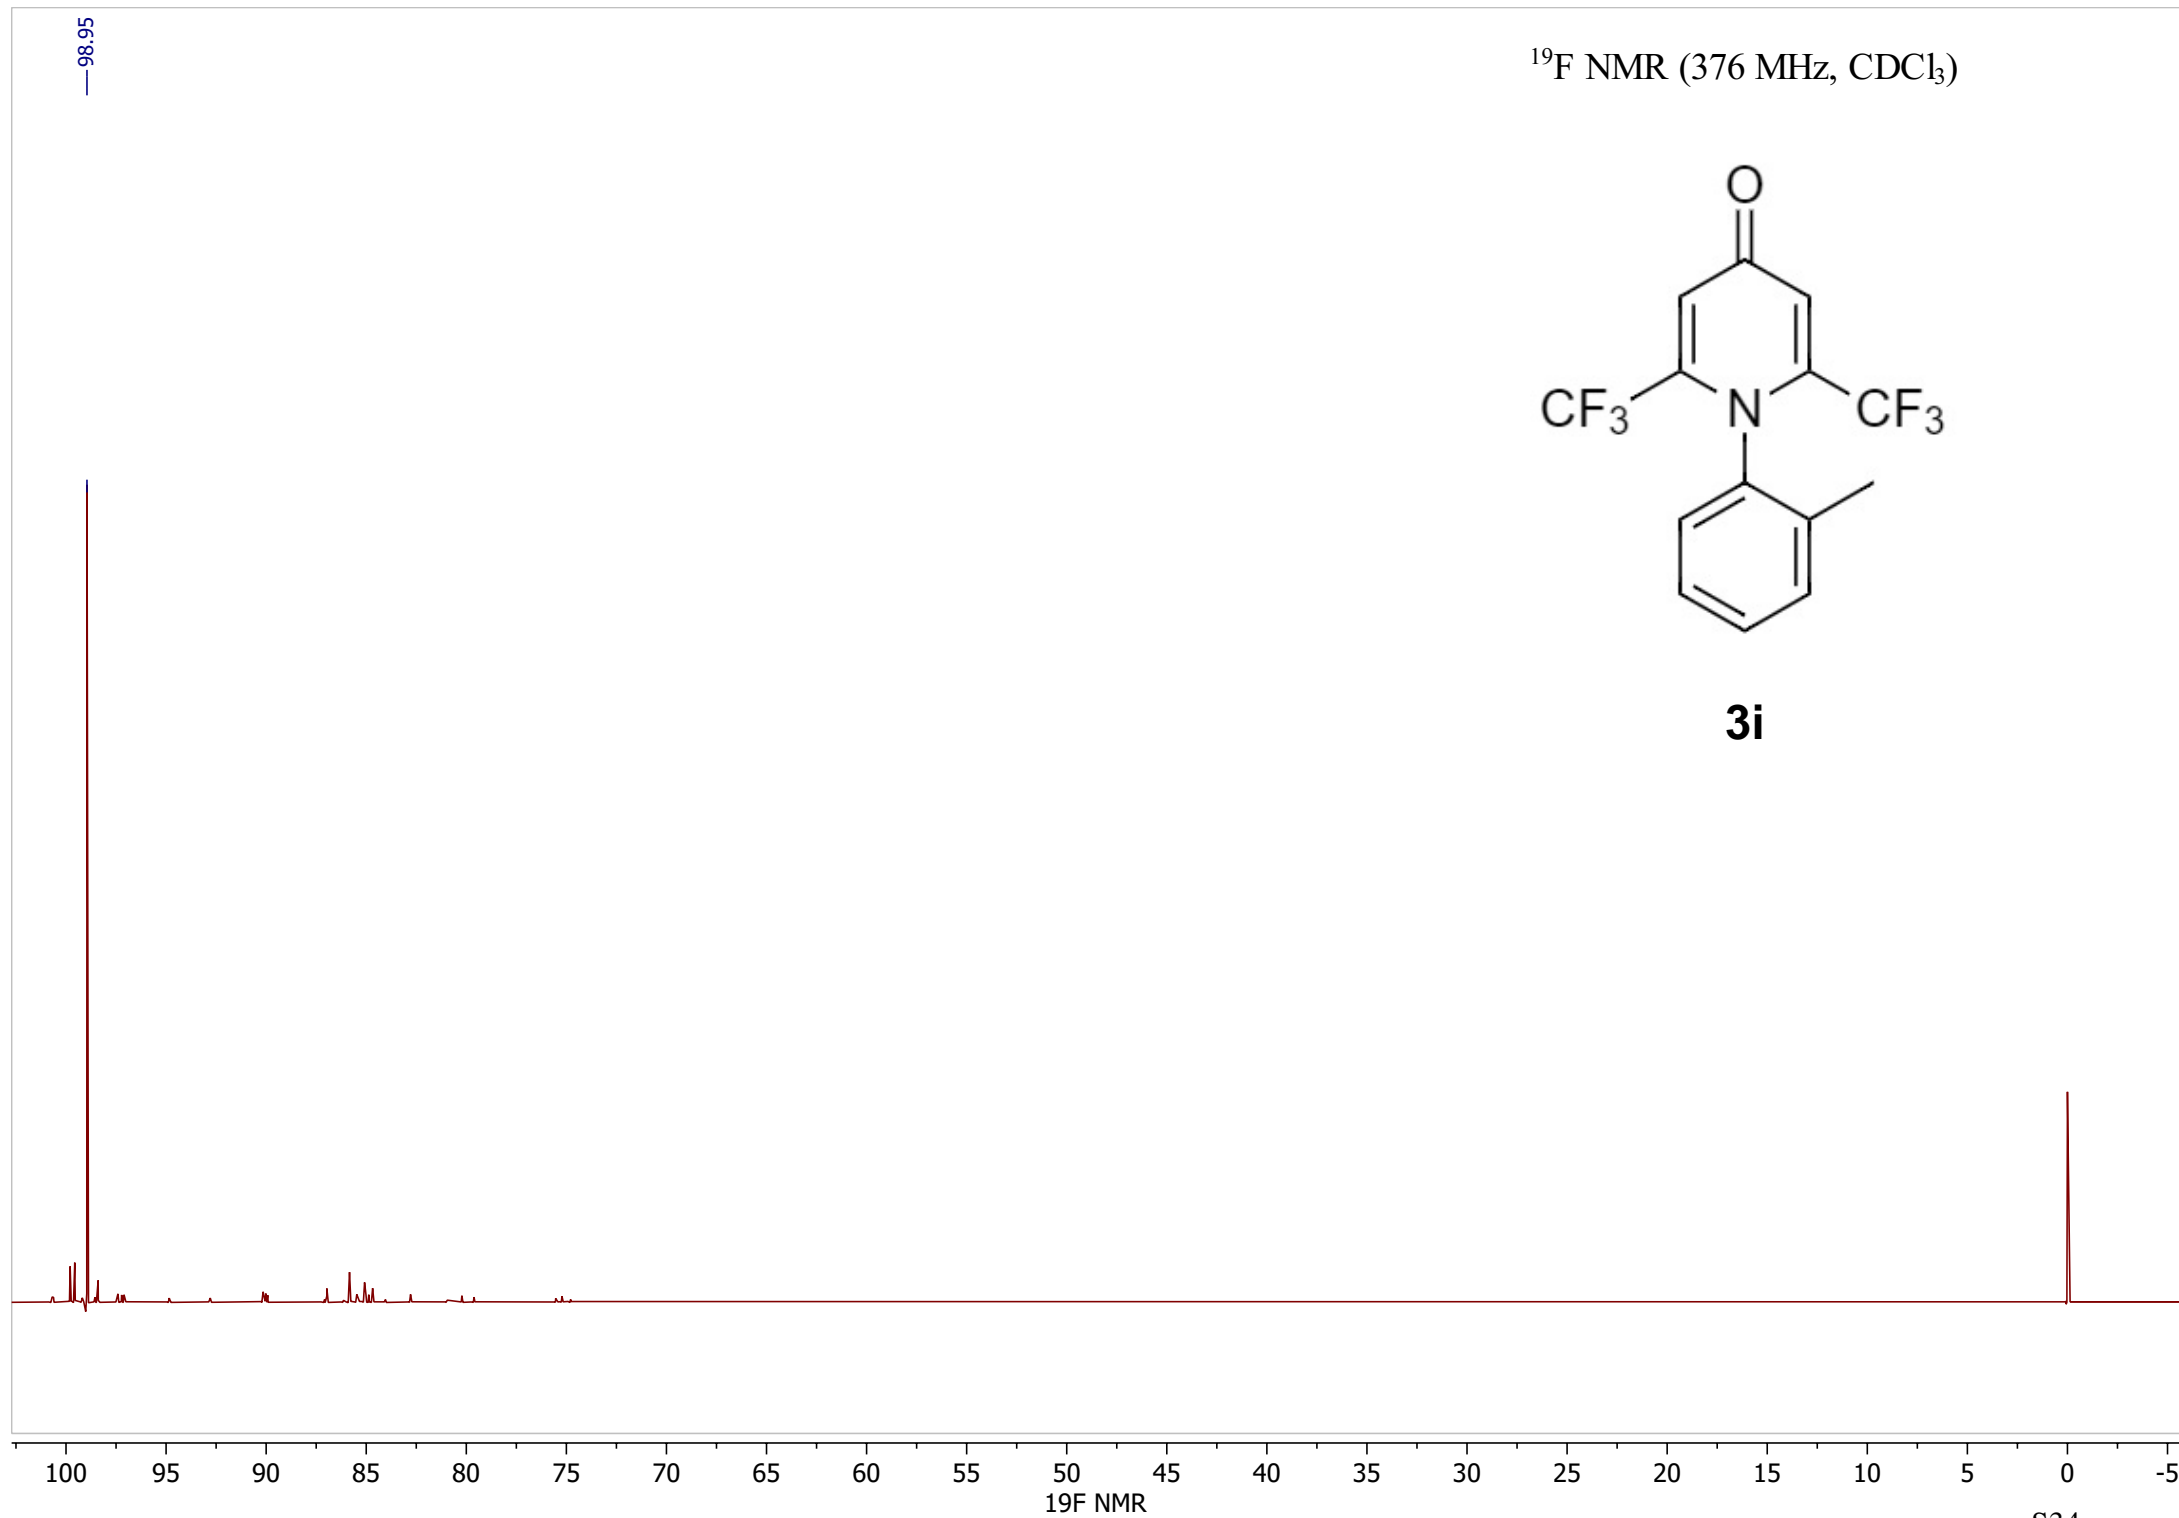

—177.87

141.59  
141.37  
141.15  
140.93  
138.50  
134.06  
131.48  
130.70  
130.28  
126.22  
122.01  
120.18  
119.58  
119.55  
118.36  
116.53

—16.99

$^{13}\text{C}$  NMR (151 MHz,  $\text{CDCl}_3$ )

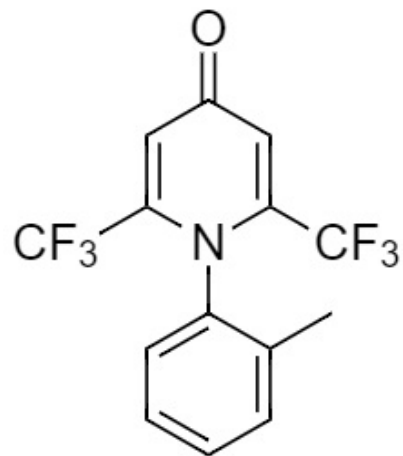

**3i**

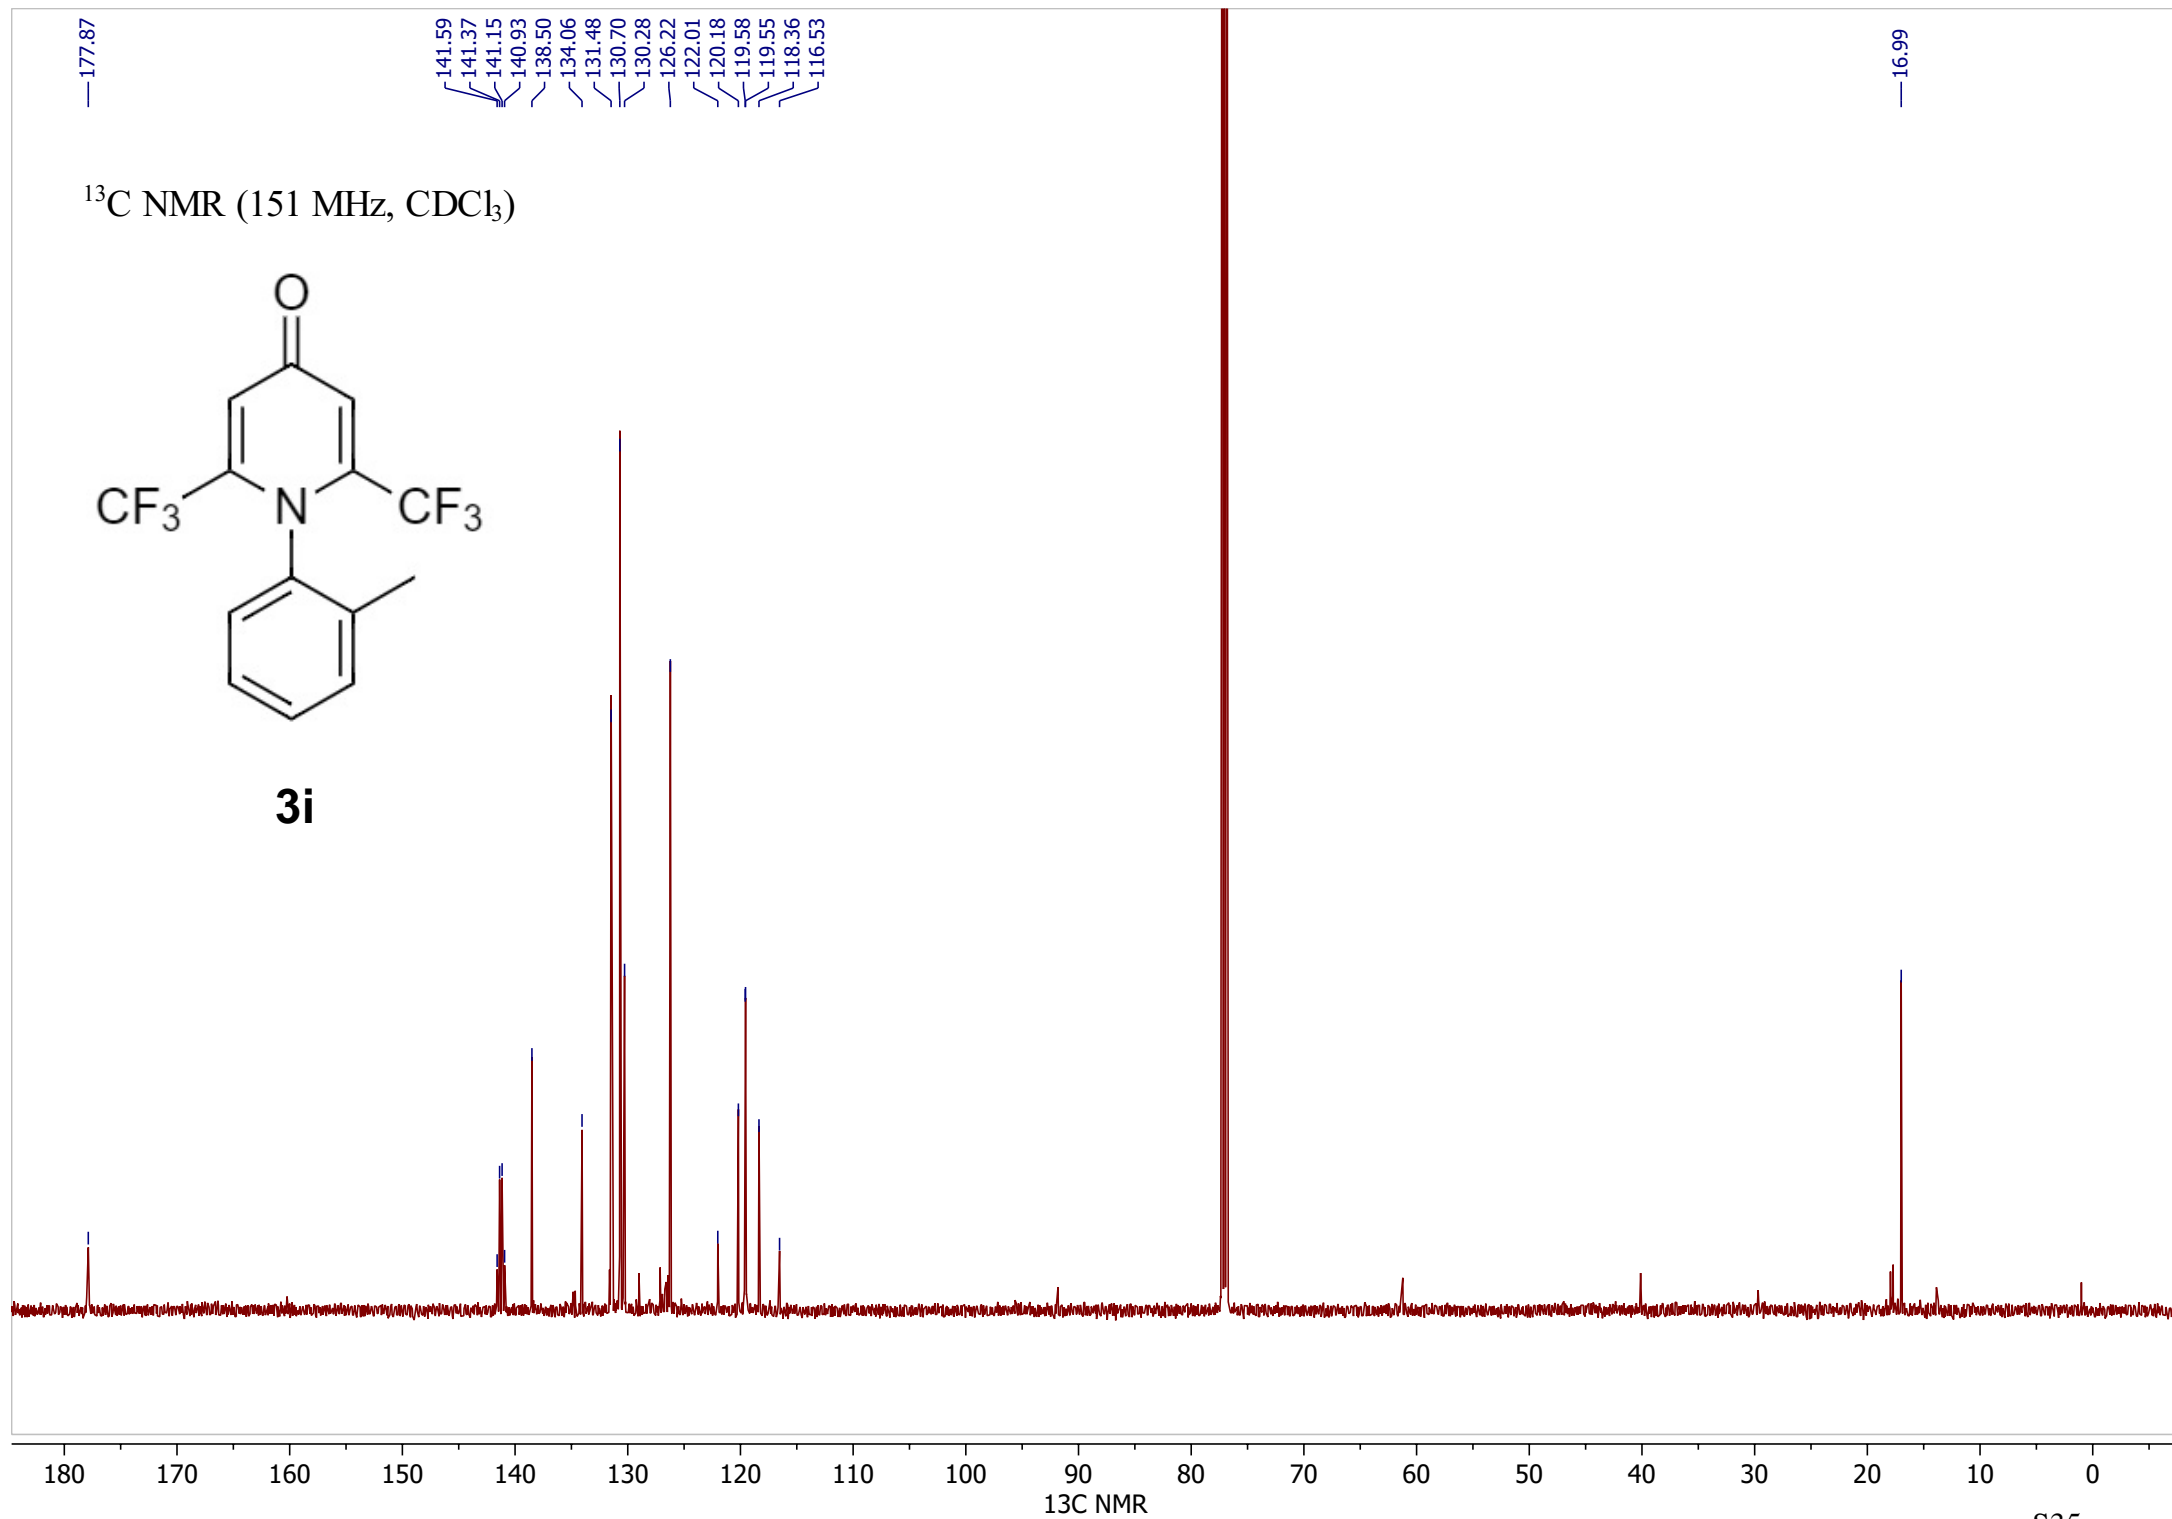

<sup>1</sup>H NMR (500 MHz, CDCl<sub>3</sub>)

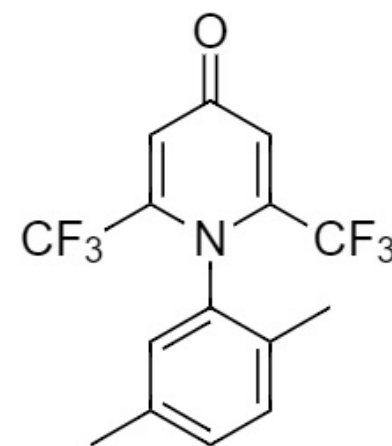

**3j**

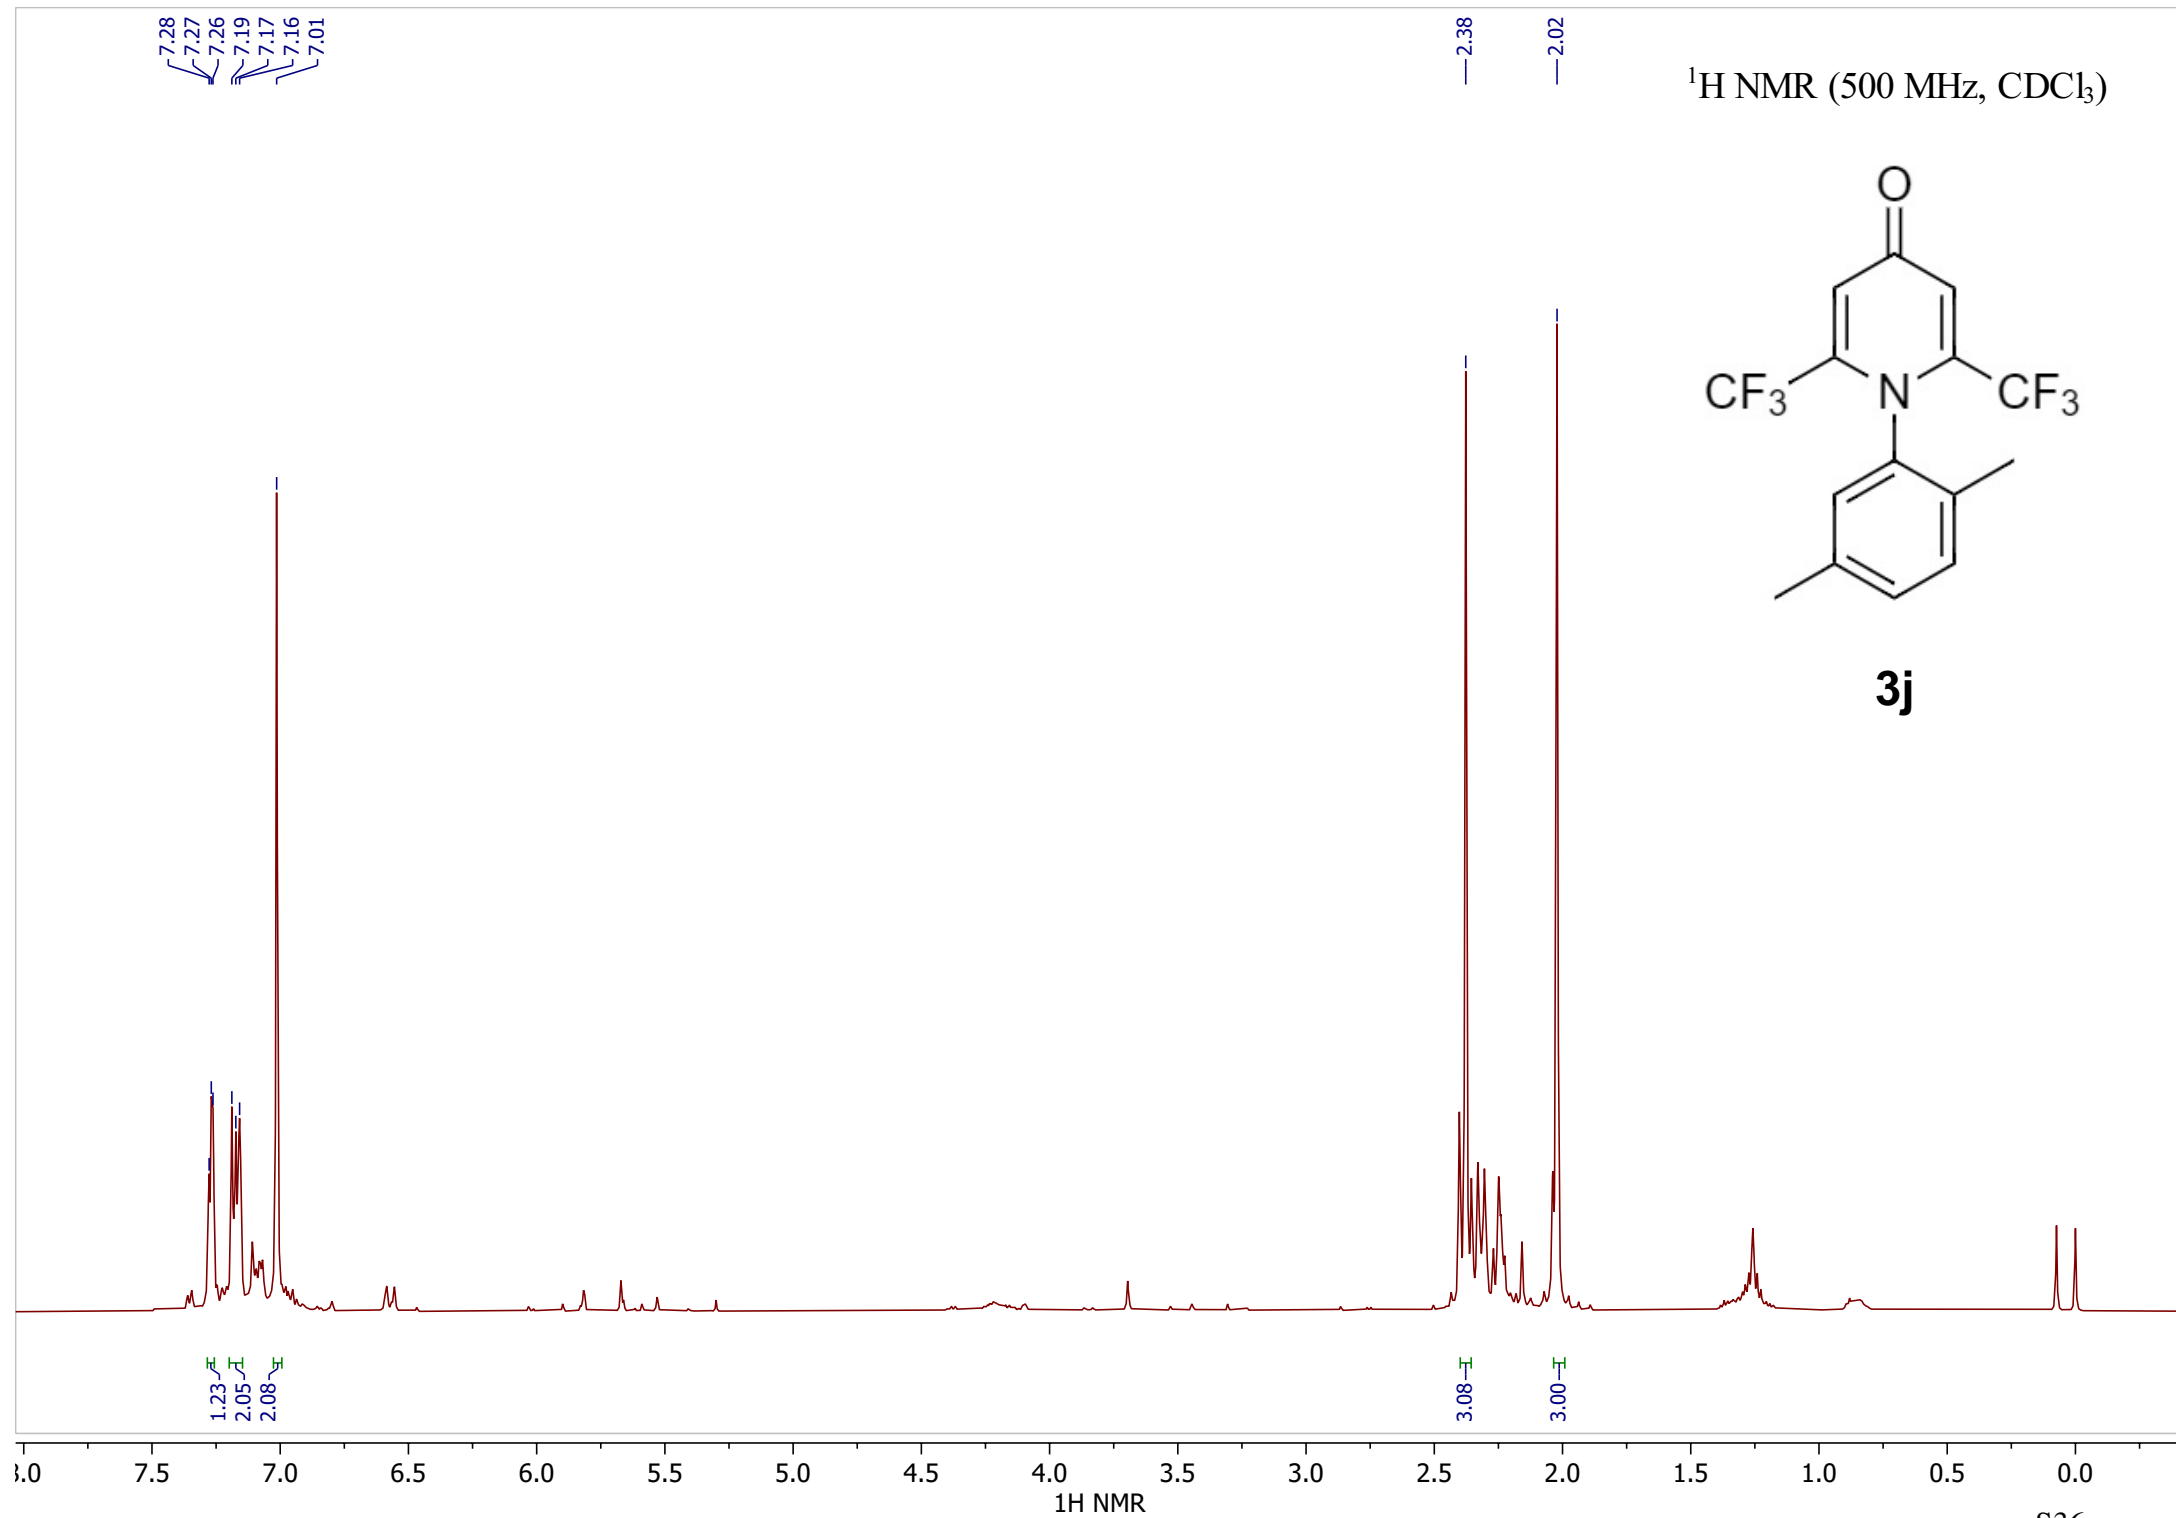

<sup>19</sup>F NMR (471 MHz, CDCl<sub>3</sub>)

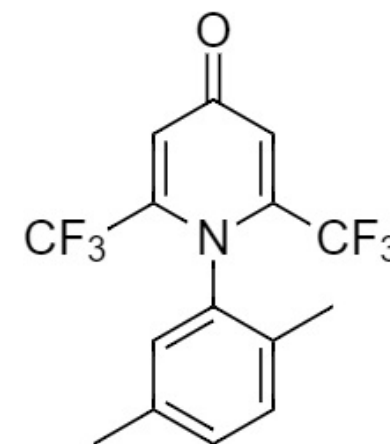

**3j**

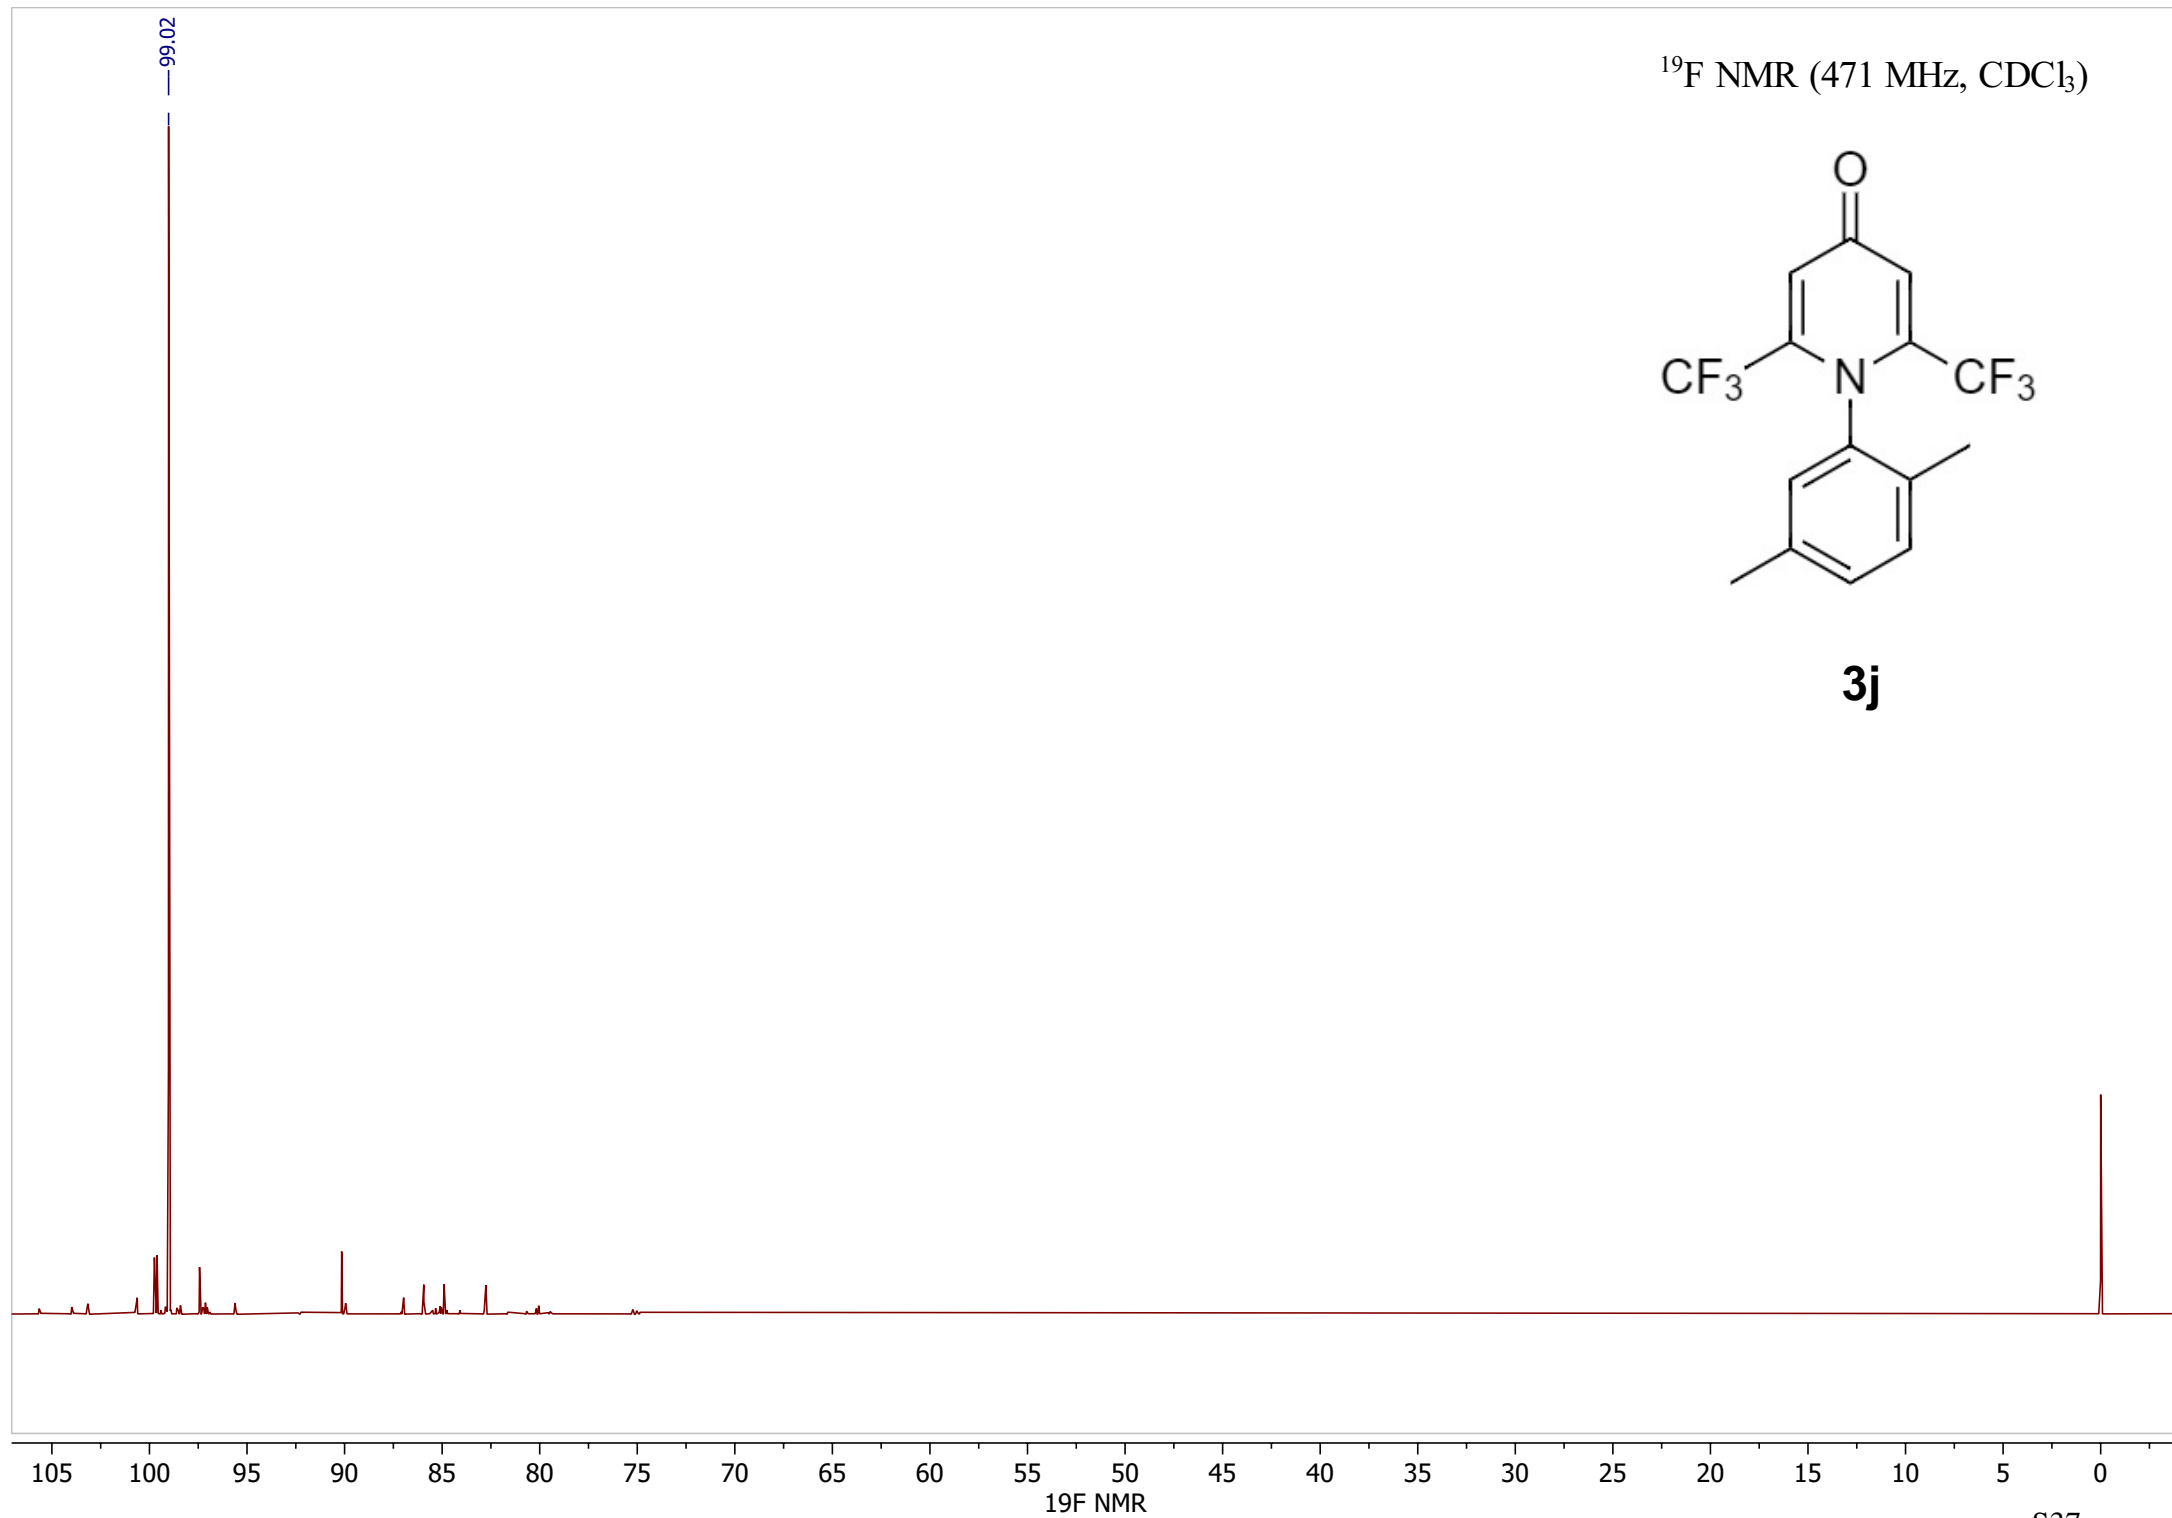

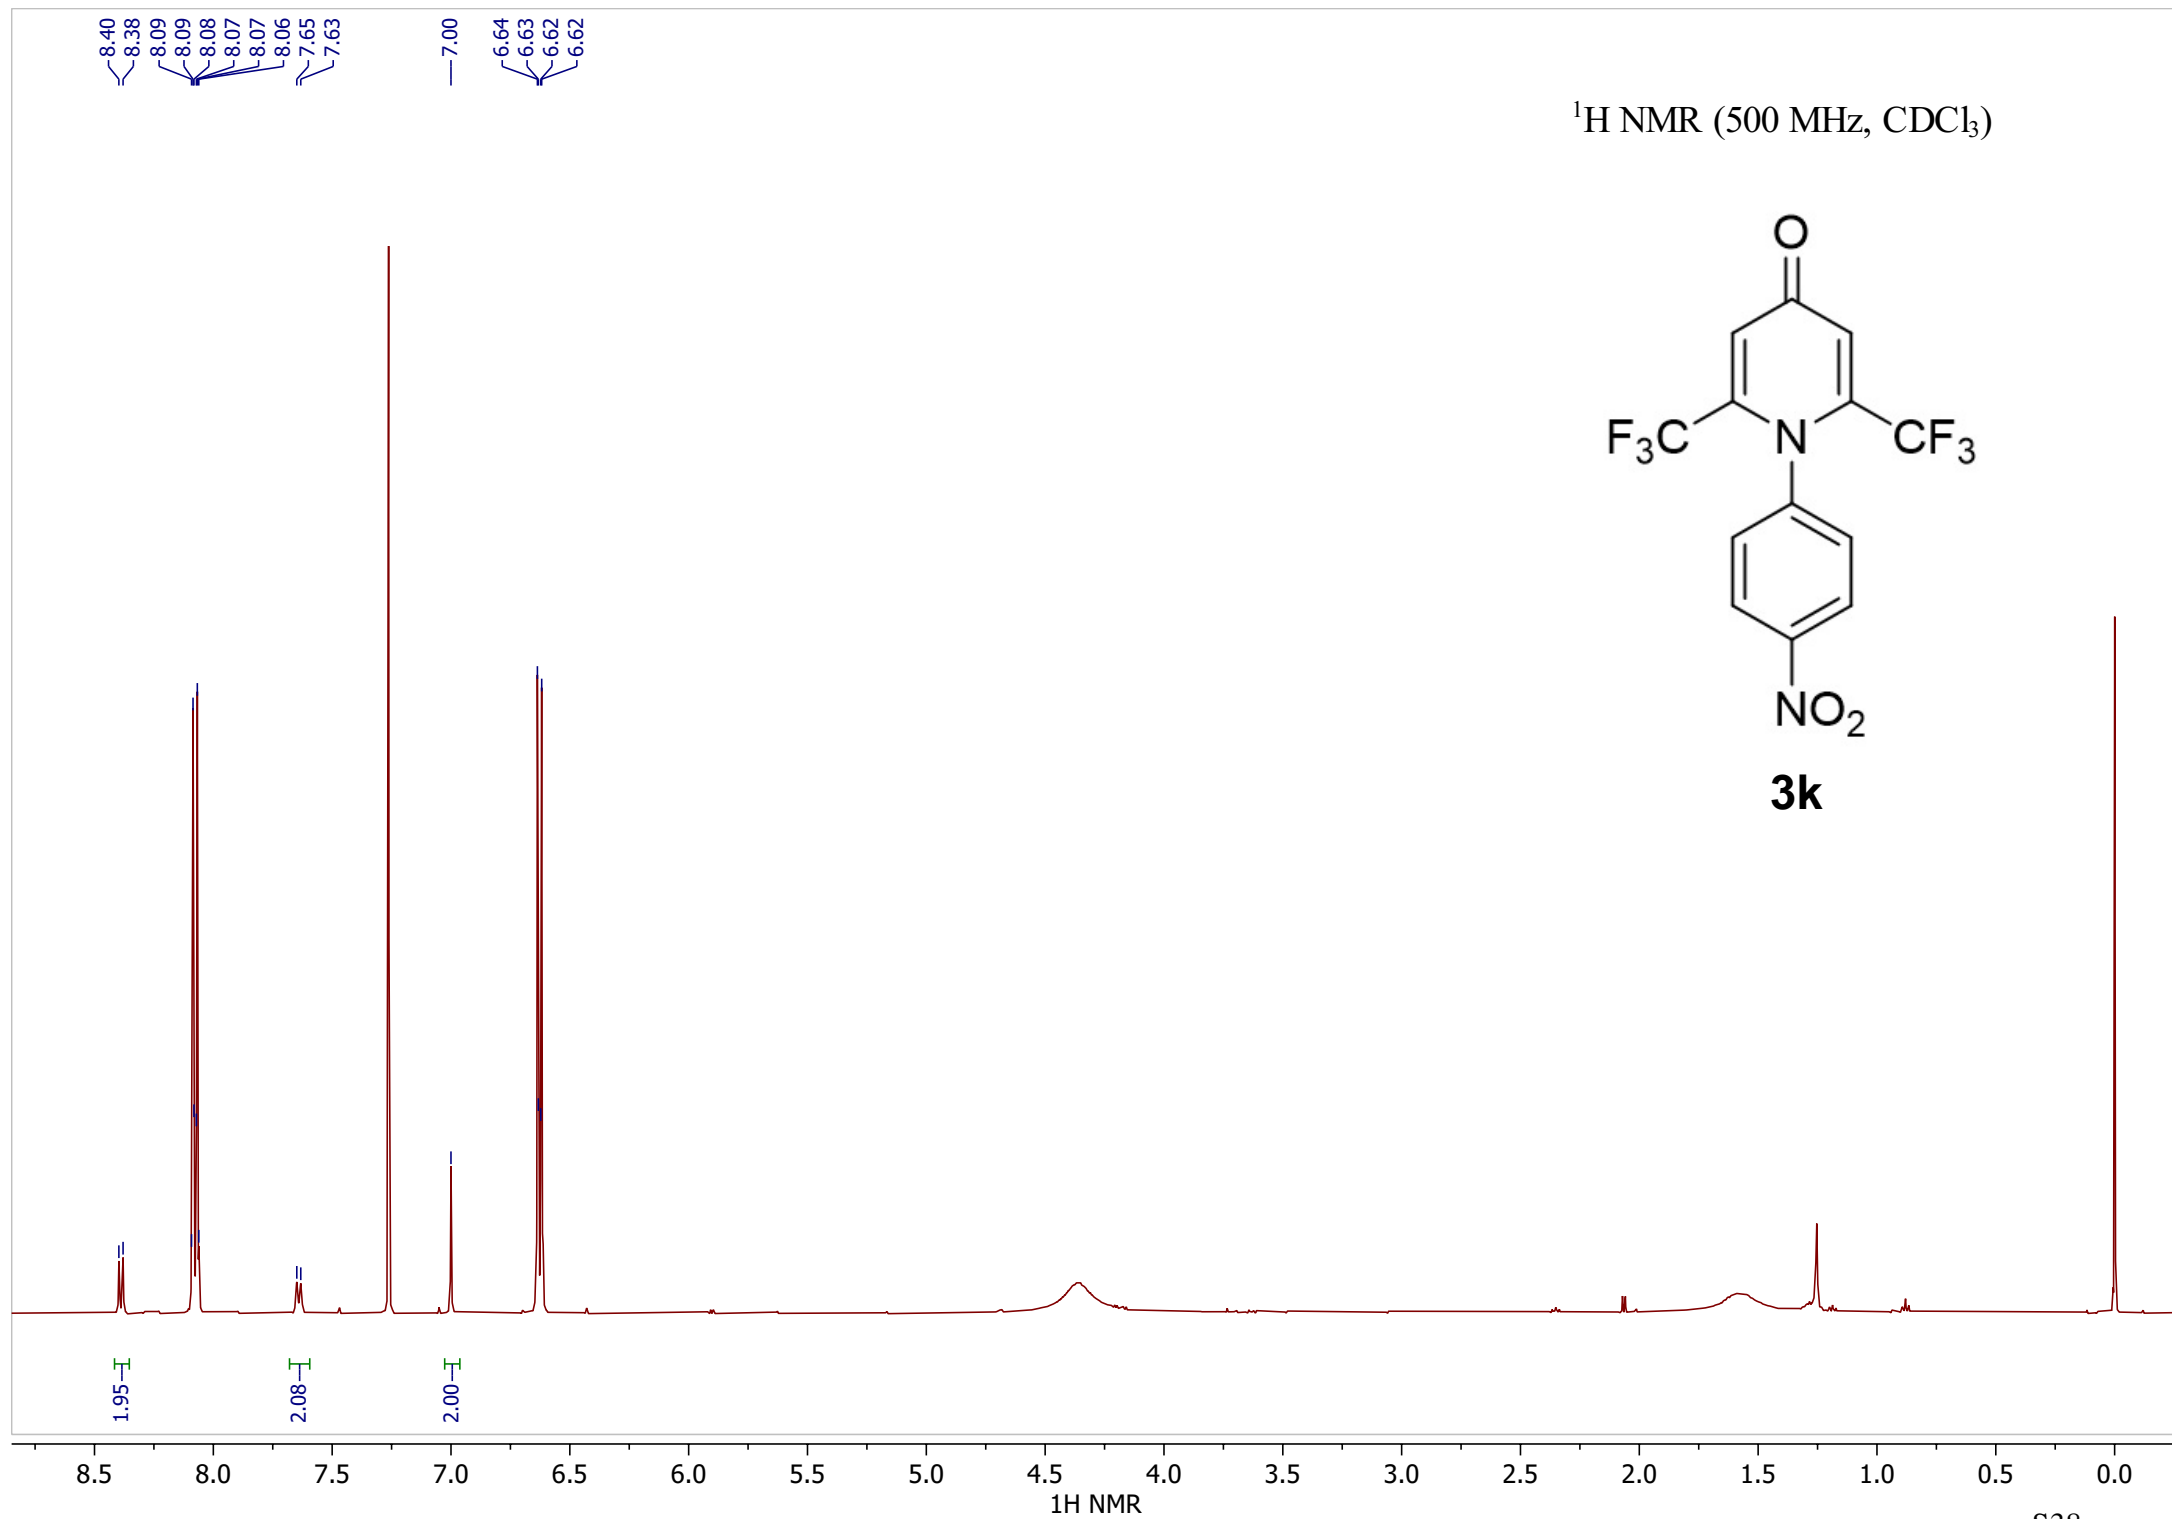

$^{19}\text{F}$  NMR (471 MHz,  $\text{CDCl}_3$ )

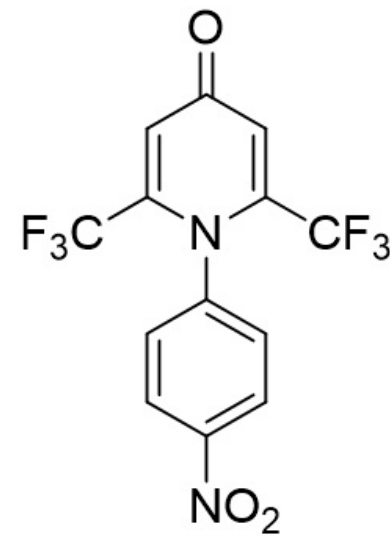

**3k**

— 100.91

$^{19}\text{F}$  NMR

S39

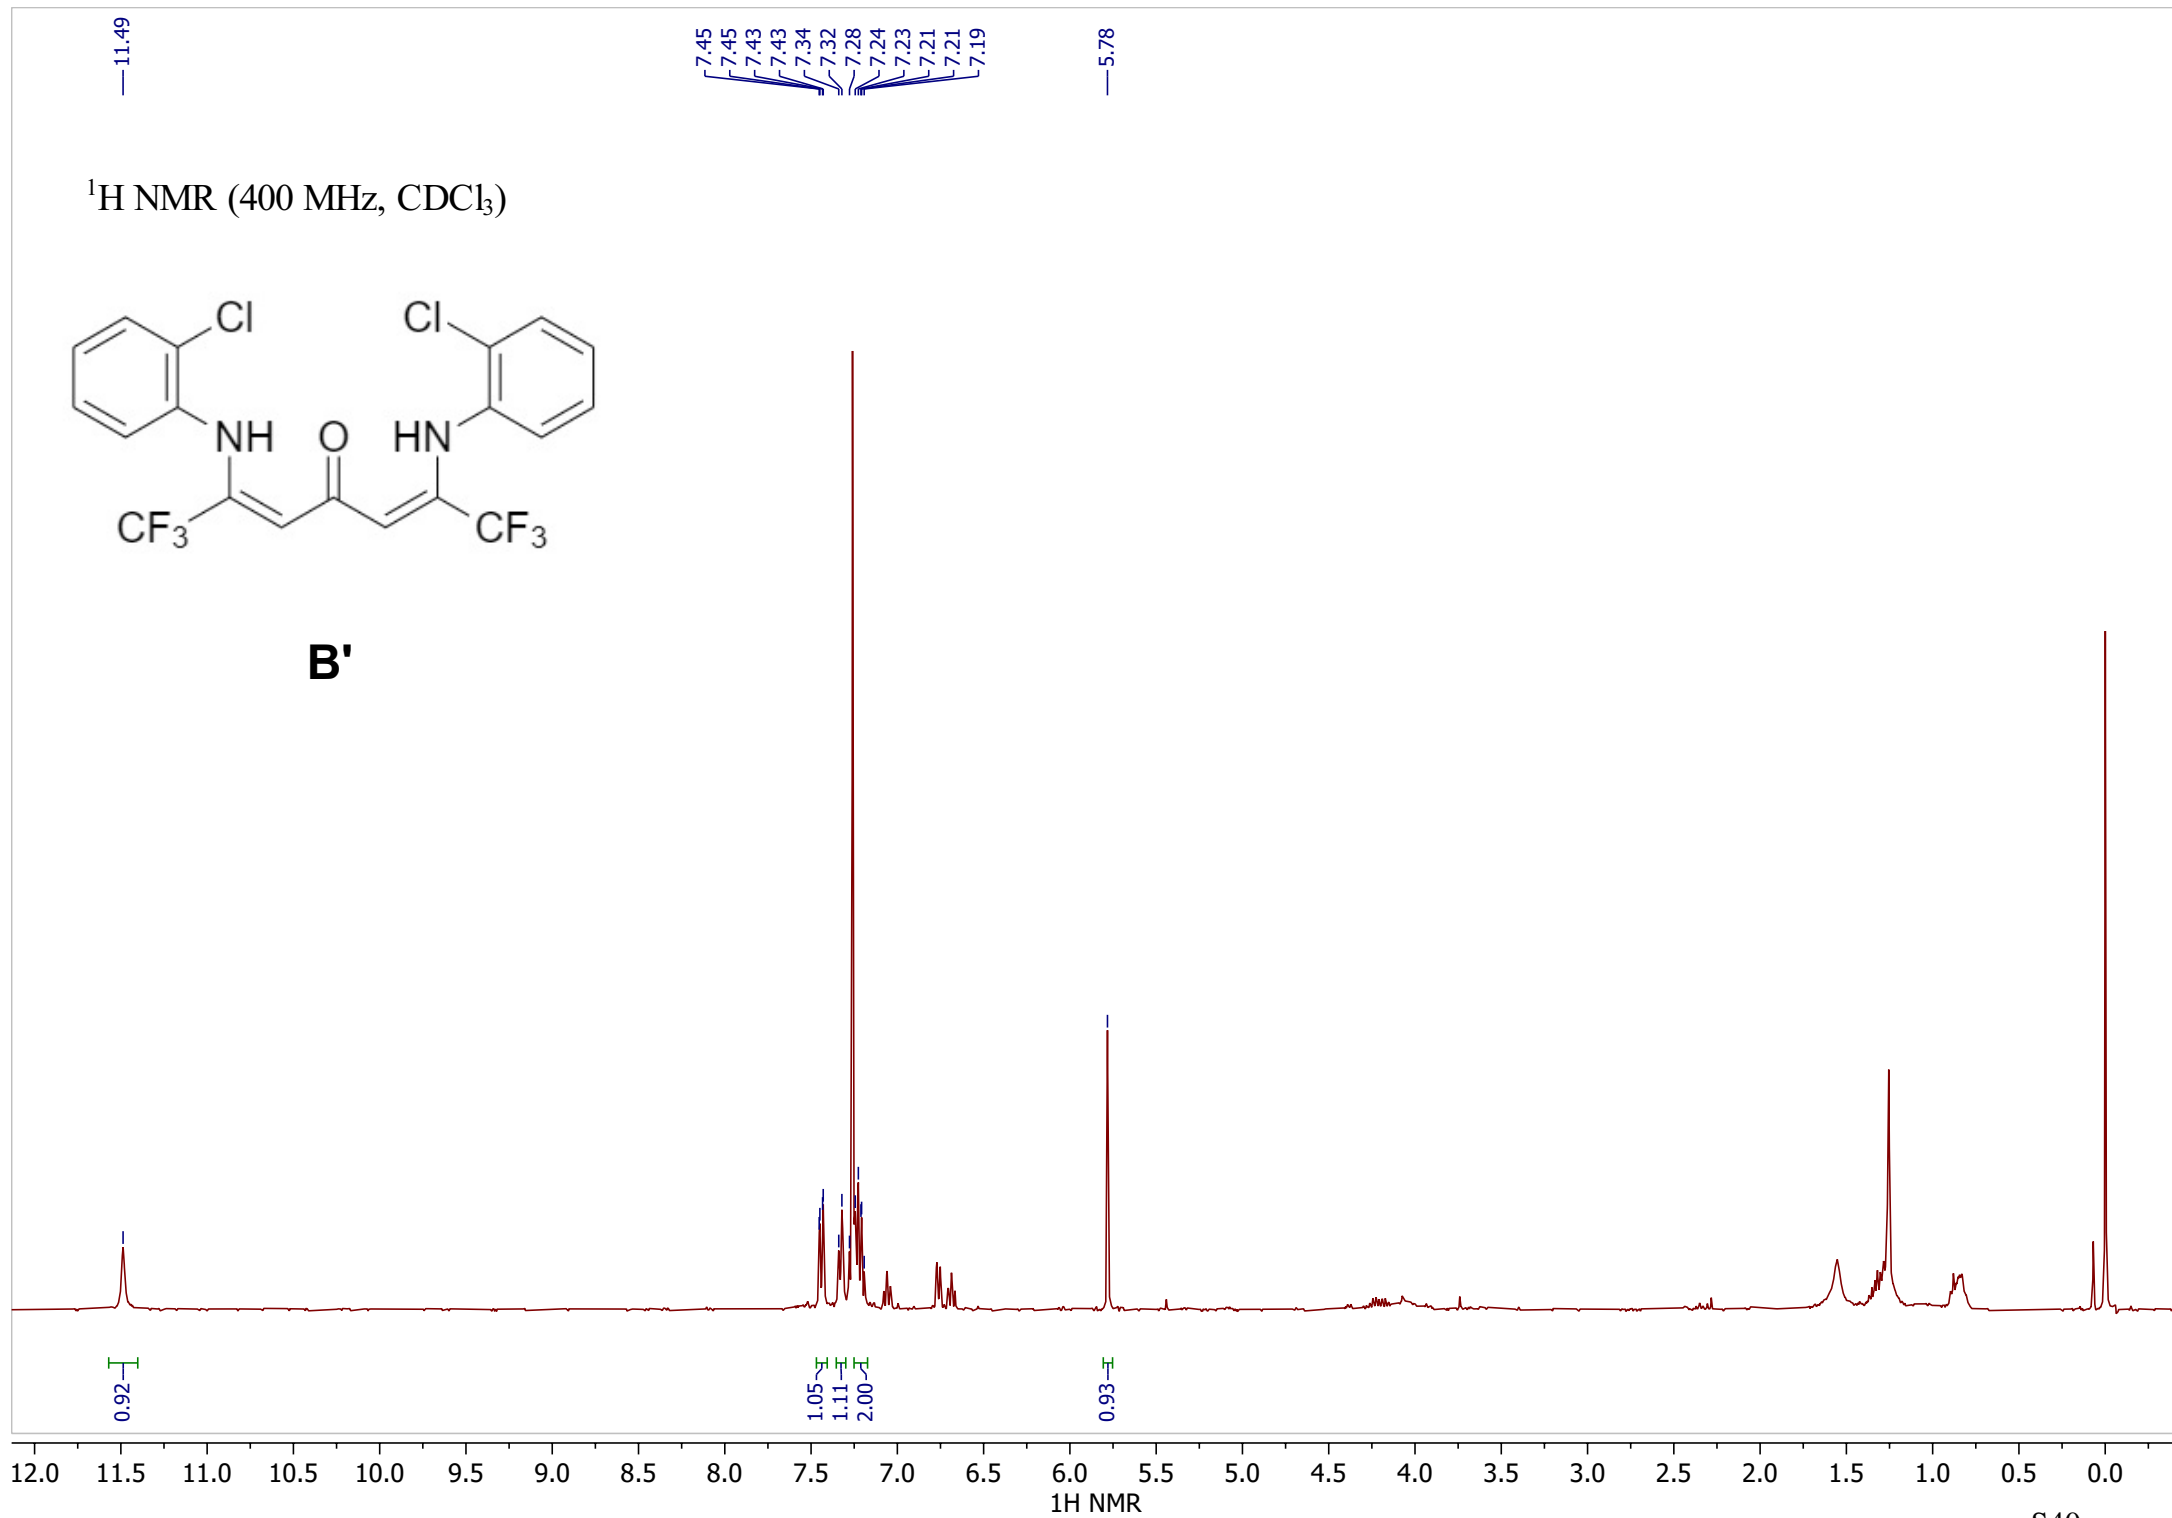



$^{19}\text{F}$  NMR (376 MHz,  $\text{CDCl}_3$ )

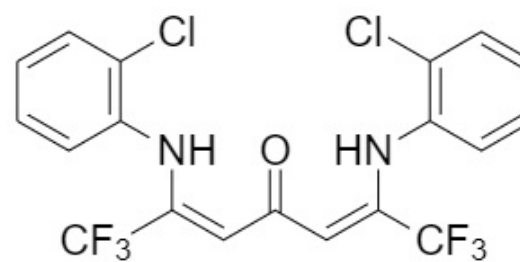

**B'**

— 97.83

110 105 100 95 90 85 80 75 70 65 60 55 50 45 40 35 30 25 20 15 10 5 0 -5 -10 -15

$^{19}\text{F}$  NMR

S41

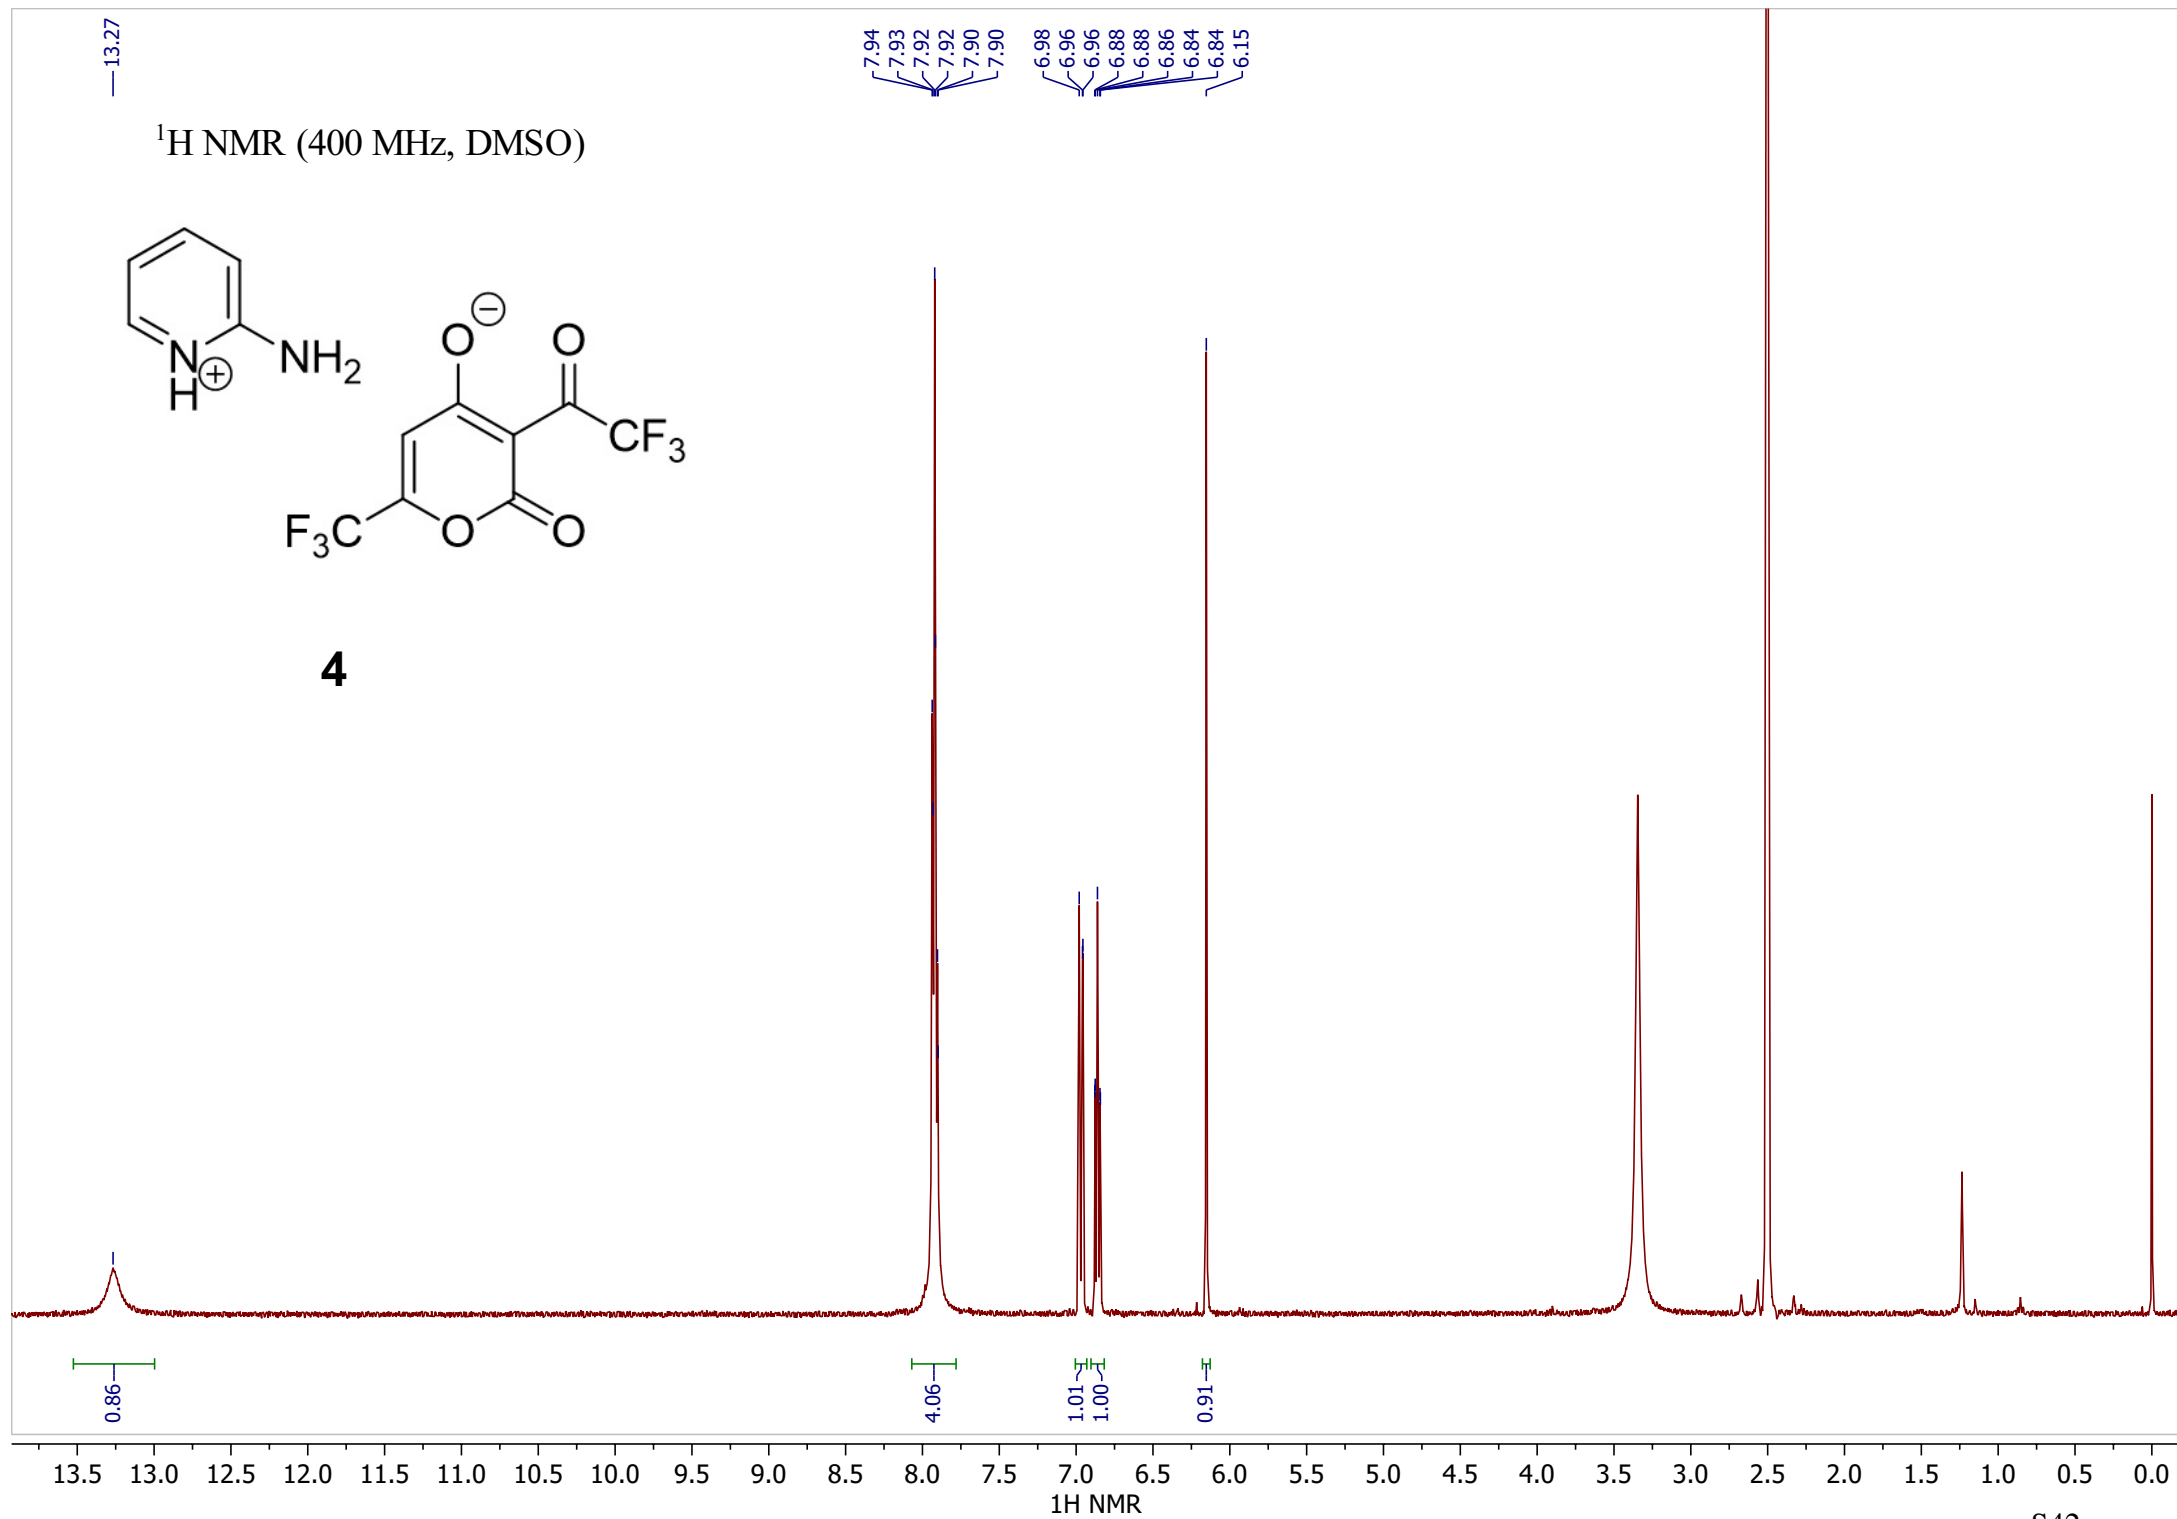

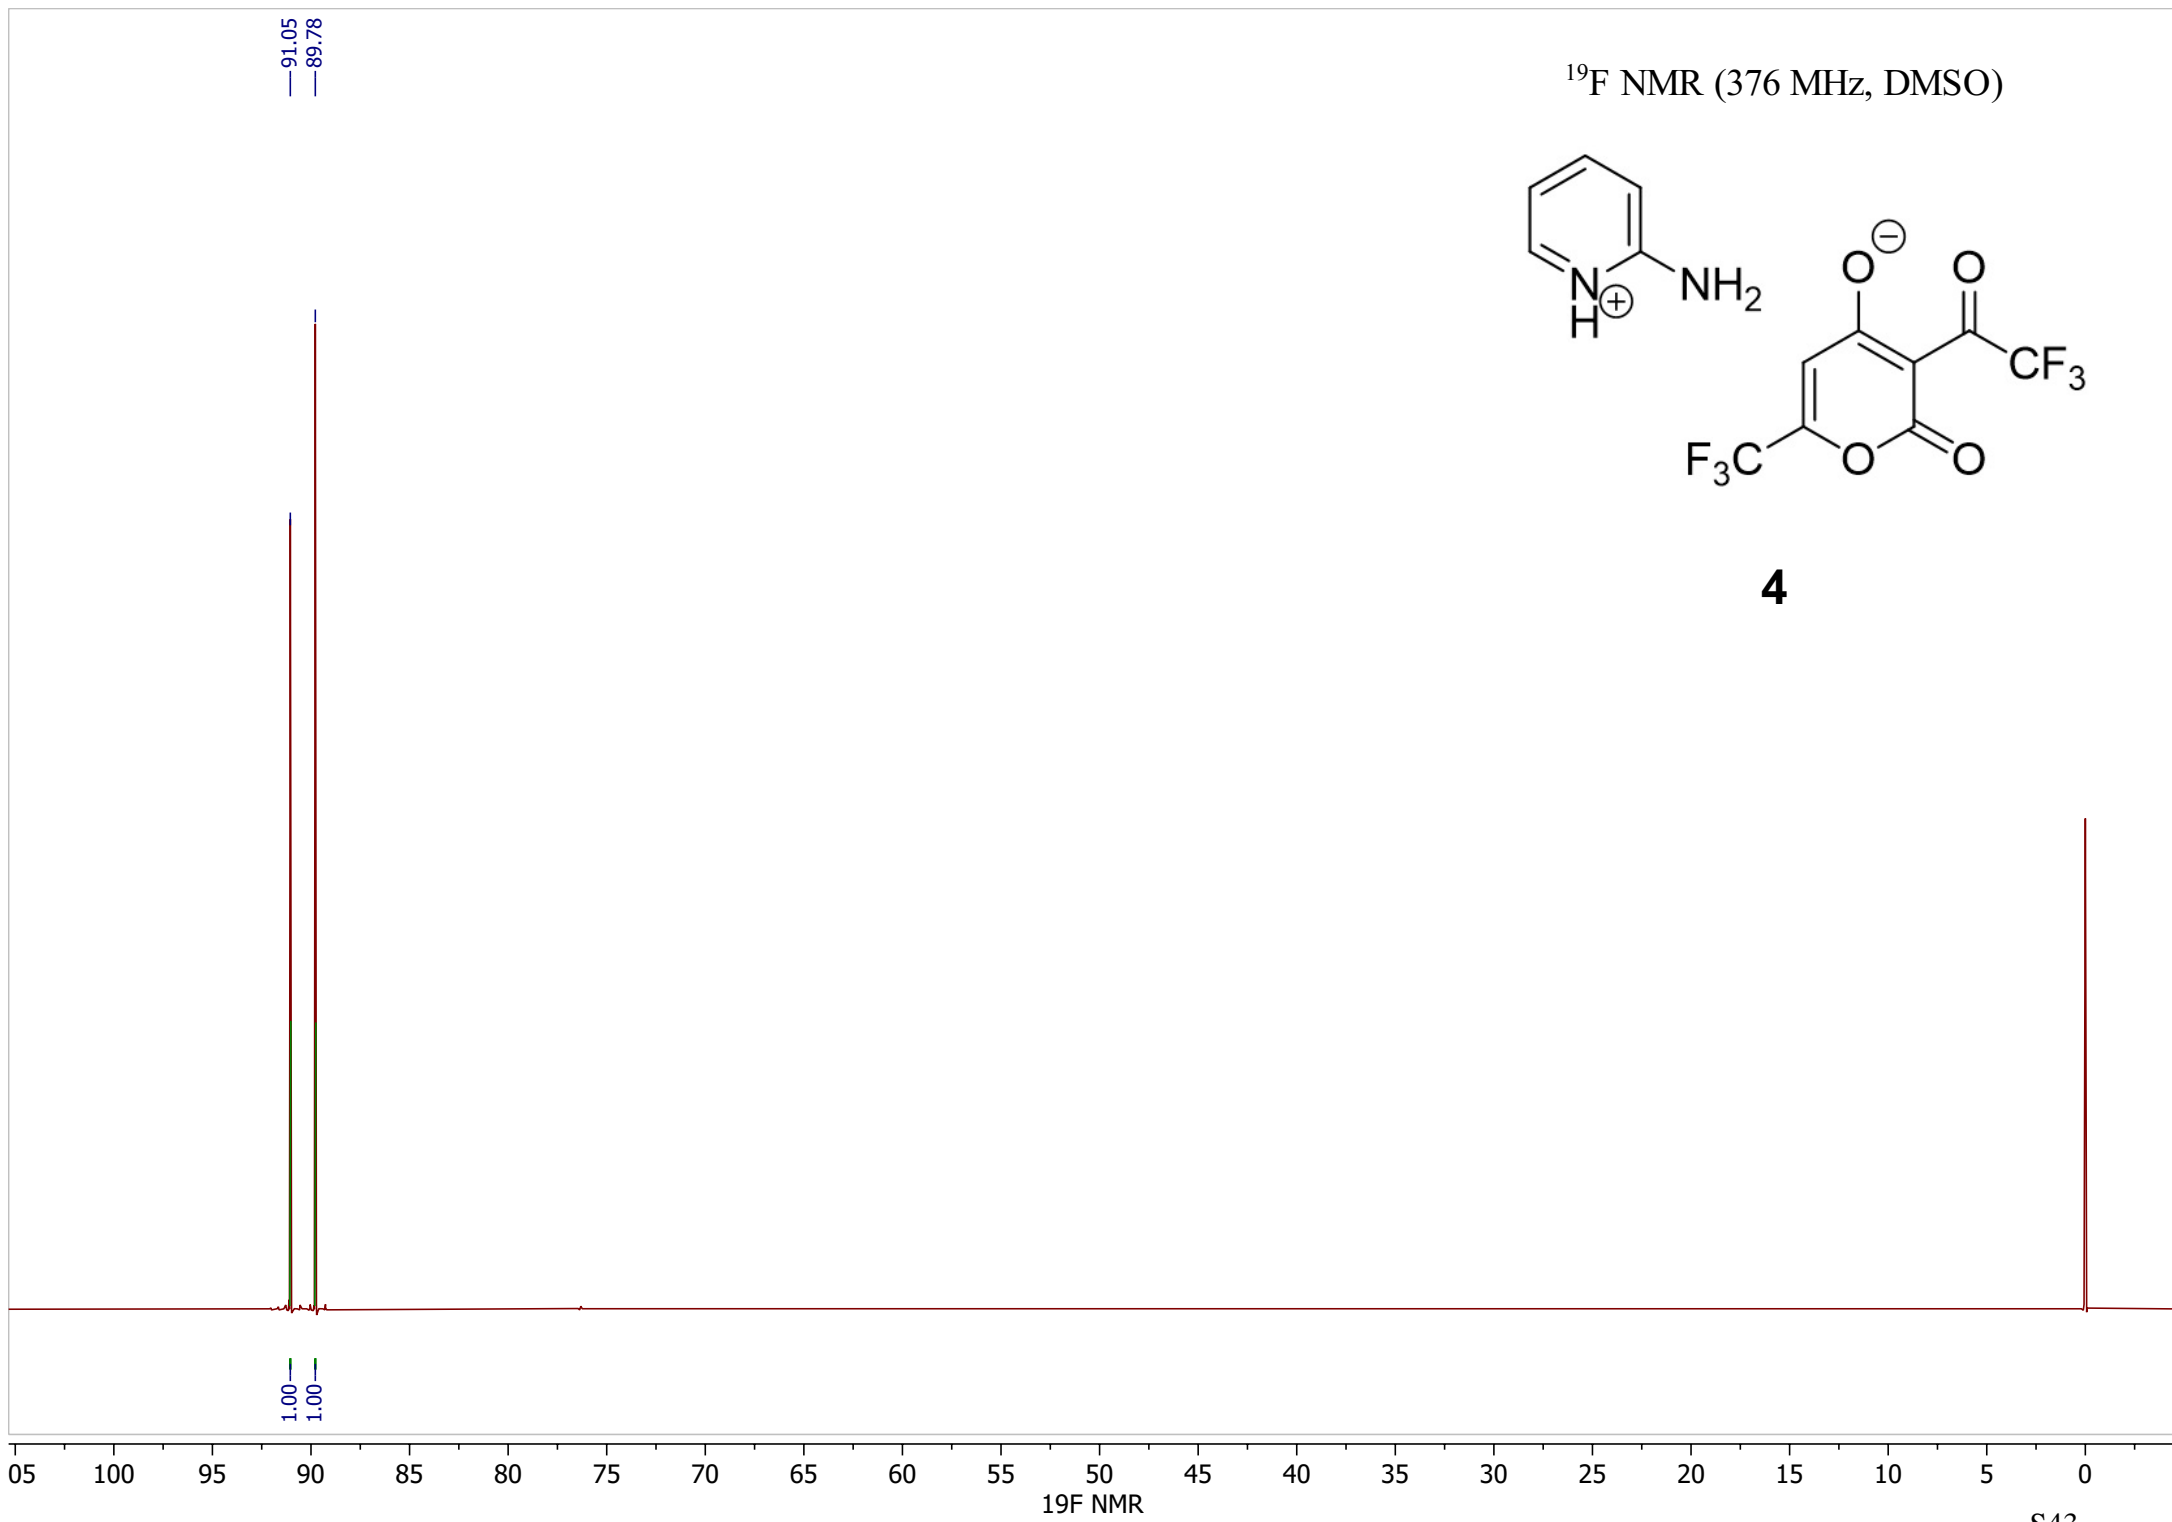

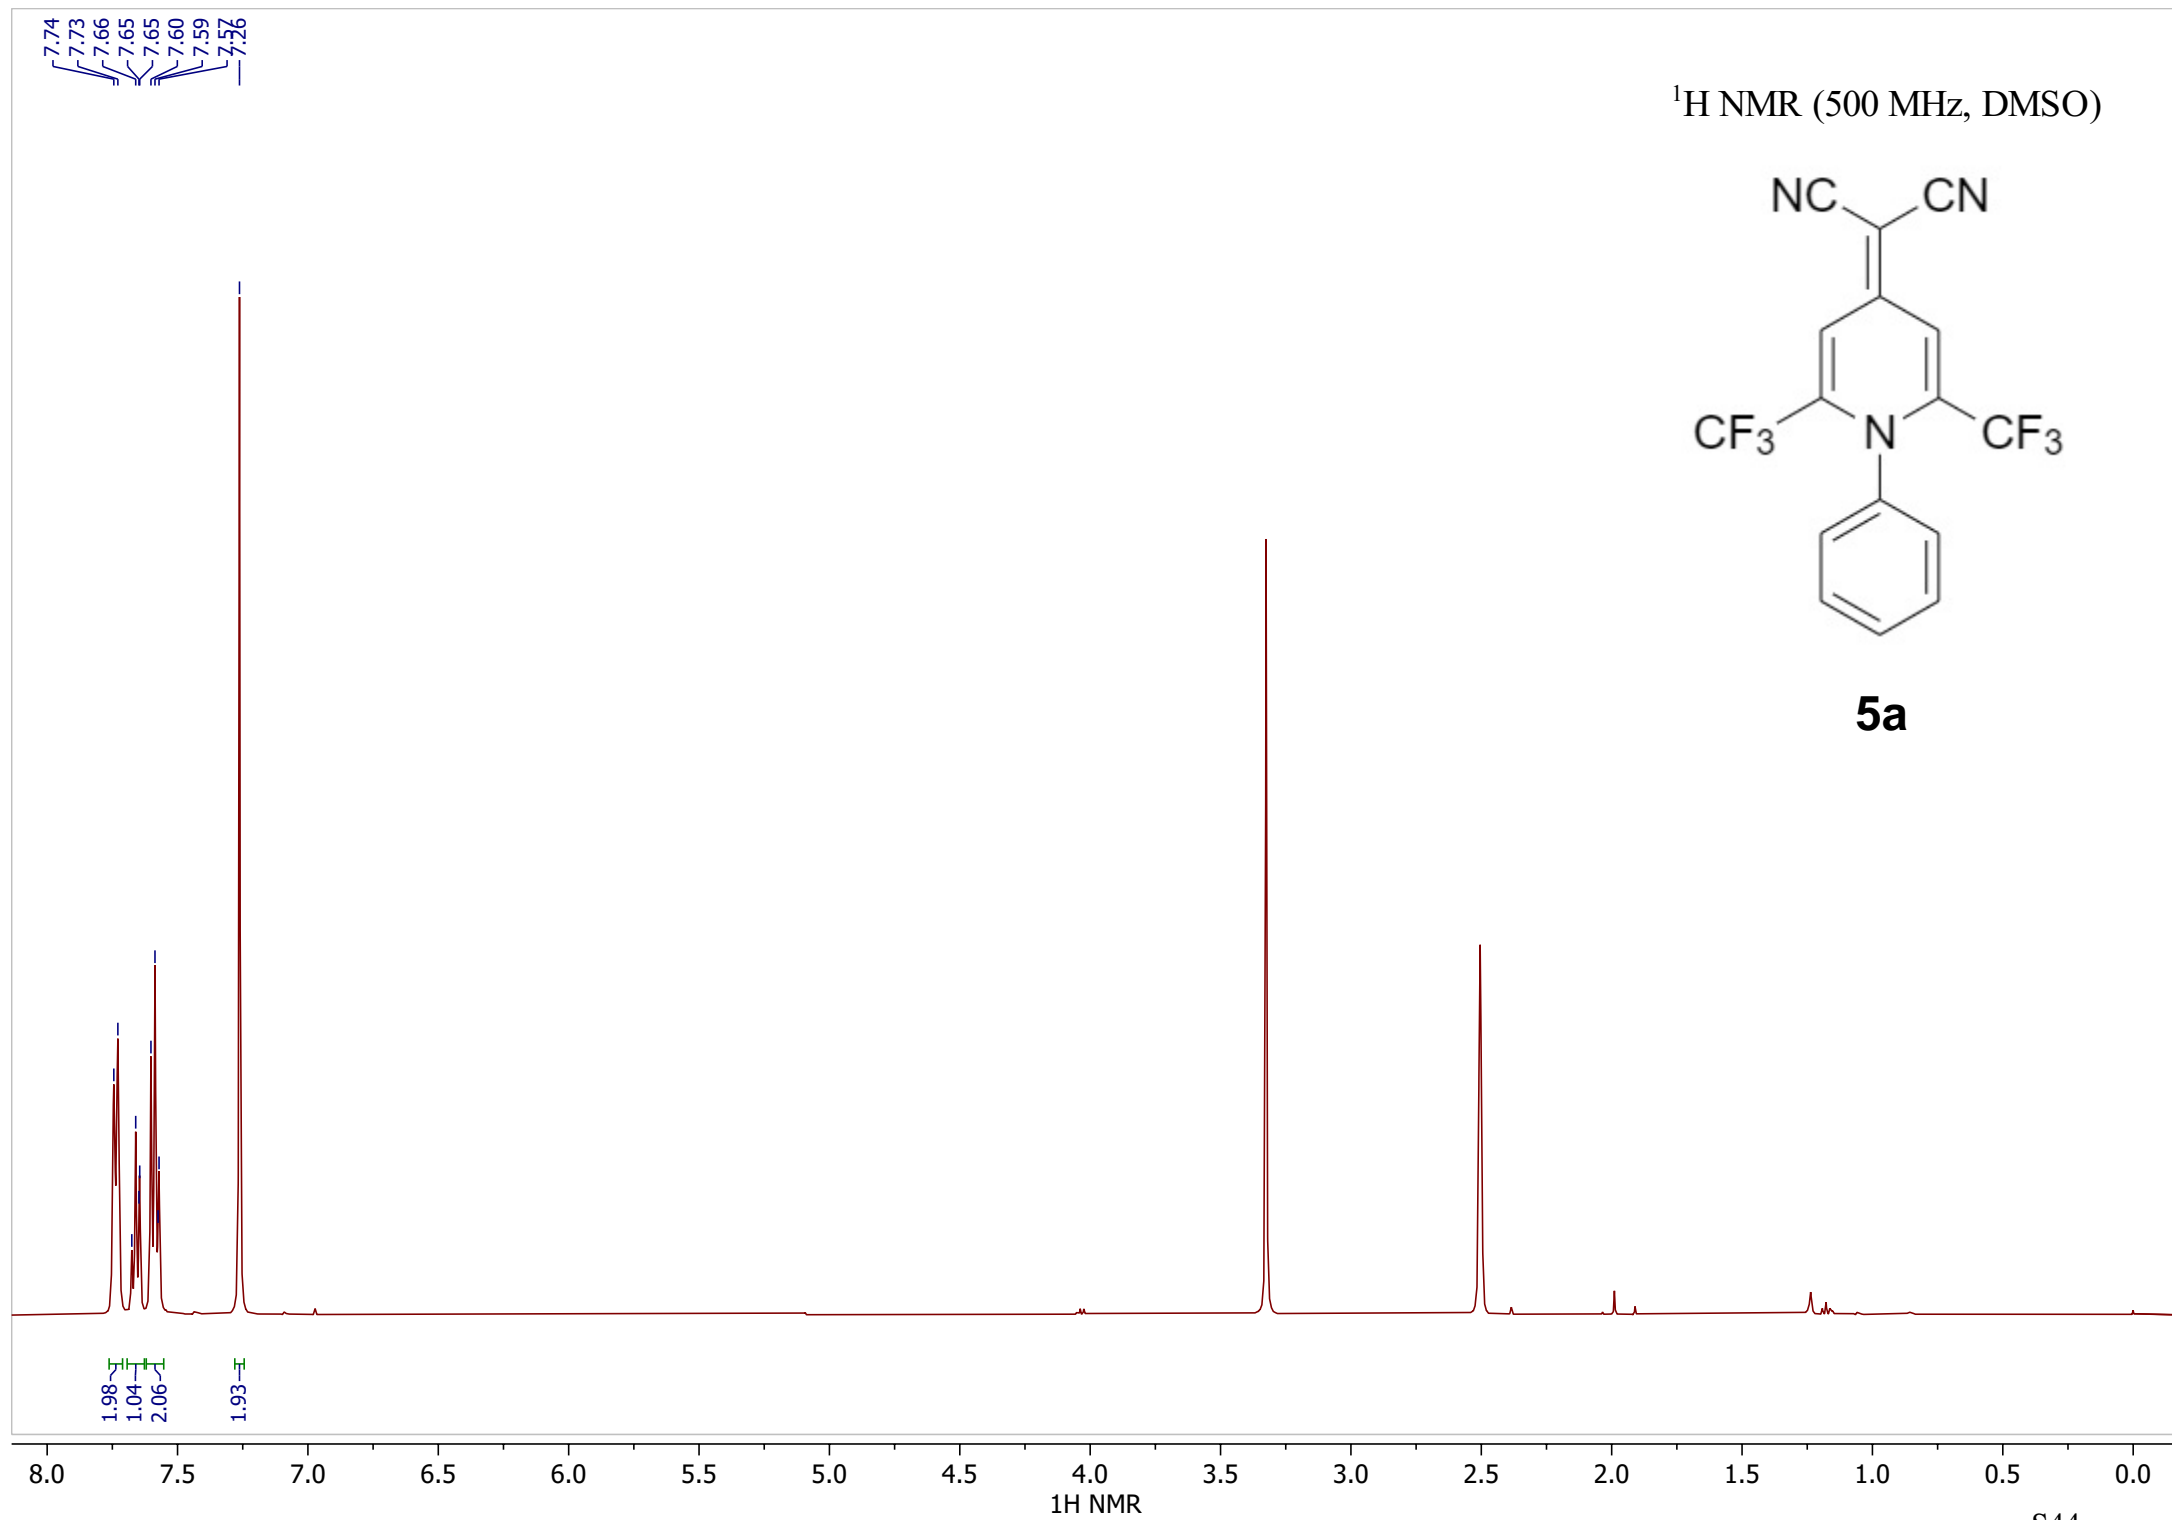

<sup>19</sup>F NMR (471 MHz, DMSO)

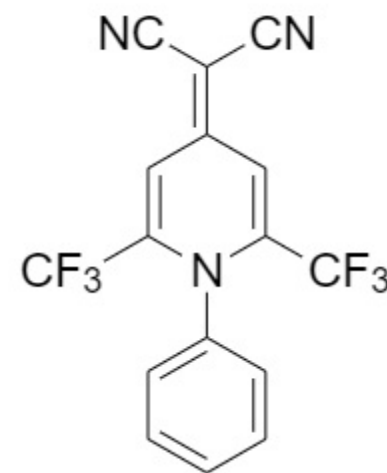

**5a**

— 102.54

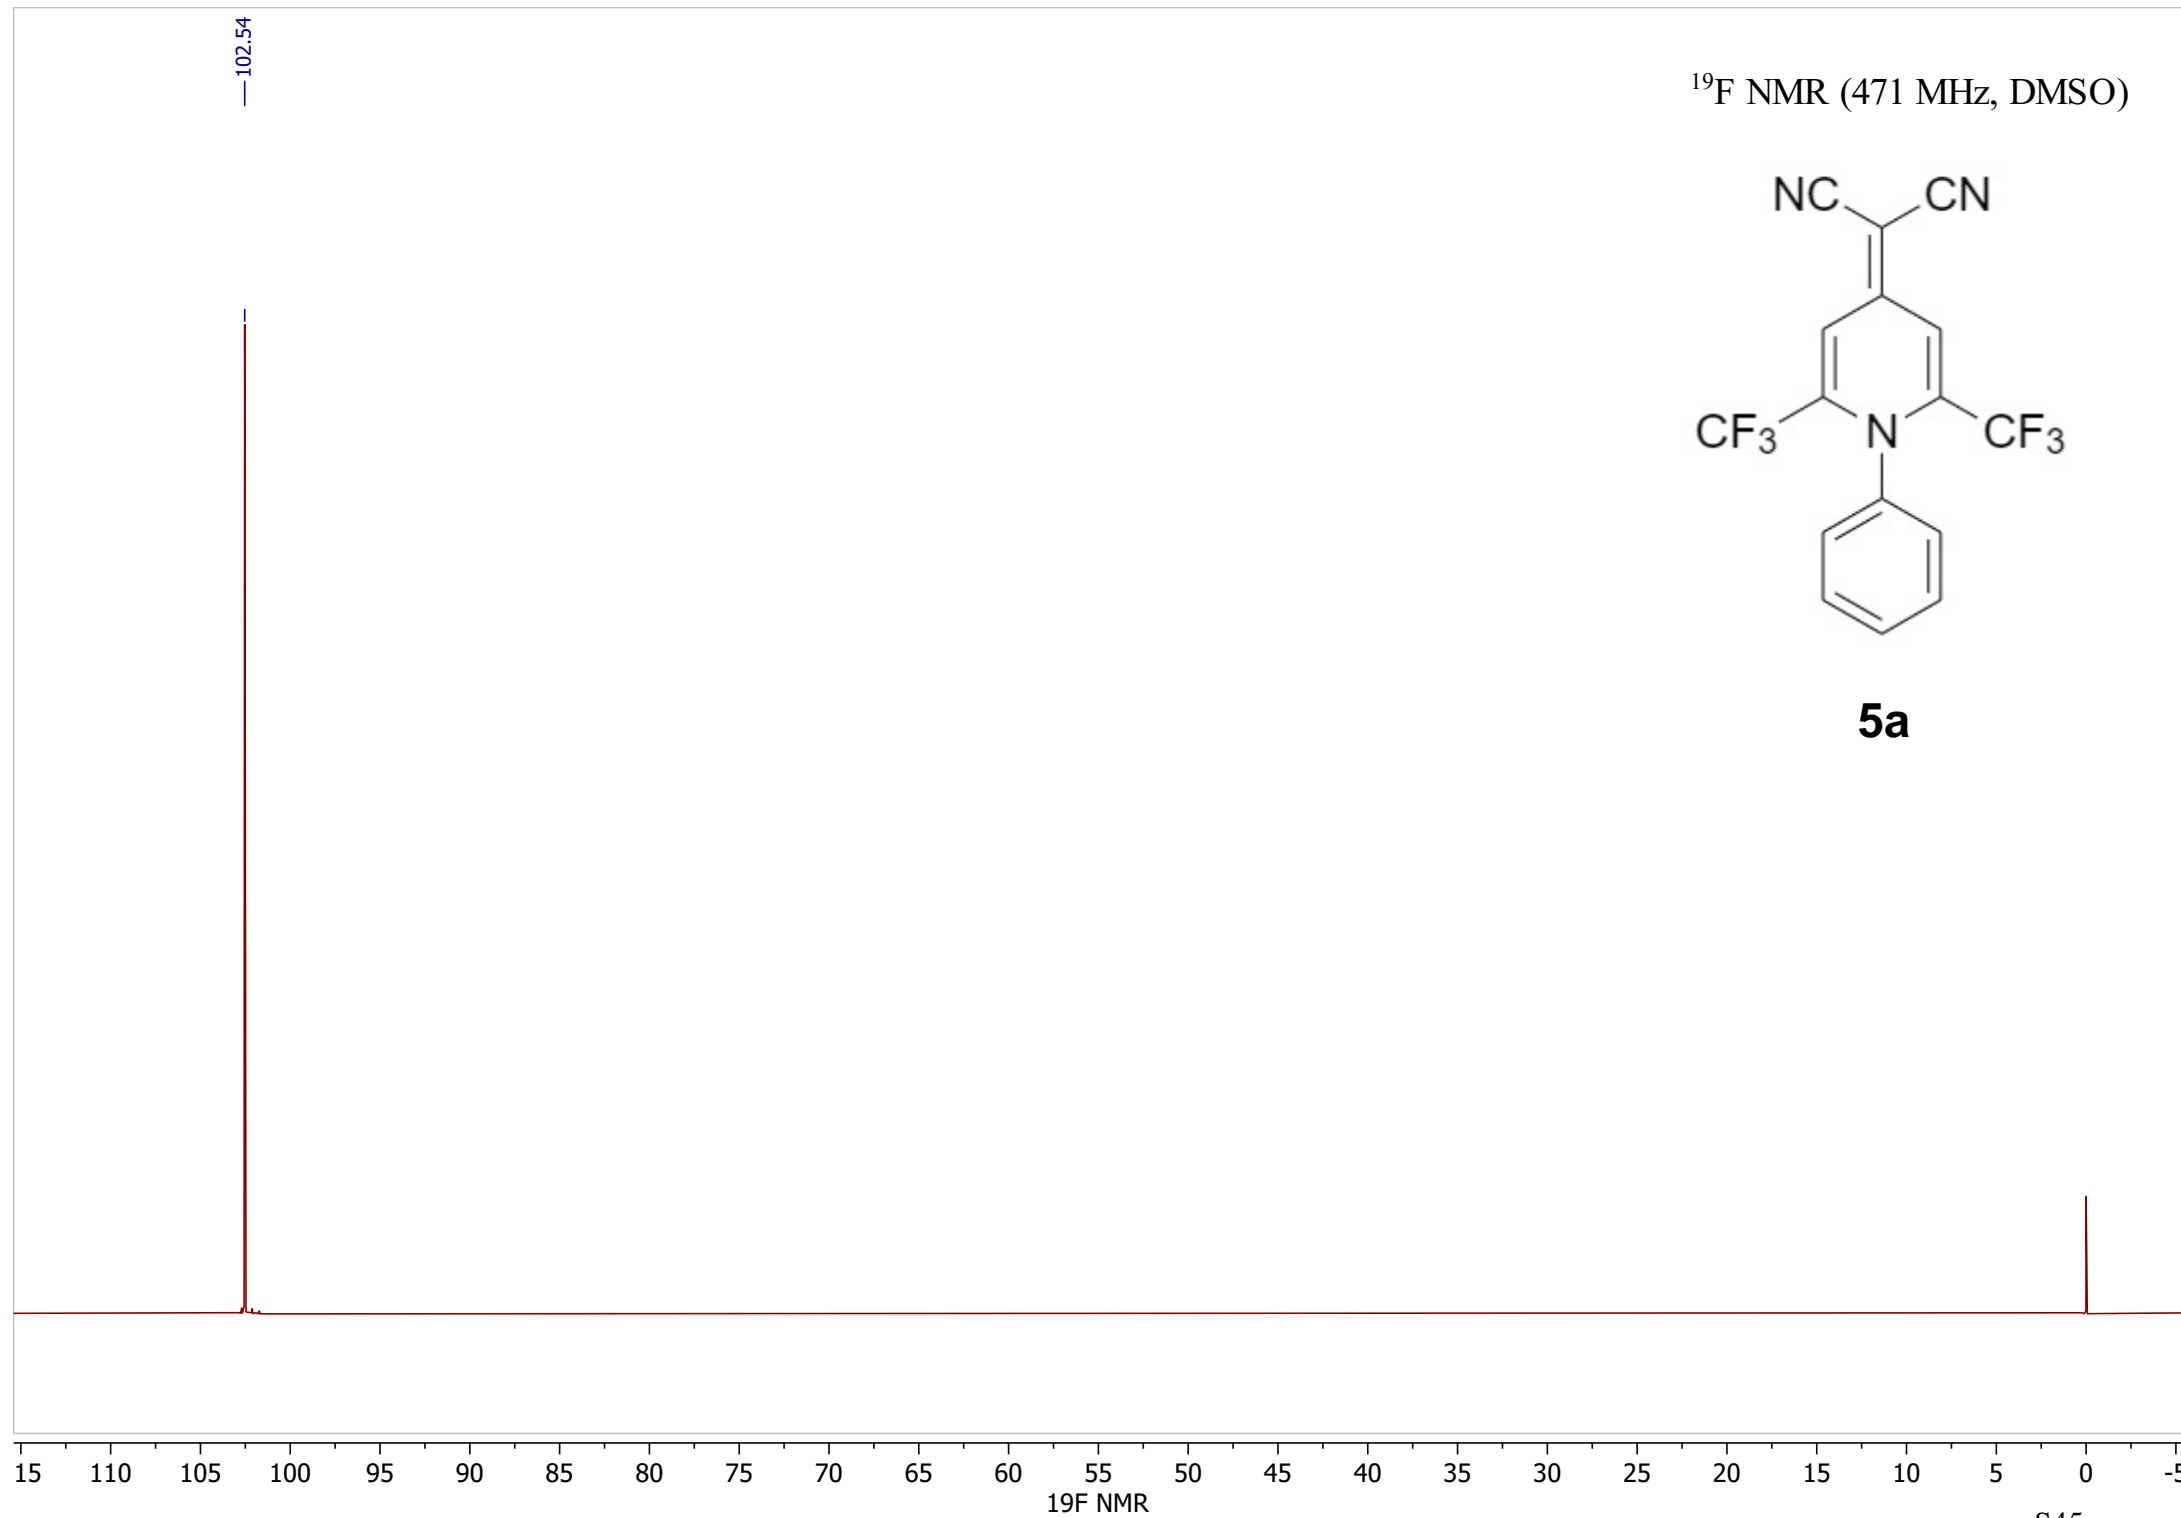

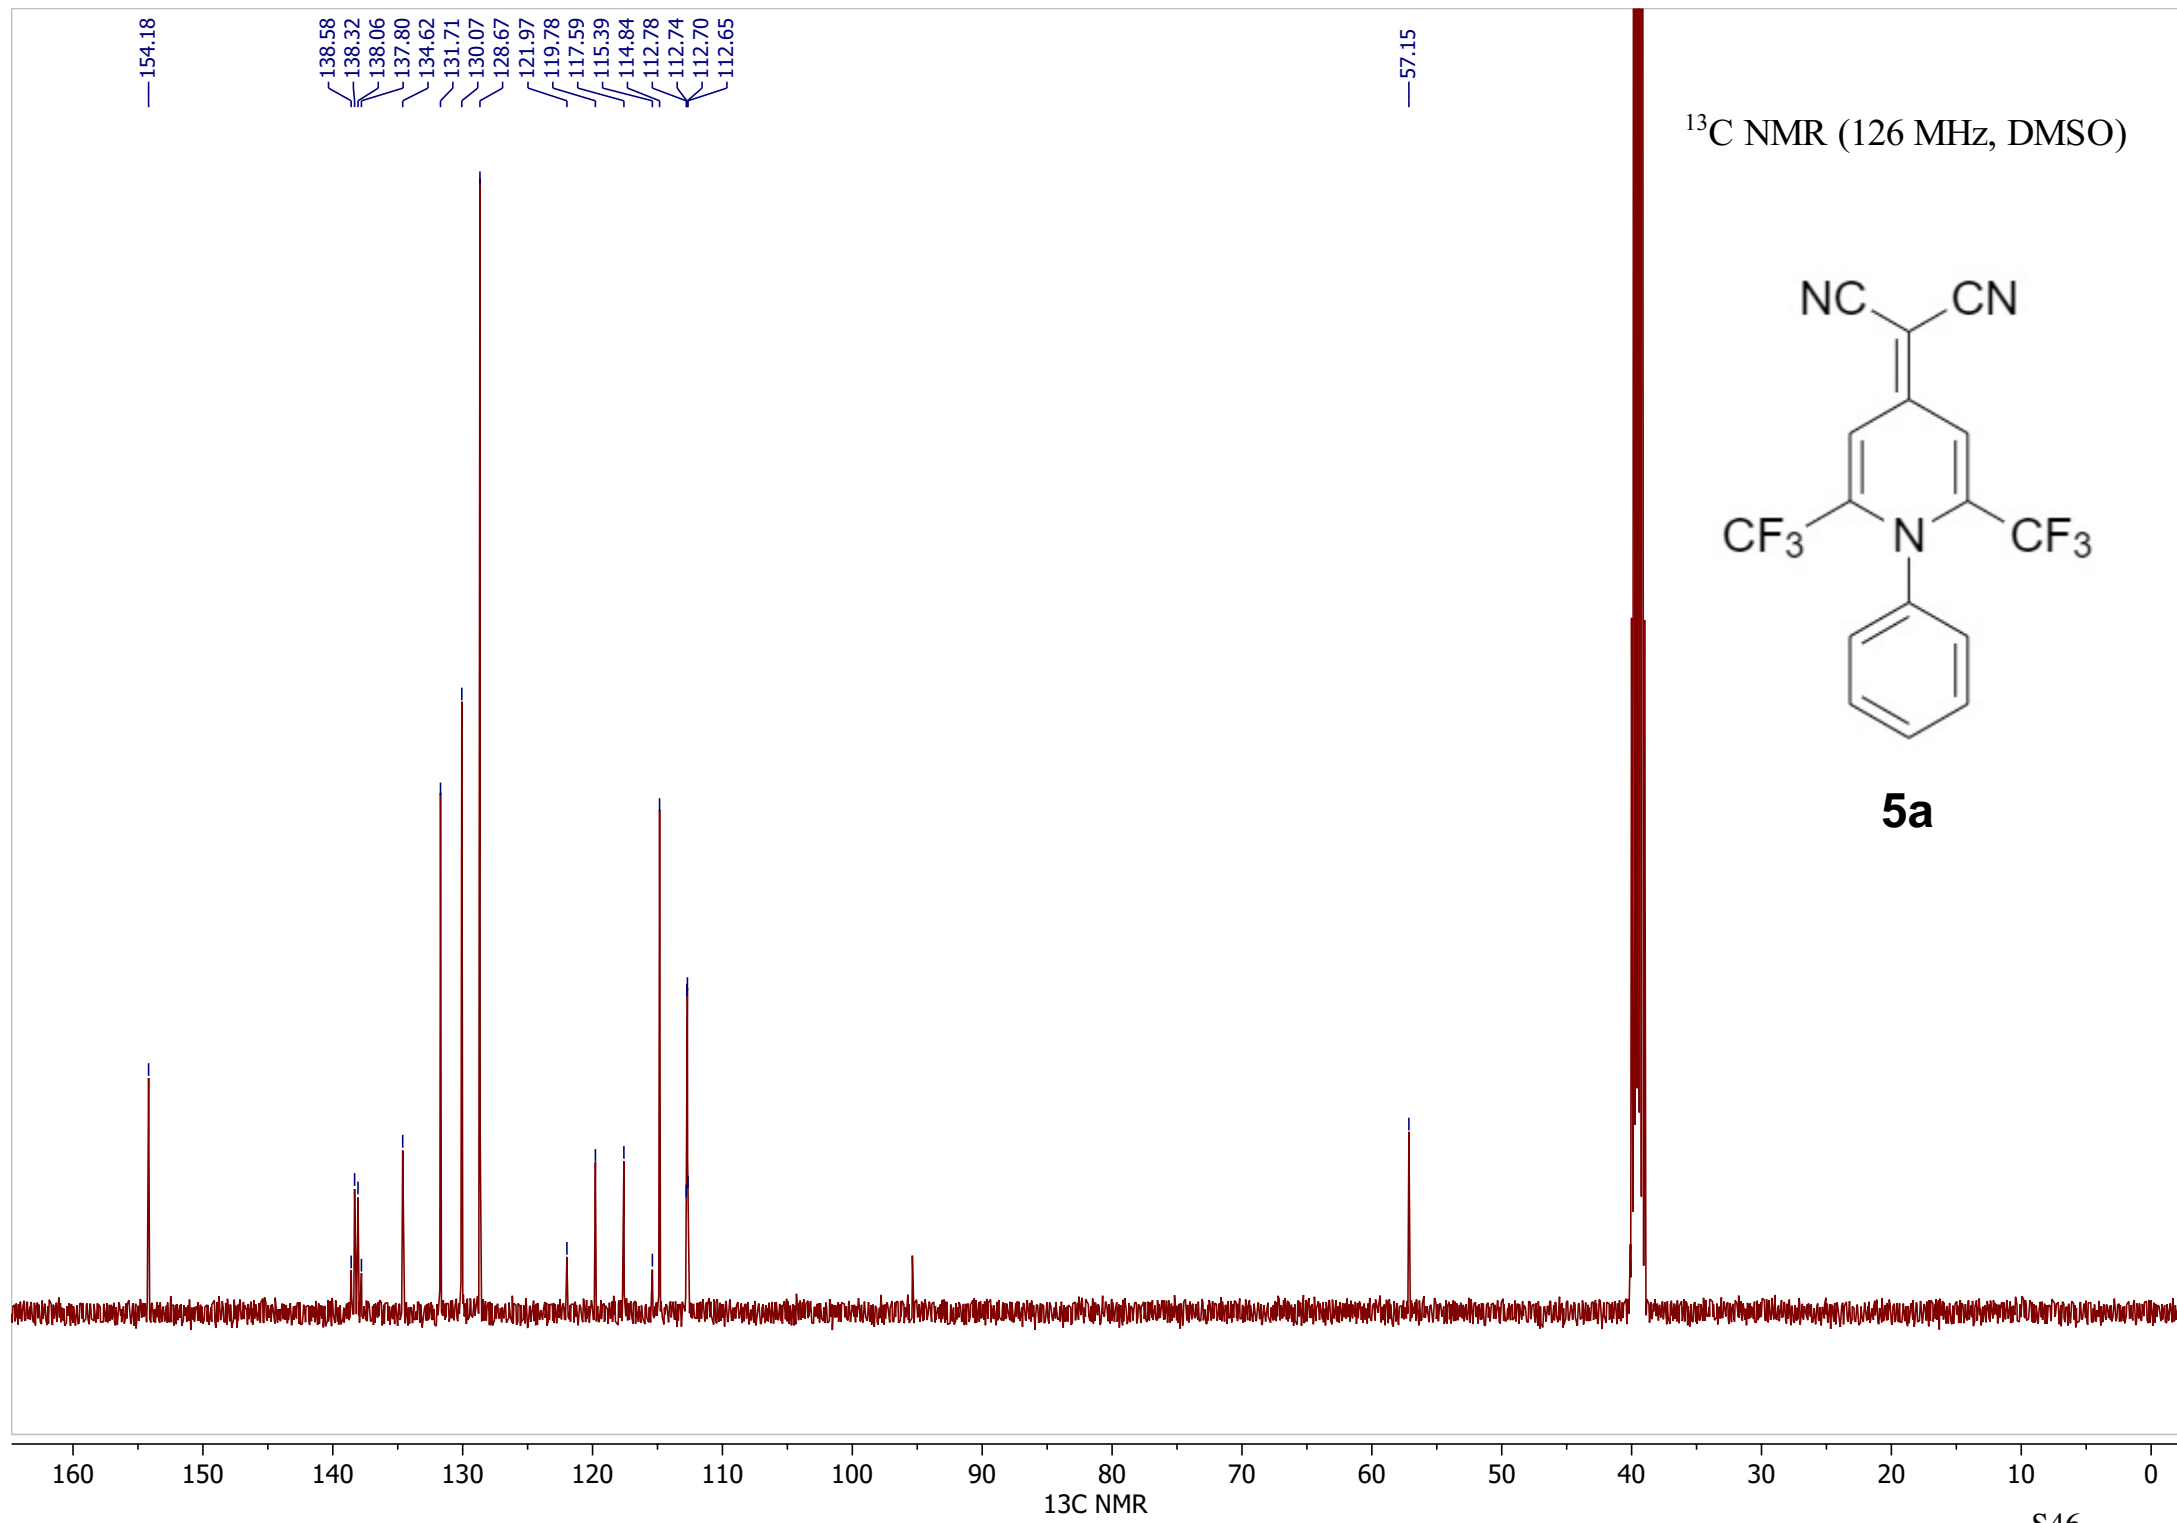

$^1\text{H}$  NMR (500 MHz, DMSO)

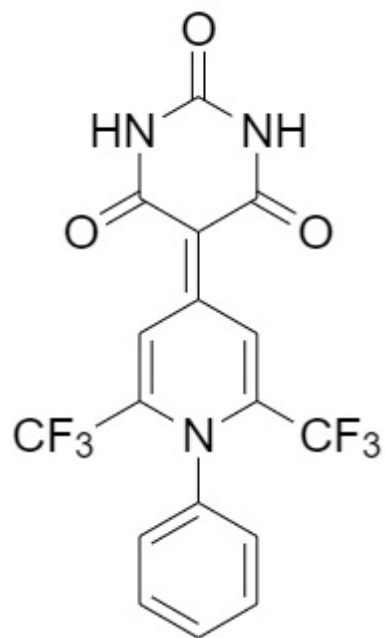

**5b**

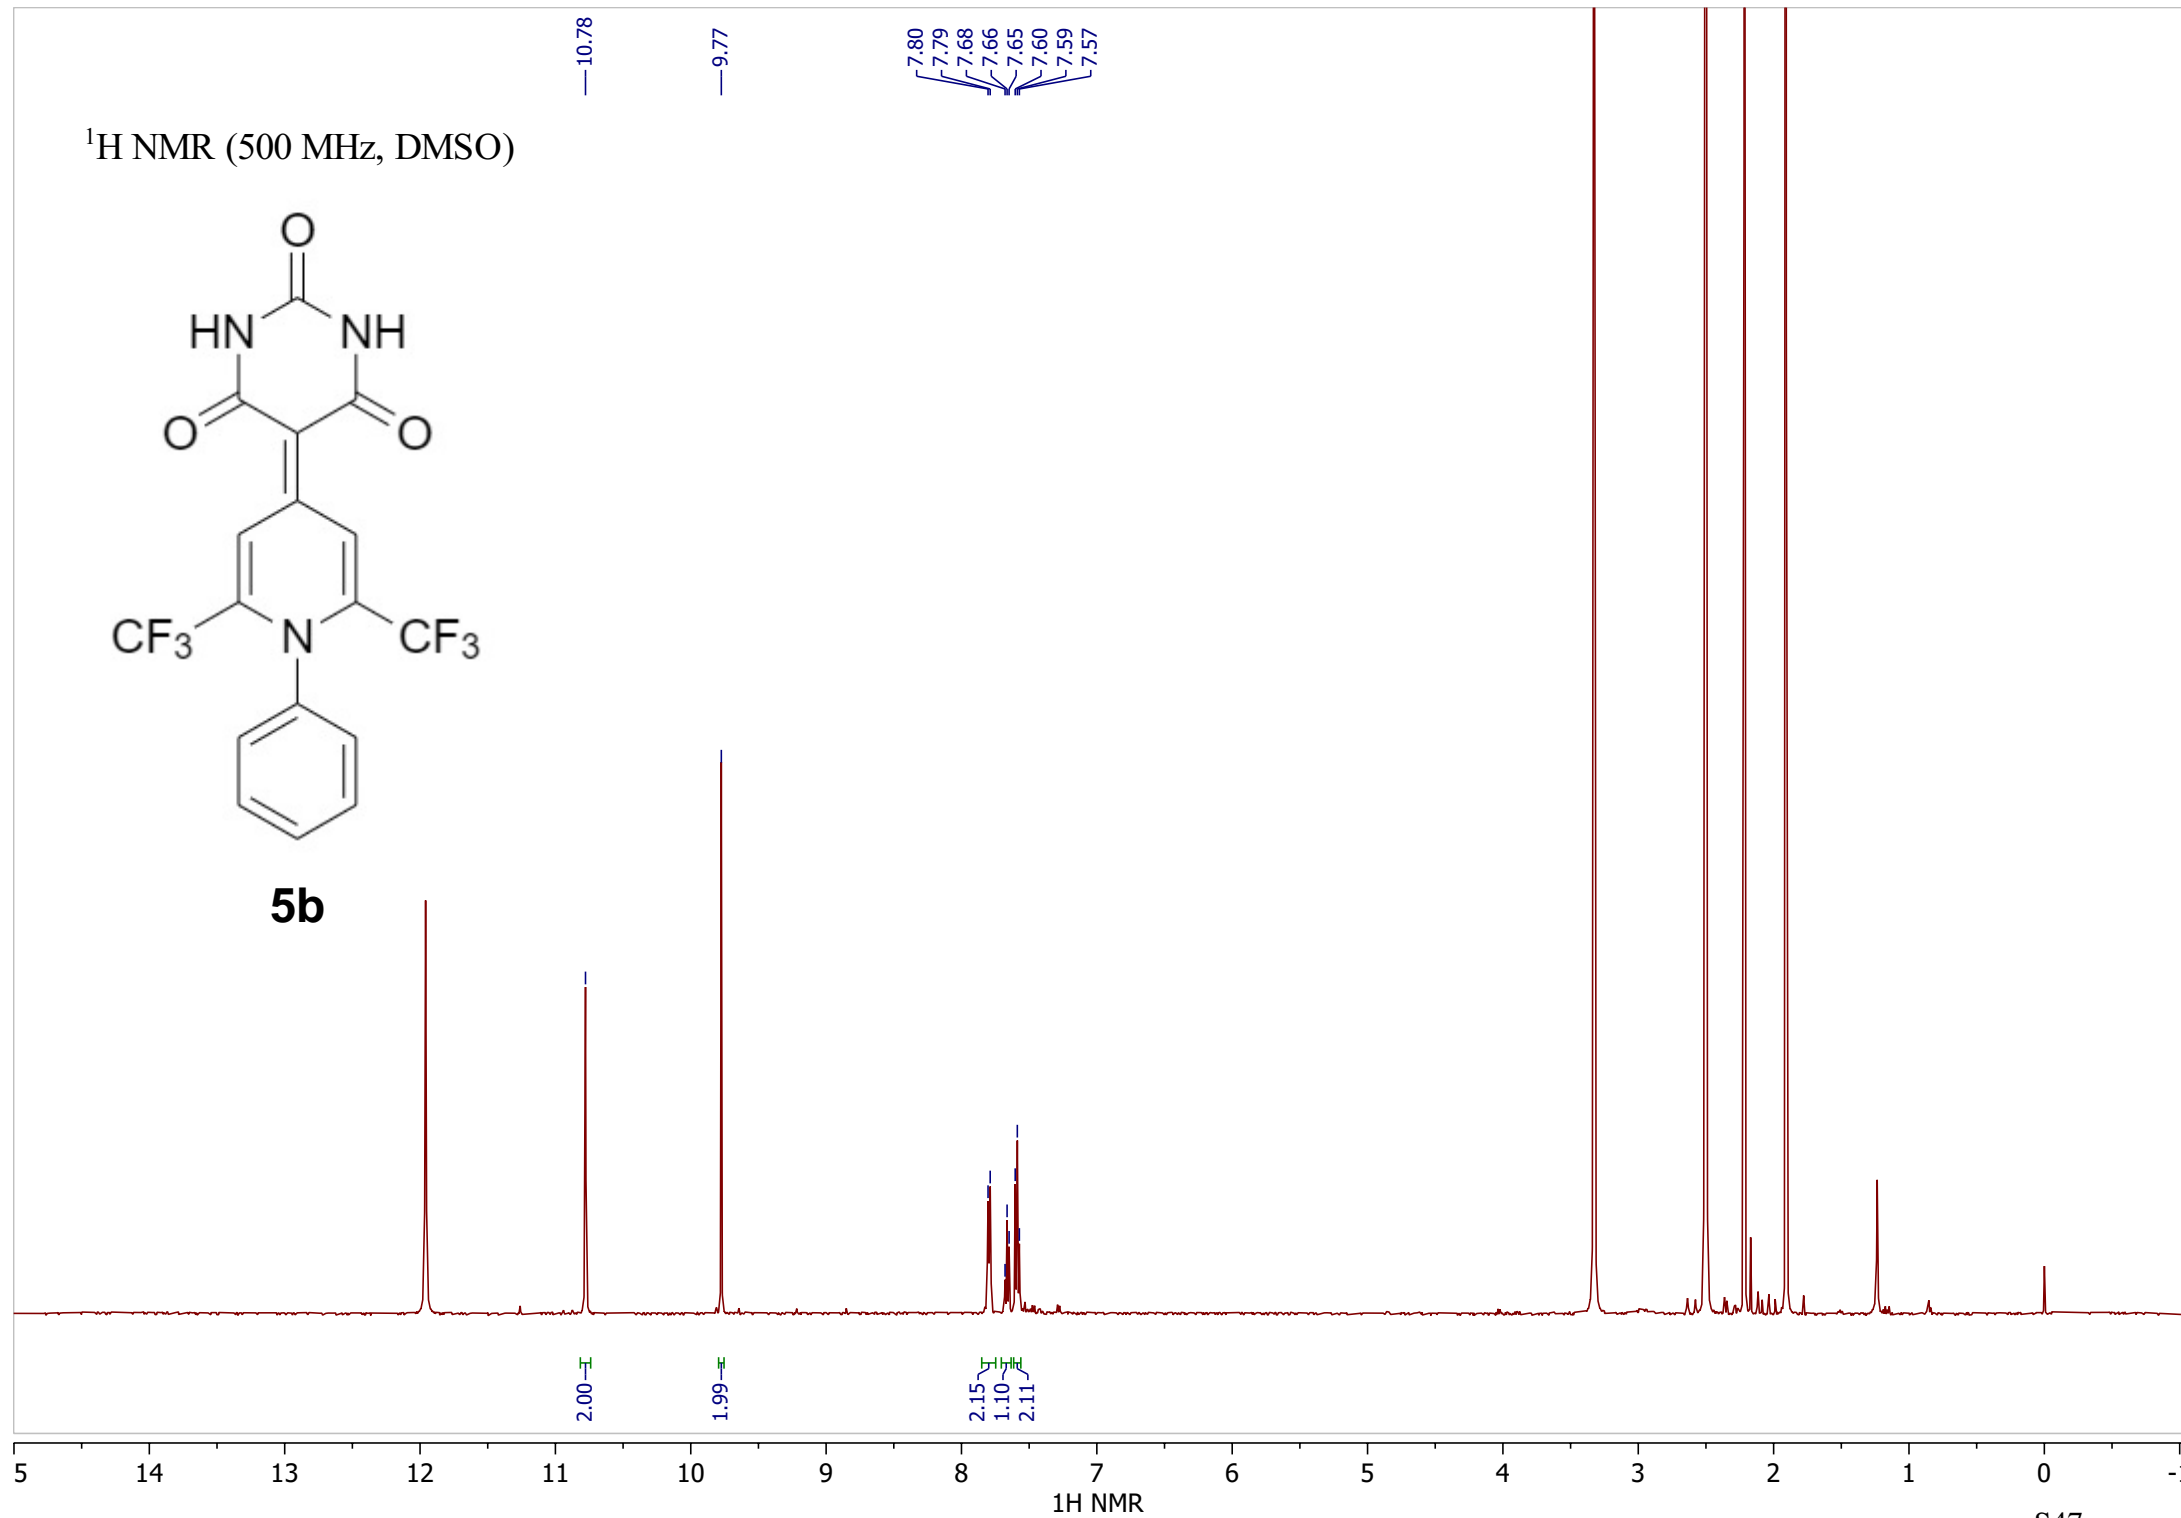

<sup>19</sup>F NMR (471 MHz, DMSO)

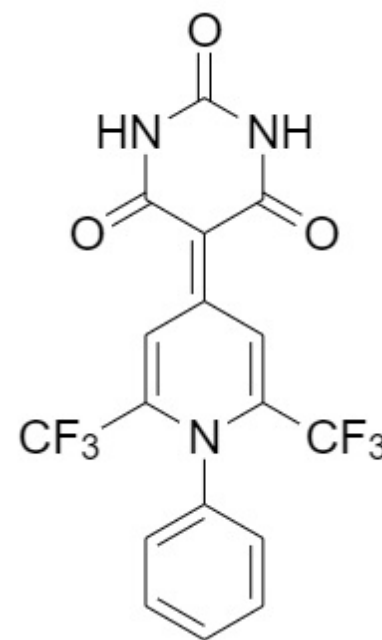

**5b**

— 103.17

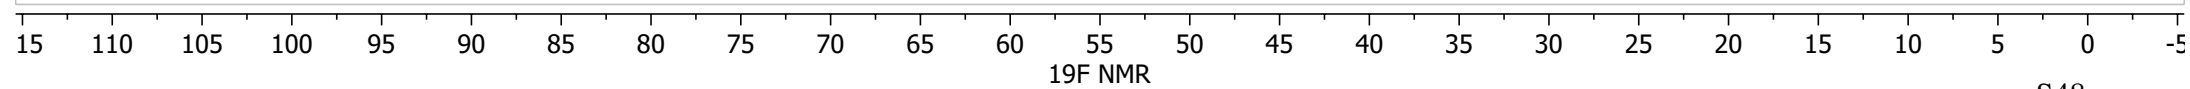



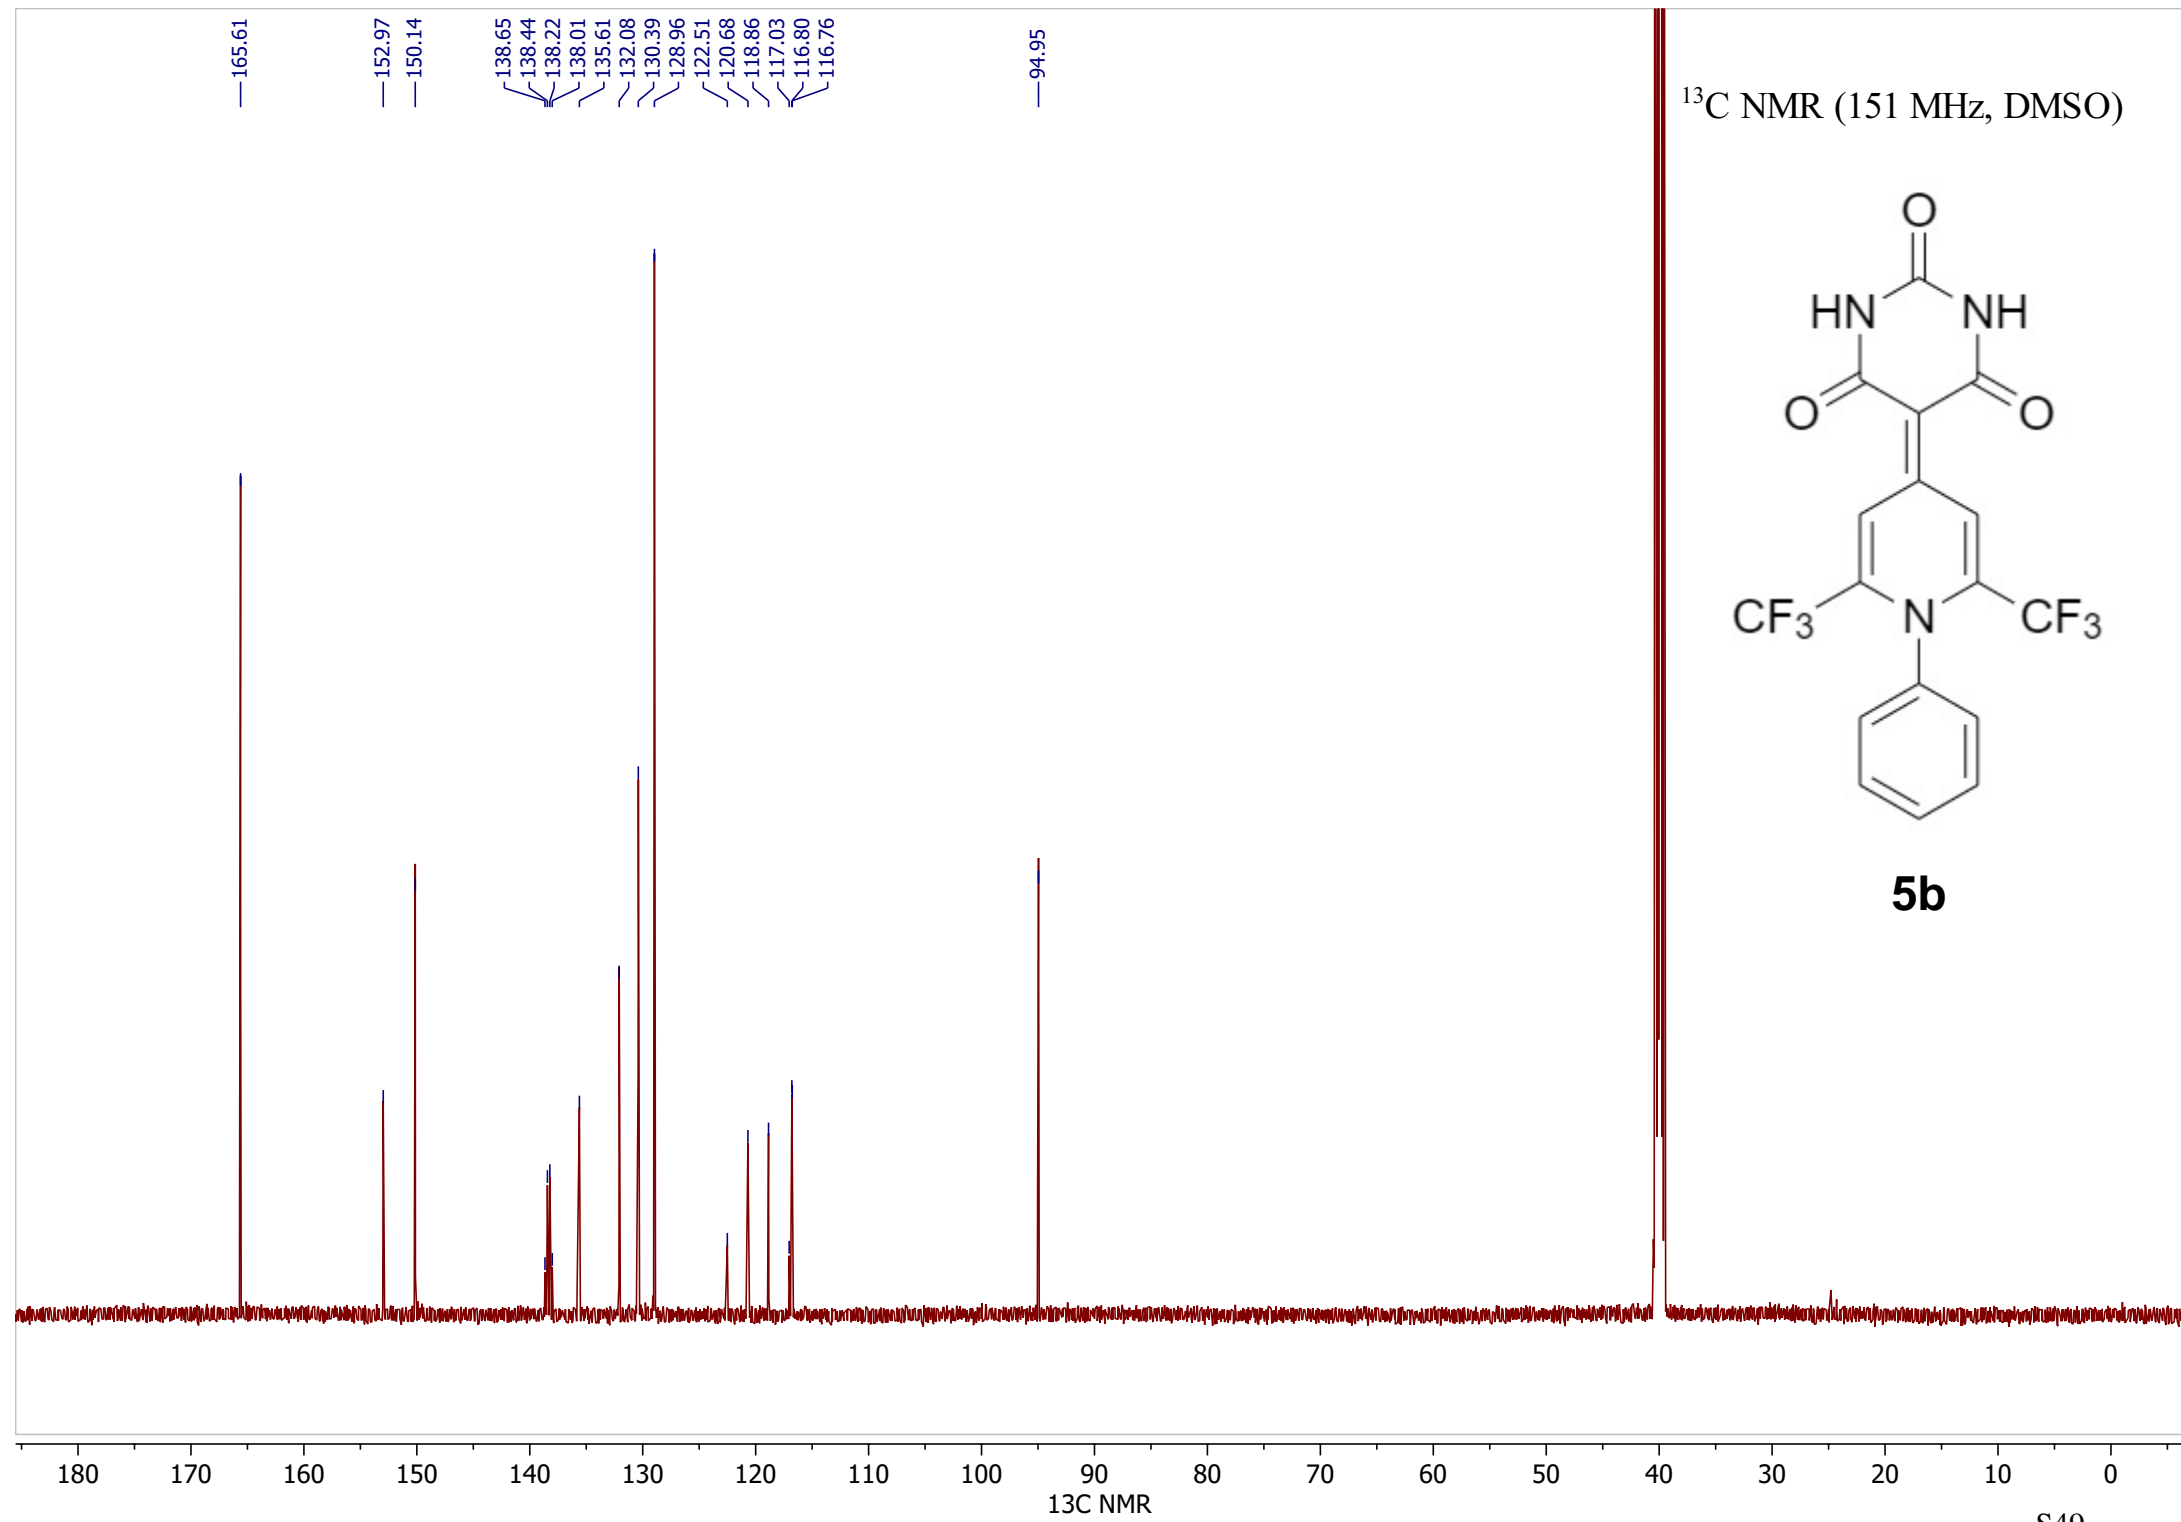

<sup>1</sup>H NMR (500 MHz, DMSO)

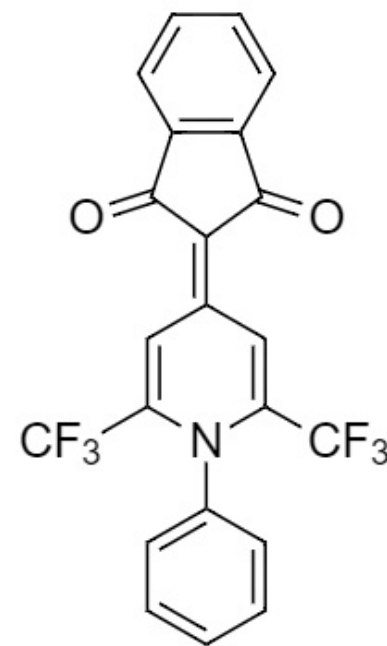

**5c**

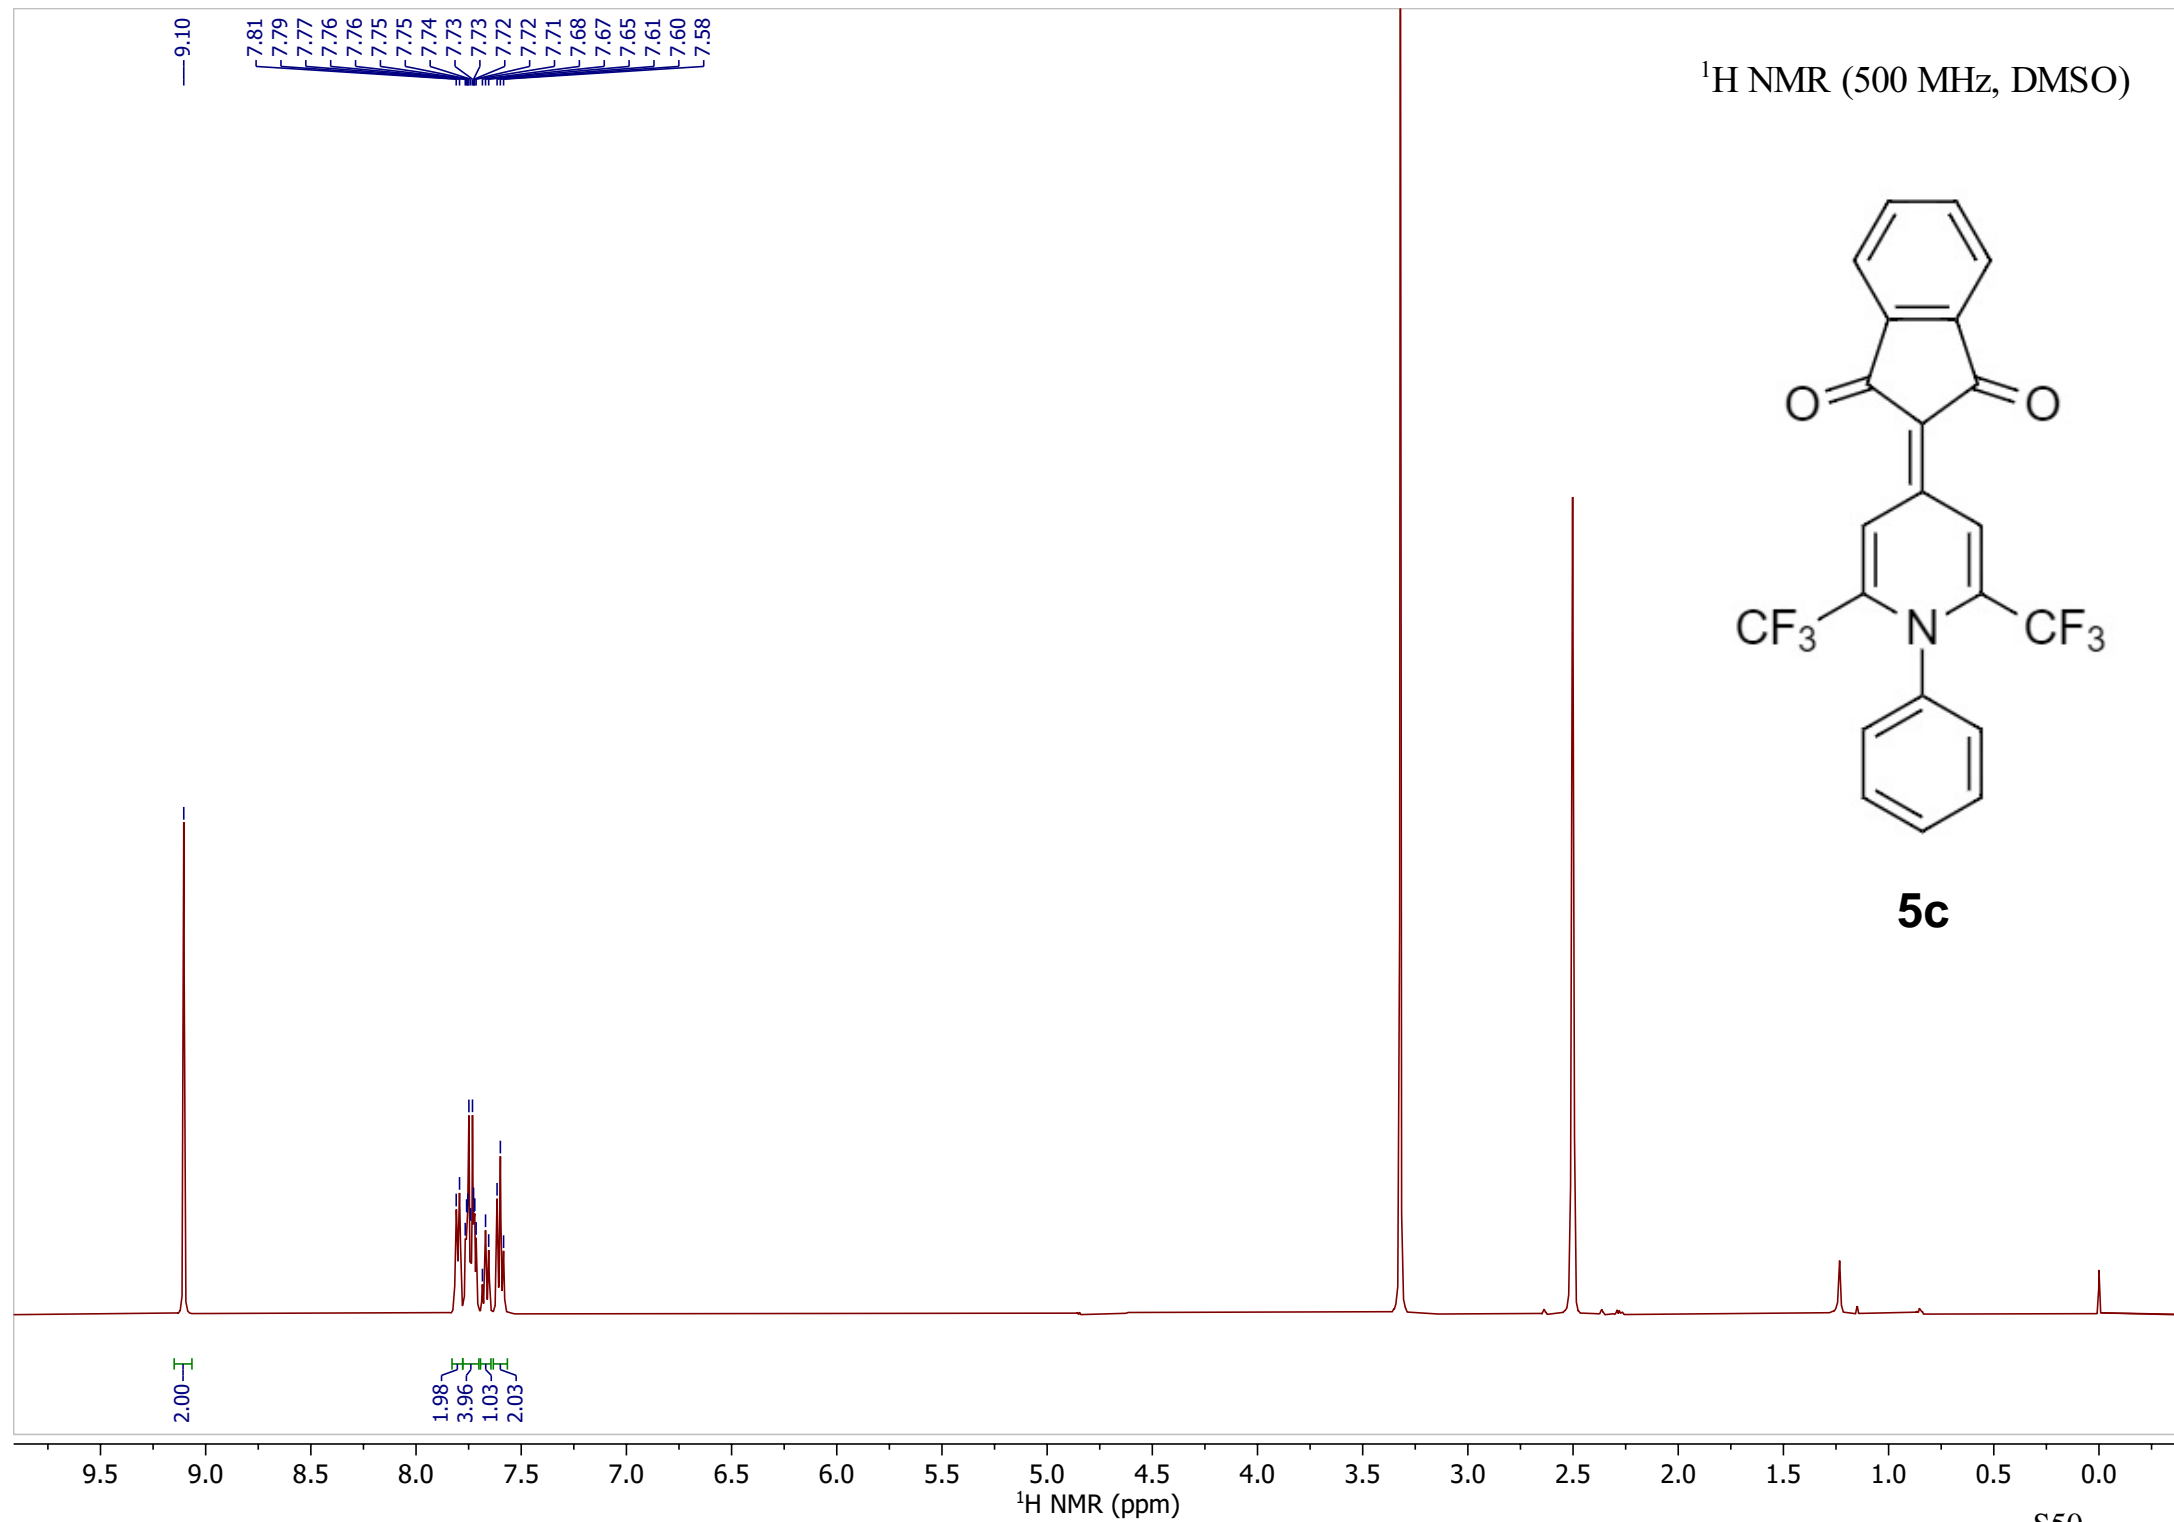

<sup>19</sup>F NMR (471 MHz, DMSO)

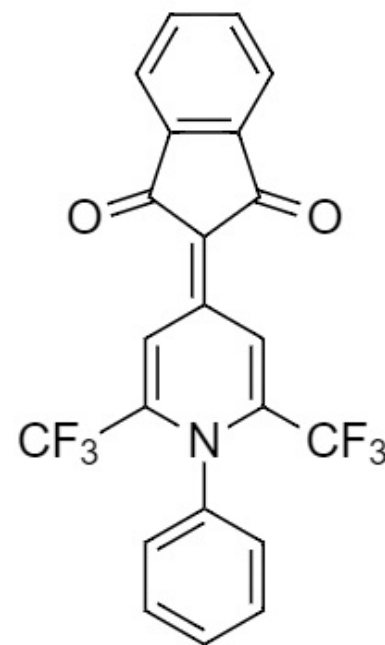

**5c**

— 102.82

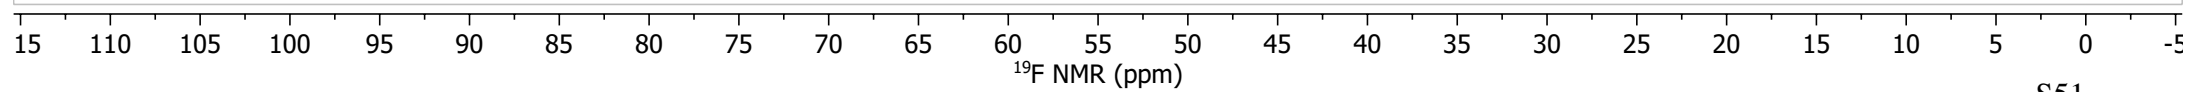

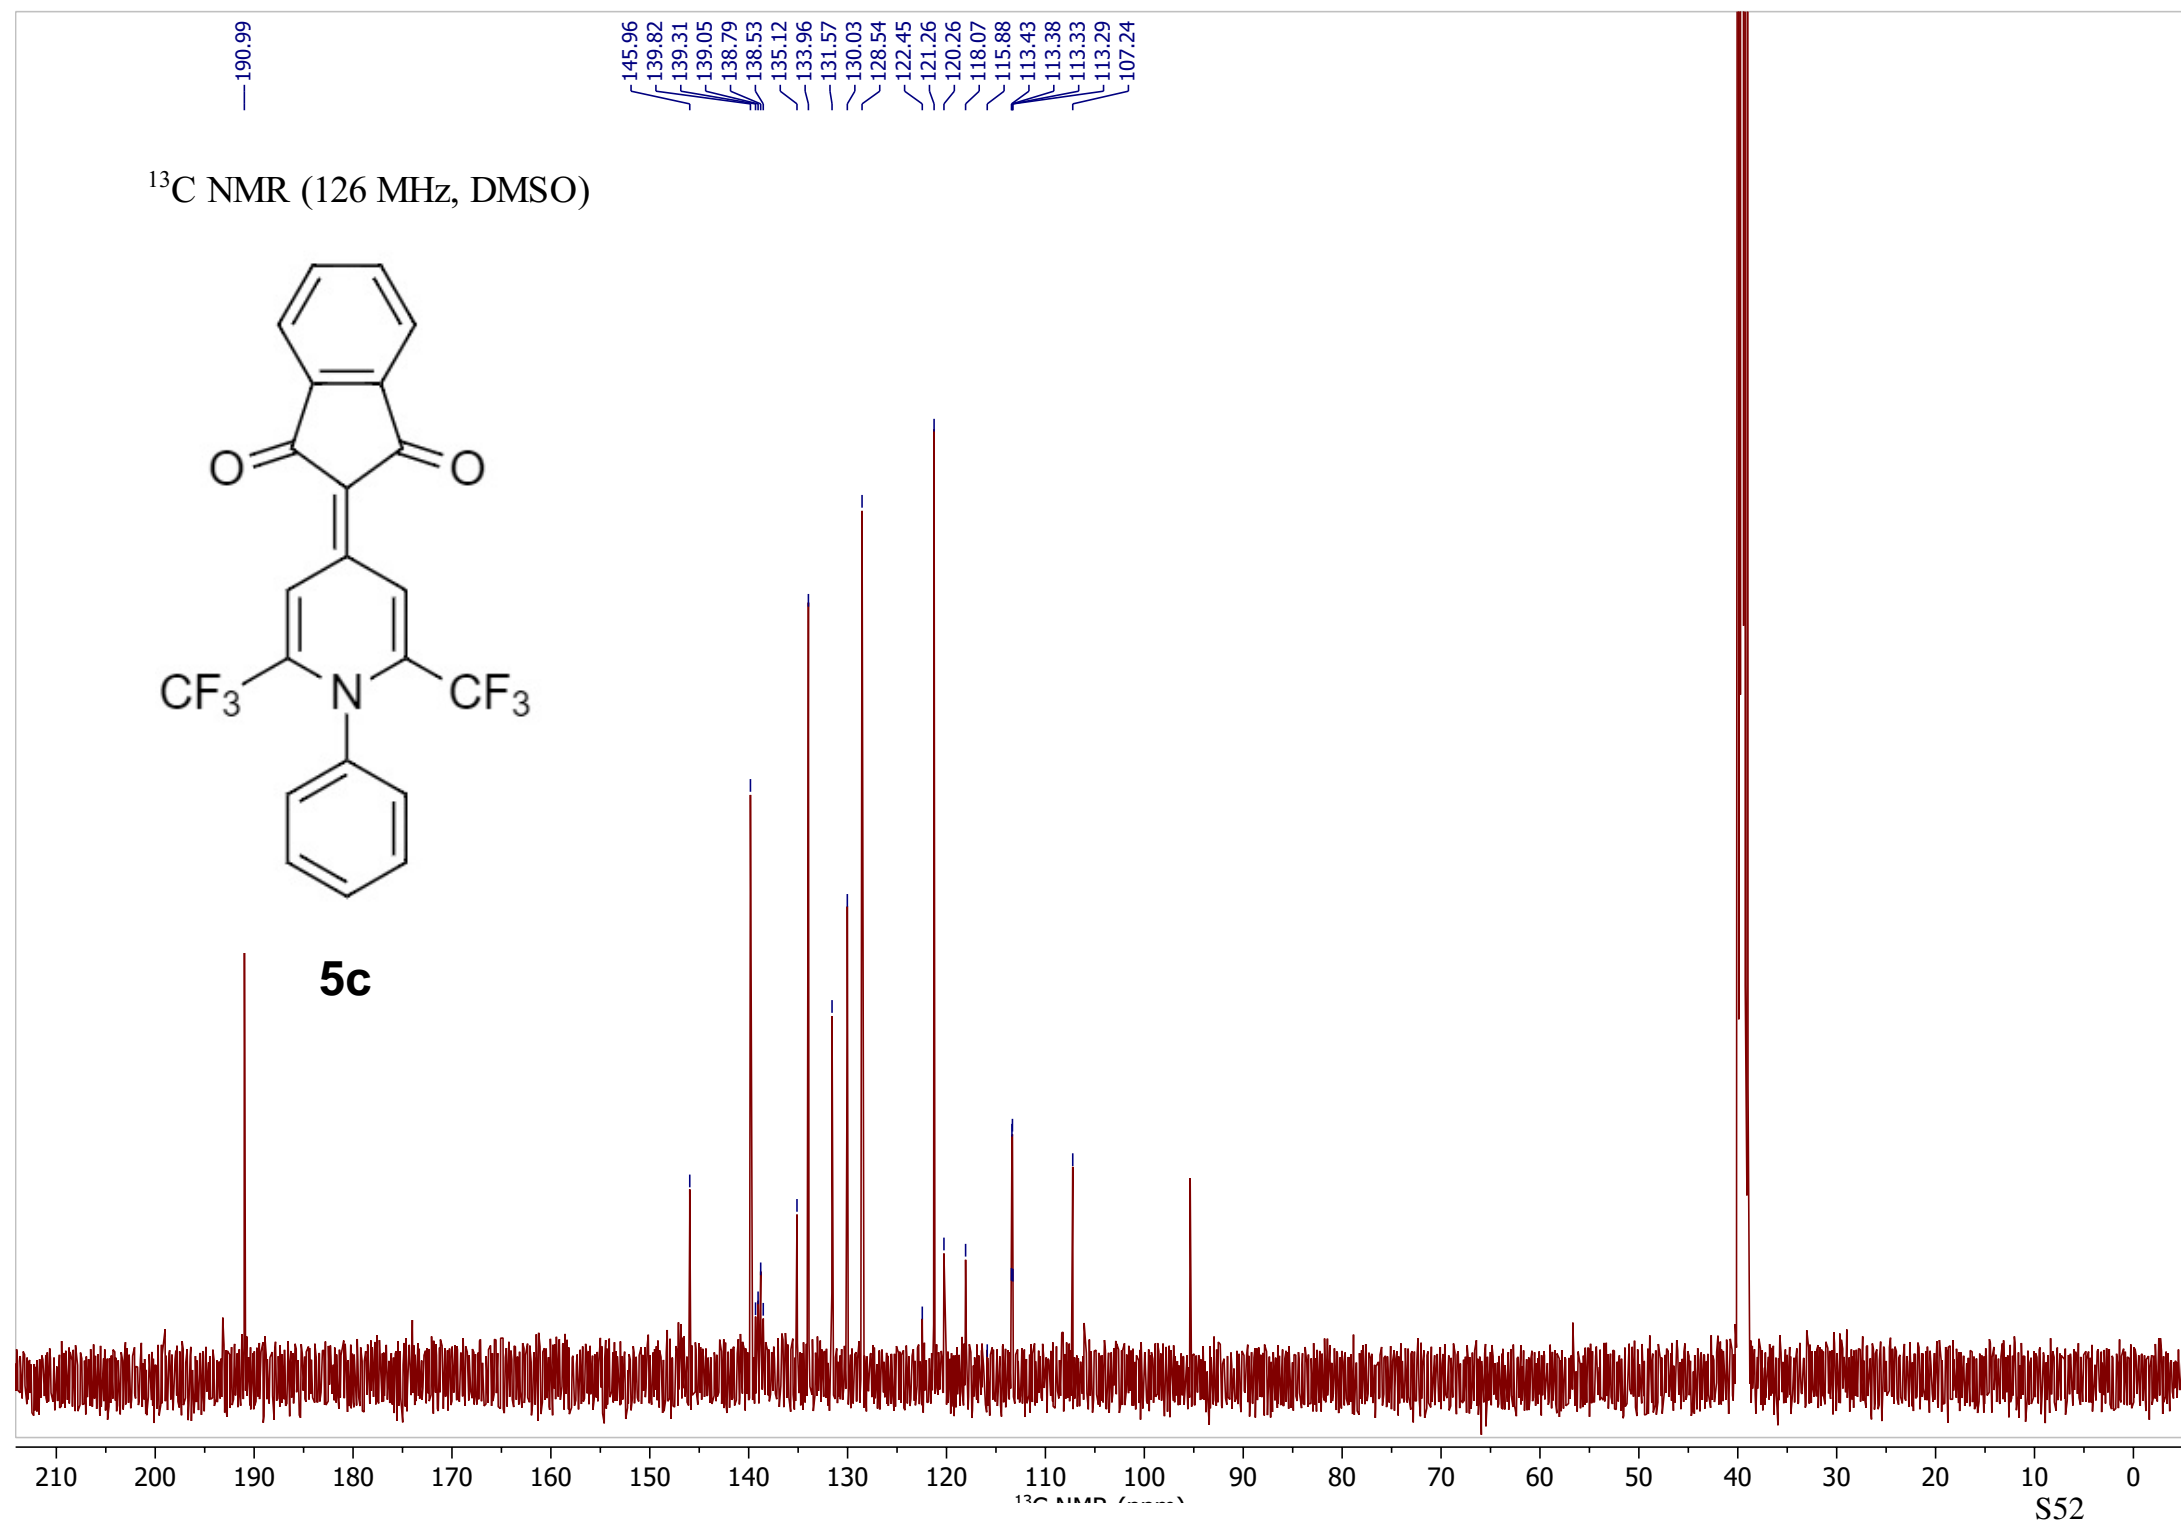

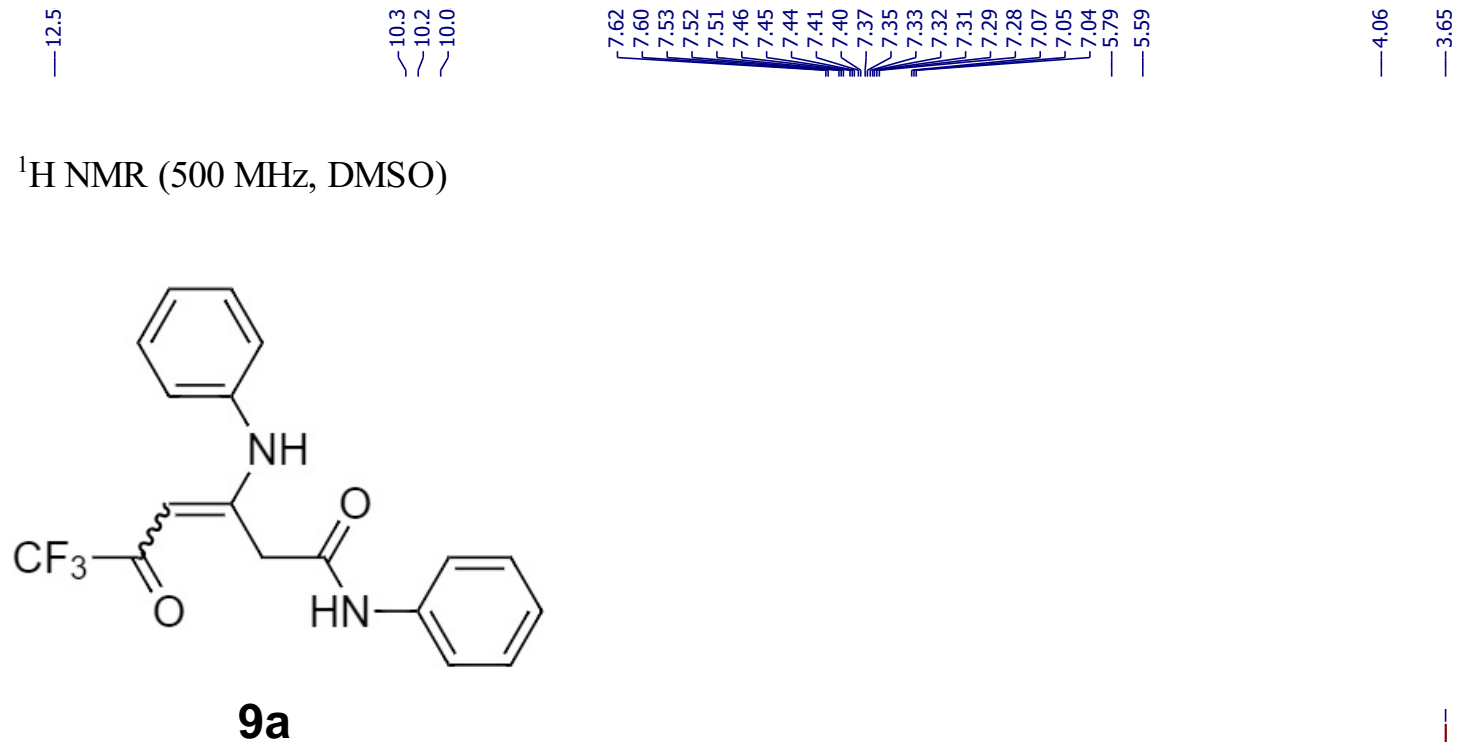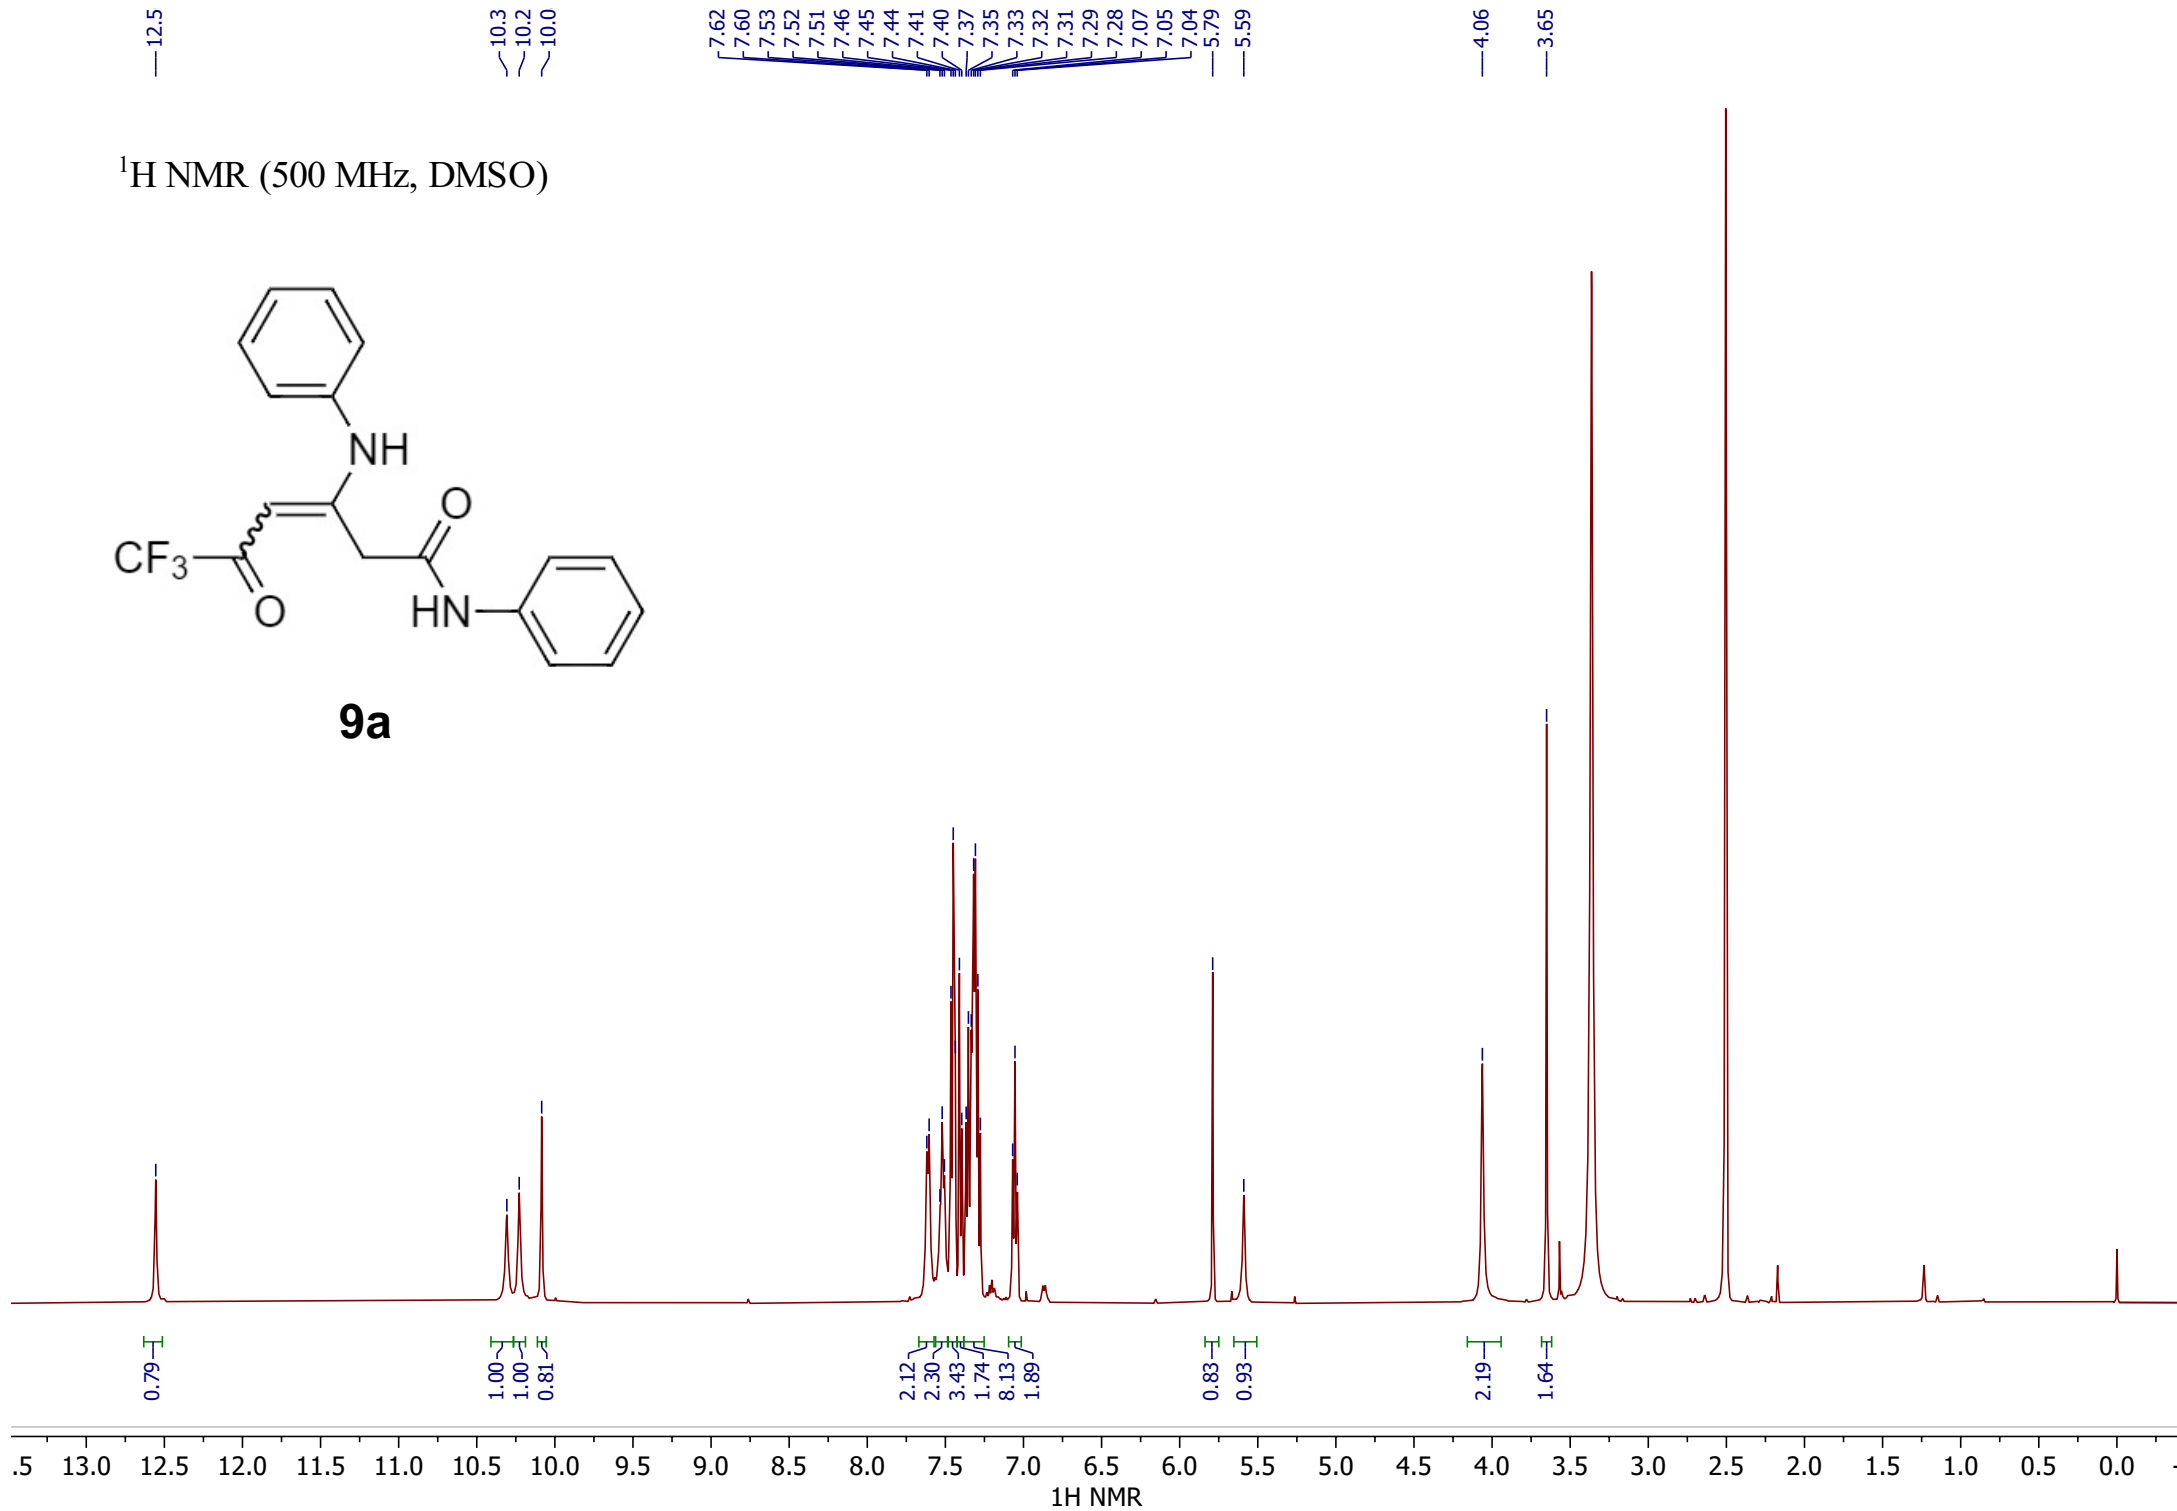

<sup>19</sup>F NMR (376 MHz, DMSO)

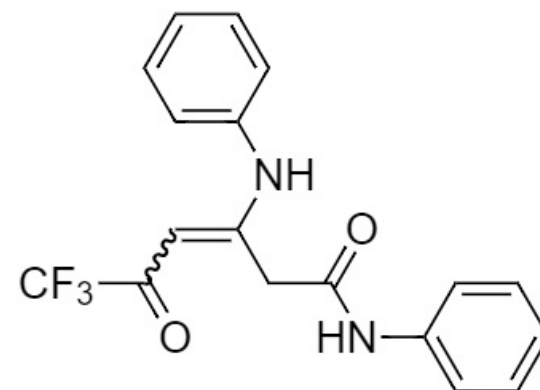

**9a**

87.14  
86.57

43.59  
56.41

<sup>19</sup>F NMR (ppm)

$^{13}\text{C}$  NMR (101 MHz,  $\text{CDCl}_3$ )

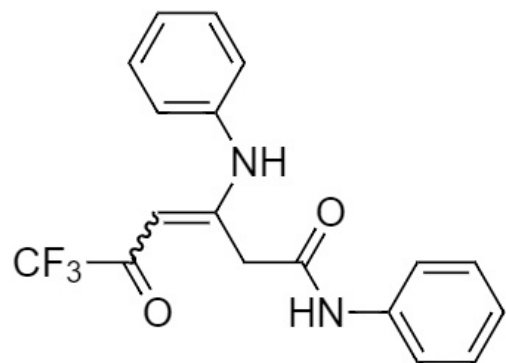

**9a**

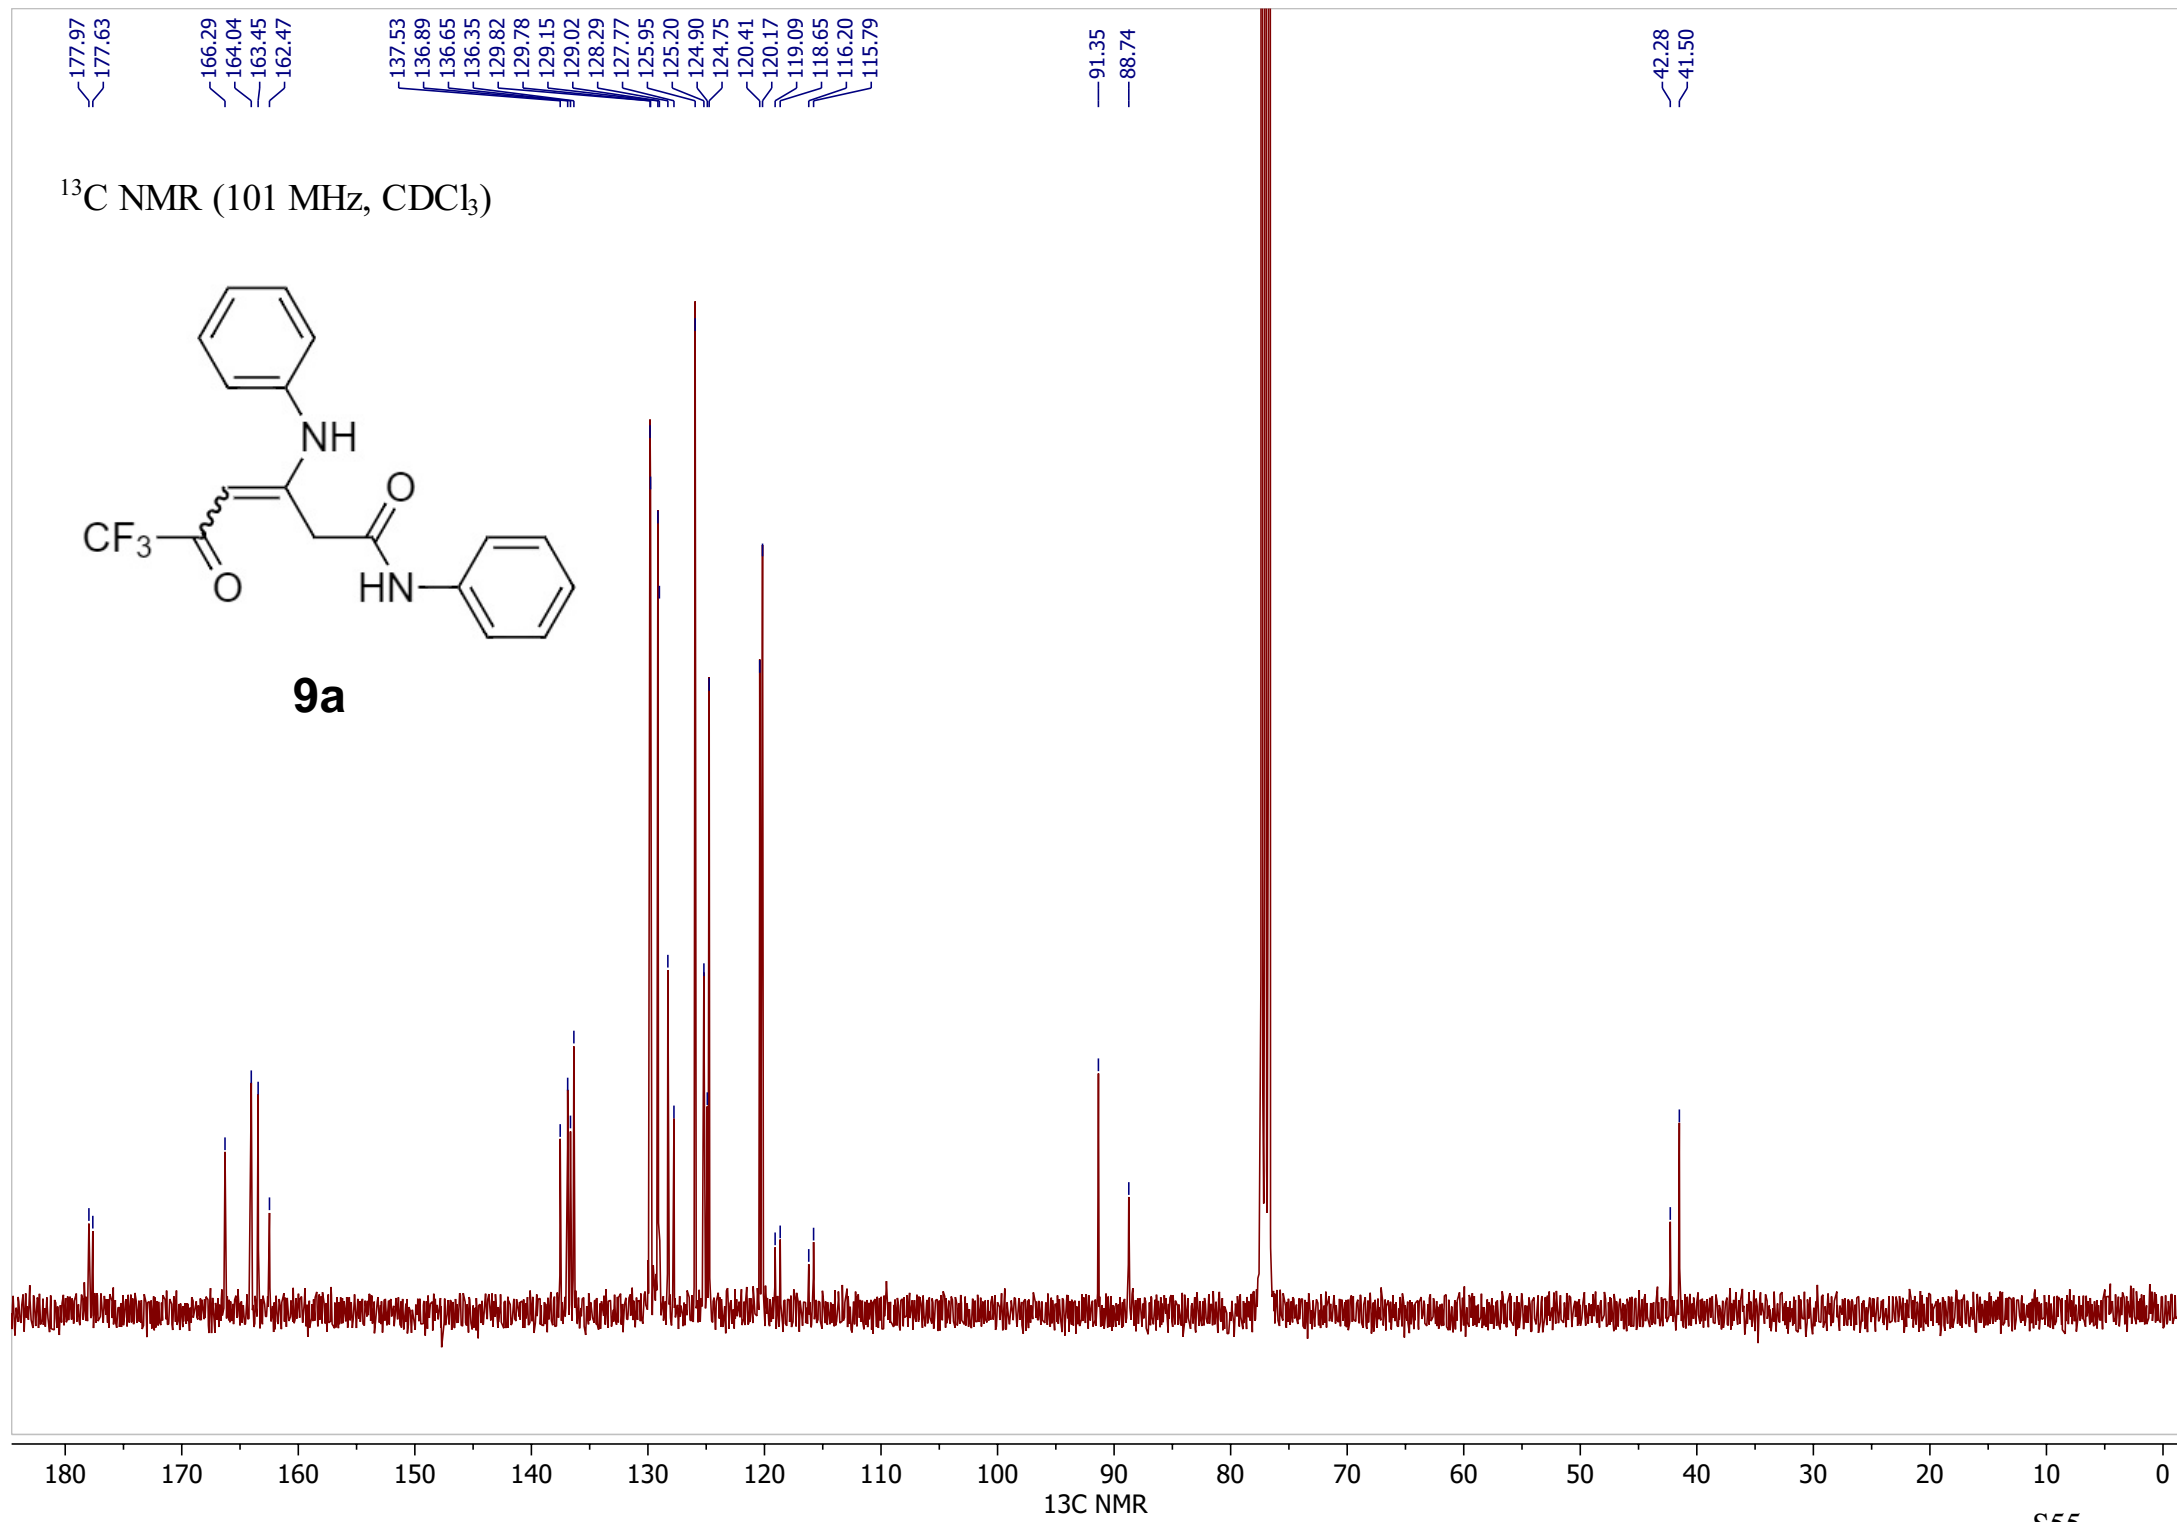

<sup>1</sup>H NMR (400 MHz, CDCl<sub>3</sub>)

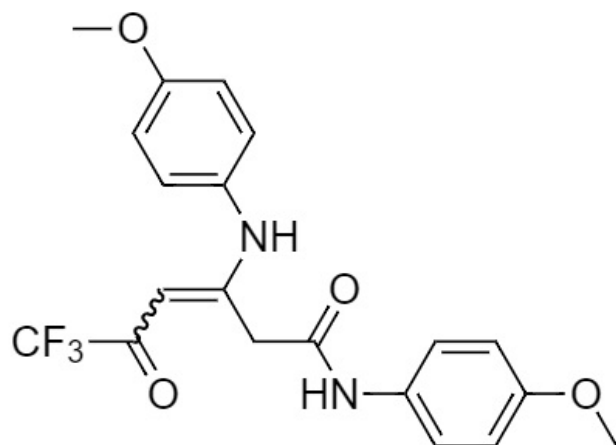

**9b**

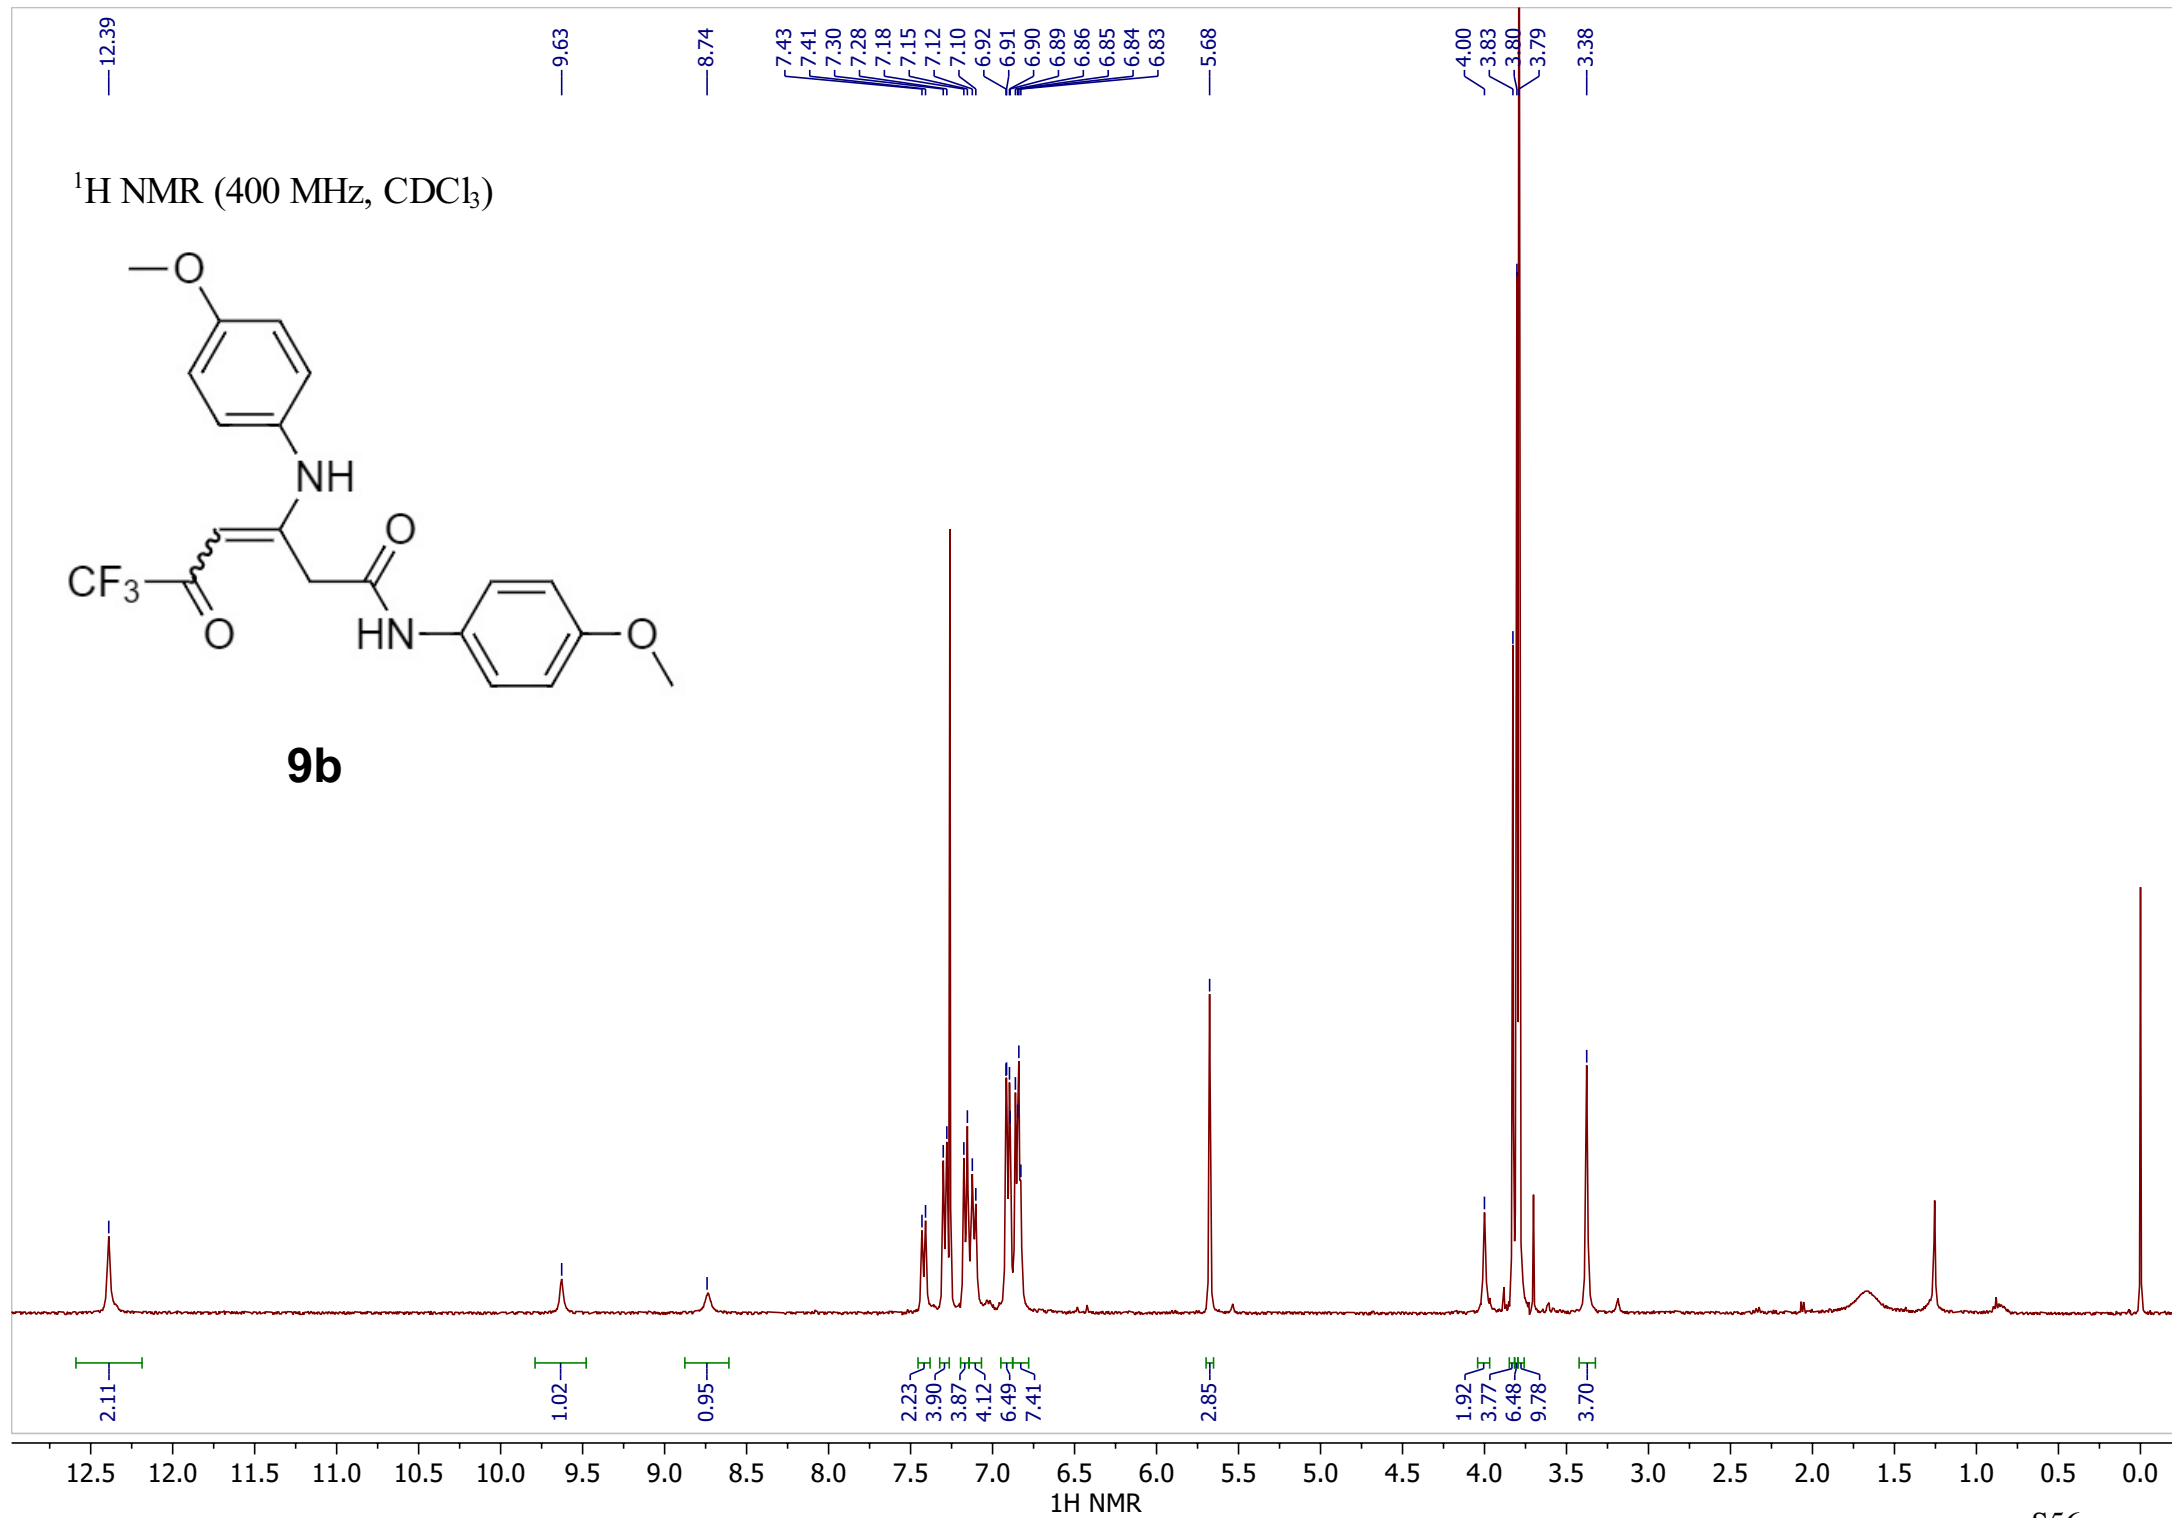



$^{19}\text{F}$  NMR (376 MHz,  $\text{CDCl}_3$ )

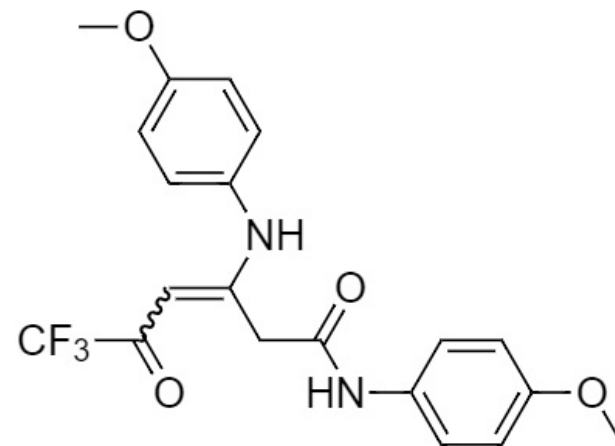

**9b**

85.08  
84.94

64.77  
35.23

100 95 90 85 80 75 70 65 60 55 50 45 40 35 30 25 20 15 10 5 0 -5  
 $^{19}\text{F}$  NMR

$^{13}\text{C}$  NMR (126 MHz,  $\text{CDCl}_3$ )

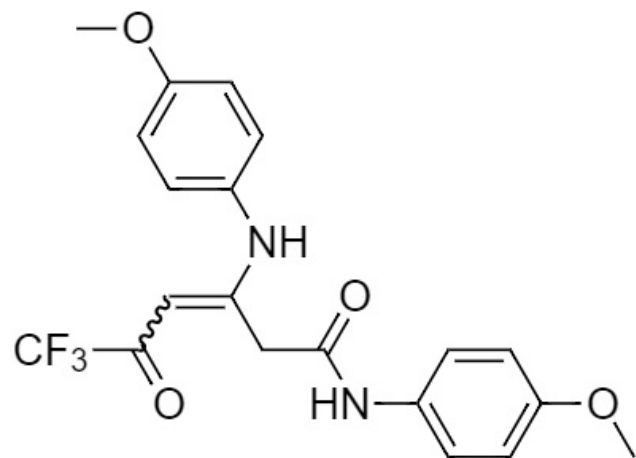

**9b**

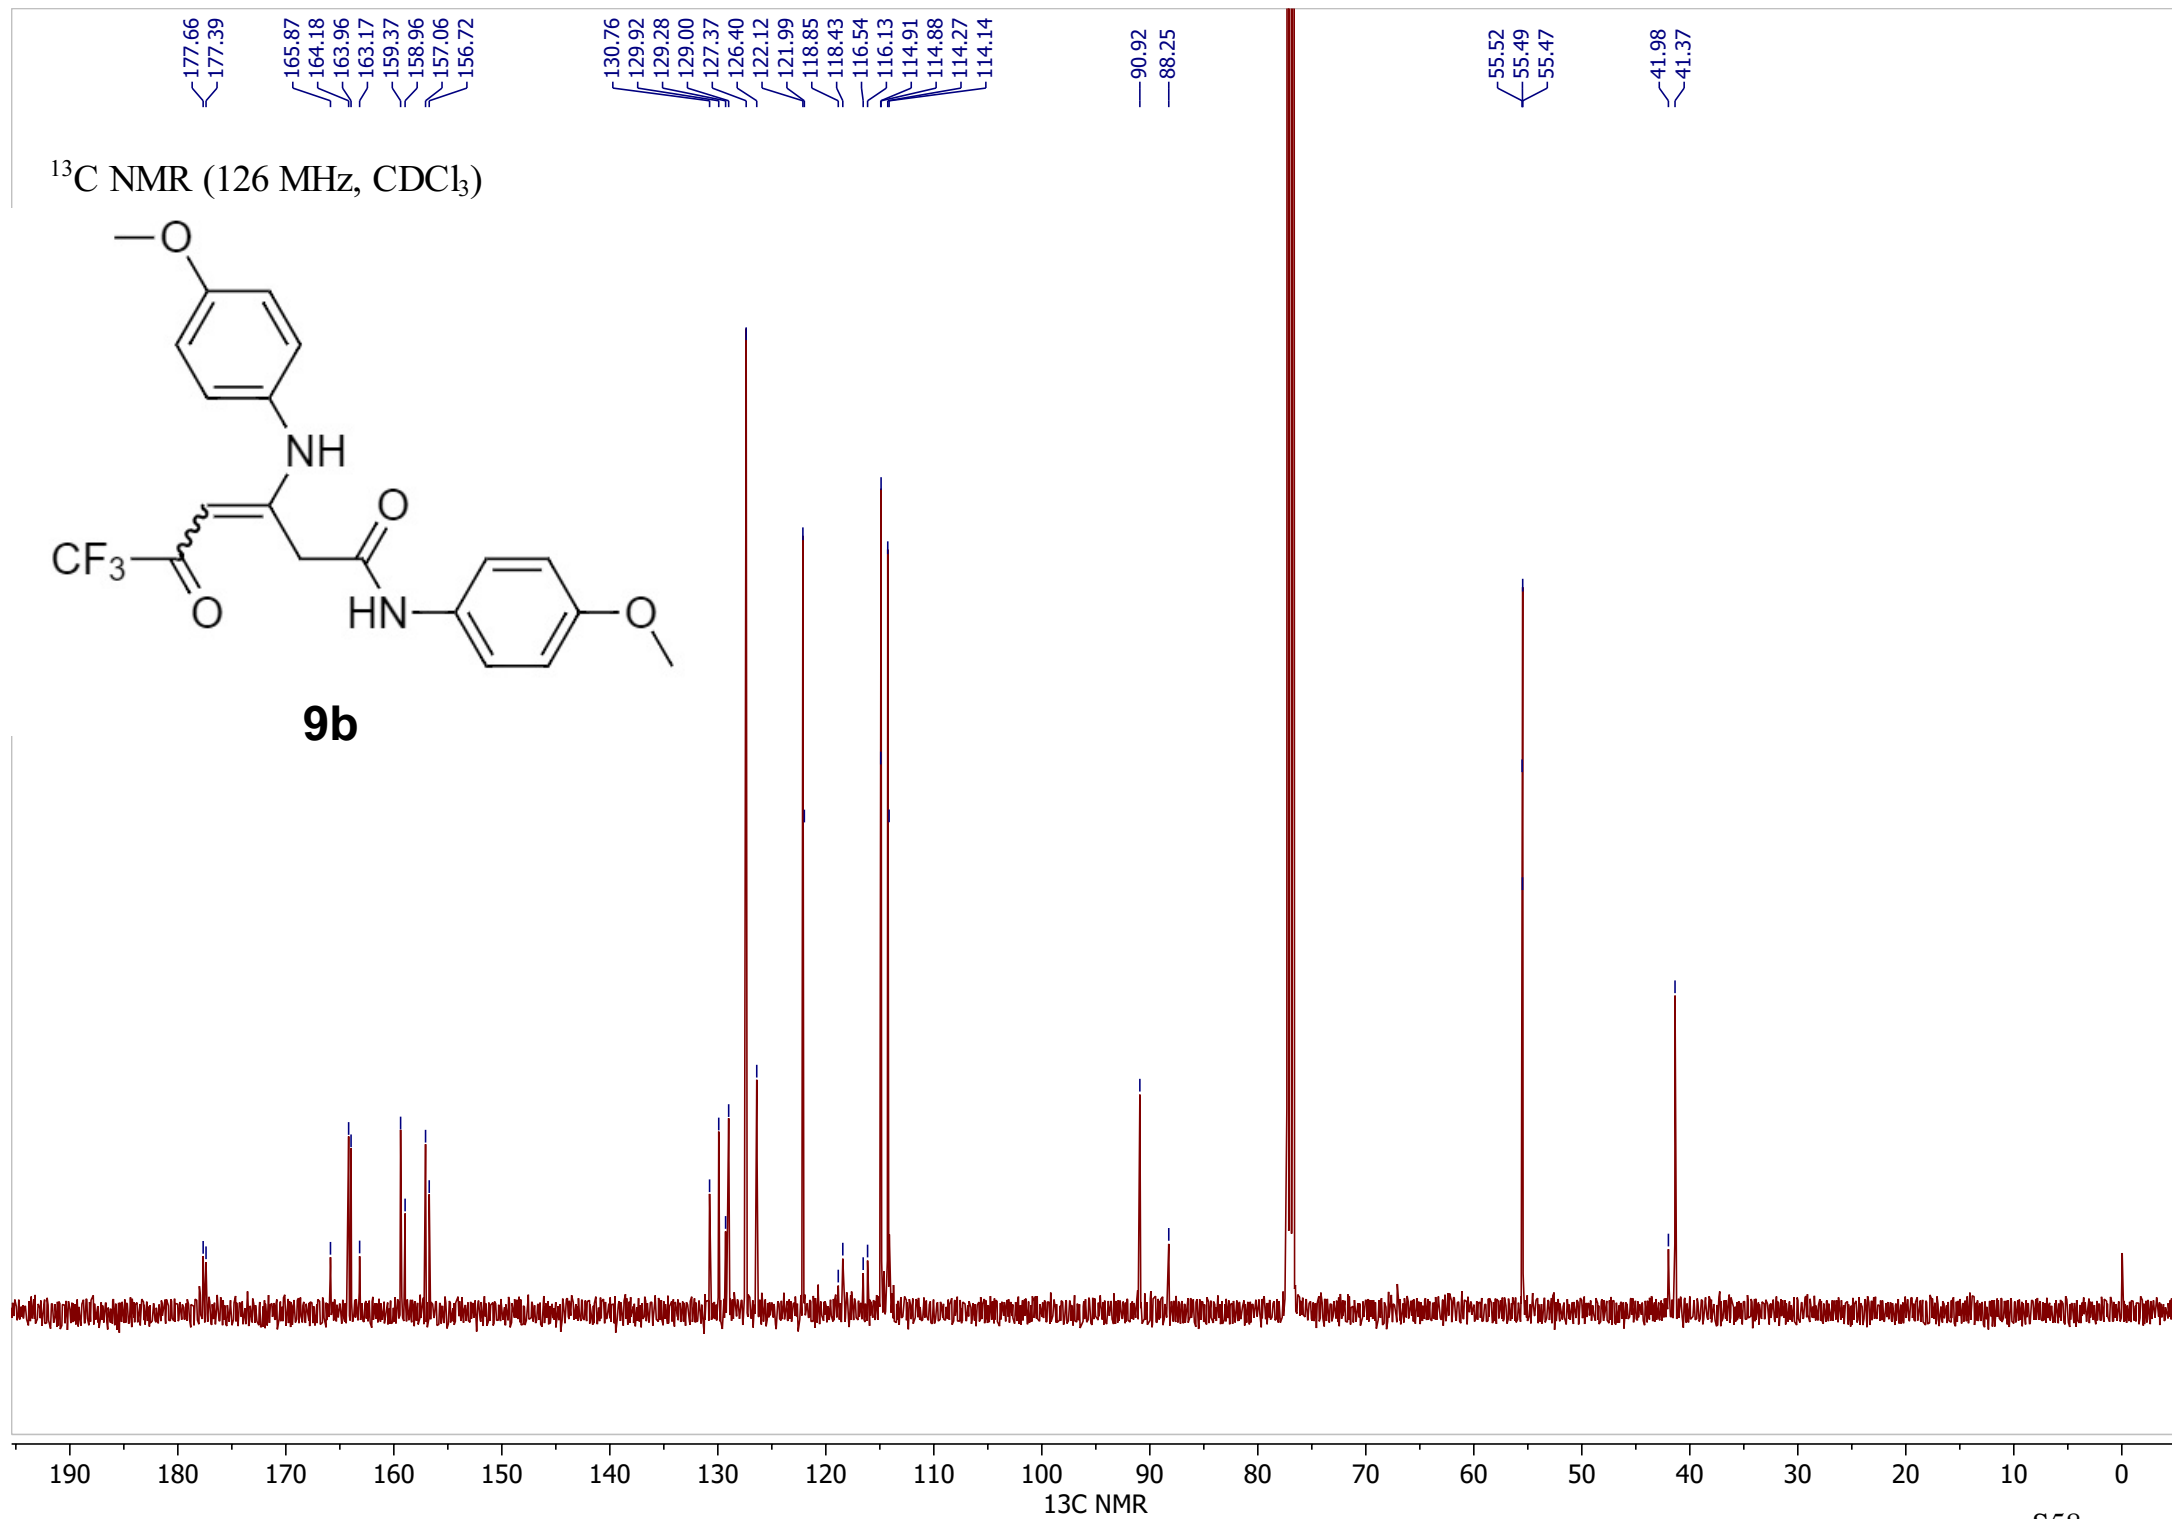

<sup>1</sup>H NMR (400 MHz, CDCl<sub>3</sub>)

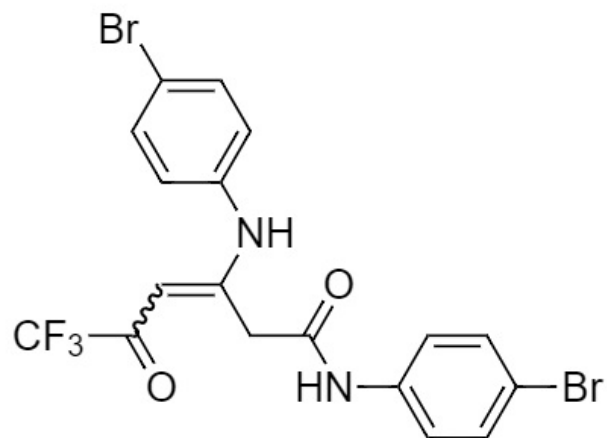

**9c**

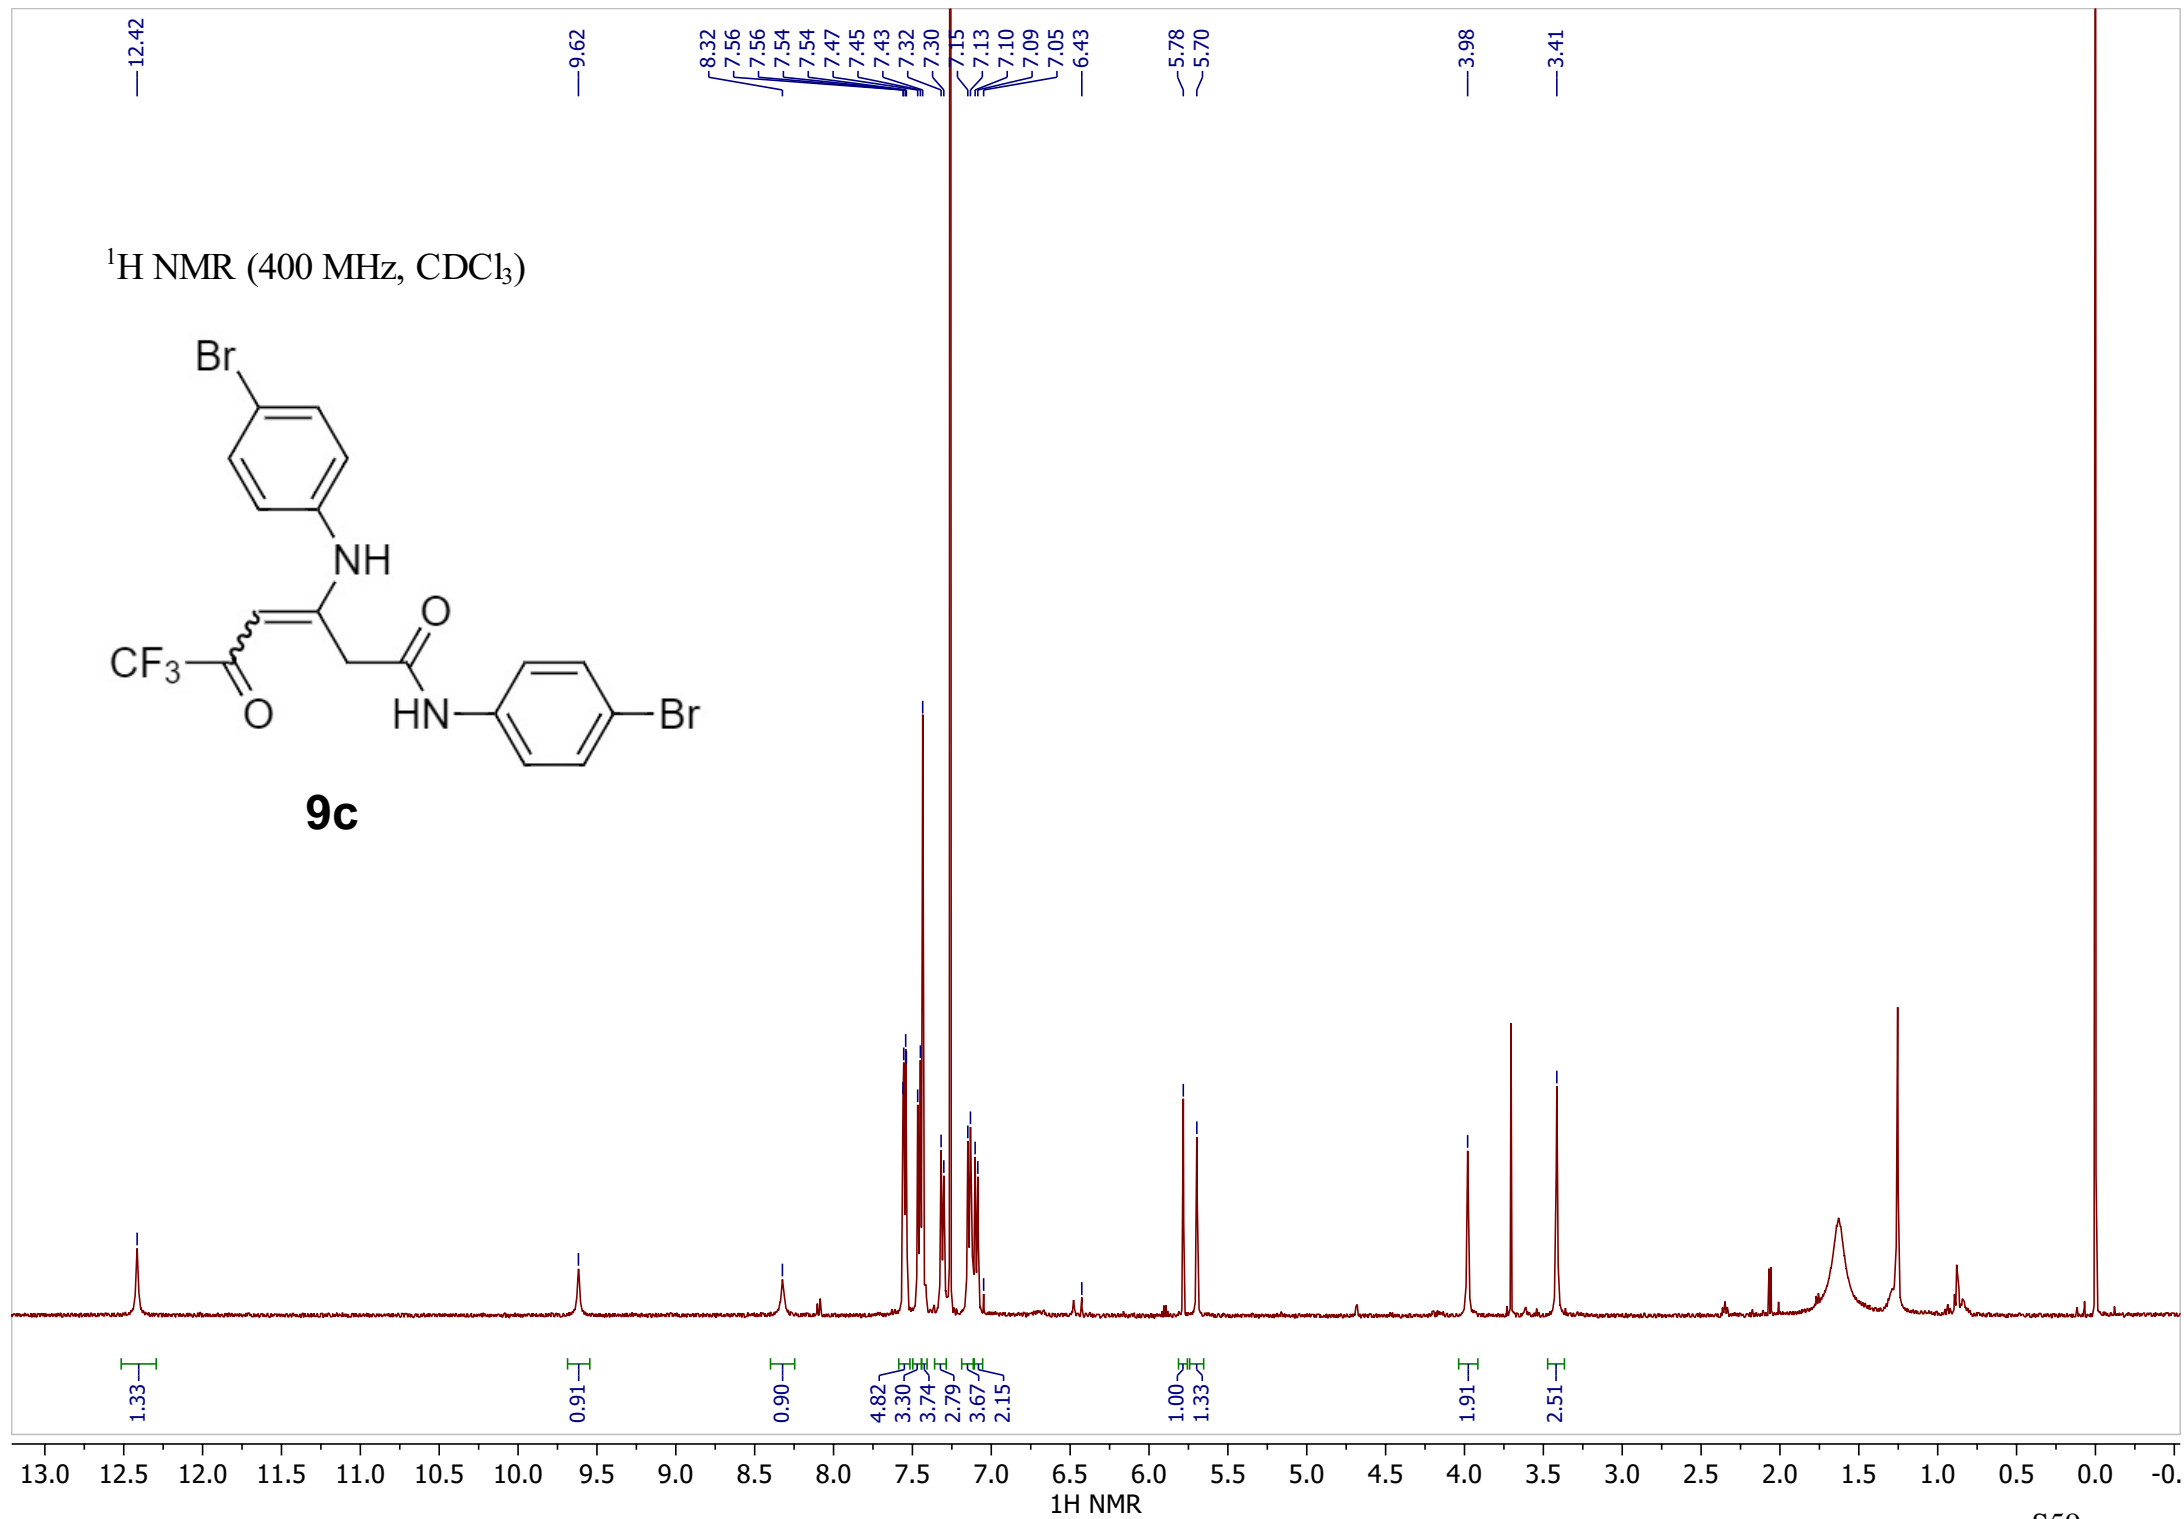

$^{19}\text{F}$  NMR (471 MHz,  $\text{CDCl}_3$ )

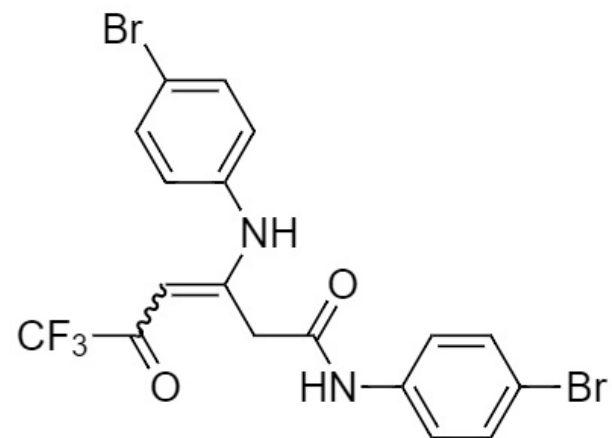

**9c**

84.95  
84.76

1.41  
1.00

$^{19}\text{F}$  NMR

S60

<sup>1</sup>H NMR (500 MHz, DMSO)

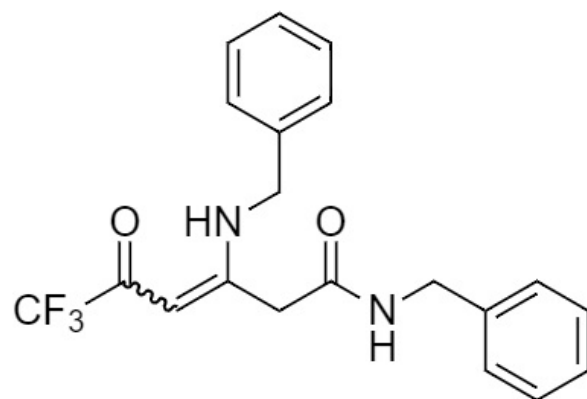

**9d**

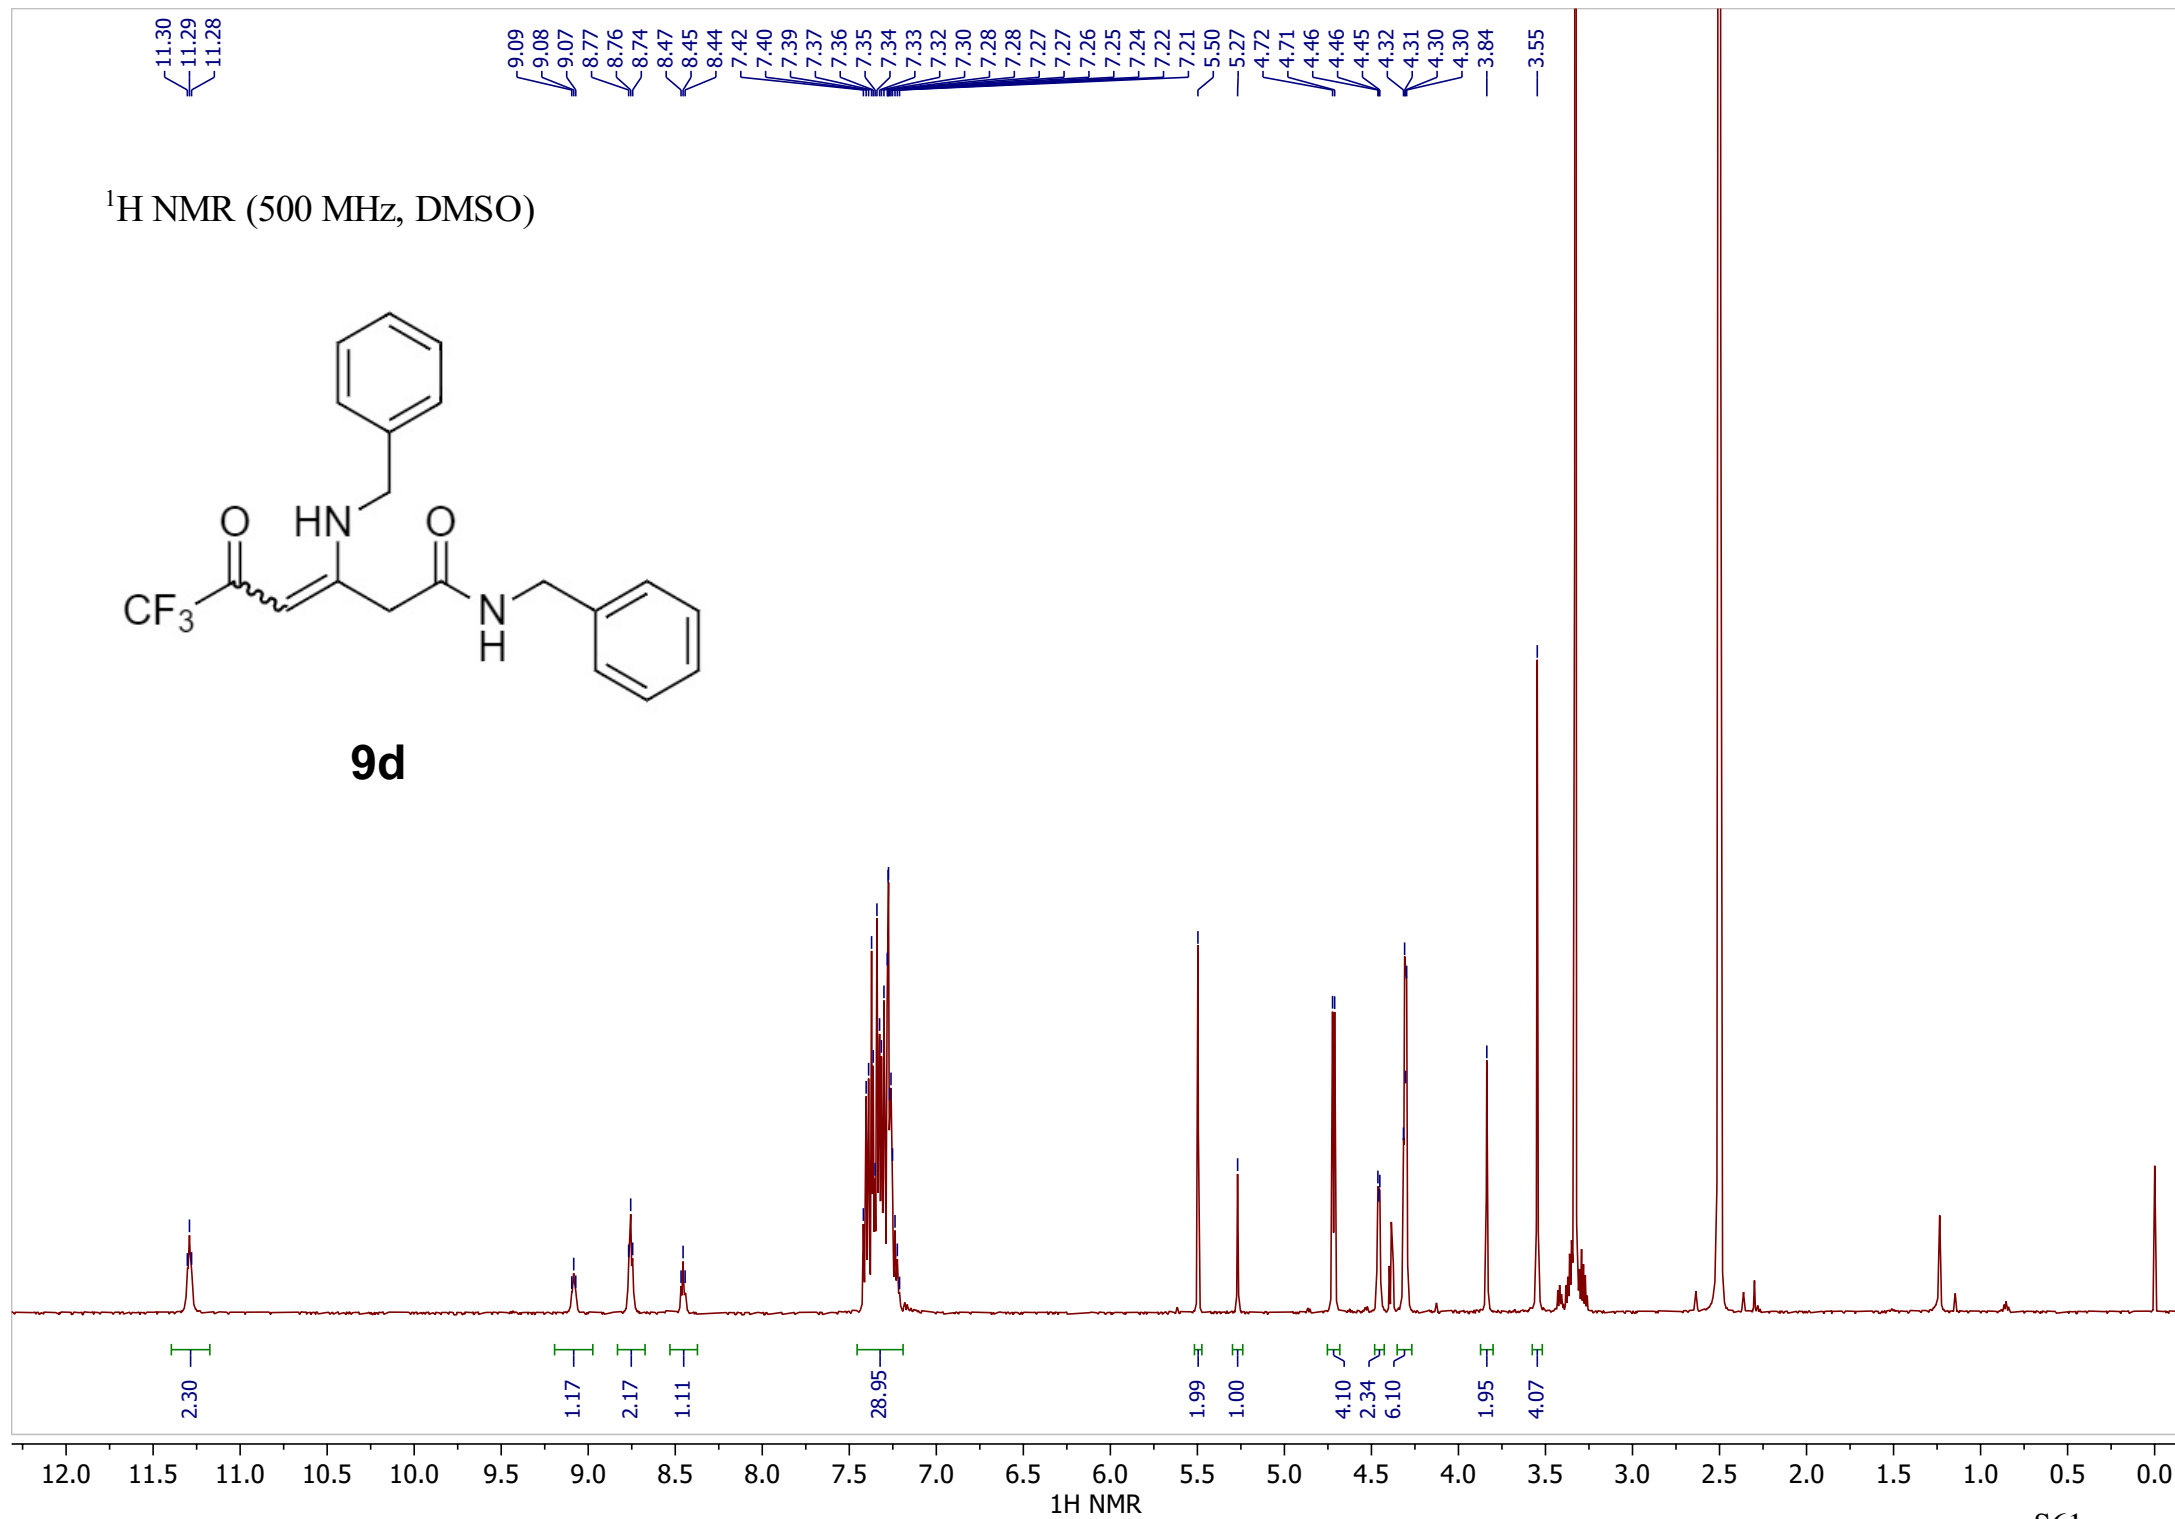

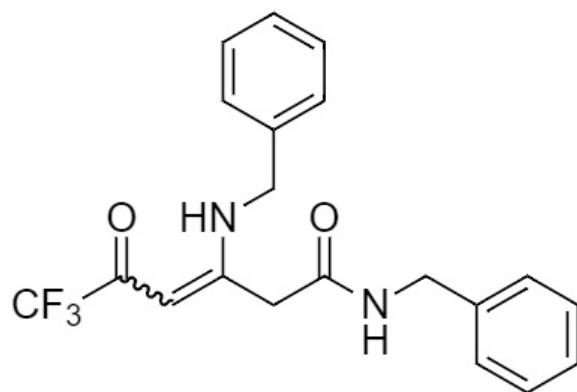

**9d**

$^1\text{H}$  NMR (500 MHz,  $\text{CDCl}_3$ )

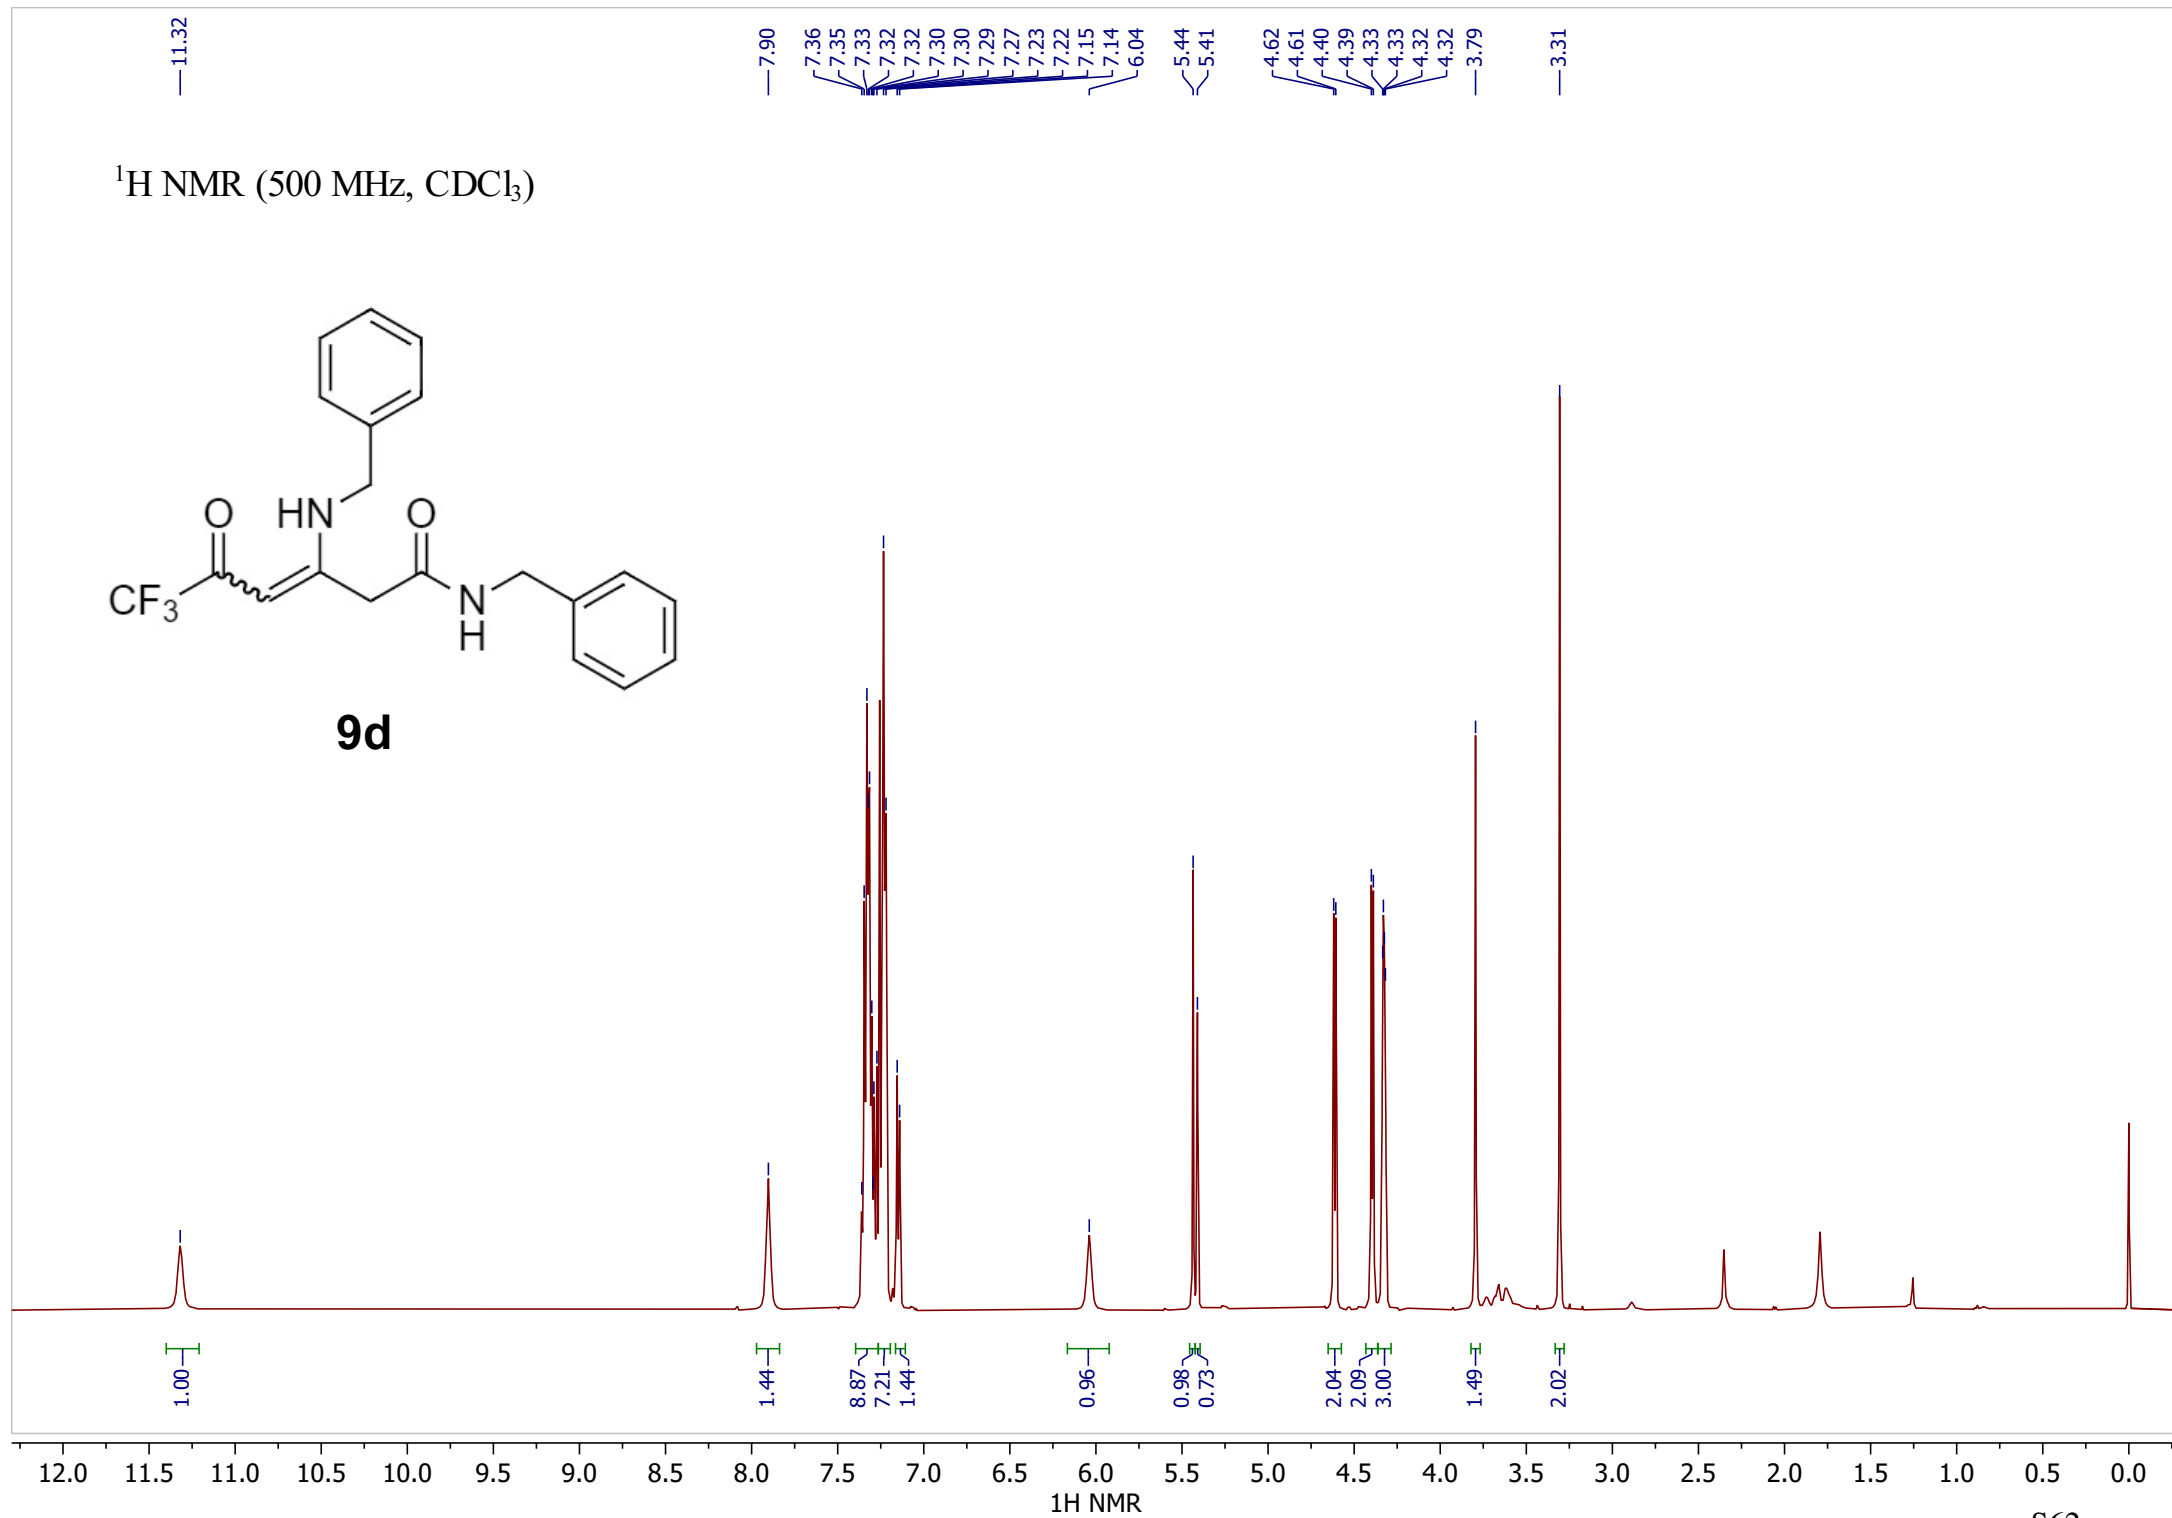

$^{19}\text{F}$  NMR (471 MHz,  $\text{CDCl}_3$ )

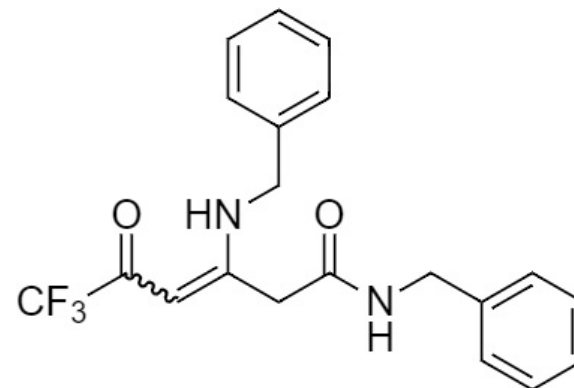

**9d**

85.06  
84.85

57.60  
42.40

$^{19}\text{F}$  NMR

S63

$^{13}\text{C}$  NMR (126 MHz,  $\text{CDCl}_3$ )

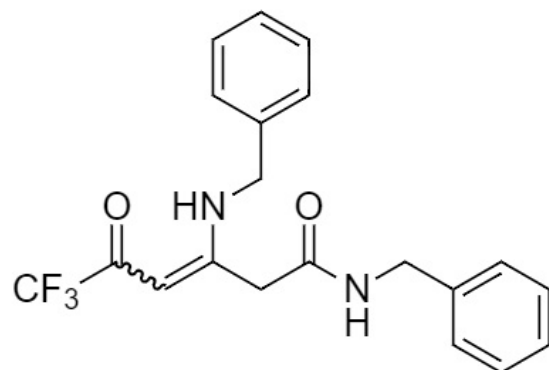

**9d**

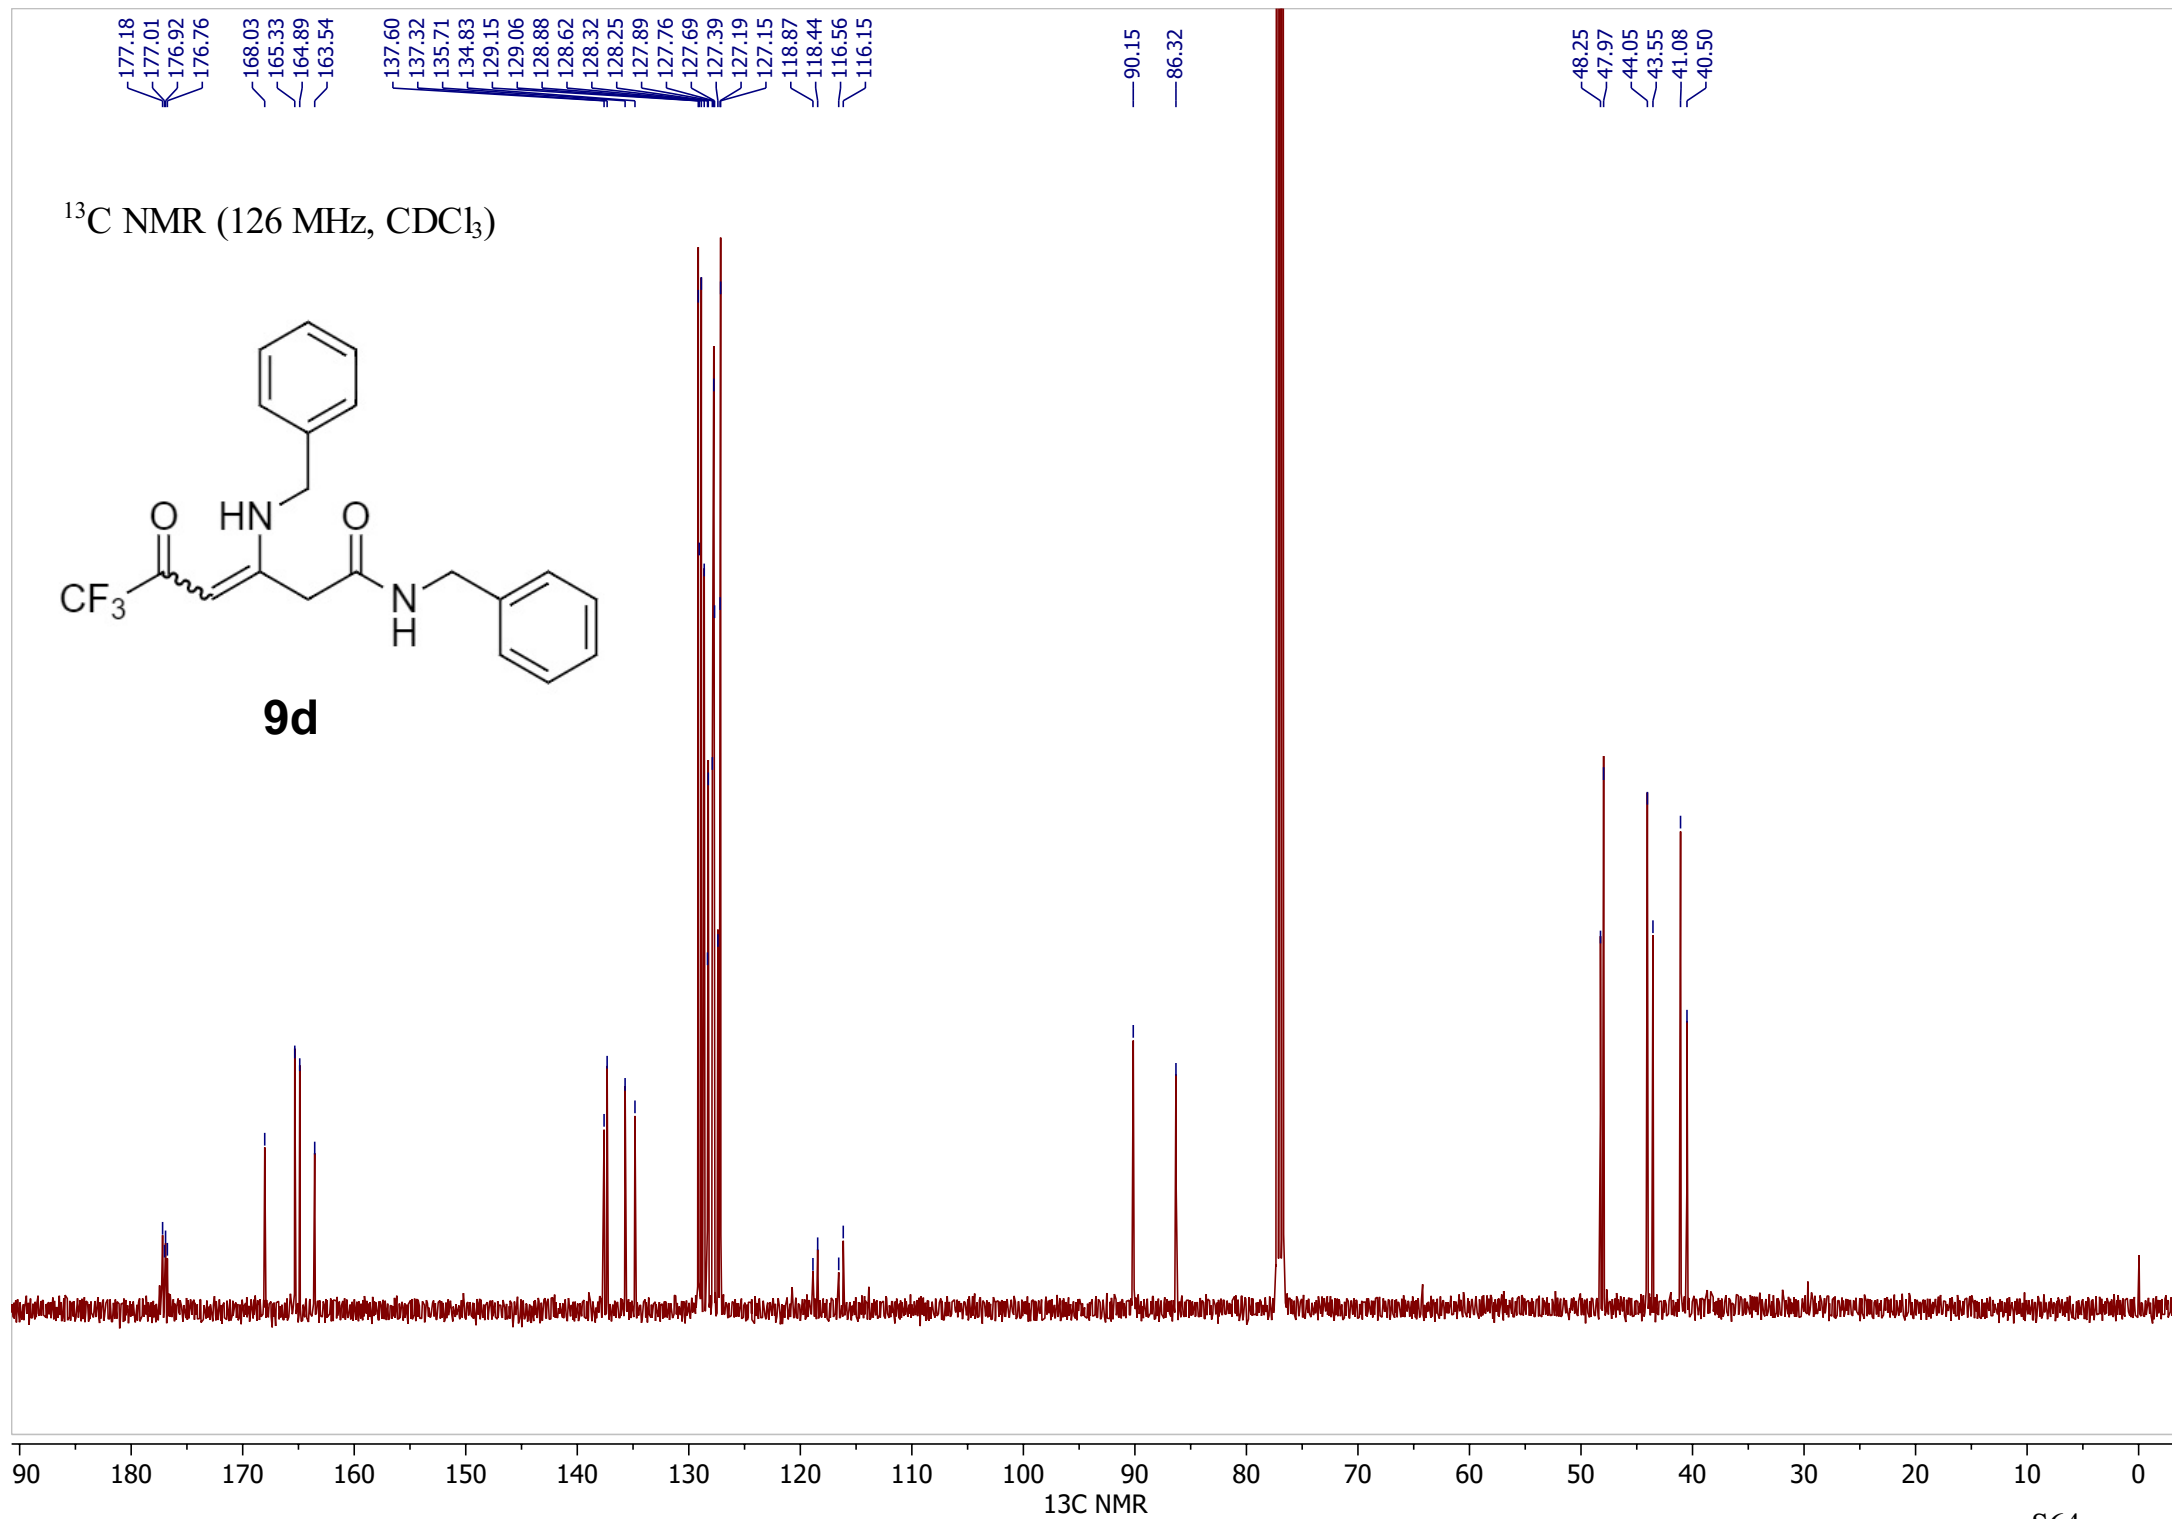



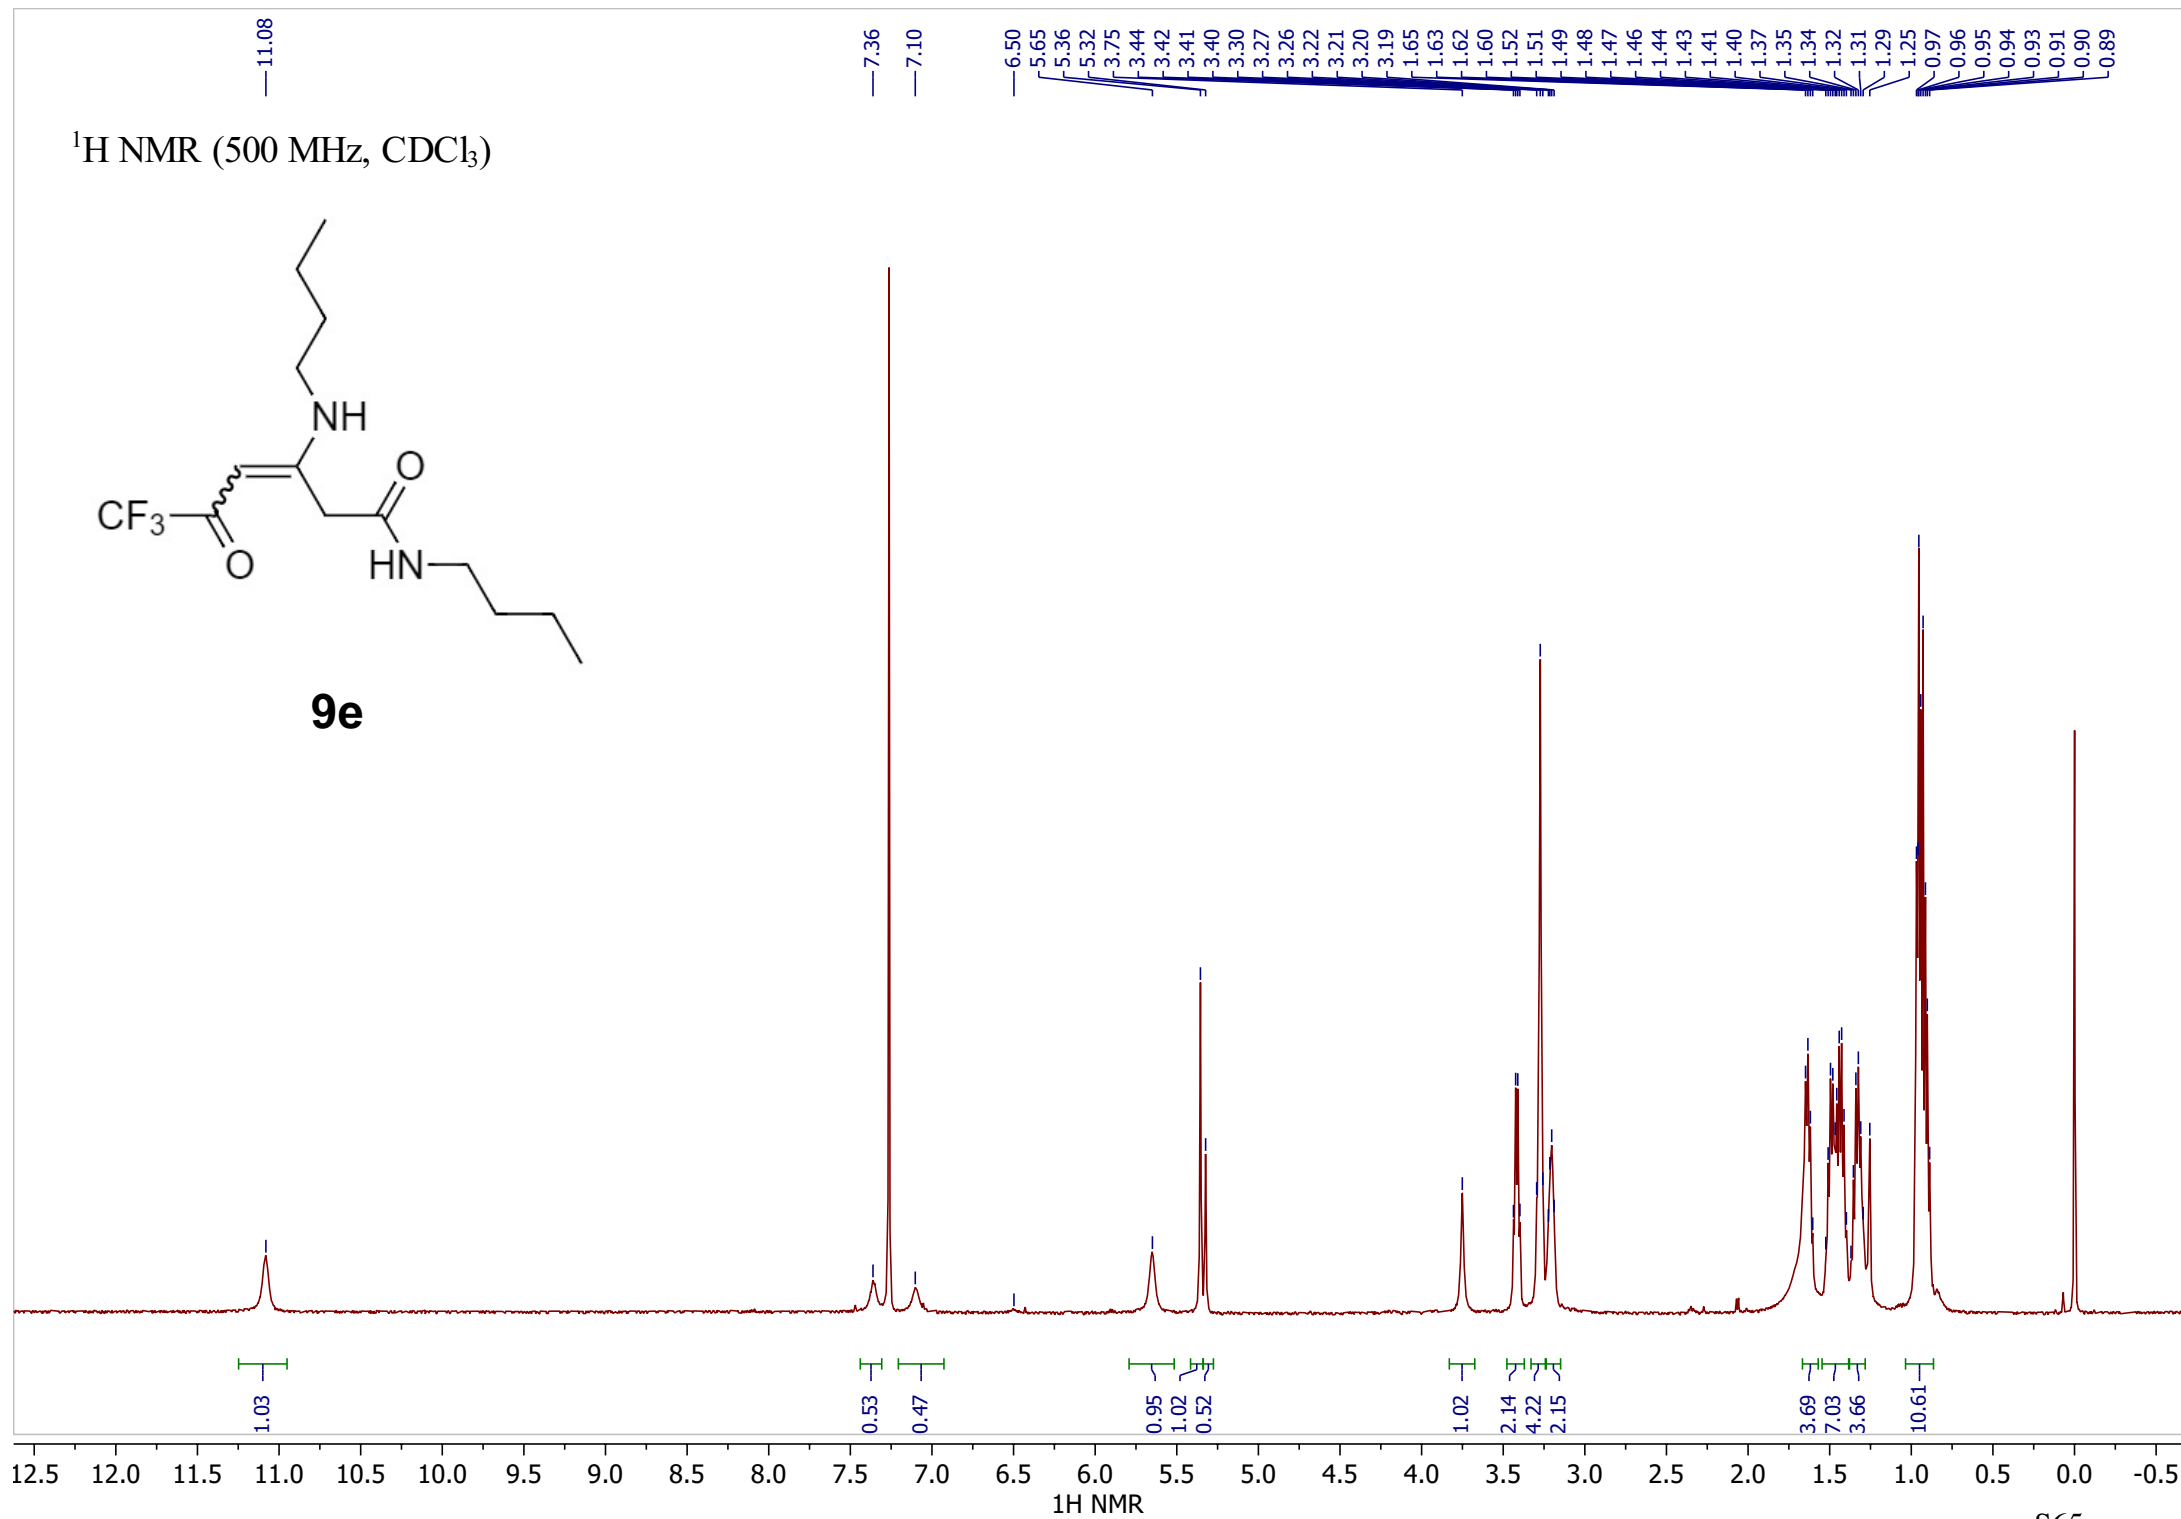

$^{19}\text{F}$  NMR (471 MHz,  $\text{CDCl}_3$ )

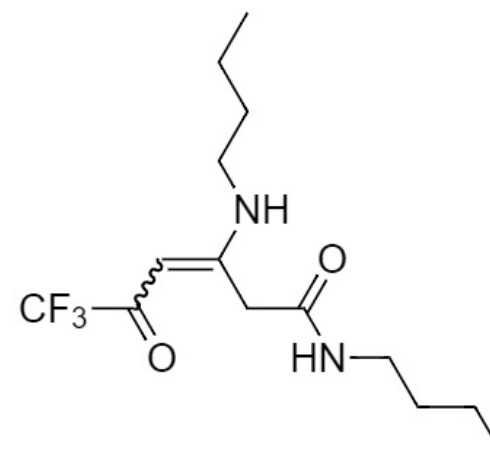

**9e**

85.04  
84.90

62.88  
33.37

$^{19}\text{F}$  NMR

S66

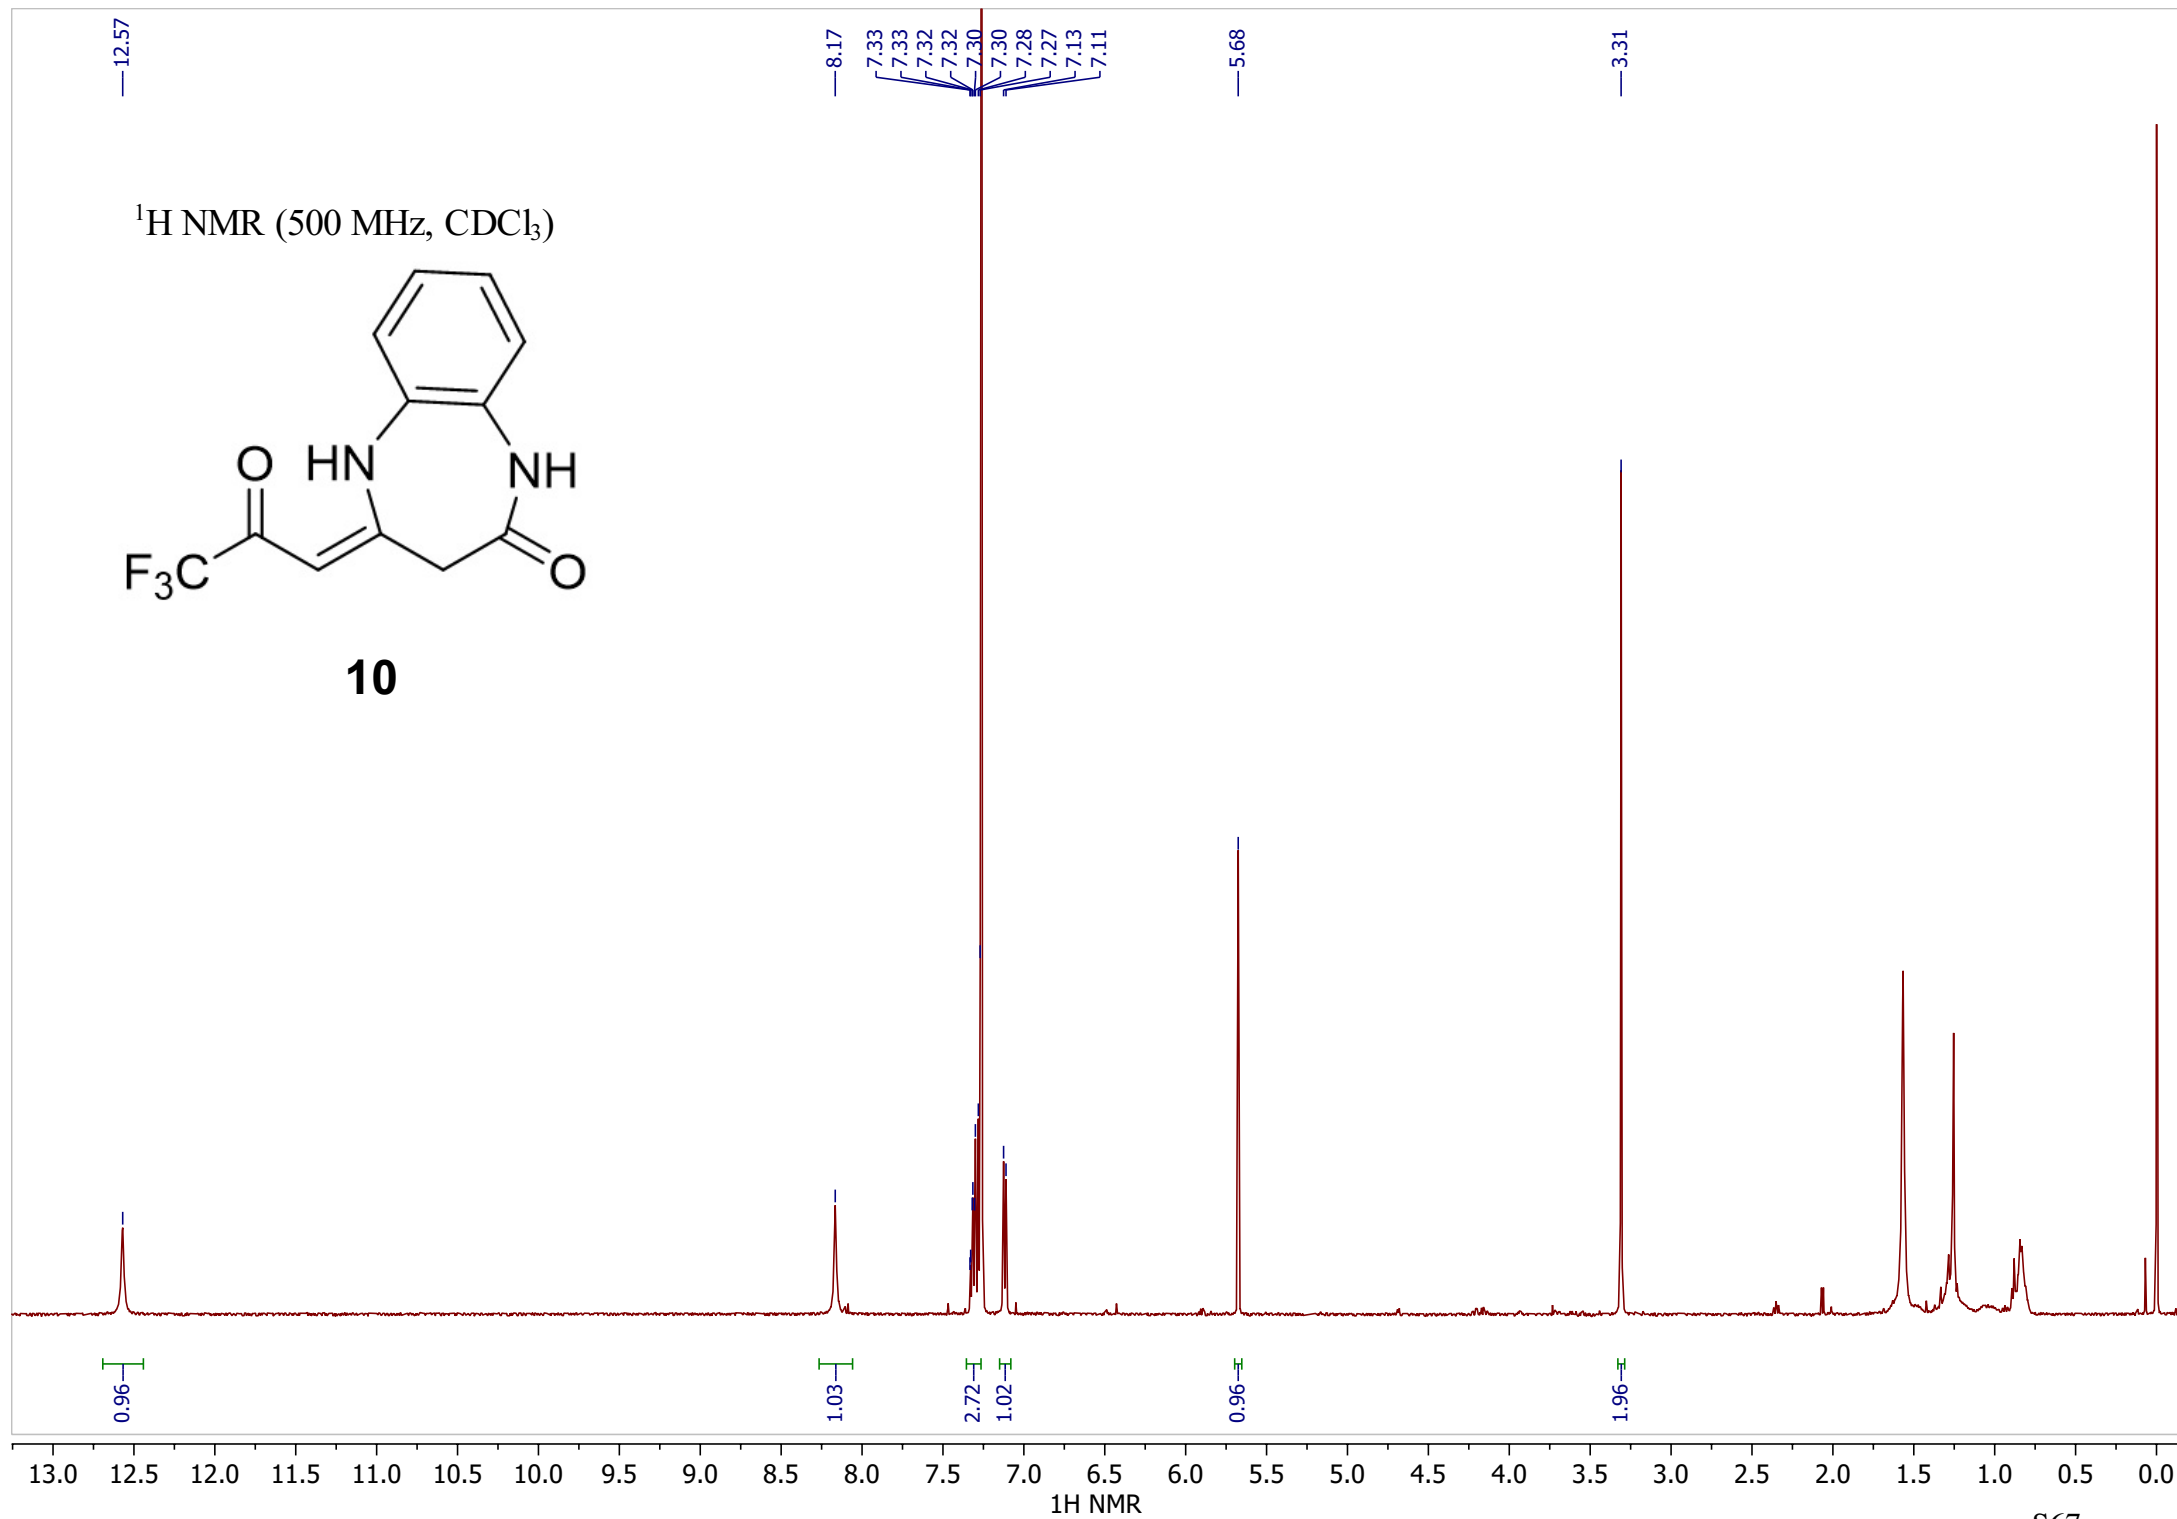

$^{19}\text{F}$  NMR (471 MHz,  $\text{CDCl}_3$ )

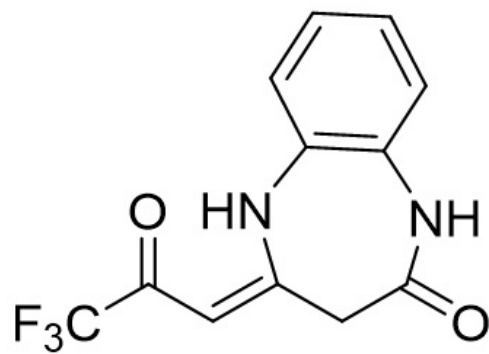

**10**

84.81

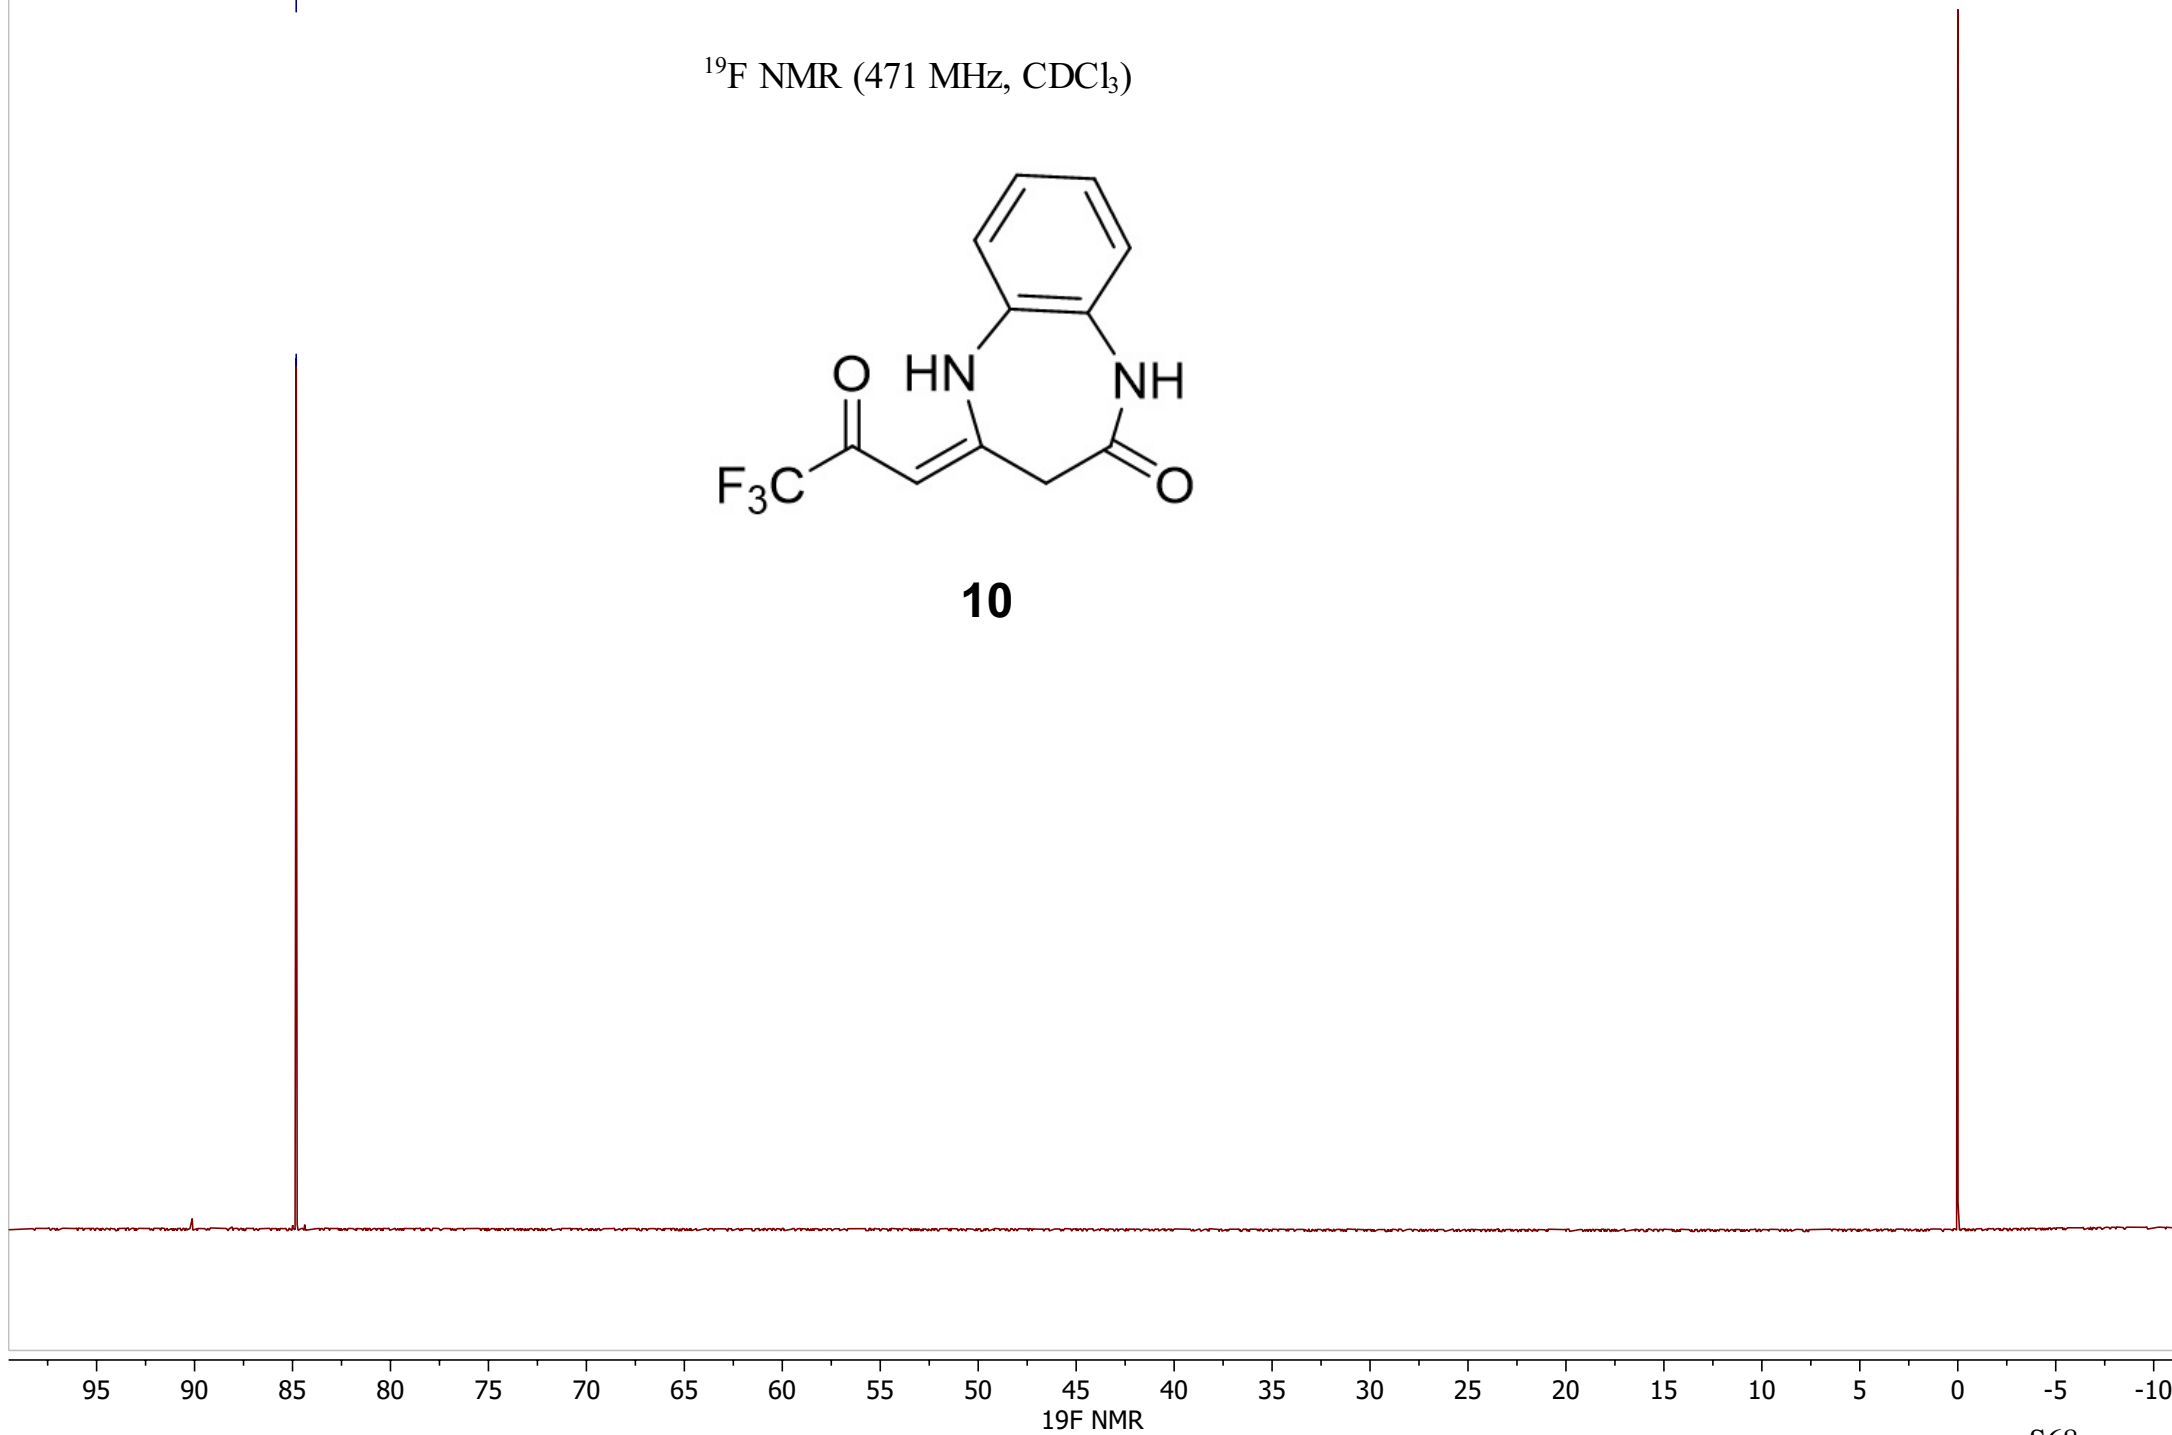

<sup>1</sup>H NMR (500 MHz, DMSO)

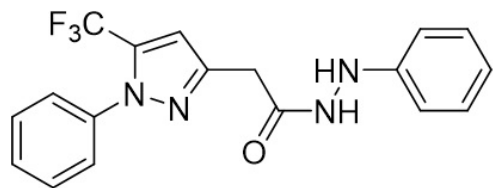

**13**

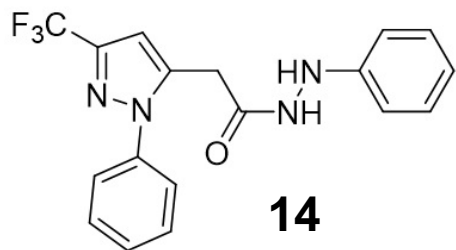

**14**

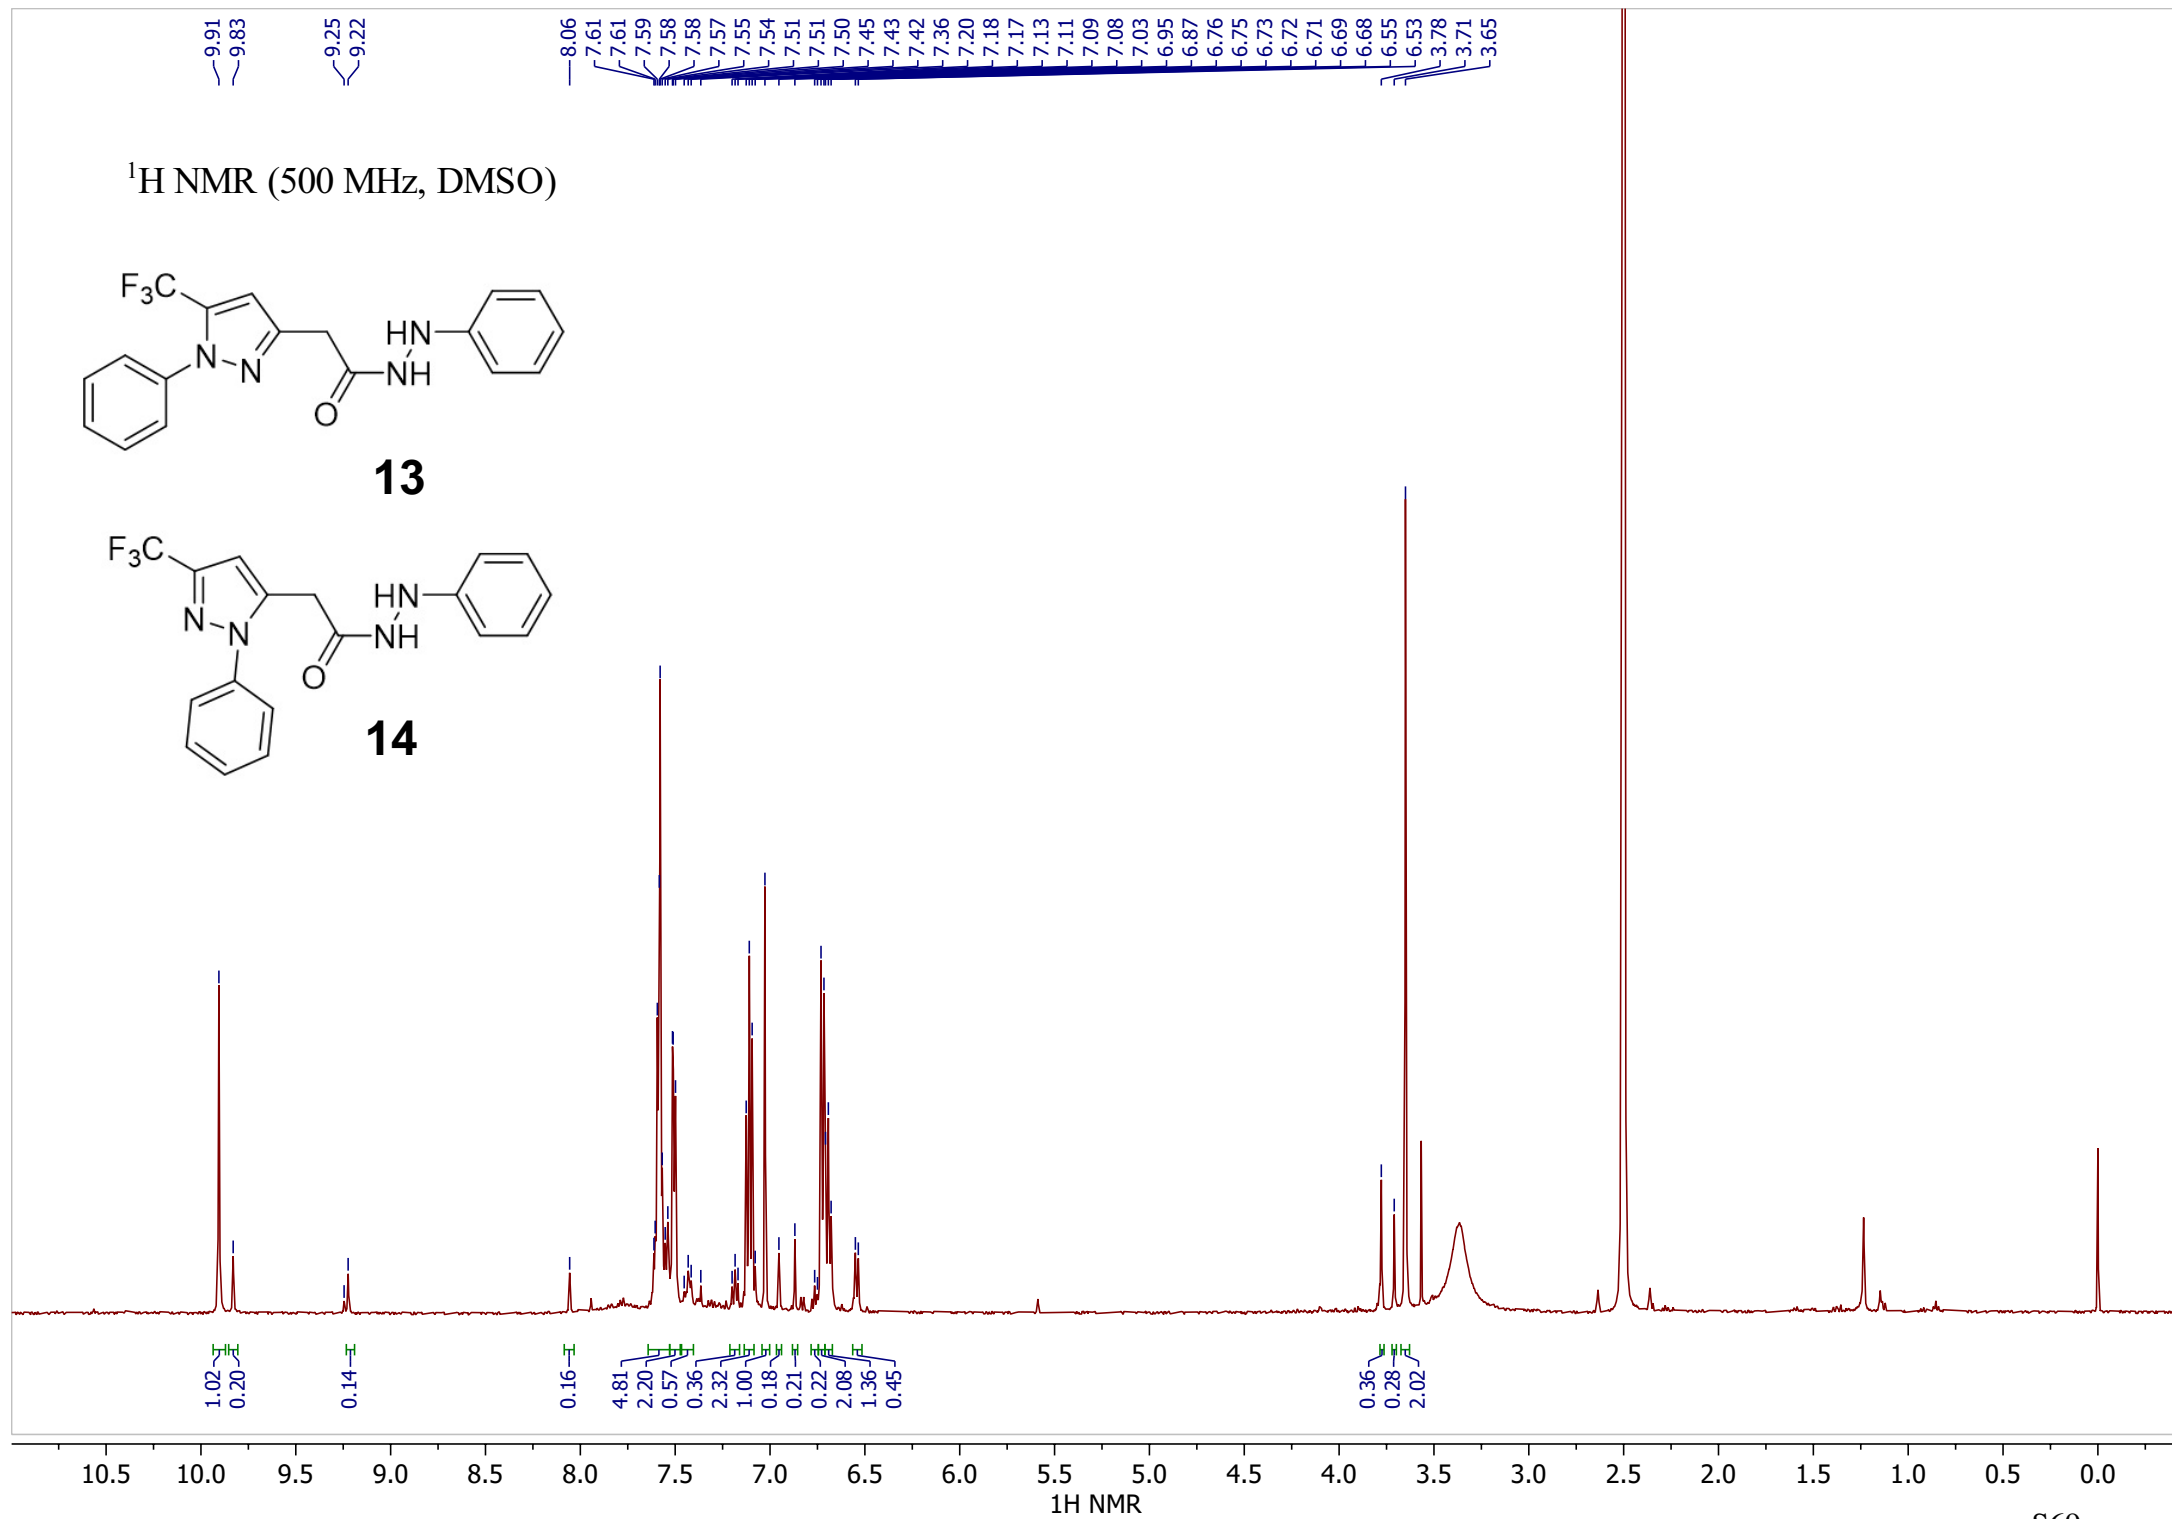

$^{19}\text{F}$  NMR (471 MHz, DMSO)

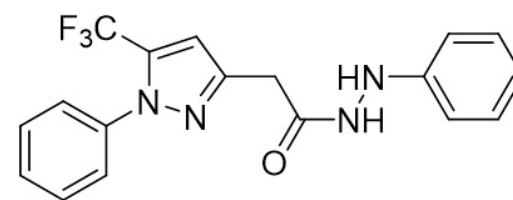

**13**

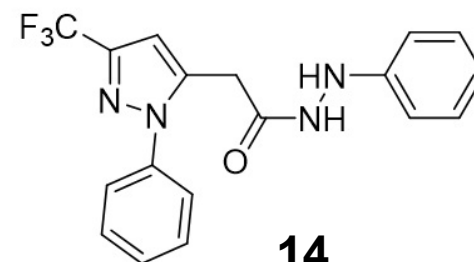

**14**

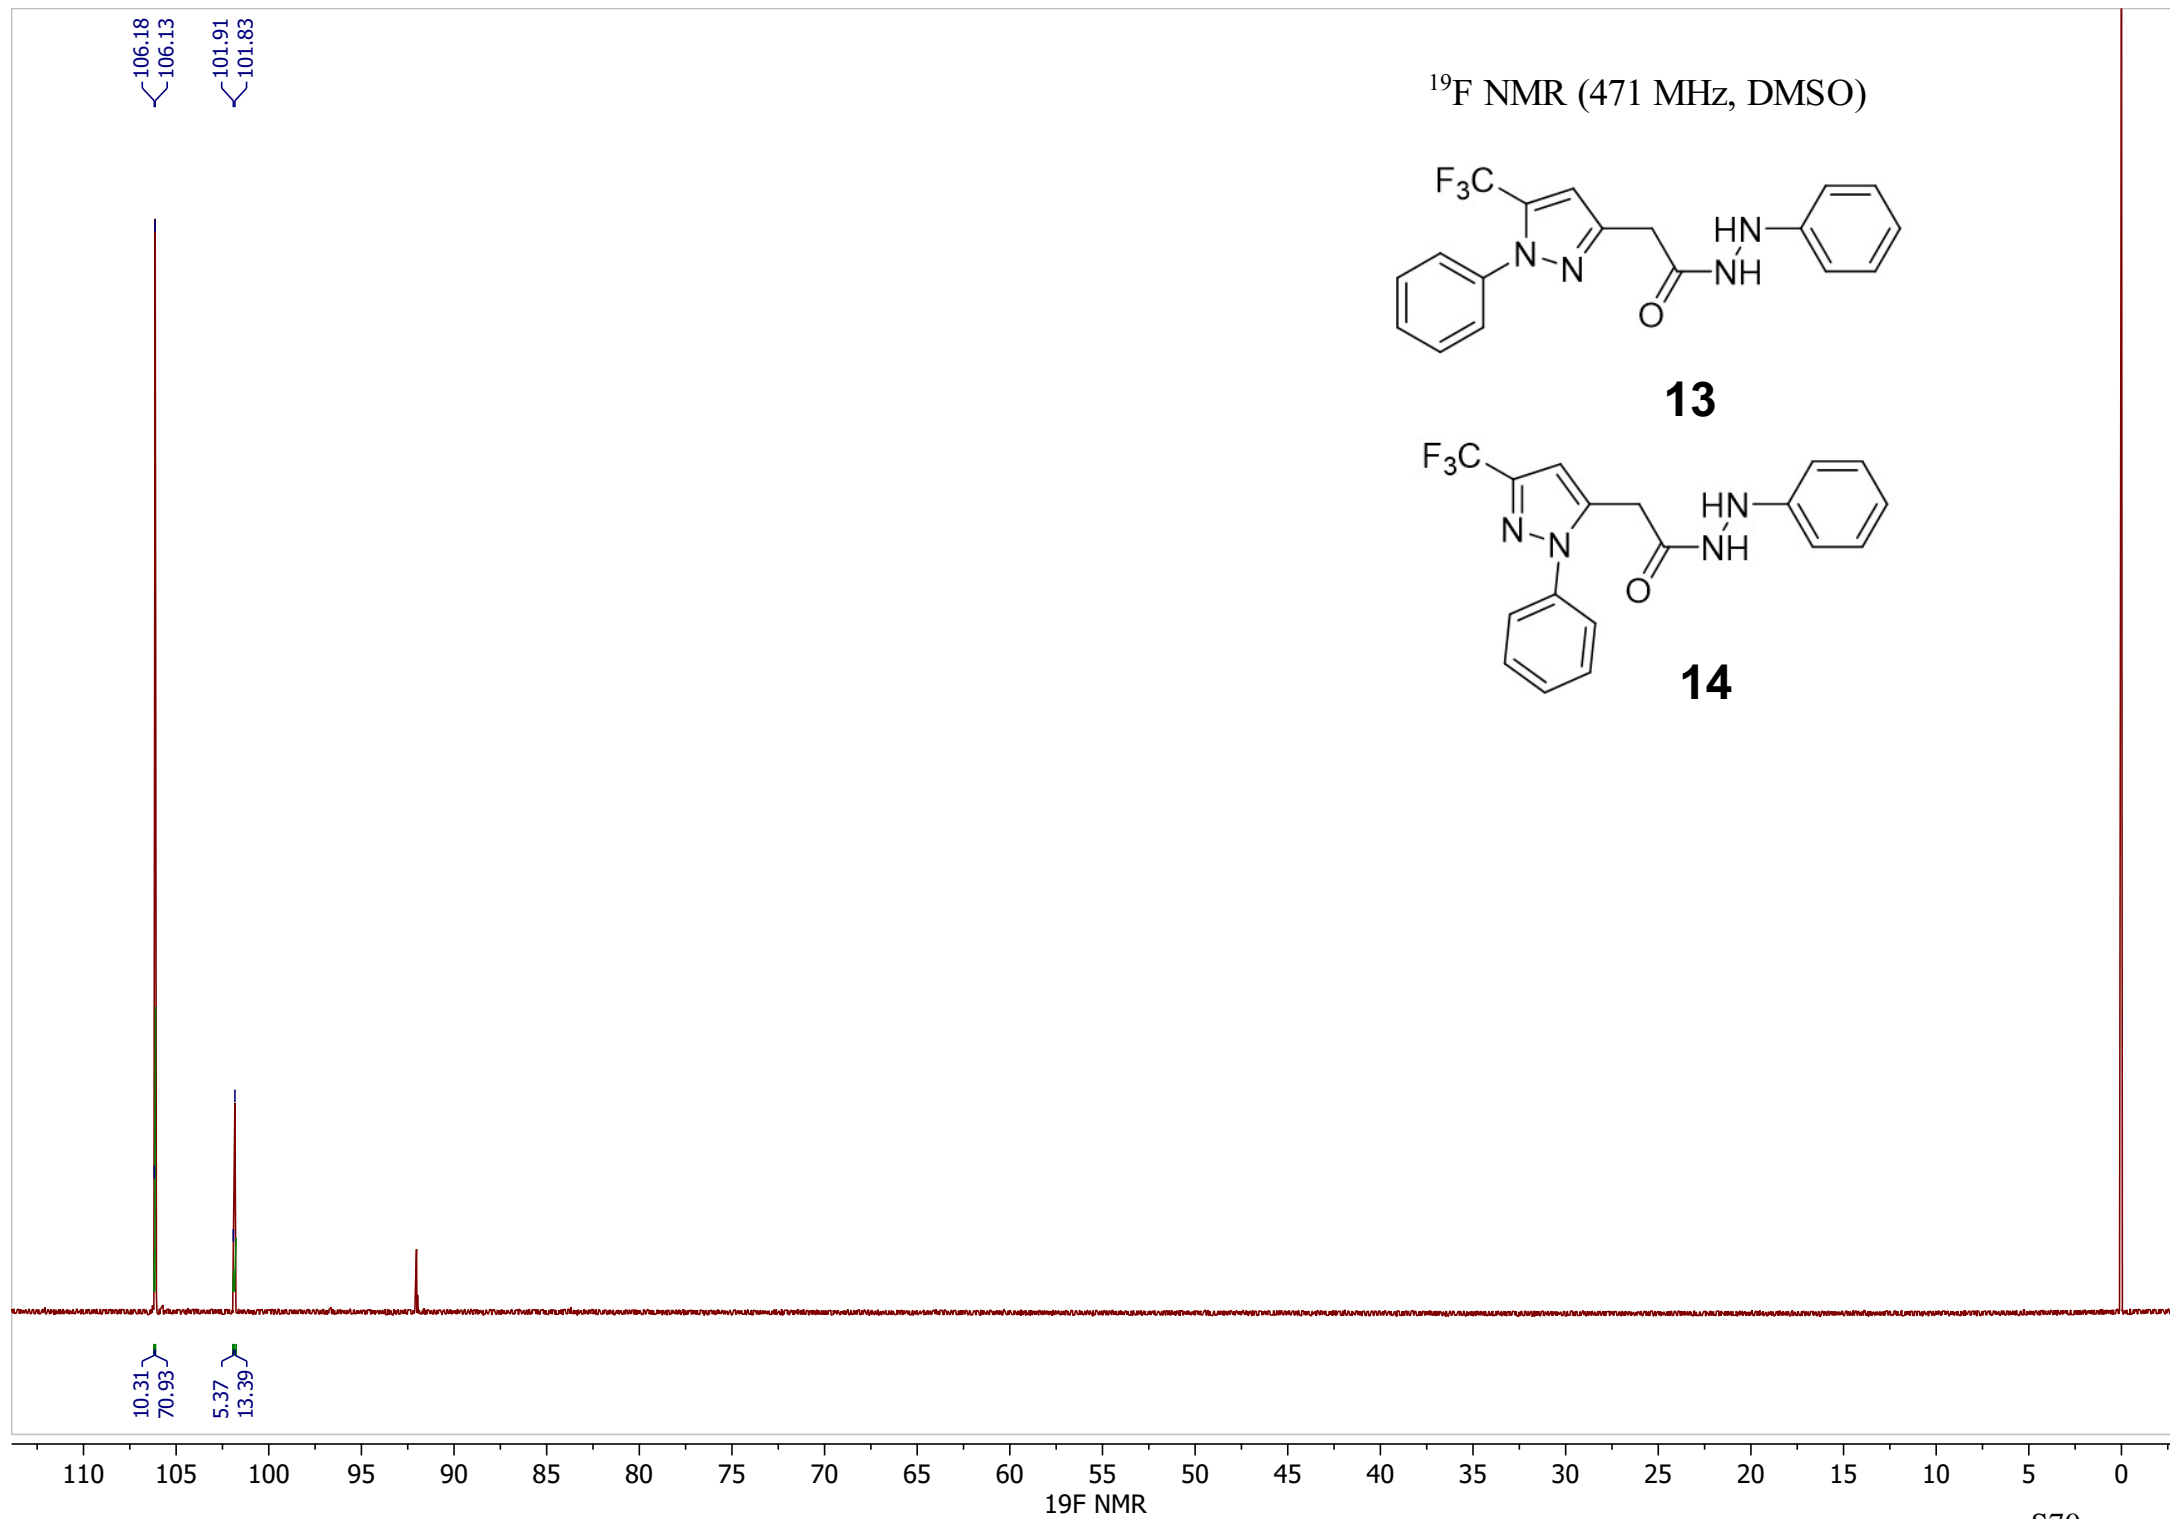

Supplement: s1 [file s1]
